# Supplementary material for: Building Streptomyces albus as a chassis for synthesis of bacterial terpenoids
Source: PubMed Central journal article supplement (PMC10055836; doi:10.1039/d2sc06033g), 2023-03-06
Supplement: SC-014-D2SC06033G-s001.pdf [file SC-014-D2SC06033G-s001.pdf]

## Supporting Information

### **Building *Streptomyces albus* as a Chassis for Synthesis of Diverse Bacterial Terpenoids**

Yi Ling Hu<sup>‡</sup>, Qi Zhang<sup>‡</sup>, Shuang He Liu, Jia Li Sun, Fang Zhou Yin, Zi Ru Wang, Jing Shi, Rui Hua Jiao<sup>\*</sup>, Hui Ming Ge<sup>\*</sup>

State Key Laboratory of Pharmaceutical Biotechnology, Institute of Functional Biomolecules, Chemistry and Biomedicine Innovation Center (ChemBIC), School of Life Sciences, Nanjing University, Nanjing, 210023 China. rhjiao@nju.edu.cn, hmge@nju.edu.cn.

<sup>‡</sup> These authors contribute equally to this work.

# CONTANTS

|                                                                                                                                              |    |
|----------------------------------------------------------------------------------------------------------------------------------------------|----|
| I. Experimental Procedures:.....                                                                                                             | 6  |
| DNA manipulation and plasmid construction. ....                                                                                              | 6  |
| Culture conditions of recombinant strains.....                                                                                               | 6  |
| Extraction and HPLC analysis of lycopene.....                                                                                                | 7  |
| Sequence similarity network (SSN) of terpene synthases. ....                                                                                 | 7  |
| Isolation and analysis of terpenoids. ....                                                                                                   | 7  |
| II. Supplementary Tables:.....                                                                                                               | 8  |
| Table S1 The titer of lycopene produced by recombinant strains in different conditions. ....                                                 | 8  |
| Table S2 Characterized bacterial terpene synthases and the e-value of HMM model search. ....                                                 | 8  |
| Table S3 Genbank number of terpenoids biosynthetic genes were mentioned in this study.....                                                   | 11 |
| Table S4 Plasmids were achieved in this study.....                                                                                           | 12 |
| Table S5 Primers and oligonucleotides were used in this study.....                                                                           | 13 |
| Table S6 <sup>1</sup> H NMR (400 MHz) and <sup>13</sup> C NMR (100 MHz) assignments for <b>2</b> in CDCl <sub>3</sub> . ....                 | 16 |
| Table S7 <sup>1</sup> H NMR (400 MHz) and <sup>13</sup> C NMR (100 MHz) assignments for <b>5'</b> in CDCl <sub>3</sub> . ....                | 17 |
| Table S8 <sup>1</sup> H NMR (400 MHz) and <sup>13</sup> C NMR (100 MHz) assignments for <b>6'</b> in CDCl <sub>3</sub> . ....                | 18 |
| Table S9 <sup>1</sup> H NMR (400 MHz) and <sup>13</sup> C NMR (100 MHz) assignments for <b>6</b> in C <sub>6</sub> D <sub>6</sub> .....      | 19 |
| Table S10 <sup>1</sup> H NMR (400 MHz) and <sup>13</sup> C NMR (100 MHz) assignments for <b>8</b> in CDCl <sub>3</sub> . ....                | 20 |
| Table S11 <sup>1</sup> H NMR (400 MHz) and <sup>13</sup> C NMR (100 MHz) assignments for <b>2a</b> in CDCl <sub>3</sub> . ....               | 21 |
| Table S12 <sup>1</sup> H NMR (400 MHz) and <sup>13</sup> C NMR (100 MHz) assignments for <b>3a</b> in methanol- <i>d</i> <sub>4</sub> . .... | 22 |
| Table S13 <sup>1</sup> H NMR (400 MHz) and <sup>13</sup> C NMR (100 MHz) assignments for <b>3b</b> in methanol- <i>d</i> <sub>4</sub> . .... | 23 |
| Table S14 <sup>1</sup> H NMR (400 MHz) and <sup>13</sup> C NMR (100 MHz) assignments for <b>3c</b> in methanol- <i>d</i> <sub>4</sub> .....  | 24 |
| Table S15 <sup>1</sup> H NMR (400 MHz) and <sup>13</sup> C NMR (100 MHz) assignments for <b>3e</b> in methanol- <i>d</i> <sub>4</sub> .....  | 25 |
| Table S16 <sup>1</sup> H NMR (400 MHz) and <sup>13</sup> C NMR (100 MHz) assignments for <b>4a</b> in CDCl <sub>3</sub> . ....               | 26 |
| Table S17 <sup>1</sup> H NMR (400 MHz) and <sup>13</sup> C NMR (100 MHz) assignments for <b>5a</b> in CDCl <sub>3</sub> . ....               | 27 |
| Table S18 <sup>1</sup> H NMR (400 MHz) and <sup>13</sup> C NMR (100 MHz) assignments for <b>6a</b> in CDCl <sub>3</sub> . ....               | 28 |
| Table S19 <sup>1</sup> H NMR (400 MHz) and <sup>13</sup> C NMR (100 MHz) assignments for <b>6b</b> in CDCl <sub>3</sub> . ....               | 29 |
| Table S20 <sup>1</sup> H NMR (400 MHz) and <sup>13</sup> C NMR (100 MHz) assignments for <b>9a</b> in CDCl <sub>3</sub> . ....               | 30 |
| Table S21 <sup>1</sup> H NMR (400 MHz) and <sup>13</sup> C NMR (100 MHz) assignments for <b>10a</b> in CDCl <sub>3</sub> . ....              | 31 |

|                                                                                                                                          |    |
|------------------------------------------------------------------------------------------------------------------------------------------|----|
| Table S22 <sup>1</sup> H NMR (400 MHz) and <sup>13</sup> C NMR (100 MHz) assignments for <b>10b</b> in CDCl <sub>3</sub> .               | 32 |
| Table S23 <sup>1</sup> H NMR (400 MHz) and <sup>13</sup> C NMR (100 MHz) assignments for <b>10c</b> in CDCl <sub>3</sub> .               | 33 |
| Table S24 <sup>1</sup> H NMR (400 MHz) and <sup>13</sup> C NMR (100 MHz) assignments for <b>10d</b> in CDCl <sub>3</sub> .               | 34 |
| Table S25 <sup>1</sup> H NMR (400 MHz) and <sup>13</sup> C NMR (100 MHz) assignments for <b>11a</b> in methanol- <i>d</i> <sub>4</sub> . | 35 |
| Table S26 <sup>1</sup> H NMR (400 MHz) and <sup>13</sup> C NMR (100 MHz) assignments for <b>11b</b> in methanol- <i>d</i> <sub>4</sub> . | 36 |
| Table S27 <sup>1</sup> H NMR (400 MHz) and <sup>13</sup> C NMR (100 MHz) assignments for <b>11c</b> in CDCl <sub>3</sub> .               | 37 |
| Table S28 <sup>1</sup> H NMR (400 MHz) and <sup>13</sup> C NMR (100 MHz) assignments for <b>12b</b> in CDCl <sub>3</sub> .               | 38 |
| Table S29 <sup>1</sup> H NMR (400 MHz) and <sup>13</sup> C NMR (100 MHz) assignments for <b>12c</b> in acetone- <i>d</i> <sub>6</sub> .  | 39 |
| III. Physicochemical data of compounds.                                                                                                  | 40 |
| IV. Supplementary Figures:                                                                                                               | 42 |
| Figure S1                                                                                                                                | 42 |
| Figure S2                                                                                                                                | 42 |
| Figure S3                                                                                                                                | 43 |
| Figure S4                                                                                                                                | 43 |
| Figure S5                                                                                                                                | 43 |
| Figure S6-S7 NMR spectra of <b>1</b> in CDCl <sub>3</sub> (400 MHz).                                                                     | 44 |
| Figure S8 EI mass spectrum of <b>1</b> .                                                                                                 | 45 |
| Figure S9-S15 NMR spectra of <b>2</b> in CDCl <sub>3</sub> (400 MHz).                                                                    | 45 |
| Figure S16 EI mass spectrum of <b>2</b> .                                                                                                | 49 |
| Figure S17-S18 NMR spectra of <b>3</b> in CDCl <sub>3</sub> (400 MHz).                                                                   | 49 |
| Figure S19 EI mass spectrum of <b>3</b> .                                                                                                | 50 |
| Figure S20-S21 NMR spectra of <b>4</b> in CDCl <sub>3</sub> (400 MHz).                                                                   | 51 |
| Figure S22 EI mass spectrum of <b>4</b> .                                                                                                | 52 |
| Figure S23-S24 NMR spectra of <b>5</b> in CDCl <sub>3</sub> (400 MHz).                                                                   | 52 |
| Figure S25 EI mass spectrum of <b>5</b> .                                                                                                | 53 |
| Figure S26-S32 NMR spectra of <b>5'</b> in CDCl <sub>3</sub> (400 MHz).                                                                  | 54 |
| Figure S33 EI mass spectrum of <b>5'</b> .                                                                                               | 57 |
| Figure S34-S40 NMR spectra of <b>6</b> in C <sub>6</sub> D <sub>6</sub> (400 MHz).                                                       | 58 |
| Figure S41 EI mass spectrum of <b>6</b> .                                                                                                | 61 |
| Figure S42-S48 NMR spectra of <b>6'</b> in CDCl <sub>3</sub> (400 MHz).                                                                  | 62 |

|                                                                                             |     |
|---------------------------------------------------------------------------------------------|-----|
| Figure S49 EI mass spectrum of <b>6'</b> .....                                              | 65  |
| Figure S50-S51 NMR spectra of <b>7</b> in CDCl <sub>3</sub> (400 MHz).....                  | 66  |
| Figure S52 EI mass spectrum of <b>7</b> .....                                               | 67  |
| Figure S53-S59 NMR spectra of <b>8</b> in CDCl <sub>3</sub> (400 MHz).....                  | 67  |
| Figure S60 EI mass spectrum of <b>8</b> .....                                               | 71  |
| Figure S61-S62 NMR spectra of <b>9</b> in CDCl <sub>3</sub> (400 MHz).....                  | 71  |
| Figure S63 EI mass spectrum of <b>9</b> .....                                               | 72  |
| Figure S64-S65 NMR spectra of <b>10</b> in CDCl <sub>3</sub> (400 MHz).....                 | 73  |
| Figure S66 EI mass spectrum of <b>10</b> .....                                              | 74  |
| Figure S67-S68 NMR spectra of <b>11</b> in CDCl <sub>3</sub> (400 MHz).....                 | 74  |
| Figure S69 EI mass spectrum of <b>11</b> .....                                              | 75  |
| Figure S70-S76 NMR spectra of <b>2a</b> in CDCl <sub>3</sub> (400 MHz).....                 | 76  |
| Figure S77 EI mass spectrum of <b>2a</b> .....                                              | 79  |
| Figure S78-S84 NMR spectra of <b>3a</b> in methanol- <i>d</i> <sub>4</sub> (400 MHz).....   | 80  |
| Figure S85 EI mass spectrum of <b>3a</b> .....                                              | 83  |
| Figure S86-S92 NMR spectra of <b>3b</b> in methanol- <i>d</i> <sub>4</sub> (400 MHz).....   | 84  |
| Figure S93 EI mass spectrum of <b>3b</b> .....                                              | 87  |
| Figure S94-S100 NMR spectra of <b>3c</b> in methanol- <i>d</i> <sub>4</sub> (400 MHz).....  | 88  |
| Figure S101 EI mass spectrum of <b>3c</b> .....                                             | 91  |
| Figure S102-S108 NMR spectra of <b>3e</b> in methanol- <i>d</i> <sub>4</sub> (400 MHz)..... | 92  |
| Figure S109 EI mass spectrum of <b>3e</b> .....                                             | 95  |
| Figure S110-S116 NMR spectra of <b>4a</b> in CDCl <sub>3</sub> (400 MHz).....               | 96  |
| Figure S117 EI mass spectrum of <b>4a</b> .....                                             | 99  |
| Figure S118-S124 NMR spectra of <b>5a</b> in CDCl <sub>3</sub> (400 MHz).....               | 100 |
| Figure S125 EI mass spectrum of <b>5a</b> .....                                             | 103 |
| Figure S126-S132 NMR spectra of <b>6a</b> in CDCl <sub>3</sub> (400 MHz).....               | 104 |
| Figure S133 EI mass spectrum of <b>6a</b> .....                                             | 107 |
| Figure S134-S140 NMR spectra of <b>6b</b> in CDCl <sub>3</sub> (400 MHz).....               | 108 |
| Figure S141 EI mass spectrum of <b>6b</b> .....                                             | 111 |
| Figure S142-S148 NMR spectra of <b>9a</b> in CDCl <sub>3</sub> (400 MHz).....               | 112 |

|                                                                                              |     |
|----------------------------------------------------------------------------------------------|-----|
| Figure S149 EI mass spectrum of <b>9a</b> .....                                              | 115 |
| Figure S150-S156 NMR spectra of <b>10a</b> in CDCl <sub>3</sub> (400 MHz).....               | 116 |
| Figure S157 EI mass spectrum of <b>10a</b> .....                                             | 119 |
| Figure S158-S164 NMR spectra of <b>10b</b> in CDCl <sub>3</sub> (400 MHz). ....              | 120 |
| Figure S165 EI mass spectrum of <b>10b</b> . ....                                            | 123 |
| Figure S166-S172 NMR spectra of <b>10c</b> in CDCl <sub>3</sub> (400 MHz).....               | 124 |
| Figure S173 EI mass spectrum of <b>10c</b> .....                                             | 127 |
| Figure S174-S180 NMR spectra of <b>10d</b> in CDCl <sub>3</sub> (400 MHz). ....              | 128 |
| Figure S181 EI mass spectrum of <b>10d</b> . ....                                            | 131 |
| Figure S182-S188 NMR spectra of <b>11a</b> in methanol- <i>d</i> <sub>4</sub> (400 MHz)..... | 132 |
| Figure S189 EI mass spectrum of <b>11a</b> .....                                             | 135 |
| Figure S190-S196 NMR spectra of <b>11b</b> in methanol- <i>d</i> <sub>4</sub> (400 MHz)..... | 136 |
| Figure S197 <sup>13</sup> C NMR spectrum of <b>11b</b> in CDCl <sub>3</sub> (100 MHz). ....  | 139 |
| Figure S198 EI mass spectrum of <b>11b</b> . ....                                            | 140 |
| Figure S199-S205 NMR spectra of <b>11c</b> in CDCl <sub>3</sub> (400 MHz).....               | 140 |
| Figure S206 EI mass spectrum of <b>11c</b> .....                                             | 144 |
| Figure S207-S2008 NMR spectra of <b>12a</b> in CDCl <sub>3</sub> (400 MHz).....              | 144 |
| Figure S209 EI mass spectrum of <b>12a</b> .....                                             | 145 |
| Figure S210-S216 NMR spectra of <b>12b</b> in CDCl <sub>3</sub> (400 MHz). ....              | 146 |
| Figure S217 EI mass spectrum of <b>12b</b> . ....                                            | 149 |
| Figure S218-S224 NMR spectra of <b>12c</b> in acetone- <i>d</i> <sub>6</sub> (400 MHz).....  | 150 |
| Figure S225 EI mass spectrum of <b>12c</b> .....                                             | 153 |
| References .....                                                                             | 154 |

## I. Experimental Procedures:

### DNA manipulation and plasmid construction.

The genomic DNA of actinobacteria was prepared according to the protocol described previously<sup>1</sup>. All plasmids were isolated from a 5 mL liquid culture of the corresponding *Escherichia coli* DH5 $\alpha$  strains using the SanPrep Column Plasmid Mini-Preps Kit (Sangon Biotech (Shanghai) Co., Ltd., China). PCR amplifications were conducted on a Bio-Rad S1000™ Thermal Cycler using Phanta Max Super-Fidelity DNA Polymerase (Nanjing Vazyme Biotech Co., Ltd., China). ClonExpress MultiS One Step Cloning Kit (Nanjing Vazyme Biotech Co., Ltd., China) was used to clone DNA into plasmid. DNA concentrations were measured using the NanoDrop 2000c Microvolume UV–vis spectrophotometer (Thermo Fisher Scientific). Sequence identity was confirmed by sequencing (Tsingke Biotechnology Co., Ltd., China). The plasmids used in this study were shown in Table S3. Primers and oligonucleotides were also synthesized by Sangon Biotech (Shanghai, China) and were shown in Table S4.

A paired oligonucleotides SF14p-F, SF14p-R were degenerated, and ligated with linearized vector pSOK804<sup>2</sup> at *Hind*III and *Eco*RI endonucleases cleavage sites to generate plasmid pSOK-SF14p. The *crt* cluster containing *crtE*, *crtI* and *crtB* genes of *Streptomyces avermitilis* was amplified with primers crtEIB-F and crtEIB-R and cloned into *Bcu*I and *Eco*RI site of pSOK-SF14p to generate plasmid pSOK-SF14p-*crt*. The promoter *kasOp*\* was amplified from plasmid pSET152-*kasOp*\* with paired primers *kasOp*\*-F/*kasOp*\*-R, and clone into pSOK-SF14p-*crt* between *Hind*III and *Bcu*I site to generate plasmid pSOK-*kasOp*\*-*crt*. The promoter *ermEp* was amplified from house-keeping plasmid pUW201 with paired primers *ermEp*-F/*ermEp*-R, and cloned into pSOK-SF14p-*crt* between *Hind*III and *Bcu*I site to generate plasmid pSOK-*ermEp*-*crt*. A SF14p-*crtE* gene fragment was amplified from pSOK-SF14p-*crt* using paired primers SF14p-F2/*crtE*-R, and a *ptlB* gene fragment was amplified from *S. avermitilis* genomic DNA using paired primers *ptlB*-F and *ptlB*-R, then both of the fragments were cloned into plasmid pSET152 at *Xba*I and *Xho*I site with hygromycin resistance gene to yield plasmid pSET-SF14p-EB. The identified terpene biosynthetic genes were amplified from genomic DNA and subsequently cloned into plasmid pSOK-SF14p between *Bcu*I and *Eco*RI sites. These plasmids were transferred into the *E. coli* ET12567 (pUZ8002) strain individually, and further introduced into *Streptomyces* by conjugation<sup>3</sup>.

### Culture conditions of recombinant strains.

ISP4 solid medium was used to display the color of strains, strains were cultured in plates for 3 days at 30 °C. Recombinant strains containing lycopene BGC were cultured in four mediums: A, F, ISP2, TSB. Recombinant strains containing others terpenoids BGCs were just cultured in F medium. All of them were cultured for 6 days at 180 rpm shaker in 5 liters' scale using 1-liter shake flask containing 200 mL liquid medium. After fermentation, the culture was extracted with ethyl acetate directly, and ethyl acetate was removed under reduced pressure to obtain crude extract which can be used for terpenoids isolation.

**ISP4 medium** (1 liter): soluble starch 10 g, K<sub>2</sub>HPO<sub>4</sub> 1 g, MgSO<sub>4</sub>•7H<sub>2</sub>O 1 g, NaCl 1 g, (NH<sub>4</sub>)<sub>2</sub>SO<sub>4</sub> 2 g, CaCO<sub>3</sub> 2 g, FeSO<sub>4</sub>•7H<sub>2</sub>O 1 mg, MnCl<sub>2</sub>•4H<sub>2</sub>O 1 mg, ZnSO<sub>4</sub>•7H<sub>2</sub>O 1 mg, agar 20 g.

**A medium** (1 liter): soluble starch 10 g, yeast extract 4 g, peptone 2 g, CaCO<sub>3</sub> 1 g, Fe<sub>2</sub>(SO<sub>4</sub>)<sub>3</sub>•4H<sub>2</sub>O 40 mg, KBr 100 mg.

**F medium** (1 liter): sucrose 20 g, glucose 10 g, casamino acids 0.1 g, yeast extract 5 g, MOPS 5 g, K<sub>2</sub>SO<sub>4</sub> 0.25 g, MgCl<sub>2</sub>•6H<sub>2</sub>O 1 g, trace elements solution 1 mL. Trace elements solution: ZnCl<sub>2</sub> 40 mg/L, FeCl<sub>3</sub>•6H<sub>2</sub>O 200 mg/L, CuCl<sub>2</sub>•2H<sub>2</sub>O 10 mg/L, MnCl<sub>2</sub>•4H<sub>2</sub>O 10 mg/L, Na<sub>2</sub>B<sub>4</sub>O<sub>7</sub>•10H<sub>2</sub>O 10 mg/L, (NH<sub>4</sub>)<sub>6</sub>Mo<sub>7</sub>O<sub>24</sub>•4H<sub>2</sub>O 10 mg/L.

**ISP2 medium** (1 liter): glucose 4 g, yeast extract 4 g, malt extract 10 g.

**TSB medium** (1 liter): pancreatin digest of casein 17 g, papain digest of soybean meal 3 g, NaCl 5 g, K<sub>2</sub>HPO<sub>4</sub> 2.5 g, glucose 2.5 g.

### **Extraction and HPLC analysis of lycopene.**

To extract lycopene from the *Streptomyces* strains, 2 mL aliquots of the cell cultures were centrifuged at 13,000 ×g for 10 min and washed twice with deionized water. The mycelia were lyophilized directly in dark, and grinded in liquid nitrogen using a grinder Tissuelyser-GXF (Jingxin Industrial Development Co., Ltd., China), then the pigments were extracted with 1 mL organic reagents (acetone : ethyl acetate = 1 : 1), when necessary, several extraction cycles were performed to remove all visible colors from the cell pellets. The lycopene content in the extracts was quantified through absorbance at 470 nm by high performance liquid chromatography (HPLC) analyses on an Agilent 1200 series HPLC system, with a diode array detector (DAD) for UV/visible (Vis) spectrum. A Poroshell 120 EC-C18 column (4.6 ×50 mm, 2.7 μm, Agilent) was used and isocratic elution with 80% acetonitrile/methanol for 20 min during the analysis. The injection volume was 5 μL and the flow rate was kept constantly at 0.5 mL/min. And the concentrations of lycopene were calculated using a standard curve (Figure S3B) and appropriate dilutions. The lycopene (B20378, HPLC > 90 %) was purchased from Shanghai yuanye Bio-Technology, the UV-Vis spectrum of standard and extract lycopene were showed in Figure S3C.

### **Sequence similarity network (SSN) of terpene synthases.**

A proteome database was established based on sequenced actionbacteria in our laboratory collection including obtained from public collections and isolated from nature directly. HMM model search was achieved by command hmmsearch of HMMER 3.1b2 with default parameters. The e-values of terpene synthases to each other were calculated using the ncbi-blast tool, and the SSN was visualized by CytoScape 3.5.1 software<sup>4</sup>.

### **Isolation and analysis of terpenoids.**

Terpene skeletons were purified from crude extracts by column chromatography on silica gel using petroleum ether as eluent. Low polarity terpenoids containing modification were also purified by silica-gel column, and eluted with the mixture of petroleum ether and ethyl acetate. Crude extracts of other terpenoids were fractionated by Medium Pressure Liquid Chromatography (MPLC) over ODS column eluted with a linear gradient MeOH-H<sub>2</sub>O system from 10% MeOH to 100% MeOH. The target fractions were further purified by semi-preparative HPLC. LC-MS analysis was performed on an Agilent 6530 TOF LC/MS mass spectrometer with a Poroshell 120 EC-C18 column (4.6×50 mm, 2.7 μm, Agilent Technologies). GC-MS analysis was performed on an Agilent (Santa Clara, CA, USA) 7890B GC fitted with a HP-5ms fused silica capillary column (30 m, 0.25 mm i. d., 0.25 μm film), which was connected to a 5977A mass detector was used to record GC/MS data. GC parameters were 1) inlet pressure: 77.1 kPa, He at 20 mL min<sup>-1</sup>, 2) injection volume: 1 μL, 3) temperature program: 5 min at 80 °C increasing at 10 °C min<sup>-1</sup> to 240 °C and then 5 °C min<sup>-1</sup> to 280 °C, 4) 60 s valve time, 5) carrier gas: He at 1.0 mL min<sup>-1</sup>. MS parameters were 1) source: 230 °C, 2) transfer line: 250 °C, 3) quadrupole: 150 °C and 4) electron energy: 70 eV. The NMR spectra were collected on Bruker Avance 400 with 400 MHz for <sup>1</sup>H and 100 MHz for <sup>13</sup>C nuclei. Optical rotations were recorded on a S3 Rudolph Research Analytical Autopol VI automatic polarimeter using a 50 mm pathlength cell with  $[\alpha]_D^{25}$  values reported in degrees; concentration (c) is in g/100mL.

## II. Supplementary Tables:

**Table S1** The titer (mg / L) of lycopene produced by recombinant strains in different conditions.

| Medium/promoter | J1074-crt    | 1018-crt     | M1154-crt    | SBT18-crt   |
|-----------------|--------------|--------------|--------------|-------------|
| A/ SF14p        | 22.19 ± 1.2  | 10.05 ± 0.64 | 10.49 ± 1.84 | 7.8 ± 0.83  |
| F/ SF14p        | 32.83 ± 2.43 | 8.72 ± 0.22  | 8.37 ± 1.77  | 3.25 ± 0.27 |
| F/ kasOp*       | 8.55 ± 0.99  |              |              |             |
| F/ ermEp        | 5.21 ± 0.64  |              |              |             |
| ISP2/ SF14p     | 15.92 ± 0.67 | 19.16 ± 3.14 | 2.76 ± 0.3   | 6.34 ± 0.38 |
| TSB/ SF14p      | 12.8 ± 0.14  | 5.17 ± 0.51  | 2.85 ± 0.08  | 4.41 ± 0.46 |

**Table S2** Characterized bacterial terpene synthases and the e-value of HMM model search.

| Entry      | PF03936 | PF19086 | Product / annotation               | Cn | Ref.  |
|------------|---------|---------|------------------------------------|----|-------|
| A0A0H5BN57 | 2.7E-05 | 1E-32   | (12E)-Labda-8(17),12,14-triene     | 20 | (5,6) |
| A0A0H5BN61 | 4.1E-05 | 8E-36   | (12E)-Labda-8(17),12,14-triene     | 20 | (5,6) |
| A0A291SJC7 | 0.00051 | 3E-36   | (+)-Isoafricanol                   | 15 | (7)   |
| A3KI17     | 3.8E-05 | 1E-29   | 2-Methylisoborneol                 | 11 | (8)   |
| A4FG19     |         | 4E-31   | 2-Methylisoborneol                 | 11 | (8)   |
| A7NH01     | 0.00024 | 2E-49   | (+)-T-Muurolol                     | 15 | (9)   |
| A9FZ87     | 2E-06   | 3E-44   | (+)-Eremophilene                   | 15 | (9)   |
| A9GK58     | 6.7E-05 | 9E-43   | 10- <i>epi</i> -Cubebol            | 15 | (9)   |
| ADU79148   |         | 2E-26   | 2-Methylisoborneol                 | 11 | (9)   |
| ADU79149   |         | 9E-26   | 2-Methylisoborneol                 | 11 | (10)  |
| AEK21533   |         | 6E-25   | 2-Methylisoborneol                 | 11 | (10)  |
| AGO55049   | 8.5E-06 | 2E-24   | Sodorifen                          | 15 | (11)  |
| ALO06273   | 7.2E-06 | 6E-32   | Venezuelaenes, VenA                | 20 | (12)  |
| B1W019     | 5.6E-06 | 1E-39   | (+)-Caryolan-1-ol                  | 15 | (9)   |
| B2J4A4     | 1.9E-10 | 1E-49   | 5- <i>epi</i> - $\alpha$ -Selinene | 15 | (9)   |
| B5GMG2     | 7.2E-07 | 4E-46   | 1,8-Cineole                        | 10 | (9)   |
| B5GRC8     |         | 2E-21   | Labda-7,13(16),14-triene           | 20 | (6)   |
| B5GS26     |         | 4E-36   | (-)- $\delta$ -Cadinene            | 15 | (9)   |
| B5GW45     |         | 4E-31   | (+)-T-Muurolol                     | 15 | (9)   |
| B5H7H3     | 1.7E-08 | 3E-47   | Pristinol                          | 15 | (13)  |
| B5HDJ6     |         | 8E-32   | Selina-4(15),7(11)-diene           | 15 | (9)   |



|          |         |       |                                         |    |      |
|----------|---------|-------|-----------------------------------------|----|------|
| BAL14866 | 6E-06   | 4E-41 | (-)-Germacradien-4-ol                   | 15 | (9)  |
| BAL14867 |         | 8E-31 | (-)- <i>epi</i> - $\alpha$ -Bisabolol   | 15 | (9)  |
| BAP82203 | 8.6E-07 | 4E-32 | Cyclooctat-7(8),10(14)-diene            | 20 | (9)  |
| BAP82213 | 0.00037 | 3E-39 | (-)-Germacradien-4-ol                   | 15 | (9)  |
| BAP82216 |         | 4E-34 | (-)-Isohirsut-4-ene                     | 15 | (9)  |
| BAP82223 | 0.00021 | 9E-35 | Selina-3,7(11)-diene                    | 15 | (9)  |
| BAP82229 | 4.6E-07 | 1E-28 | Odyverdiene-A                           | 20 | (9)  |
| C7PLV2   | 2.1E-06 | 9E-49 | $\gamma$ -Cadinene                      | 15 | (9)  |
| C9K1X5   |         | 2E-08 | Cyclooctat-9-en-7-ol, CotB2             | 20 | (9)  |
| CCA53839 | 4.2E-07 | 1E-33 | (+)-Dauca-8,11-diene                    | 15 | (9)  |
| D2B747   | 6.4E-08 | 2E-43 | 4- <i>epi</i> -Cubebol                  | 15 | (9)  |
| D3KYU2   | 3.2E-05 | 2E-29 | 2-Methylisoborneol                      | 11 | (8)  |
| D5SL78   |         | 2E-37 | (3R)-Linalool                           | 10 | (9)  |
| D9XD61   | 1.5E-05 | 3E-42 | 7- <i>epi</i> - $\alpha$ -Eudesmol      | 15 | (9)  |
| D9XDR8   |         | 2E-23 | $\alpha$ -Amorphene                     | 15 | (9)  |
| E3VWJ0   | 1.3E-09 | 3E-44 | Pentalenene                             | 15 | (14) |
| E4MYY0   | 3.1E-05 | 1E-37 | (2Z,6E)-Hedycaryol                      | 15 | (9)  |
| E4N7E5   |         | 3E-30 | Corvol-ether A and B                    | 15 | (9)  |
| E8W6C7   | 3.6E-09 | 6E-38 | (+)-(1(10)E,4E,6S,7R)-Germacradien-6-ol | 15 | (9)  |
| EFG04655 |         | 2E-28 | Clavulatriene A                         | 20 | (9)  |
| EFG04889 |         | 1E-29 | (-)-Isohirsut-1-ene                     | 15 | (9)  |
| G2P5T1   | 8.8E-05 | 6E-39 | Isoafricanol                            | 15 | (9)  |
| I2N045   |         | 2E-26 | Tsukubadiene, TdS                       | 20 | (9)  |
| K0K750   | 1.2E-08 | 8E-41 | (E)- $\beta$ -Caryophyllene             | 15 | (9)  |
| M1V9Q0   |         | 4E-24 | Cembrene C, DtcycA                      | 20 | (15) |
| M1VDX3   |         | 9E-18 | Nephtenol, DtcycB                       | 20 | (15) |
| P0DPK6   | 9E-06   | 3E-36 | Spiroviolene_SvS                        | 20 | (16) |
| Q45222   | 8.8E-08 | 3E-12 | <i>ent</i> -kaurene, blr2150            | 20 | (17) |
| Q55012   | 6.5E-08 | 4E-44 | Pentalenene                             | 15 | (9)  |
| Q5KSN4   | 0.0012  | 1E-05 | <i>ent</i> -Pimara-9(11)-15-diene       | 20 | (18) |
| Q82IY4   | 4E-09   | 5E-43 | Pentalenene                             | 15 | (19) |
| Q82RR7   |         | 7E-41 | Avermitilol                             | 15 | (9)  |
| Q9AJE3   | 0.00093 | 1E-23 | Terpentetriene, CYC2                    | 20 | (20) |
| Q9F1V8   | 3.3E-06 | 6E-31 | 2-Methylisoborneol                      | 11 | (10) |

|              |         |       |                                    |    |      |
|--------------|---------|-------|------------------------------------|----|------|
| Q9F1Y6       | 0.00035 | 1E-26 | 2-Methylisoborneol                 | 11 | (9)  |
| Q9K499       | 5.8E-05 | 2E-38 | <i>epi</i> -Isozizaene             | 15 | (9)  |
| Q9X839       | 1.4E-07 | 2E-88 | Germacradienol and Geosmin         | 15 | (21) |
| TWH66842     | 0.0011  | 5E-25 | 2-Methylisoborneol                 | 11 | (10) |
| WP_003955204 | 3.2E-05 | 6E-34 | Intermedeol                        | 15 | (9)  |
| WP_003963279 |         | 2E-27 | Hydropyrene                        | 20 | (9)  |
| WP_003963391 | 5.1E-06 | 4E-34 | African-2-ene                      | 15 | (9)  |
| WP_004941320 |         | 6E-19 | Sestermobaraene                    | 25 | (22) |
| WP_006348376 | 0.00058 | 3E-33 | Selina-3,7(11)-diene               | 15 | (9)  |
| WP_010314578 | 4.7E-06 | 8E-35 | Spinodiene, SoS                    | 20 | (9)  |
| WP_010998816 | 7.1E-07 | 2E-41 | Germacrene A                       | 15 | (9)  |
| WP_011318775 | 2.5E-08 | 7E-42 | Germacrene A                       | 15 | (9)  |
| WP_011333305 | 0.0002  | 8E-31 | 2-Methylenebornane                 | 11 | (9)  |
| WP_011958209 | 2.7E-05 | 3E-49 | (+)-T-Muurolol                     | 15 | (9)  |
| WP_012190524 | 2.3E-07 | 6E-41 | Obscuronatin                       | 20 | (9)  |
| WP_012190525 | 8.4E-06 | 4E-36 | $\alpha$ -Selinene                 | 15 | (9)  |
| WP_012381690 | 2.8E-08 | 6E-47 | (+)- <i>epi</i> -Cubanol           | 15 | (9)  |
| WP_012394883 |         | 1E-36 | (+)-Allohedycaryol                 | 15 | (9)  |
| WP_012789469 | 1.5E-09 | 3E-40 | 18-Hydroxydolabella-3,7-diene      | 20 | (9)  |
| WP_013004899 | 6.3E-05 | 3E-31 | Neomeranol B                       | 15 | (23) |
| WP_014150548 |         | 7E-32 | Cattleyene, CyS                    | 20 | (24) |
| WP_028183010 | 2.9E-11 | 8E-18 | Isopimara-8,15-diene, SaDTS        | 20 | (25) |
| WP_030426588 |         | 2E-35 | Spiroalbatene, SaS                 | 20 | (26) |
| WP_030430753 |         | 1E-35 | Cembrene A, CAS                    | 20 | (26) |
| WP_030431358 |         | 9E-21 | Allokutznerene and Phomopsene, PmS | 20 | (27) |
| WP_030432512 |         | 8E-30 | Bonnadiene, BdS                    | 20 | (27) |
| WP_035852539 |         | 6E-29 | $\beta$ -Himachalene               | 15 | (28) |
| WP_035857999 |         | 1E-32 | $\gamma$ -Bisabolene               | 15 | (29) |
| WP_039829446 |         | 5E-26 | Phomopsene                         | 20 | (26) |
| WP_041328593 | 9.9E-06 | 2E-44 | Cembrene C                         | 20 | (26) |
| WP_051714436 |         | 9E-24 | Phomopsene                         | 20 | (25) |
| WP_052407688 |         | 9E-21 | Phomopsene                         | 20 | (25) |
| WP_054468580 |         | 2E-25 | 2-Methylisoborneol                 | 11 | (10) |
| WP_073290622 |         | 8E-31 | Chryseodiene, CpCS                 | 20 | (30) |

|              |         |       |                                |    |      |
|--------------|---------|-------|--------------------------------|----|------|
| WP_089795910 | 5.2E-08 | 5E-35 | Wanjudiene, CwWS               | 20 | (30) |
| WP_091046421 | 0.00055 | 1E-38 | Micromonocyclol                | 20 | (31) |
| WP_095757924 | 1.5E-05 | 2E-45 | Spata-13,17-diene, SpS         | 20 | (32) |
| WP_100105659 | 0.00015 | 1E-86 | Germacradienol and Geosmin     | 15 | (21) |
| WP_190371453 |         | 7E-90 | Germacradienol and Geosmin     | 15 | (21) |
| WP_239771469 | 0.00029 | 2E-35 | Benditerpe-2,6,15-triene, Bnd4 | 20 | (33) |
| YP_001866236 | 2.2E-06 | 1E-88 | Geosmin                        | 15 | (9)  |

**Table S3** Genbank number of terpenoids biosynthetic genes were mentioned in this study.

| Symbol of gene | Genbank No. | Symbol of gene | Genbank No. |
|----------------|-------------|----------------|-------------|
| <i>crtE</i>    | BAB69143    | <i>euoG</i>    | PNE32286    |
| <i>crtI</i>    | BAB69144    | <i>euoT</i>    | PNE32120    |
| <i>crtB</i>    | BAB69145    | <i>euoD</i>    | PNE32119    |
| <i>ptlB</i>    | BAC70708    | <i>sspM</i>    | OLZ59235    |
| <i>argF</i>    | UYP65652    | <i>sspG</i>    | OLZ59235    |
| <i>argT</i>    | UYP65651    | <i>sspT</i>    | OLZ59233    |
| <i>eurT</i>    | PNE30129    | <i>aliG</i>    | PAU49966    |
| <i>eurP</i>    | PNE30127    | <i>aliT</i>    | PAU49965    |
| <i>netO</i>    | GGR09481    | <i>aliT'</i>   | PAU49964    |
| <i>netT</i>    | GGR09488    | <i>aliP</i>    | PAU49973    |
| <i>netA</i>    | GGR09494    | <i>xylT</i>    | SDY90229    |
| <i>netP</i>    | GGR09501    | <i>xylP</i>    | SDY90207    |
| <i>forF</i>    | ATL29994    | <i>natG</i>    | KIZ16993    |
| <i>forD1</i>   | ATL29995    | <i>natT1</i>   | KIZ16994    |
| <i>forD2</i>   | ATL29996    | <i>natT2</i>   | KIZ16995    |
| <i>forT</i>    | ATL29997    | <i>spgP</i>    | UYP65655    |
| <i>morG</i>    | GHF23893    | <i>spgT1</i>   | UYP65653    |
| <i>morT</i>    | GHF23885    | <i>spgT2</i>   | UYP65654    |
| <i>morP</i>    | GHF23877    | <i>vspP</i>    | QKW17372    |
| <i>ariP1</i>   | SFP28037    | <i>vspT1</i>   | QKW17371    |
| <i>ariT</i>    | SFP28068    | <i>vspT2</i>   | QKW17370    |
| <i>ariP2</i>   | SFP28100    | <i>aspP1</i>   | QKW39411    |
| <i>ariP3</i>   | SFP28132    | <i>aspP2</i>   | QKW39412    |
| <i>albG</i>    | PAU47878    | <i>aspT1</i>   | QKW39413    |
| <i>albT</i>    | PAU47876    | <i>aspT2</i>   | QKW40963    |
| <i>albU</i>    | PAU47875    | <i>fraT1</i>   | SDG51259    |
| <i>albP1</i>   | PAU47874    | <i>fraT2</i>   | SDG51286    |
| <i>albP2</i>   | PAU47873    | <i>fraG</i>    | SDG51315    |
|                |             | <i>fraP</i>    | SDG51324    |

**Table S4** Plasmids were achieved in this study.

| Plasmid         | Genes were cloned             | Product       | Description                                                                                                                                                    |
|-----------------|-------------------------------|---------------|----------------------------------------------------------------------------------------------------------------------------------------------------------------|
| pSOK-SF14p      | -                             | -             | a SF14p promoter was inserted into pSOK804 between <i>HindIII</i> and <i>EcoRI</i> site.                                                                       |
| pSOK-SF14p-crt  | <i>crtE, crtB, crtI</i>       | lycopene      | a crt cluster containing <i>crtE, crtB, crtI</i> was inserted into pSOK-SF14p between <i>BcuI</i> and <i>EcoRI</i> site.                                       |
| pSOK-kasOp*-crt | <i>crtE, crtB, crtI</i>       | lycopene      | promoter SF14p was deleted and promoter kasOp* was inserted into pSOK-SF14p-crt between <i>HindIII</i> and <i>BcuI</i> site.                                   |
| pSOK-ermEp-crt  | <i>crtE, crtB, crtI</i>       | lycopene      | promoter SF14p was deleted and promoter ermEp was inserted into pSOK-SF14p-crt between <i>HindIII</i> and <i>BcuI</i> site.                                    |
| pSET-SF14p-EB   | <i>crtE, crtB, crtI</i>       | lycopene      | <i>crtE</i> and <i>ptlB</i> under control of SF14p promoter inserted into pSET152 between <i>XbaI</i> and <i>XhoI</i> .                                        |
| pSOK-argT       | <i>argT</i>                   | <b>1</b>      | gene <i>argT</i> was amplified by paired primers <i>argT-F / argT-R</i> and cloned into pSOK-SF14p between <i>BcuI</i> and <i>EcoRI</i> site.                  |
| pSOK-eurT       | <i>eurT</i>                   | <b>2</b>      | gene <i>eurT</i> was amplified by paired primers <i>eurT-F / eurT-R</i> and cloned into pSOK-SF14p between <i>BcuI</i> and <i>EcoRI</i> site.                  |
| pSOK-netT       | <i>netT</i>                   | <b>3</b>      | gene <i>netT</i> was amplified by paired primers <i>netT-F / netT-R</i> and cloned into pSOK-SF14p between <i>BcuI</i> and <i>EcoRI</i> site.                  |
| pSOK-forT       | <i>forT</i>                   | -             | gene <i>forT</i> was amplified by paired primers <i>forT-F / forT-R</i> and cloned into pSOK-SF14p between <i>BcuI</i> and <i>EcoRI</i> site.                  |
| pSOK-morT       | <i>morG, morT</i>             | <b>4</b>      | fragment <i>morG-morT</i> was amplified by paired primers <i>morG-F / morT-R</i> and cloned into pSOK-SF14p between <i>BcuI</i> and <i>EcoRI</i> site.         |
| pSOK-ariT       | <i>ariT</i>                   | <b>5, 5'</b>  | gene <i>ariT</i> was amplified by paired primers <i>ariT-F / ariT-R</i> and cloned into pSOK-SF14p between <i>BcuI</i> and <i>EcoRI</i> site.                  |
| pSOK-albGT      | <i>albG, albT</i>             | <b>6, 6'</b>  | fragment <i>albG-albT</i> was amplified by paired primers <i>albG-F / albT-R</i> and cloned into pSOK-SF14p between <i>BcuI</i> and <i>EcoRI</i> site.         |
| pSOK-euoGT      | <i>euoG, euoT</i>             | <b>7</b>      | fragment <i>euoG-euoT</i> was amplified by paired primers <i>euoG-F / euoT-R</i> and cloned into pSOK-SF14p between <i>BcuI</i> and <i>EcoRI</i> site.         |
| pSOK-sspT       | <i>sspT</i>                   | <b>7</b>      | gene <i>sspT</i> was amplified by paired primers <i>sspT-F / sspT-R</i> and cloned into pSOK-SF14p between <i>BcuI</i> and <i>EcoRI</i> site.                  |
| pSOK-aliGTT'    | <i>aliG, aliT, aliT'</i>      | -             | fragment <i>aliG-aliT-aliT'</i> was amplified by paired primers <i>aliG-F / aliT'-R</i> and cloned into pSOK-SF14p between <i>BcuI</i> and <i>EcoRI</i> site.  |
| pSOK-xylT       | <i>xylT</i>                   | -             | gene <i>xylT</i> was amplified by paired primers <i>xylT-F / xylT-R</i> and cloned into pSOK-SF14p between <i>BcuI</i> and <i>EcoRI</i> site.                  |
| pSOK-natGT1T2   | <i>natG, natT1, natT2</i>     | <b>8</b>      | fragment <i>natG-natT1-natT2</i> was amplified by paired primers <i>natG-F / natT2-R</i> and cloned into pSOK-SF14p between <i>BcuI</i> and <i>EcoRI</i> site. |
| pSOK-spgT1T2    | <i>spgT1, spgT2</i>           | <b>9</b>      | fragment <i>spgT1-spgT2</i> was amplified by paired primers <i>spgT1-F / spgT2-R</i> and cloned into pSOK-SF14p between <i>BcuI</i> and <i>EcoRI</i> site.     |
| pSOK-vspT1T2    | <i>vspT1, vspT2</i>           | <b>10</b>     | fragment <i>vspT1-vspT2</i> was amplified by paired primers <i>vspT1-F / vspT2-R</i> and cloned into pSOK-SF14p between <i>BcuI</i> and <i>EcoRI</i> site.     |
| pSOK-aspT1T2    | <i>aspT1, aspT2</i>           | <b>11</b>     | fragment <i>aspT1-aspT2</i> was amplified by paired primers <i>aspT1-F / aspT2-R</i> and cloned into pSOK-SF14p between <i>BcuI</i> and <i>EcoRI</i> site.     |
| pSOK-fraT1T2G   | <i>fraT1, fraT2, fraG</i>     | <b>10</b>     | fragment <i>fraT1-fraT2-fraG</i> was amplified by paired primers <i>fraT1-F / fraG-R</i> and cloned into pSOK-SF14p between <i>BcuI</i> and <i>EcoRI</i> site. |
| pSOK-eurTP      | <i>eurT, eurP</i>             | <b>2a</b>     | fragment <i>eurT-eurP</i> was amplified by paired primers <i>eurT-F / eurP-R</i> and cloned into pSOK-SF14p between <i>BcuI</i> and <i>EcoRI</i> site.         |
| pSOK-netOTAP    | <i>netO, netT, netA, netP</i> | <b>3a, 3b</b> | fragment netOTAP was amplified by paired primers <i>netO-F / netP-R</i> and cloned into pSOK-SF14p between <i>BcuI</i> and <i>EcoRI</i> site.                  |
| pSOK-netOT      | <i>netO, netT</i>             | <b>3c, 3d</b> | fragment netOT was amplified by paired primers <i>netO-F / netT-R</i> and cloned into pSOK-SF14p between <i>BcuI</i> and <i>EcoRI</i> site.                    |

|                  |                                       |                           |                                                                                                                                                                                                                            |
|------------------|---------------------------------------|---------------------------|----------------------------------------------------------------------------------------------------------------------------------------------------------------------------------------------------------------------------|
| pSOK-netTP       | <i>netT, netP</i>                     | <b>3e</b>                 | fragment netT was amplified by paired primers netT-F / netT-R2, fragment netP was amplified by paired primers netP-F / netP-R, both of them were cloned into pSOK-SF14p between <i>BcuI</i> and <i>EcoRI</i> site.         |
| pSOK-netTA       | <i>netT, netA</i>                     | -                         | fragment netTA was amplified by paired primers netT-F / netA-R and cloned into pSOK-SF14p between <i>BcuI</i> and <i>EcoRI</i> site.                                                                                       |
| pSOK-morGTP      | <i>morG, morT, morP</i>               | <b>4a</b>                 | fragment morG-morT-morP was amplified by paired primers morG-F / morP-R and cloned into pSOK-SF14p between <i>BcuI</i> and <i>EcoRI</i> site.                                                                              |
| pSOK-ariP1TP2P3  | <i>ariP1, ariT, ariP2, ariP3</i>      | <b>5a</b>                 | fragment ariP1TP2P3 was amplified by paired primers ariP1-F / ariP3-R and cloned into pSOK-SF14p between <i>BcuI</i> and <i>EcoRI</i> site.                                                                                |
| pSOK-albGTUP1P2  | <i>albG, albT, albU, albP1, albP2</i> | <b>6a, 6b</b>             | fragment albGTUP1P2 was amplified by paired primers albG-F / ariP2-R and cloned into pSOK-SF14p between <i>BcuI</i> and <i>EcoRI</i> site.                                                                                 |
| pSOK-albGTUP1    | <i>albG, albT, albU, albP1</i>        | <b>6a, 6b</b>             | fragment albGTUP1 was amplified by paired primers albG-F / albP1-R and cloned into pSOK-SF14p between <i>BcuI</i> and <i>EcoRI</i> site.                                                                                   |
| pSOK-albGTUP2    | <i>albG, albT, albU, albP2</i>        | -                         | fragment albGTU was amplified by paired primers albG-F / albU-R, fragment albP was amplified by paired primers albP2-F / albP2-R, both of them were cloned into pSOK-SF14p between <i>BcuI</i> and <i>EcoRI</i> site.      |
| pSOK-euoGTD      | <i>euoG, euoT, euoD</i>               | <b>7</b>                  | fragment euoG-euoT-euoD was amplified by paired primers euoG-F / euoD-R and cloned into pSOK-SF14p between <i>BcuI</i> and <i>EcoRI</i> site.                                                                              |
| pSOK-sspGTM      | <i>sspG, sspT, sspM</i>               | <b>7</b>                  | fragment sspG-sspT-sspM was amplified by paired primers sspG-F / sspM-R and cloned into pSOK-SF14p between <i>BcuI</i> and <i>EcoRI</i> site.                                                                              |
| pSOK-spgPT1T2    | <i>spgP, spgT1, spgT2</i>             | <b>9a</b>                 | fragment spgP-spgT1-spgT2 was amplified by paired primers spgP-F / spgT2-R and cloned into pSOK-SF14p between <i>BcuI</i> and <i>EcoRI</i> site.                                                                           |
| pSOK-vspPT1T2    | <i>vspP, vspT1, vspT2</i>             | <b>10a, 10b, 10c, 10d</b> | fragment vspP-vspT1-vspT2 was amplified by paired primers vspP-F / vspT2-R and cloned into pSOK-SF14p between <i>BcuI</i> and <i>EcoRI</i> site.                                                                           |
| pSOK-aspP1P2T1T2 | <i>aspP1, aspP2, aspT1, aspT2</i>     | <b>11a, 11b</b>           | fragment aspP1P2T1T2 was amplified by paired primers aspP1-F / aspT2-R and cloned into pSOK-SF14p between <i>BcuI</i> and <i>EcoRI</i> site.                                                                               |
| pSOK-aspP2T1T2   | <i>aspP2, aspT1, aspT2</i>            | <b>11c</b>                | fragment aspP2T1T2 was amplified by paired primers aspP2-F / aspT2-R and cloned into pSOK-SF14p between <i>BcuI</i> and <i>EcoRI</i> site.                                                                                 |
| pSOK-aspP1T1T2   | <i>aspP1, aspT1, aspT2</i>            | -                         | fragment aspP1 was amplified by paired primers aspP1-F / aspP1-R, fragment aspT1T2 was amplified by paired primers aspT1-F2 / aspP2-R, both of them were cloned into pSOK-SF14p between <i>BcuI</i> and <i>EcoRI</i> site. |
| pSOK-fraT1T2GP   | <i>fraT1, fraT2, fraG, fraP</i>       | <b>12a, 12b, 12c</b>      | fragment fraT1T2GP was amplified by paired primers fraT1-F / fraP-R and cloned into pSOK-SF14p between <i>BcuI</i> and <i>EcoRI</i> site.                                                                                  |

**Table S5** Primers and oligonucleotides were used in this study.

| Primer name | Sequence (5' to 3')                                                                              |
|-------------|--------------------------------------------------------------------------------------------------|
| SF14p-F     | AGCTTGGGCTGCAGGTGCGACTCTAGAGCCTTGACCTTGATGAGGCGGCGTGAGCTACAATCAATACTCGATTAGGGATCCACGTCATATGACGTA |
| SF14p-R     | CTAGTACGTCATATGACGTGGATCCCTAATCGAGTATTGATTGTAGCTCACGCCGCTCATCAAGGTC AAGGCTCTAGAGTCGACCTGCAGCCCA  |
| crtEIB-F    | GATCCACGTCATATGACGTACTAGTACGACGAGAGGAACCGGGAT                                                    |
| crtEIB-R    | CAGCTATGACATGATTACGAATTCGGGTCATGCGACCTCCTCATGTG                                                  |
| kasOp*-F    | ACGCCTCATGGAGGGCGCGAAGCTTGGGCTGCAGGTGCGACTCTAGA                                                  |
| kasOp*-R    | ATCCCGGTTCTCTCGTCGTAAGTACGTATGCATGCAGCATCG                                                       |
| ermEp-F     | TACGCCTCATGGAGGGCGCGAAGCTTGAAGCAGCTCCAGCCTACA                                                    |
| ermEp-R     | TCCCGGTTCTCTCGTCGTAAGTACGTATGCATGCAGCATCG                                                        |
| SF14p-F2    | AGCTTGGGCTGCAGGTGCGACTCTAGA                                                                      |
| crtE-R      | CGGTATCCCCTTTCAGATACTCATCGGGAGGCCCTC                                                             |

ptlB-F GTATCTGAAAGGGGATACGCAATGACCGTGACCCCGGAGTC  
 ptlB-R CAGCTATGACATGATTACCTCGAGTCAGACCTCCCGGTCCACGACGA  
 argT-F GATCCACGTCATATGACGTAAGTCTCGGAGGAGTTCTTTTCGGC  
 argT-R CAGCTATGACATGATTACGAATTCCTACTCAGATGAAGTCCCACCACC  
 eurT-F GGATCCACGTCATATGACGTAAGTCTCGGAGGAGTTCTTTTCGGC  
 eurT-R CAGCTATGACATGATTACGAATTCATTTCTTACTGAGGCCCC  
 eurP-R CAGCTATGACATGATTACGAATTCATCAACCGTGCGCCGAAGCT  
 netT-F CGATGCTGCATGCATACGTAAGTCTCGGAGGAGTTCTTTTCGGC  
 netT-R CAGCTATGACATGATTACGAATTCCTCGGATGACGTTCCCTT  
 netO-F CGATGCTGCATGCATACGTAAGTCTCGGAGGAGTTCTTTTCGGC  
 netT-R2 TGAGTGGTGCCTCGCAGTACCGGGCATGACGTTCCCTT  
 netA-R CAGCTATGACATGATTACGAATTCGAGGTGATGAAGGGCAGTGG  
 netP-F AAGGGAACACGTCATGCCCGTACTGCGAGGCACCACTCA  
 netP-R CAGCTATGACATGATTACGAATTCACATCGCGAACAGCCAGGCA  
 forT-F GATCCACGTCATATGACGTAAGTCTCGGAGGAGTTCTTTTCGGC  
 forT-R CAGCTATGACATGATTACGAATTCAGTCCAACCTCGCCTCAGA  
 morG-F GATCCACGTCATATGACGTAAGTCTCGGAGGAGTTCTTTTCGGC  
 morT-R CAGCTATGACATGATTACGAATTCCTACGGATCGGTGGGTTCAGT  
 morP-R CAGCTATGACATGATTACGAATTCCTCGACAGGGGCCTGTCAT  
 ariT-F GATCCACGTCATATGACGTAAGTCTCGGAGGAGTTCTTTTCGGC  
 ariT-R CAGCTATGACATGATTACGAATTCGGTGAGGAACAGCGTGGACAT  
 ariP1-F GATCCACGTCATATGACGTAAGTCTCGGAGGAGTTCTTTTCGGC  
 ariP3-R CAGCTATGACATGATTACGAATTCATGGGTTCATCCCGGTGTC  
 albG-F GGATCCACGTCATATGACGTAAGTCTCGGAGGAGTTCTTTTCGGC  
 albT-R CAGCTATGACATGATTACGAATTCGACCCATCGGAATCCCCTT  
 albU-R AGGGGTCAGTGGACCGTTTCTCAATTCCTGCTGCCTGGC  
 albP1-R CAGCTATGACATGATTACGAATTCCTAGTGGACCGTTTCGAGGG  
 albP2-F GCCAGGCAGCACGGAATTGAGAAACGGTCCACTGACCCCT  
 albP2-R CAGCTATGACATGATTACGAATTCACCAAAAAGTGGGGCGCC  
 euoG-F GATCCACGTCATATGACGTAAGTCTCGGAGGAGTTCTTTTCGGC  
 euoT-R CAGCTATGACATGATTACGAATTCCTCATGTGCTTCCCGGTACG  
 euoD-R CAGCTATGACATGATTACGAATTCCTCAACGAGGGCTTAGCTT  
 sspM-F GATCCACGTCATATGACGTAAGTCTCGGAGGAGTTCTTTTCGGC  
 sspT-F GATCCACGTCATATGACGTAAGTCTCGGAGGAGTTCTTTTCGGC  
 sspT-R CAGCTATGACATGATTACGAATTCCTAGTCCGCGGACTTCCAGT  
 aliG-F GATCCACGTCATATGACGTAAGTCTCGGAGGAGTTCTTTTCGGC  
 aliT-R CAGCTATGACATGATTACGAATTCGGAGGGTATGTGGGTGCC  
 xylT-F GATCCACGTCATATGACGTAAGTCTCGGAGGAGTTCTTTTCGGC  
 xylT-R CAGCTATGACATGATTACGAATTCCTTACGGTGTGGCCACCA  
 natG-F GATCCACGTCATATGACGTAAGTCTCGGAGGAGTTCTTTTCGGC  
 natT2-R CAGCTATGACATGATTACGAATTCCTCAGGCTCCTGGGTGTGGTT  
 spgT1-F GATCCACGTCATATGACGTAAGTCTCGGAGGAGTTCTTTTCGGC

|          |                                                  |
|----------|--------------------------------------------------|
| spgT2-R  | CAGCTATGACATGATTACGAATTCGGTGAAAATCCGGCGAATG      |
| spgP-F   | GATCCACGTCATATGACGTACTAGTTCACGTCGCGCAGATTCACG    |
| vspT1-F  | GATCCACGTCATATGACGTACTAGTGGTCGAGGTGGTCCTGCG      |
| vspT2-R  | CAGCTATGACATGATTACGAATTCGCACGCTAACAGCGTCACC      |
| vspP-F   | GATCCACGTCATATGACGTACTAGTCGAAGAGTAACGCCCCTCAC    |
| aspT1-F  | GATCCACGTCATATGACGTACTAGTGAGCACGAGCTGCGGAT       |
| aspT2-R  | CAGCTATGACATGATTACGAATTCGTTTGCCGCTTTACGTCCTT     |
| aspP1-F  | GATCCACGTCATATGACGTACTAGTCGCAAGCCCGGCAACGCGAT    |
| aspP2-F  | GATCCACGTCATATGACGTACTAGTATCGAGCGCAAGCCCGGCAA    |
| aspT1-F2 | GCTGAATGTCCGTCCTCACCATGCGCCTCGTCCCGATCGA         |
| aspP1-R  | GGATCCACGTCATATGACGTACTAGTAAGGGATCTCCGTCCGATGGCC |
| fraT1-F  | GATCCACGTCATATGACGTACTAGTGAGCACACCGACTGGAGTTC    |
| fraG-R   | CAGCTATGACATGATTACGAATTCTCGTCCCACCTTCTCGTCGA     |
| fraP-R   | CAGCTATGACATGATTACGAATTCCTTCGTCCGGACGTCGGGTC     |

---

**Table S6**  $^1\text{H}$  NMR (400 MHz) and  $^{13}\text{C}$  NMR (100 MHz) assignments for **2** in  $\text{CDCl}_3$ .

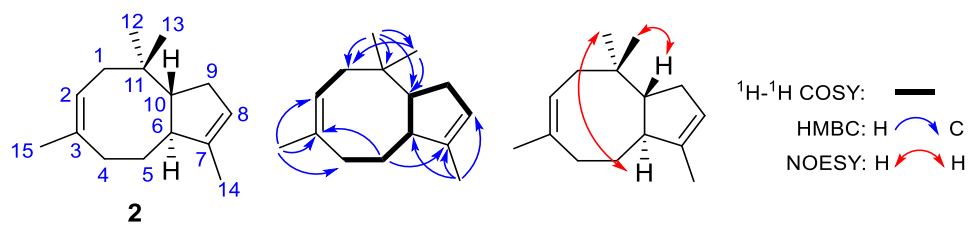

| Position | $\delta_{\text{C}}$ , type | $\delta_{\text{H}}$ (mult, $J$ in Hz) |
|----------|----------------------------|---------------------------------------|
| 1        | 37.2, $\text{CH}_2$        | 2.22 (1H, m)<br>2.05 (1H, m)          |
| 2        | 122.3, CH                  | 5.35 (1H, t, $J = 5.4$ )              |
| 3        | 138.6, C                   |                                       |
| 4        | 32.4, $\text{CH}_2$        | 2.34 (1H, m)<br>1.96 (1H, m)          |
| 5        | 31.7, $\text{CH}_2$        | 1.98 (1H, m)<br>0.99 (1H, m)          |
| 6        | 52.4, CH                   | 2.35 (1H, m)                          |
| 7        | 142.6, C                   |                                       |
| 8        | 123.5, CH                  | 5.18 (1H, m)                          |
| 9        | 33.9, $\text{CH}_2$        | 2.21 (1H, m)<br>2.10 (1H, m)          |
| 10       | 49.9, CH                   | 2.13 (1H, m)                          |
| 11       | 41.1, C                    |                                       |
| 12       | 23.6, $\text{CH}_3$        | 0.77 (3H, s)                          |
| 13       | 19.9, $\text{CH}_3$        | 0.84 (3H, s)                          |
| 14       | 15.2, $\text{CH}_3$        | 1.61 (3H, s)                          |
| 15       | 25.0, $\text{CH}_3$        | 1.75 (3H, s)                          |



**Table S7**  $^1\text{H}$  NMR (400 MHz) and  $^{13}\text{C}$  NMR (100 MHz) assignments for **5'** in  $\text{CDCl}_3$ .

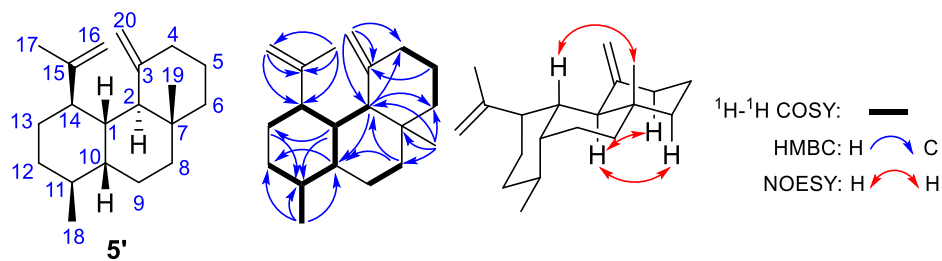

| Position | $\delta_c$ , type      | $\delta_H$ (mult, $J$ in Hz)   |
|----------|------------------------|--------------------------------|
| 1        | 34.1, CH               | 2.16 (1H, m)                   |
| 2        | 49.1, CH               | 2.32 (1H, d, $J = 12.1$ )      |
| 3        | 148.9, C               |                                |
| 4        | 39.4, CH <sub>2</sub>  | 2.28 (1H, m)<br>1.97 (1H, m)   |
| 5        | 25.2, CH <sub>2</sub>  | 1.64 (2H, m)                   |
| 6        | 42.9, CH <sub>2</sub>  | 1.38 (2H, m)                   |
| 7        | 37.9, C                |                                |
| 8        | 35.5, CH <sub>2</sub>  | 1.43 (1H, m)<br>1.15 (1H, m)   |
| 9        | 23.0, CH <sub>2</sub>  | 1.54 (2H, m)                   |
| 10       | 39.2, CH               | 1.55 (2H, m)                   |
| 11       | 28.6, CH               | 1.82 (1H, m)                   |
| 12       | 31.3, CH <sub>2</sub>  | 1.41 (1H, m)<br>1.10 (1H, m)   |
| 13       | 24.0, CH <sub>2</sub>  | 1.67 (2H, m)                   |
| 14       | 39.7, CH               | 2.68 (1H, m)                   |
| 15       | 148.2, C               |                                |
| 16       | 110.3, CH <sub>2</sub> | 4.91 (1H, br)<br>4.85 (1H, br) |
| 17       | 23.4, CH <sub>3</sub>  | 1.74 (3H, s)                   |
| 18       | 20.5, CH <sub>3</sub>  | 0.82 (3H, d, $J = 6.3$ )       |
| 19       | 18.1, CH <sub>3</sub>  | 0.82 (3H, s)                   |
| 20       | 107.0, CH <sub>2</sub> | 4.87 (1H, br)<br>4.32 (1H, br) |

**Table S8**  $^1\text{H}$  NMR (400 MHz) and  $^{13}\text{C}$  NMR (100 MHz) assignments for **6'** in  $\text{CDCl}_3$ .

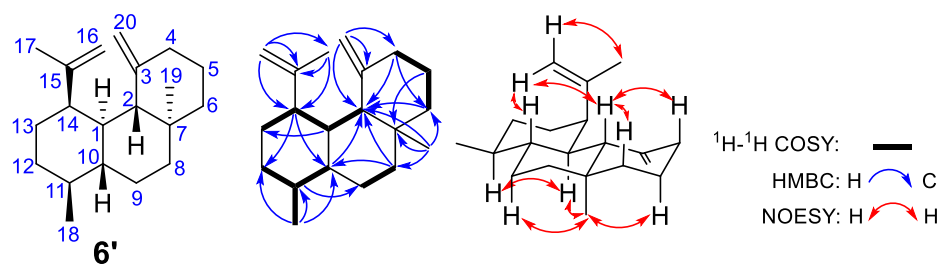

| Position | $\delta_{\text{C}}$ , type | $\delta_{\text{H}}$ (mult, $J$ in Hz) |
|----------|----------------------------|---------------------------------------|
| 1        | 40.9, CH                   | 1.50 (1H, m)                          |
| 2        | 52.3, CH                   | 1.89 (1H, d, $J = 11.1$ )             |
| 3        | 149.3, C                   |                                       |
| 4        | 39.2, $\text{CH}_2$        | 2.22 (1H, m)<br>1.89 (1H, m)          |
| 5        | 25.3, $\text{CH}_2$        | 1.61 (2H, m)                          |
| 6        | 42.7, C                    | 1.34 (1H, m)<br>1.27 (1H, m)          |
| 7        | 36.9, C                    | 2.84 (1H, m)                          |
| 8        | 41.4, $\text{CH}_2$        | 1.46 (1H, m)<br>1.16 (1H, m)          |
| 9        | 25.6, $\text{CH}_2$        | 1.01 (2H, m)                          |
| 10       | 43.0, CH                   | 1.34 (1H, m)                          |
| 11       | 38.4, CH                   | 1.18 (1H, m)                          |
| 12       | 31.6, $\text{CH}_2$        | 1.47 (1H, m)<br>1.36 (1H, m)          |
| 13       | 30.7, $\text{CH}_2$        | 1.70 (1H, m)<br>1.61 (1H, m)          |
| 14       | 39.6, CH                   | 2.92 (1H, m)                          |
| 15       | 148.5, C                   |                                       |
| 16       | 113.1, $\text{CH}_2$       | 4.83 (1H, brs)<br>4.79 (1H, brs)      |
| 17       | 26.9, $\text{CH}_3$        | 1.73 (3H, s)                          |
| 18       | 20.4, $\text{CH}_3$        | 0.91 (3H, d, $J = 6.3$ )              |
| 19       | 17.9, $\text{CH}_3$        | 0.74 (3H, s)                          |
| 20       | 106.7, $\text{CH}_2$       | 4.88 (1H, brs)<br>4.40 (1H, brs)      |

**Table S9**  $^1\text{H}$  NMR (400 MHz) and  $^{13}\text{C}$  NMR (100 MHz) assignments for **6** in  $\text{C}_6\text{D}_6$ .

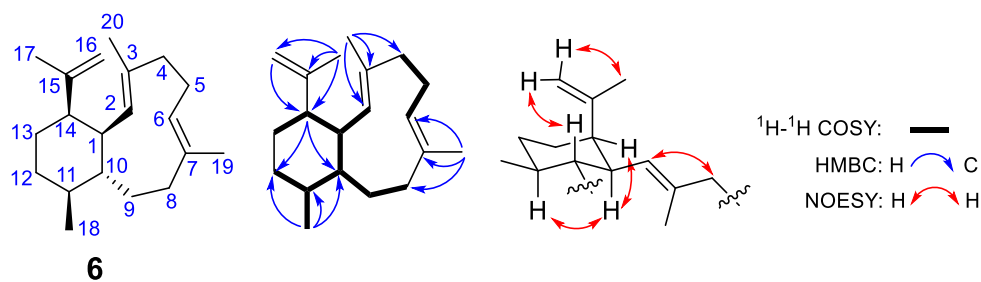

| Position | $\delta_{\text{C}}$ , type | $\delta_{\text{H}}$ (mult, $J$ in Hz) |
|----------|----------------------------|---------------------------------------|
| 1        | 46.6, CH                   | 2.08 (1H, m)                          |
| 2        | 135.8, CH                  | 4.82 (1H, br)                         |
| 3        | 132.4, C                   |                                       |
| 4        | 40.0, $\text{CH}_2$        | 2.07 (1H, m)<br>1.94 (1H, m)          |
| 5        | 26.3, $\text{CH}_2$        | 2.20 (1H, m)<br>2.02 (1H, m)          |
| 6        | 126.8, CH                  | 4.80 (1H, m)                          |
| 7        | 130.8, C                   |                                       |
| 8        | 41.7, $\text{CH}_2$        | 2.35 (1H, m)<br>1.99 (1H, m)          |
| 9        | 35.0, $\text{CH}_2$        | 1.82 (2H, m)                          |
| 10       | 49.8, CH                   | 1.14 (1H, m)                          |
| 11       | 36.9, CH                   | 1.11 (1H, m)                          |
| 12       | 30.2, $\text{CH}_2$        | 1.64 (1H, m)<br>1.31 (1H, m)          |
| 13       | 28.0, $\text{CH}_2$        | 1.65 (1H, m)<br>1.45 (1H, m)          |
| 14       | 45.9, CH                   | 2.30 (1H, m)                          |
| 15       | 147.2, C                   |                                       |
| 16       | 112.5, CH                  | 4.99 (1H, br)<br>4.87 (1H, br)        |
| 17       | 25.8, $\text{CH}_3$        | 1.68 (3H, s)                          |
| 18       | 21.8, $\text{CH}_3$        | 0.98 (3H, d, $J = 5.5$ )              |
| 19       | 16.5, $\text{CH}_3$        | 1.45 (3H, s)                          |
| 20       | 30.5, $\text{CH}_3$        | 1.45 (3H, s)                          |

**Table S10**  $^1\text{H}$  NMR (400 MHz) and  $^{13}\text{C}$  NMR (100 MHz) assignments for **8** in  $\text{CDCl}_3$ .

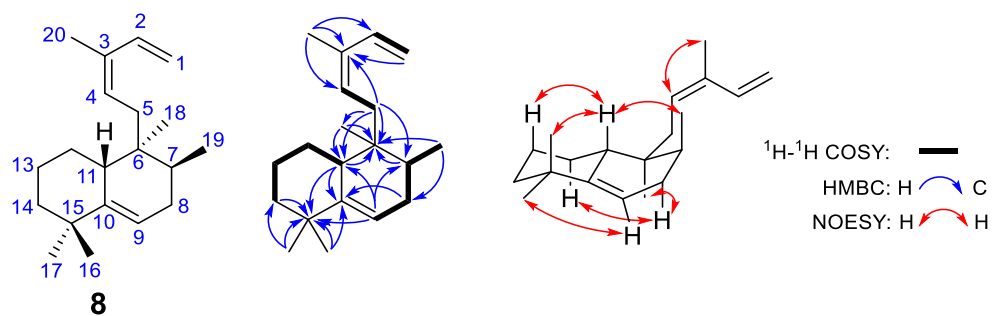

| Position | $\delta_{\text{C}}$ , type | $\delta_{\text{H}}$ (mult, $J$ in Hz)                              |
|----------|----------------------------|--------------------------------------------------------------------|
| 1        | 113.0, $\text{CH}_2$       | 5.20 (1H, dd, $J = 17.2, 1.0$ )<br>5.07 (1H, dd, $J = 10.8, 1.0$ ) |
| 2        | 134.4, CH                  | 6.79 (1H, dd, $J = 10.8, 17.2$ )                                   |
| 3        | 133.7, C                   |                                                                    |
| 4        | 128.4, CH                  | 5.50 (1H, t, $J = 7.9$ )                                           |
| 5        | 40.0, $\text{CH}_2$        | 2.34 (1H, dd, $J = 7.9, 14.1$ )<br>1.97 (1H, m)                    |
| 6        | 37.5, C                    |                                                                    |
| 7        | 33.2, CH                   | 1.64 (1H, m)                                                       |
| 8        | 31.5, $\text{CH}_2$        | 2.08 (1H, m)<br>1.79 (1H, m)                                       |
| 9        | 114.9, CH                  | 5.39 (1H, t, $J = 3.5$ )                                           |
| 10       | 147.2, C                   |                                                                    |
| 11       | 41.4, CH                   | 2.04 (1H, m)                                                       |
| 12       | 29.9, $\text{CH}_2$        | 1.80 (2H, m)                                                       |
| 13       | 23.1, $\text{CH}_2$        | 1.64 (1H, m)<br>0.92 (1H, m)                                       |
| 14       | 42.7, $\text{CH}_2$        | 1.48 (1H, m)<br>1.21 (1H, m)                                       |
| 15       | 36.9, C                    |                                                                    |
| 16       | 29.7, $\text{CH}_3$        | 1.09 (3H, s)                                                       |
| 17       | 26.6, $\text{CH}_3$        | 1.03 (3H, s)                                                       |
| 18       | 22.8, $\text{CH}_3$        | 0.90 (3H, s)                                                       |
| 19       | 15.0, $\text{CH}_3$        | 0.87 (3H, d, $J = 6.8$ )                                           |
| 20       | 20.5, $\text{CH}_3$        | 1.89 (3H, s)                                                       |

**Table S11**  $^1\text{H}$  NMR (400 MHz) and  $^{13}\text{C}$  NMR (100 MHz) assignments for **2a** in  $\text{CDCl}_3$ .

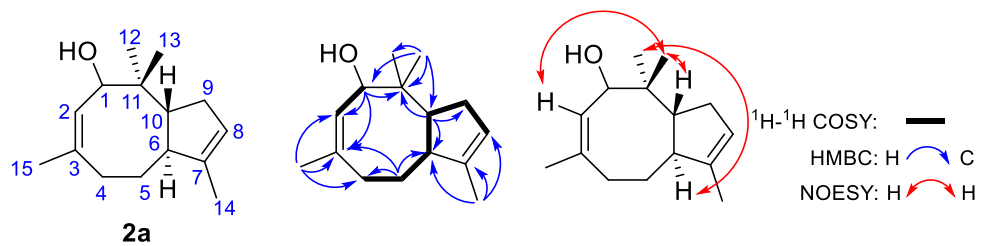

| Position | $\delta_{\text{C}}$ , type | $\delta_{\text{H}}$ (mult, $J$ in Hz) |
|----------|----------------------------|---------------------------------------|
| 1        | 75.7, CH                   | 4.26 (1H, d, $J = 8.7$ )              |
| 2        | 126.4, CH                  | 5.22 (1H, d, $J = 8.7$ )              |
| 3        | 138.3, C                   |                                       |
| 4        | 33.3, $\text{CH}_2$        | 2.35 (1H, m)<br>2.00 (1H, m)          |
| 5        | 32.0, $\text{CH}_2$        | 0.94 (1H, m)<br>2.00 (1H, m)          |
| 6        | 51.3, CH                   | 2.33 (1H, m)                          |
| 7        | 142.1, C                   |                                       |
| 8        | 123.6, CH                  | 5.21 (1H, m)                          |
| 9        | 34.1, $\text{CH}_2$        | 2.13 (1H, m)<br>2.26 (1H, m)          |
| 10       | 50.6, CH                   | 2.06 (1H, dt, $J = 10.0, 6.1$ )       |
| 11       | 41.3, C                    |                                       |
| 12       | 18.3, $\text{CH}_3$        | 0.89 (3H, s)                          |
| 13       | 19.4, $\text{CH}_3$        | 0.79 (3H, s)                          |
| 14       | 15.2, $\text{CH}_3$        | 1.62 (3H, s)                          |
| 15       | 25.1, $\text{CH}_3$        | 1.78 (3H, s)                          |

**Table S12**  $^1\text{H}$  NMR (400 MHz) and  $^{13}\text{C}$  NMR (100 MHz) assignments for **3a** in methanol- $d_4$ .

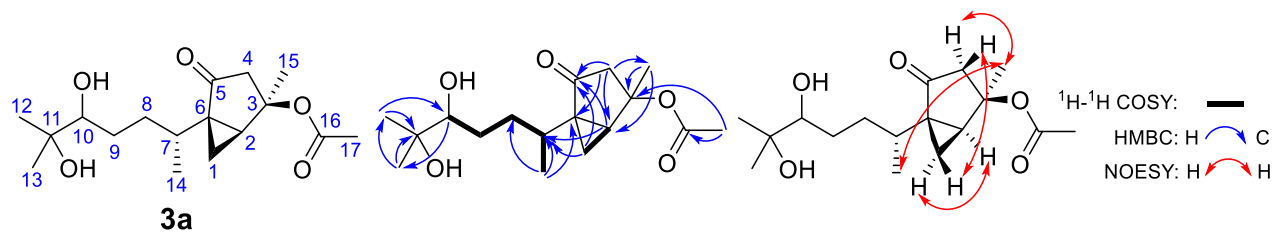

| Position | $\delta_{\text{C}}$ , type | $\delta_{\text{H}}$ (mult, $J$ in Hz)                |
|----------|----------------------------|------------------------------------------------------|
| 1        | 18.5, CH <sub>2</sub>      | 1.39 (1H, dd, $J = 5.3, 4.4$ )<br>1.26 (1H, m)       |
| 2        | 37.6, CH                   | 2.43 (1H, dd, $J = 7.7, 4.4$ )                       |
| 3        | 81.6, C                    |                                                      |
| 4        | 48.5, CH <sub>2</sub>      | 2.62(1H, d, $J = 18.2$ )<br>2.30(1H, d, $J = 18.2$ ) |
| 5        | 211.6, C                   |                                                      |
| 6        | 46.1, C                    |                                                      |
| 7        | 33.9, CH                   | 1.58 (1H, m)                                         |
| 8        | 32.5, CH <sub>2</sub>      | 1.67 (1H, m)<br>1.56 (1H, m)                         |
| 9        | 30.4, CH <sub>2</sub>      | 1.56 (1H, m)<br>1.31 (1H, m)                         |
| 10       | 79.4, CH                   | 3.21 (1H, dd, $J = 10.5, 1.4$ )                      |
| 11       | 73.8, C                    |                                                      |
| 12       | 25.7, CH <sub>3</sub>      | 1.15 (3H, s)                                         |
| 13       | 24.9, CH <sub>3</sub>      | 1.12 (3H, s)                                         |
| 14       | 17.3, CH <sub>3</sub>      | 0.97 (3H, d, $J = 6.6$ )                             |
| 15       | 25.9, CH <sub>3</sub>      | 1.65 (3H, s)                                         |
| 16       | 172.3, C                   |                                                      |
| 17       | 21.6, CH <sub>3</sub>      | 2.00 (3H, s)                                         |

**Table S13**  $^1\text{H}$  NMR (400 MHz) and  $^{13}\text{C}$  NMR (100 MHz) assignments for **3b** in methanol- $d_4$ .

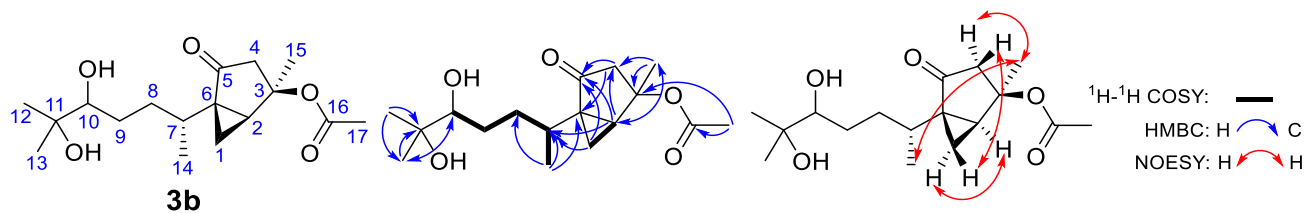

| Position | $\delta_{\text{C}}$ , type | $\delta_{\text{H}}$ (mult, $J$ in Hz)                   |
|----------|----------------------------|---------------------------------------------------------|
| 1        | 18.5, CH <sub>2</sub>      | 1.40 (1H, dd, $J = 5.1, 4.3$ )<br>1.28 (1H, m)          |
| 2        | 37.8, CH                   | 2.45 (1H, dd, $J = 7.7, 4.3$ )                          |
| 3        | 81.6, C                    |                                                         |
| 4        | 48.5, CH <sub>2</sub>      | 2.62 (1H, d, $J = 18.2$ ),<br>2.30 (1H, d, $J = 18.2$ ) |
| 5        | 211.5, C                   |                                                         |
| 6        | 46.1, C                    |                                                         |
| 7        | 34.3, CH                   | 1.57 (1H, m)                                            |
| 8        | 32.6, CH <sub>2</sub>      | 1.84 (1H, m)<br>1.38 (1H, m)                            |
| 9        | 30.7, CH <sub>2</sub>      | 1.70 (1H, m)<br>1.20 (1H, m)                            |
| 10       | 79.9, CH                   | 3.20 (1H, dd, $J = 10.5, 1.8$ )                         |
| 11       | 73.8, C                    |                                                         |
| 12       | 25.8, CH <sub>3</sub>      | 1.15 (3H, s)                                            |
| 13       | 24.8, CH <sub>3</sub>      | 1.12 (3H, s)                                            |
| 14       | 17.7, CH <sub>3</sub>      | 0.99 (3H, d, $J = 6.9$ )                                |
| 15       | 25.9, CH <sub>3</sub>      | 1.65 (3H, s)                                            |
| 16       | 172.3, C                   |                                                         |
| 17       | 21.6, CH <sub>3</sub>      | 2.00 (3H, s)                                            |

**Table S14**  $^1\text{H}$  NMR (400 MHz) and  $^{13}\text{C}$  NMR (100 MHz) assignments for **3c** in methanol- $d_4$ .

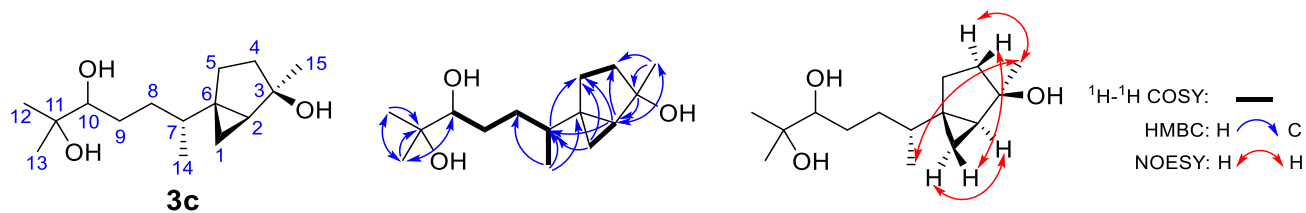

| Position | $\delta_{\text{C}}$ , type | $\delta_{\text{H}}$ (mult, $J$ in Hz)          |
|----------|----------------------------|------------------------------------------------|
| 1        | 14.3, CH <sub>2</sub>      | 0.80 (1H, m)<br>0.36 (1H, dd, $J = 5.2, 7.7$ ) |
| 2        | 33.9, CH                   | 0.97 (1H, m)                                   |
| 3        | 79.8, C                    |                                                |
| 4        | 36.4, CH <sub>2</sub>      | 1.42 (2H, m),                                  |
|          | 25.5, CH <sub>2</sub>      | 1.67 (1H, m)                                   |
| 5        |                            | 1.58 (1H, m)                                   |
| 6        | 33.3, C                    |                                                |
| 7        | 39.7, CH                   | 1.08 (1H, m)                                   |
| 8        | 33.2, CH <sub>2</sub>      | 1.46 (2H, m)                                   |
| 9        | 26.9, CH <sub>2</sub>      | 1.68 (2H, m)                                   |
| 10       | 79.8, CH                   | 3.21 (1H, dd, $J = 1.4, 10.3$ )                |
| 11       | 73.8, C                    |                                                |
| 12       | 25.7, CH <sub>3</sub>      | 1.16 (3H, s)                                   |
| 13       | 24.9, CH <sub>3</sub>      | 1.13 (3H, s)                                   |
| 14       | 17.8, CH <sub>3</sub>      | 0.97 (3H, d, $J = 6.7$ )                       |
| 15       | 28.6, CH <sub>3</sub>      | 1.30 (3H, s)                                   |



**Table S15**  $^1\text{H}$  NMR (400 MHz) and  $^{13}\text{C}$  NMR (100 MHz) assignments for **3e** in methanol- $d_4$ .

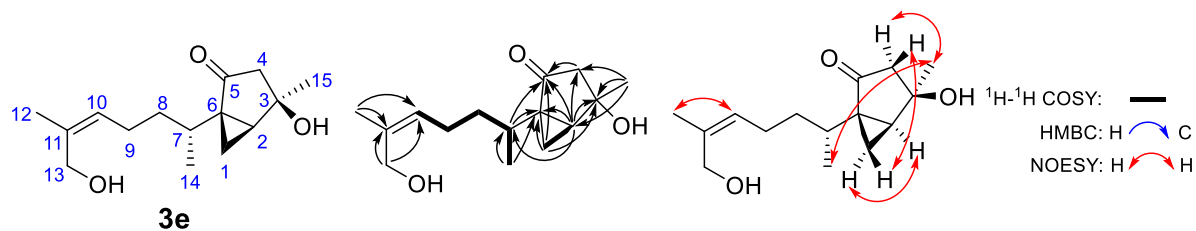

| Position | $\delta_{\text{C}}$ , type | $\delta_{\text{H}}$ (mult, $J$ in Hz)                |
|----------|----------------------------|------------------------------------------------------|
| 1        | 18.9, CH <sub>2</sub>      | 1.42 (1H, m)<br>1.20 (1H, ddd, $J = 1.5, 5.3, 7.1$ ) |
| 2        | 39.3, CH                   | 1.99 (1H, m)                                         |
| 3        | 72.3, C                    |                                                      |
| 4        | 49.3, CH <sub>2</sub>      | 2.39 (1H, d, $J = 17.6$ ),<br>1.97 (1H, m)           |
| 5        | 213.0, C                   |                                                      |
| 6        | 46.3, C                    |                                                      |
| 7        | 33.9, CH                   | 1.51 (1H, m)                                         |
| 8        | 35.7, CH <sub>2</sub>      | 1.58 (1H, m)<br>1.43 (1H, m)                         |
| 9        | 26.9, CH <sub>2</sub>      | 2.07 (2H, m)                                         |
| 10       | 128.7, CH                  | 5.25 (1H, t, $J = 7.2$ )                             |
| 11       | 135.8, C                   |                                                      |
| 12       | 21.5, CH <sub>3</sub>      | 1.76 (3H, s)                                         |
| 13       | 61.3, CH <sub>2</sub>      | 4.06 (2H, s)                                         |
| 14       | 17.4, CH <sub>3</sub>      | 0.96 (3H, d, $J = 6.7$ )                             |
| 15       | 29.7, CH <sub>3</sub>      | 1.40 (3H, s)                                         |

**Table S16**  $^1\text{H}$  NMR (400 MHz) and  $^{13}\text{C}$  NMR (100 MHz) assignments for **4a** in  $\text{CDCl}_3$ .

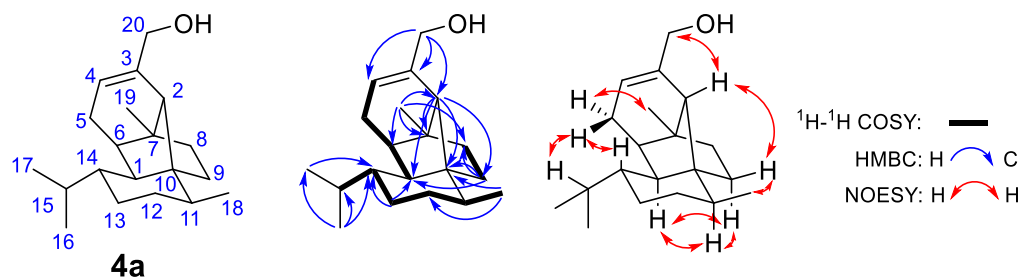

| Position | $\delta_c$ , type   | $\delta_H$ (mult, $J$ in Hz)                                       |
|----------|---------------------|--------------------------------------------------------------------|
| 1        | 47.9, CH            | 1.38 (1H, m)                                                       |
| 2        | 49.1, CH            | 1.60 (1H, s)                                                       |
| 3        | 139.9, C            |                                                                    |
| 4        | 122.2, CH           | 5.56 (1H, m)                                                       |
| 5        | 27.4, $\text{CH}_2$ | 2.14 (1H, m)<br>1.85 (1H, m)                                       |
| 6        | 45.2, CH            | 1.75 (1H, m)                                                       |
| 7        | 43.5, C             |                                                                    |
| 8        | 34.8, $\text{CH}_2$ | 1.46 (2H, m)                                                       |
| 9        | 40.5, $\text{CH}_2$ | 0.90 (1H, m)<br>1.85 (1H, m)                                       |
| 10       | 58.5, C             |                                                                    |
| 11       | 37.6, CH            | 1.41 (1H, m)                                                       |
| 12       | 31.7, $\text{CH}_2$ | 0.94 (1H, m)<br>1.41 (1H, m)                                       |
| 13       | 24.9, $\text{CH}_2$ | 1.55(1H, m)<br>0.81 (1H, m)                                        |
| 14       | 41.7, CH            | 1.39 (1H, m)                                                       |
| 15       | 30.5, CH            | 1.44 (1H, m)                                                       |
| 16       | 21.3, $\text{CH}_3$ | 0.87 (3H, d, $J = 6.8$ )                                           |
| 17       | 15.6, $\text{CH}_3$ | 0.72 (3H, d, $J = 6.8$ )                                           |
| 18       | 18.1, $\text{CH}_3$ | 1.02 (3H, d, $J = 6.8$ )                                           |
| 19       | 18.5, $\text{CH}_3$ | 0.99 (3H, s)                                                       |
| 20       | 67.1, $\text{CH}_2$ | 4.14 (1H, dd, $J = 13.3, 1.2$ )<br>4.06 (1H, dd, $J = 13.3, 1.2$ ) |

**Table S17**  $^1\text{H}$  NMR (400 MHz) and  $^{13}\text{C}$  NMR (100 MHz) assignments for **5a** in  $\text{CDCl}_3$ .

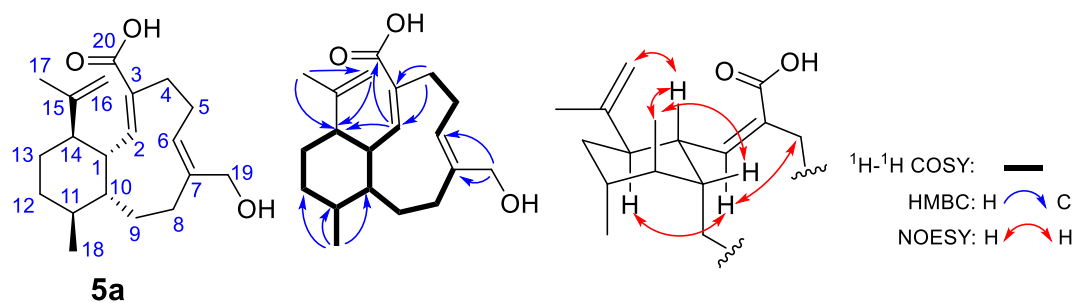

| Position | $\delta_{\text{C}}$ , type | $\delta_{\text{H}}$ (mult, $J$ in Hz)                  |
|----------|----------------------------|--------------------------------------------------------|
| 1        | 36.8, CH                   | 3.47 (1H, m)                                           |
| 2        | 158.8, CH                  | 5.78 (1H, d, $J = 11.0$ )                              |
| 3        | 127.0, C                   |                                                        |
| 4        | 34.6, $\text{CH}_2$        | 1.98 (1H, m)<br>2.78 (1H, m)                           |
| 5        | 25.2, $\text{CH}_2$        | 2.56 (1H, m)<br>2.19 (1H, m)                           |
| 6        | 131.8, CH                  | 5.15 (1H, m)                                           |
| 7        | 140.8, C                   |                                                        |
| 8        | 30.4, $\text{CH}_2$        | 2.24 (1H, m)<br>1.97 (1H, m)                           |
| 9        | 33.0, $\text{CH}_2$        | 1.71 (1H, m)<br>1.44 (1H, m)                           |
| 10       | 45.3, CH                   | 1.56 (1H, m)                                           |
| 11       | 34.4, CH                   | 1.72 (1H, m)                                           |
| 12       | 26.9, $\text{CH}_2$        | 1.71 (1H, m)<br>1.38 (1H, m)                           |
| 13       | 25.9, $\text{CH}_2$        | 1.37 (1H, m)<br>1.38 (1H, m)                           |
| 14       | 46.7, CH                   | 1.96 (1H, m)                                           |
| 15       | 149.4, C                   |                                                        |
| 16       | 110.8, $\text{CH}_2$       | 4.64 (1H, br)<br>4.68 (1H, br)                         |
| 17       | 19.1, $\text{CH}_3$        | 1.60 (3H, s)                                           |
| 18       | 18.6, $\text{CH}_3$        | 1.11 (3H, d, $J = 7.1$ )                               |
| 19       | 63.3, $\text{CH}_2$        | 4.08 (1H, d, $J = 10.8$ )<br>3.84 (1H, d, $J = 11.7$ ) |
| 20       | 172.1, C                   |                                                        |

**Table S18**  $^1\text{H}$  NMR (400 MHz) and  $^{13}\text{C}$  NMR (100 MHz) assignments for **6a** in  $\text{CDCl}_3$ .

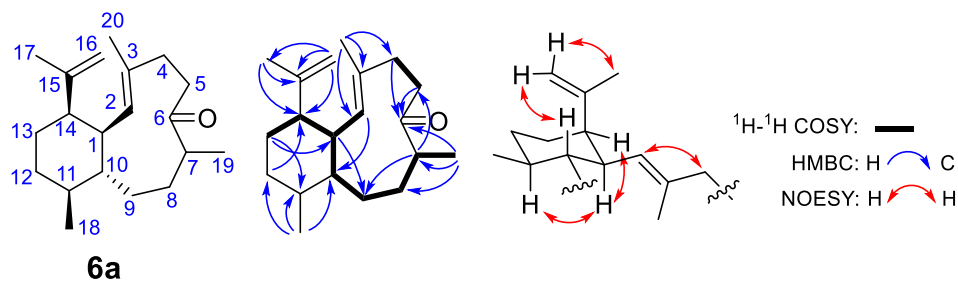

| Position | $\delta_{\text{C}}$ , type | $\delta_{\text{H}}$ (mult, $J$ in Hz)           |
|----------|----------------------------|-------------------------------------------------|
| 1        | 46.3, CH                   | 2.04 (1H, td, $J = 11.1, 5.5$ )                 |
| 2        | 130.8, CH                  | 5.39 (1H, d, $J = 11.1$ )                       |
| 3        | 133.4, C                   |                                                 |
| 4        | 33.6, $\text{CH}_2$        | 2.50 (1H, m)<br>2.28 (1H, m)                    |
| 5        | 39.5, $\text{CH}_2$        | 2.94 (1H, m)<br>2.26 (1H, m)                    |
| 6        | 217.2, C                   |                                                 |
| 7        | 46.0, CH                   | 2.84 (1H, m)                                    |
| 8        | 34.2, $\text{CH}_2$        | 1.84 (1H, m)<br>1.25 (1H, m)                    |
| 9        | 29.6, $\text{CH}_2$        | 1.25 (1H, m)<br>0.67 (1H, m)                    |
| 10       | 45.0, CH                   | 0.95 (1H, m)                                    |
| 11       | 39.0, CH                   | 1.11 (1H, m)                                    |
| 12       | 30.4, $\text{CH}_2$        | 1.41 (1H, dq, $J = 13.4, 4.1$ )<br>1.26 (1H, m) |
| 13       | 29.7, $\text{CH}_2$        | 1.67 (1H, m)<br>1.54 (1H, m)                    |
| 14       | 44.3, CH                   | 2.24 (1H, m)                                    |
| 15       | 147.4, C                   |                                                 |
| 16       | 112.6, $\text{CH}_2$       | 4.91 (1H, br)<br>4.83 (1H, br)                  |
| 17       | 26.6, $\text{CH}_3$        | 1.72 (3H, s)                                    |
| 18       | 20.8, $\text{CH}_3$        | 0.91 (3H, d, $J = 6.3$ )                        |
| 19       | 17.3, $\text{CH}_3$        | 0.93 (3H, d, $J = 7.0$ )                        |
| 20       | 18.9, $\text{CH}_3$        | 1.56 (3H, d, $J = 1.0$ )                        |

**Table S19**  $^1\text{H}$  NMR (400 MHz) and  $^{13}\text{C}$  NMR (100 MHz) assignments for **6b** in  $\text{CDCl}_3$ .

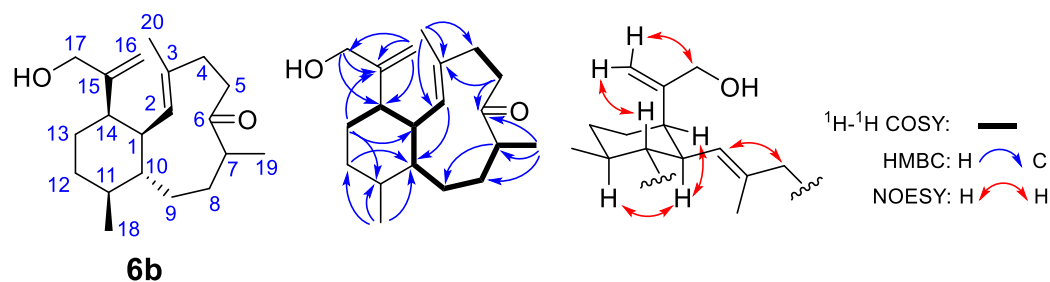

| Position | $\delta_{\text{C}}$ , type | $\delta_{\text{H}}$ (mult, $J$ in Hz) |
|----------|----------------------------|---------------------------------------|
| 1        | 45.9, CH                   | 2.06 (1H, td, $J = 11.0, 5.5$ )       |
| 2        | 130.5, CH                  | 5.29 (1H, d, $J = 11.0$ )             |
| 3        | 134.2, C                   |                                       |
| 4        | 33.6, $\text{CH}_2$        | 2.47 (1H, m)<br>2.28 (1H, m)          |
| 5        | 39.5, $\text{CH}_2$        | 2.93 (1H, m)<br>2.24 (1H, m)          |
| 6        | 217.2, C                   |                                       |
| 7        | 45.9, CH                   | 2.84 (1H, m)                          |
| 8        | 34.3, $\text{CH}_2$        | 1.86 (1H, m)<br>1.25 (1H, m)          |
| 9        | 29.7, $\text{CH}_2$        | 1.25 (1H, m)<br>0.69 (1H, m)          |
| 10       | 45.5, CH                   | 0.92 (1H, m)                          |
| 11       | 38.9, CH                   | 1.11 (1H, m)                          |
| 12       | 30.2, $\text{CH}_2$        | 1.45 (1H, m)<br>1.25 (1H, m)          |
| 13       | 30.1, $\text{CH}_2$        | 1.61 (2H, m)                          |
| 14       | 39.6, CH                   | 2.21 (1H, m)                          |
| 15       | 150.5, C                   |                                       |
| 16       | 110.9, $\text{CH}_2$       | 5.26 (1H, br)<br>5.16 (1H, br)        |
| 17       | 67.9, $\text{CH}_2$        | 3.94 (2H, m)                          |
| 18       | 20.8, $\text{CH}_3$        | 0.94 (3H, d, $J = 6.2$ )              |
| 19       | 17.4, $\text{CH}_3$        | 0.93 (3H, d, $J = 7.0$ )              |
| 20       | 19.0, $\text{CH}_3$        | 1.57 (3H, d, $J = 1.2$ )              |

**Table S20**  $^1\text{H}$  NMR (400 MHz) and  $^{13}\text{C}$  NMR (100 MHz) assignments for **9a** in  $\text{CDCl}_3$ .

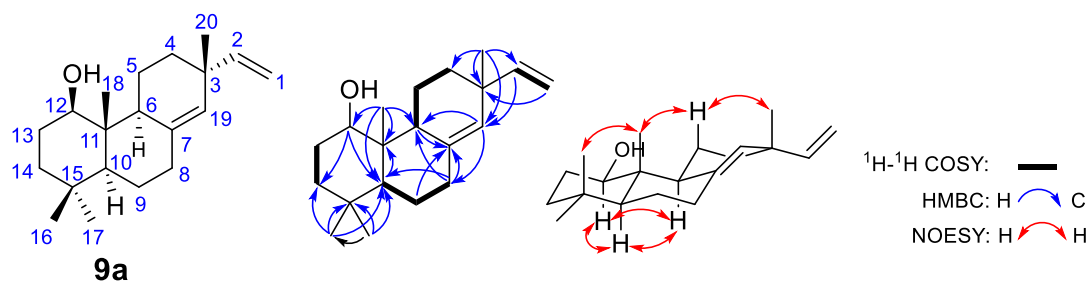

| Position | $\delta_{\text{C}}$ , type | $\delta_{\text{H}}$ (mult, $J$ in Hz)                              |
|----------|----------------------------|--------------------------------------------------------------------|
| 1        | 110.7, $\text{CH}_2$       | 4.93 (1H, dd, $J = 1.5, 10.2$ )<br>4.87 (1H, dd, $J = 1.5, 17.8$ ) |
| 2        | 148.5 CH                   | 5.77 (1H, dd, $J = 10.2, 17.8$ )                                   |
| 3        | 37.9, C                    |                                                                    |
| 4        | 34.1, $\text{CH}_2$        | 1.45 (2H, m)                                                       |
| 5        | 20.8, $\text{CH}_2$        | 1.79 (1H, m)<br>1.61 (1H, m)                                       |
| 6        | 48.7, CH                   | 2.16 (1H, m)                                                       |
| 7        | 135.7, C                   |                                                                    |
| 8        | 35.3, $\text{CH}_2$        | 2.38 (1H, ddd, $J = 1.7, 4.6, 14.7$ )<br>2.20 (1H, m)              |
| 9        | 20.8, $\text{CH}_2$        | 1.76 (1H, m)<br>1.49 (1H, m)                                       |
| 10       | 52.4, CH                   | 1.74 (1H, dd, $J = 3.3, 13.0$ )                                    |
| 11       | 46.4, C                    |                                                                    |
| 12       | 83.4, CH                   | 4.13 (1H, m)                                                       |
| 13       | 29.6 $\text{CH}_2$         | 1.34 (1H, m)<br>1.27 (1H, m)                                       |
| 14       | 31.7, $\text{CH}_2$        | 1.30 (1H, m)                                                       |
| 15       | 42.1, C                    |                                                                    |
| 16       | 28.7, $\text{CH}_3$        | 1.10 (3H, s)                                                       |
| 17       | 20.9, $\text{CH}_3$        | 1.03 (3H, s),                                                      |
| 18       | 9.4, $\text{CH}_3$         | 0.65 (3H, s)                                                       |
| 19       | 131.2, CH                  | 5.32 (1H, s)                                                       |
| 20       | 26.6, $\text{CH}_3$        | 1.05 (3H, s)                                                       |

**Table S21**  $^1\text{H}$  NMR (400 MHz) and  $^{13}\text{C}$  NMR (100 MHz) assignments for **10a** in  $\text{CDCl}_3$ .

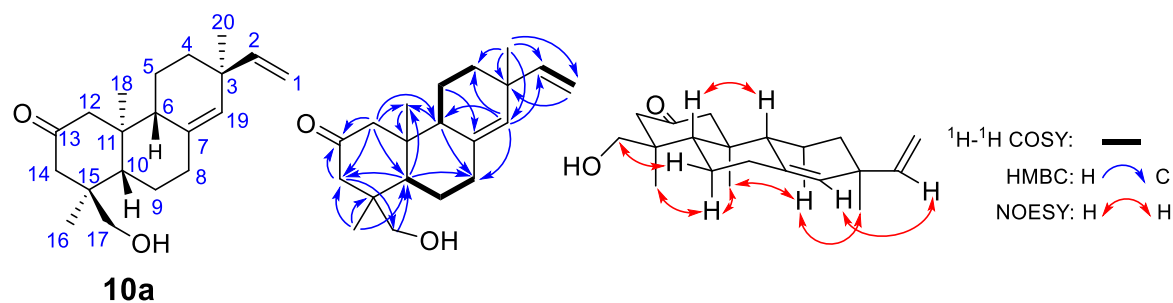

| Position | $\delta_c$ , type    | $\delta_H$ (mult, $J$ in Hz)                            |
|----------|----------------------|---------------------------------------------------------|
| 1        | 110.6, $\text{CH}_2$ | 4.92 (1H, dd, $J = 1.2, 10.2$ )<br>4.89 (1H, br)        |
| 2        | 148.5 CH             | 5.76 (1H, dd, $J = 10.2, 17.8$ )                        |
| 3        | 37.5, C              |                                                         |
| 4        | 34.3, $\text{CH}_2$  | 1.46 (1H, m)<br>1.40 (1H, m)                            |
| 5        | 18.9, $\text{CH}_2$  | 1.58 (1H, m)<br>1.52 (1H, m)                            |
| 6        | 50.1, CH             | 2.02 (1H, m)                                            |
| 7        | 135.8, C             |                                                         |
| 8        | 35.4, $\text{CH}_2$  | 2.33 (1H, m)<br>2.16 (1H, m)                            |
| 9        | 22.7, $\text{CH}_2$  | 1.62 (1H, m)<br>1.42 (1H, m)                            |
| 10       | 46.7, CH             | 2.00 (1H, m)                                            |
| 11       | 43.9, C              |                                                         |
| 12       | 53.7, $\text{CH}_2$  | 2.38 (1H, m)<br>2.24 (1H, m)                            |
| 13       | 212.7, C             |                                                         |
| 14       | 50.5, $\text{CH}_2$  | 2.74 (1H, d, $J = 13.1$ )<br>1.98 (1H, m)               |
| 15       | 43.6, C              |                                                         |
| 16       | 19.7, $\text{CH}_3$  | 0.82 (3H, s)                                            |
| 17       | 70.2, $\text{CH}_2$  | 3.58 (1H, d, $J = 10.8$ ),<br>3.07 (1H, d, $J = 10.8$ ) |
| 18       | 16.2, $\text{CH}_3$  | 0.87 (3H, s)                                            |
| 19       | 130.1, CH            | 5.31 (1H, s)                                            |
| 20       | 26.4, $\text{CH}_3$  | 1.03 (3H, s)                                            |

**Table S22**  $^1\text{H}$  NMR (400 MHz) and  $^{13}\text{C}$  NMR (100 MHz) assignments for **10b** in  $\text{CDCl}_3$ .

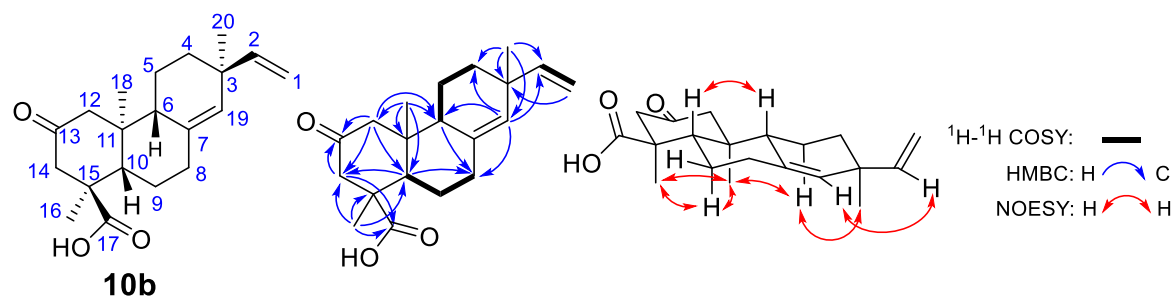

| Position | $\delta_{\text{C}}$ , type | $\delta_{\text{H}}$ (mult, $J$ in Hz)                              |
|----------|----------------------------|--------------------------------------------------------------------|
| 1        | 110.7, $\text{CH}_2$       | 4.93 (1H, dd, $J = 1.4, 10.2$ )<br>4.89 (1H, dd, $J = 1.4, 17.8$ ) |
| 2        | 148.5, CH                  | 5.76 (1H, dd, $J = 10.2, 17.8$ )                                   |
| 3        | 37.6, C                    |                                                                    |
| 4        | 34.2, $\text{CH}_2$        | 1.47 (2H, m)                                                       |
| 5        | 18.8, $\text{CH}_2$        | 1.57 (1H, m)<br>1.43 (1H, m)                                       |
| 6        | 50.4, CH                   | 2.07. (1H, m)                                                      |
| 7        | 134.7, C                   |                                                                    |
| 8        | 35.1, $\text{CH}_2$        | 2.32 (1H, m)<br>2.20 (1H, m)                                       |
| 9        | 24.3, $\text{CH}_2$        | 1.53 (2H, m)                                                       |
| 10       | 49.4, CH                   | 2.42 (1H, m)                                                       |
| 11       | 43.9, C                    |                                                                    |
| 12       | 53.4, $\text{CH}_2$        | 2.45 (1H, m)<br>2.35 (1H, m)                                       |
| 13       | 209.3, C                   |                                                                    |
| 14       | 51.2, $\text{CH}_2$        | 3.00 (1H, d, $J = 13.2$ )<br>2.34 (1H, m)                          |
| 15       | 51.1, C                    |                                                                    |
| 16       | 18.6, $\text{CH}_3$        | 1.22(3H, s)                                                        |
| 17       | 180.7, C                   |                                                                    |
| 18       | 15.9, $\text{CH}_3$        | 0.88 (3H, s)                                                       |
| 19       | 130.7, CH                  | 5.32 (1H, s)                                                       |
| 20       | 26.4, $\text{CH}_3$        | 1.04 (3H, s)                                                       |



**Table S23**  $^1\text{H}$  NMR (400 MHz) and  $^{13}\text{C}$  NMR (100 MHz) assignments for **10c** in  $\text{CDCl}_3$ .

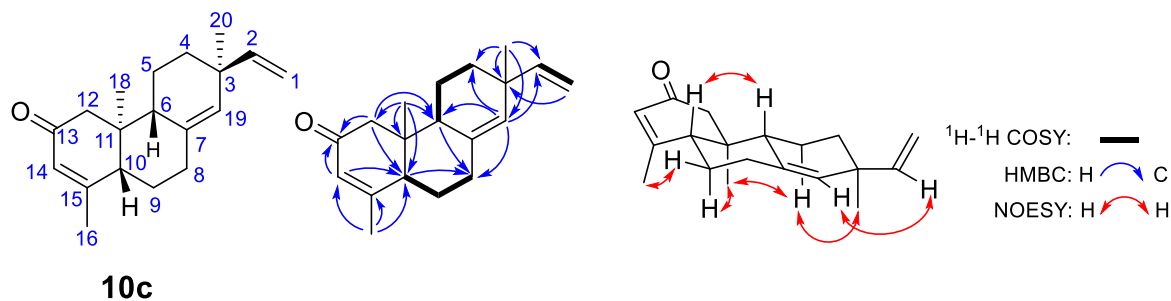

| Position | $\delta_c$ , type    | $\delta_H$ (mult, $J$ in Hz)                                       |
|----------|----------------------|--------------------------------------------------------------------|
| 1        | 110.7, $\text{CH}_2$ | 4.94 (1H, dd, $J = 1.3, 10.7$ )<br>4.90 (1H, dd, $J = 1.3, 17.0$ ) |
| 2        | 148.5, CH            | 5.77 (1H, dd, $J = 10.7, 17.0$ )                                   |
| 3        | 37.6, C              |                                                                    |
| 4        | 34.3, $\text{CH}_2$  | 1.46 (2H, m)                                                       |
| 5        | 19.1, $\text{CH}_2$  | 1.67 (1H, m)<br>1.53 (1H, m)                                       |
| 6        | 47.3, CH             | 2.04 (1H, t, $J = 7.5$ )                                           |
| 7        | 134.7, C             |                                                                    |
| 8        | 35.2, $\text{CH}_2$  | 2.37 (2H, m)                                                       |
| 9        | 24.1, $\text{CH}_2$  | 1.41 (2H, m)                                                       |
| 10       | 49.5, CH             | 2.45 (H, d, $J = 12.2$ )                                           |
| 11       | 41.9, C              |                                                                    |
| 12       | 51.2, $\text{CH}_2$  | 2.22 (1H, d, $J = 15.9$ )<br>2.57 (1H, d, $J = 15.9$ )             |
| 13       | 199.3, C             |                                                                    |
| 14       | 126.8, CH            | 5.91 (1H, s)                                                       |
| 15       | 163.2, C             |                                                                    |
| 16       | 22.5, $\text{CH}_3$  | 1.90 (3H, s)                                                       |
| 18       | 14.3, $\text{CH}_3$  | 0.80 (3H, s)                                                       |
| 19       | 130.7, CH            | 5.34 (1H, s)                                                       |
| 20       | 26.1, $\text{CH}_3$  | 1.05 (3H, s)                                                       |

**Table S24**  $^1\text{H}$  NMR (400 MHz) and  $^{13}\text{C}$  NMR (100 MHz) assignments for **10d** in  $\text{CDCl}_3$ .

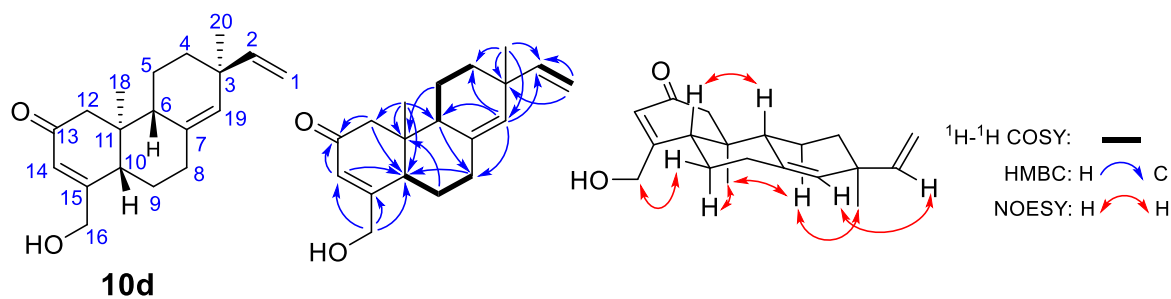

| Position | $\delta_{\text{C}}$ , type | $\delta_{\text{H}}$ (mult, $J$ in Hz)                              |
|----------|----------------------------|--------------------------------------------------------------------|
| 1        | 110.8, $\text{CH}_2$       | 4.93 (1H, dd, $J = 1.3, 10.2$ )<br>4.89 (1H, dd, $J = 1.3, 17.9$ ) |
| 2        | 148.3, CH                  | 5.77 (1H, dd, $J = 10.2, 17.9$ )                                   |
| 3        | 37.6, C                    |                                                                    |
| 4        | 34.2, $\text{CH}_2$        | 1.46 (2H, m)                                                       |
| 5        | 19.2, $\text{CH}_2$        | 1.67 (1H, m)<br>1.51 (1H, m)                                       |
| 6        | 47.2, CH                   | 2.06. (1H, m)                                                      |
| 7        | 134.3, C                   |                                                                    |
| 8        | 35.0, $\text{CH}_2$        | 2.34 (1H, m)<br>2.18 (1H, m)                                       |
| 9        | 23.0, $\text{CH}_2$        | 1.84 (1H, m)<br>1.42 (1H, m)                                       |
| 10       | 47.6, CH                   | 2.56 (1H, m)                                                       |
| 11       | 42.1, C                    |                                                                    |
| 12       | 51.1, $\text{CH}_2$        | 2.58 (1H, d, $J = 15.9$ )<br>2.22 (1H, d, $J = 15.9$ )             |
| 13       | 199.5, C                   |                                                                    |
| 14       | 123.0, CH                  | 6.20 (1H, s)                                                       |
| 15       | 164.0, C                   |                                                                    |
| 16       | 63.3, $\text{CH}_2$        | 4.29 (2H, m)                                                       |
| 18       | 14.3, $\text{CH}_3$        | 0.81 (3H, s)                                                       |
| 19       | 130.9, CH                  | 5.34 (1H, s)                                                       |
| 20       | 26.1, $\text{CH}_3$        | 1.04 (3H, s)                                                       |

**Table S25**  $^1\text{H}$  NMR (400 MHz) and  $^{13}\text{C}$  NMR (100 MHz) assignments for **11a** in methanol- $d_4$ .

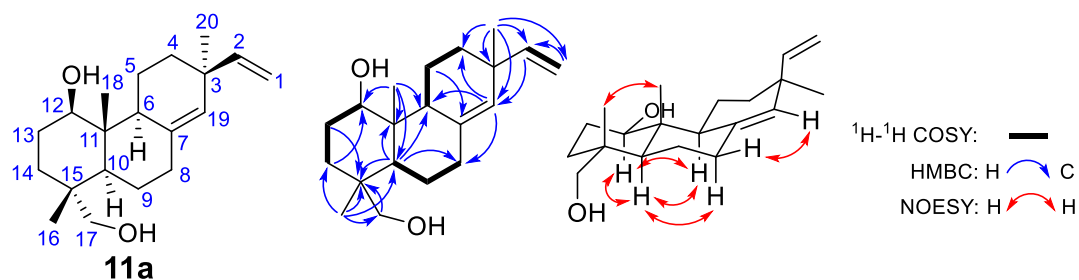

| Position | $\delta_{\text{C}}$ , type | $\delta_{\text{H}}$ (mult, $J$ in Hz)                            |
|----------|----------------------------|------------------------------------------------------------------|
| 1        | 113.4, CH <sub>2</sub>     | 4.95 (1H, dd, $J$ = 10.5, 2.0)<br>4.91 (1H, dd, $J$ = 17.2, 2.0) |
| 2        | 148.5, CH                  | 5.72 (1H, dd $J$ = 10.5, 17.2)                                   |
| 3        | 39.4, C                    |                                                                  |
| 4        | 37.3, CH <sub>2</sub>      | 1.54 (1H, m)<br>1.19 (1H, m)                                     |
| 5        | 23.7, CH <sub>2</sub>      | 1.92 (1H, m)<br>1.63 (1H, m)                                     |
| 6        | 53.6, CH                   | 1.93. (1H, m)                                                    |
| 7        | 140.0, C                   |                                                                  |
| 8        | 37.1, CH <sub>2</sub>      | 2.29 (1H, m)<br>2.12 (1H, m)                                     |
| 9        | 23.2, CH <sub>2</sub>      | 1.53 (1H, m)<br>1.47 (1H, m)                                     |
| 10       | 48.1, CH                   | 1.44 (1H, m)                                                     |
| 11       | 45.1, C                    |                                                                  |
| 12       | 79.7, CH                   | 3.36 (1H, m)                                                     |
| 13       | 34.7, CH <sub>2</sub>      | 1.65 (1H, m)<br>1.25 (1H, m)                                     |
| 14       | 30.0, CH <sub>2</sub>      | 1.61 (2H, m)                                                     |
| 15       | 38.6, C                    |                                                                  |
| 16       | 18.1, CH <sub>3</sub>      | 0.77 (3H, s)                                                     |
| 17       | 71.7, CH <sub>2</sub>      | 3.35 (1H, d, $J$ = 11.0)<br>3.01 (1H, d, $J$ = 11.0)             |
| 18       | 10.1, CH <sub>3</sub>      | 0.82 (3H, s)                                                     |
| 19       | 129.8, CH                  | 5.15 (1H, s)                                                     |
| 20       | 30.1, CH <sub>3</sub>      | 0.95 (3H, s)                                                     |

**Table S26**  $^1\text{H}$  NMR (400 MHz) and  $^{13}\text{C}$  NMR (100 MHz) assignments for **11b** in methanol- $d_4$ .

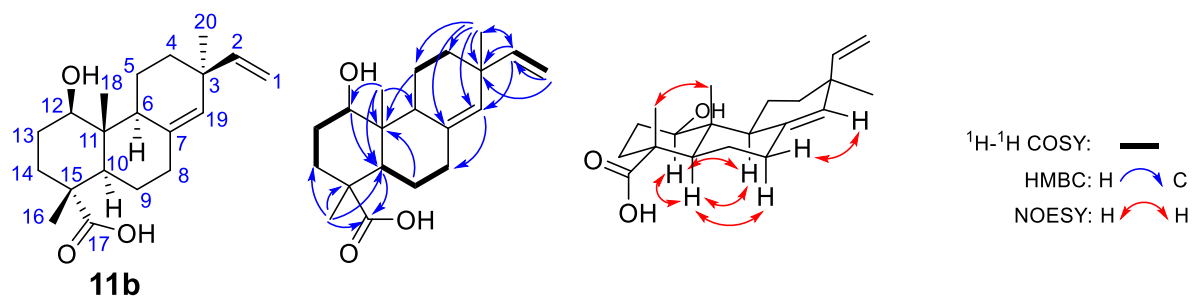

| Position | $\delta_{\text{C}}$ , type | $\delta_{\text{H}}$ (mult, $J$ in Hz)                              |
|----------|----------------------------|--------------------------------------------------------------------|
| 1        | 113.6, $\text{CH}_2$       | 4.95 (1H, dd, $J = 2.1, 10.4$ )<br>4.90 (1H, dd, $J = 2.1, 17.2$ ) |
| 2        | 148.4, CH                  | 5.73 (1H, dd, $J = 10.4, 17.2$ )                                   |
| 3        | 39.4, C                    |                                                                    |
| 4        | 37.2, $\text{CH}_2$        | 1.55 (1H, m)<br>1.21 (1H, m)                                       |
| 5        | 23.7, $\text{CH}_2$        | 1.93 (1H, m)<br>1.67 (1H, m)                                       |
| 6        | 53.8, CH                   | 1.97. (1H, m)                                                      |
| 7        | 139.5, C                   |                                                                    |
| 8        | 37.1, $\text{CH}_2$        | 2.29 (1H, m)<br>2.11 (1H, m)                                       |
| 9        | 25.9, $\text{CH}_2$        | 1.62 (1H, m)<br>1.26 (1H, m)                                       |
| 10       | 50.4, CH                   | 1.92 (1H, m)                                                       |
| 11       | 45.0, C                    |                                                                    |
| 12       | 79.2, CH                   | 3.48 (1H, dd, $J = 6.2, 9.6$ )                                     |
| 13       | 29.7, $\text{CH}_2$        | 1.64, (2H, m)                                                      |
| 14       | 36.3, $\text{CH}_2$        | 1.90 (1H, m)<br>1.55 (1H, m)                                       |
| 15       | 48.4, C                    |                                                                    |
| 16       | 17.2, $\text{CH}_3$        | 1.17 (3H, s)                                                       |
| 17       | 182.3, C                   |                                                                    |
| 18       | 9.9, $\text{CH}_3$         | 0.82 (3H, s)                                                       |
| 19       | 130.3, CH                  | 5.17 (1H, s)                                                       |
| 20       | 30.1, $\text{CH}_3$        | 0.96 (3H, s)                                                       |

**Table S27**  $^1\text{H}$  NMR (400 MHz) and  $^{13}\text{C}$  NMR (100 MHz) assignments for **11c** in  $\text{CDCl}_3$ .

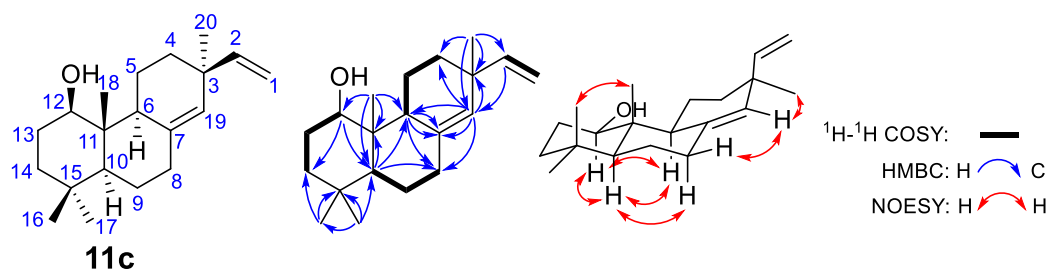

| Position | $\delta_{\text{C}}$ , type | $\delta_{\text{H}}$ (mult, $J$ in Hz)                                          |
|----------|----------------------------|--------------------------------------------------------------------------------|
| 1        | 113.2, $\text{CH}_2$       | 4.96 (1H, dd, $J = 2.0, 10.4$ )<br>4.92 (1H, dd, $J = 2.0, 17.3$ )             |
| 2        | 147.3, CH                  | 5.72 (1H, dd, $J = 10.4, 17.3$ )                                               |
| 3        | 38.5, C                    |                                                                                |
| 4        | 36.1, $\text{CH}_2$        | 1.57 (1H, m)<br>1.22 (1H, m)                                                   |
| 5        | 23.0, $\text{CH}_2$        | 1.81 (1H, m)<br>1.60 (1H, m)                                                   |
| 6        | 52.1, CH                   | 1.90. (1H, m)                                                                  |
| 7        | 138.3, C                   |                                                                                |
| 8        | 36.3, $\text{CH}_2$        | 2.32 (1H, ddd, $J = 1.9, 4.5, 14.2$ )<br>2.04 (1H, ddd, $J = 1.9, 4.5, 14.2$ ) |
| 9        | 22.6, $\text{CH}_2$        | 1.59 (1H, m)<br>1.46 (1H, m)                                                   |
| 10       | 54.3, CH                   | 1.01 (1H, dd, $J = 2.6, 12.4$ )                                                |
| 11       | 44.4, C                    |                                                                                |
| 12       | 79.3, CH                   | 3.45 (1H, dd, $J = 5.8, 10.0$ )                                                |
| 13       | 29.8, $\text{CH}_2$        | 1.58, (2H, m)                                                                  |
| 14       | 39.9, $\text{CH}_2$        | 1.38 (1H, m)<br>1.33 (1H, m)                                                   |
| 15       | 33.4, C                    |                                                                                |
| 16       | 33.3, $\text{CH}_3$        | 0.87 (3H, s)                                                                   |
| 17       | 21.8, $\text{CH}_3$        | 0.83 (3H, s)                                                                   |
| 18       | 8.9, $\text{CH}_3$         | 0.77 (3H, s)                                                                   |
| 19       | 129.0, CH                  | 5.17 (1H, s)                                                                   |
| 20       | 29.6, $\text{CH}_3$        | 0.98 (3H, s)                                                                   |

**Table S28**  $^1\text{H}$  NMR (400 MHz) and  $^{13}\text{C}$  NMR (100 MHz) assignments for **12b** in  $\text{CDCl}_3$ .

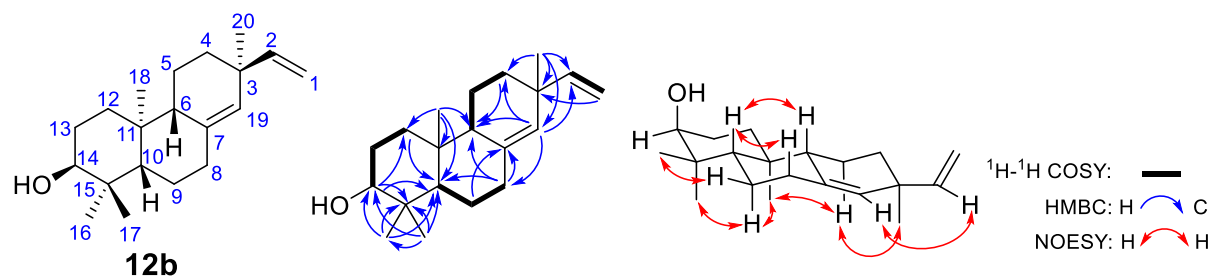

| Position | $\delta_c$ , type    | $\delta_H$ (mult, $J$ in Hz)                                       |
|----------|----------------------|--------------------------------------------------------------------|
| 1        | 110.1, $\text{CH}_2$ | 4.90 (1H, dd, $J = 1.4, 17.1$ )<br>4.86 (1H, dd, $J = 1.4, 10.5$ ) |
| 2        | 149.1, CH            | 5.76 (1H, dd $J = 10.5, 17.1$ )                                    |
| 3        | 37.5, C              |                                                                    |
| 4        | 34.7, $\text{CH}_2$  | 1.44 (1H, m)<br>1.34 (1H, m)                                       |
| 5        | 18.8, $\text{CH}_2$  | 1.61 (1H, m)<br>1.45 (1H, m)                                       |
| 6        | 50.4, CH             | 1.79 (1H, t, $J = 7.8$ )                                           |
| 7        | 137.1, C             |                                                                    |
| 8        | 36.0, $\text{CH}_2$  | 2.24 (1H, m)<br>2.07 (1H, m)                                       |
| 9        | 22.3, $\text{CH}_2$  | 1.48 (1H, m)<br>1.34 (1H, m)                                       |
| 10       | 48.3, CH             | 1.46 (1H, m)                                                       |
| 11       | 37.6, C              |                                                                    |
| 12       | 31.7, $\text{CH}_2$  | 1.53 (1H, m)<br>1.45 (1H, m)                                       |
| 13       | 25.5, $\text{CH}_2$  | 1.89 (1H, m)<br>1.60 (1H, m)                                       |
| 14       | 76.3, CH             | 3.46 (1H, s)                                                       |
| 15       | 38.0, C              |                                                                    |
| 16       | 28.6, $\text{CH}_3$  | 0.95 (3H, m)                                                       |
| 17       | 22.8, $\text{CH}_3$  | 0.86 (3H, s)                                                       |
| 18       | 15.0, $\text{CH}_3$  | 0.81 (3H, s)                                                       |
| 19       | 128.8, CH            | 5.21 (1H, s)                                                       |
| 20       | 26.1, $\text{CH}_3$  | 1.03 (3H, s)                                                       |

**Table S29**  $^1\text{H}$  NMR (400 MHz) and  $^{13}\text{C}$  NMR (100 MHz) assignments for **12c** in acetone- $d_6$ .

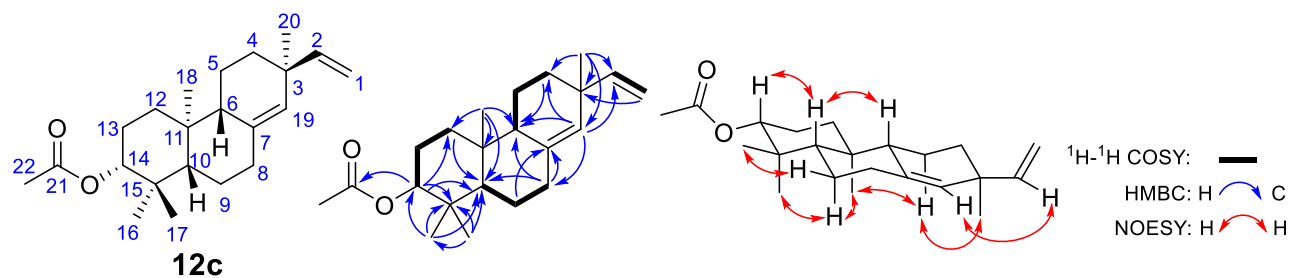

| Position | $\delta_c$ , type      | $\delta_H$ (mult, $J$ in Hz)                                      |
|----------|------------------------|-------------------------------------------------------------------|
| 1        | 110.6, CH <sub>2</sub> | 4.91 (1H, dd $J = 1.5, 17.5$ )<br>4.86 (1H, dd, $J = 1.5, 10.6$ ) |
| 2        | 149.6, CH              | 5.77 (1H, dd $J = 10.6, 17.5$ )                                   |
| 3        | 38.1, C                |                                                                   |
| 4        | 35.3, CH <sub>2</sub>  | 1.48, 1.38 (2H, m)                                                |
| 5        | 19.5, CH <sub>2</sub>  | 1.62 (2H, m)                                                      |
| 6        | 51.0, CH               | 1.78. (1H, m)                                                     |
| 7        | 137.4, C               |                                                                   |
| 8        | 36.4, CH <sub>2</sub>  | 2.31 (1H, m)<br>2.10 (1H, m)                                      |
| 9        | 22.8, CH <sub>2</sub>  | 1.64 (1H, m)<br>1.40 (1H, m)                                      |
| 10       | 54.9, CH               | 1.22 (1H, m)                                                      |
| 11       | 38.6, C                |                                                                   |
| 12       | 37.6, CH <sub>2</sub>  | 1.80 (1H, m)<br>1.30 (1H, m)                                      |
| 13       | 25.8, CH <sub>2</sub>  | 1.63 (2H, m)                                                      |
| 14       | 80.9, CH               | 4.52 (H, dd, $J = 5.1, 10.9$ )                                    |
| 15       | 38.7, C                |                                                                   |
| 16       | 28.8, CH <sub>3</sub>  | 0.90 (3H, s)                                                      |
| 17       | 17.4, CH <sub>3</sub>  | 0.93 (3H, s)                                                      |
| 18       | 15.4, CH <sub>3</sub>  | 0.86 (3H, s)                                                      |
| 19       | 137.4, C               |                                                                   |
| 20       | 26.4, CH <sub>3</sub>  | 1.04 (3H, s)                                                      |
| 21       | 170.2, C               |                                                                   |
| 22       | 23.0, CH <sub>3</sub>  | 0.88 (3H, s)                                                      |

### III. Physicochemical data of compounds.

**Compound 1:** colorless oil,  $[\alpha]_{\text{D}}^{25} = +32.0$  (*c* 1.2, CHCl<sub>3</sub>); EI mass spectrum is showed in Figure S8. <sup>1</sup>H NMR (400 MHz), <sup>13</sup>C NMR (100 MHz) data and optical rotation of **1** are in agreement with the reported guaia-1(10),11-diene<sup>34</sup>.

**Compound 2:** colorless oil,  $[\alpha]_{\text{D}}^{25} = +25.2$  (*c* 2.5, CHCl<sub>3</sub>); NMR data in CDCl<sub>3</sub> is showed in Table S6; EI mass spectrum is showed in Figure S16.

**Compound 3:** colorless oil,  $[\alpha]_{\text{D}}^{25} = +85.4$  (*c* 1.5, CHCl<sub>3</sub>); EI mass spectrum is showed in Figure S19. <sup>1</sup>H NMR (400 MHz), <sup>13</sup>C NMR (100 MHz) data and optical rotation of **3** are in agreement with the reported 7-*epi-cis*-sesquisabinene hydrate<sup>35</sup>.

**Compound 4:** colorless oil,  $[\alpha]_{\text{D}}^{25} = +10.2$  (*c* 1.2, CHCl<sub>3</sub>); EI mass spectrum is showed in Figure S22. <sup>1</sup>H NMR (400 MHz), <sup>13</sup>C NMR (100 MHz) data and optical rotation of **4** are in agreement with the reported spiroalbatene<sup>26</sup>.

**Compound 5:** colorless oil,  $[\alpha]_{\text{D}}^{25} = +38.9$  (*c* 1.1, n-hexane); EI mass spectrum is showed in Figure S25, <sup>1</sup>H NMR (400 MHz), <sup>13</sup>C NMR (100 MHz) data and optical rotation of **5** are in agreement with the reported benditerpe-2,6,15-triene<sup>33</sup>.

**Compound 5':** colorless oil,  $[\alpha]_{\text{D}}^{25} = +51.7$  (*c* 1.6, n-hexane); NMR data in CDCl<sub>3</sub> is showed in Table S7; EI mass spectrum is showed in Figure S33.

**Compound 6':** colorless oil,  $[\alpha]_{\text{D}}^{25} = -66.8$  (*c* 2.1, n-hexane); NMR data in CDCl<sub>3</sub> is showed in Table S8; EI mass spectrum is showed in Figure S49.

**Compound 6:** colorless oil,  $[\alpha]_{\text{D}}^{25} = -22.8$  (*c* 2.5, n-hexane); NMR data in CDCl<sub>3</sub> is showed in Table S9; EI mass spectrum is showed in Figure S41.

**Compound 7:** colorless oil,  $[\alpha]_{\text{D}}^{25} = +10.5$  (*c* 1.3, CHCl<sub>3</sub>); EI mass spectrum is showed in Figure S52. <sup>1</sup>H NMR (400 MHz), <sup>13</sup>C NMR (100 MHz) data and optical rotation of **7** are in agreement with the reported (*S*)-(+)-cembrene A<sup>36</sup>.

**Compound 8:** colorless oil,  $[\alpha]_{\text{D}}^{25} = -78.2$  (*c* 0.9, CHCl<sub>3</sub>); NMR data in CDCl<sub>3</sub> is showed in Table S10; EI mass spectrum is showed in Figure S60.

**Compound 9:** colorless oil,  $[\alpha]_{\text{D}}^{25} = -20.5$  (*c* 0.7, CHCl<sub>3</sub>); EI mass spectrum is showed in Figure S63 <sup>1</sup>H NMR (400 MHz), <sup>13</sup>C NMR (100 MHz) data and optical rotation of **9** are in agreement with the reported sandaracopimaradiene<sup>37</sup>.

**Compound 10:** colorless oil,  $[\alpha]_{\text{D}}^{25} = +16.1$  (*c* 0.6, CHCl<sub>3</sub>); EI mass spectrum is showed in Figure S66. <sup>1</sup>H NMR (400 MHz), <sup>13</sup>C NMR (100 MHz) data and optical rotation of **10** are in agreement with the reported *ent*-sandaracopimaradiene<sup>38</sup>.

**Compound 11:** colorless oil,  $[\alpha]_{\text{D}}^{25} = +91.2$  (*c* 1.3, CHCl<sub>3</sub>); EI mass spectrum is showed in Figure S69. <sup>1</sup>H NMR (400 MHz), <sup>13</sup>C NMR (100 MHz) data and optical rotation of **11** are in agreement with the reported pimara-8(14),15-diene<sup>39</sup>.

**Compound 2a:** colorless oil,  $[\alpha]_{\text{D}}^{25} = +150.6$  (*c* 0.9, CHCl<sub>3</sub>); NMR data in CDCl<sub>3</sub> is showed in Table S11; EI mass spectrum is showed in Figure S77.

**Compound 3a:** yellow powder,  $[\alpha]_{\text{D}}^{25} = +35.3$  (*c* 1.3, methanol); NMR data in methanol-*d*<sub>4</sub> is showed in Table S12; EI mass spectrum is showed in Figure S85; HRESIMS *m/z* 313.2012 [M+H]<sup>+</sup> (calcd. for C<sub>17</sub>H<sub>28</sub>O<sub>5</sub>, 313.2010).

**Compound 3b:** yellow powder,  $[\alpha]_{\text{D}}^{25} = +16.2$  (*c* 1.4, methanol); NMR data in methanol-*d*<sub>4</sub> is showed in Table S13; EI mass spectrum is showed in Figure S93; HRESIMS *m/z* 313.2010 [M+H]<sup>+</sup> (calcd. for C<sub>17</sub>H<sub>28</sub>O<sub>5</sub>, 313.2010).

**Compound 3c:** yellow oil,  $[\alpha]_{\text{D}}^{25} = +130.1$  (*c* 0.8, CHCl<sub>3</sub>); NMR data in CDCl<sub>3</sub> is showed in Table S14; EI mass spectrum is showed in Figure S101.

**Compound 3e:** yellow oil,  $[\alpha]_{\text{D}}^{25} = -17.5$  (*c* 0.5, CHCl<sub>3</sub>); NMR data in CDCl<sub>3</sub> is showed in Table S15; EI mass spectrum is showed in Figure S109; HRESIMS *m/z* 235.1715 [M-H<sub>2</sub>O+H]<sup>+</sup> (calcd. for C<sub>17</sub>H<sub>28</sub>O<sub>5</sub>, 235.1693).

**Compound 4a:** colorless oil,  $[\alpha]_{\text{D}}^{25} = +30.1$  (*c* 1.5, CHCl<sub>3</sub>); NMR data in CDCl<sub>3</sub> is showed in Table S16; EI mass spectrum is showed in Figure S117.

**Compound 5a:** colorless waxy solid,  $[\alpha]_{\text{D}}^{25} = +6.8$  (*c* 1.2, CHCl<sub>3</sub>); NMR data in CDCl<sub>3</sub> is showed in Table S17; EI mass spectrum is showed in Figure S125; HRESIMS *m/z* 301.2164 [M - H<sub>2</sub>O + H]<sup>+</sup> (calcd for C<sub>20</sub>H<sub>30</sub>O<sub>3</sub>, 301.2162).



**Compound 6a:** colorless waxy solid,  $[\alpha]_{\text{D}}^{25} = -13.8$  (*c* 1.1, CHCl<sub>3</sub>); NMR data in CDCl<sub>3</sub> is showed in Table S18; EI mass spectrum is showed in Figure S133.

**Compound 6b:** colorless waxy solid,  $[\alpha]_{\text{D}}^{25} = -10.7$  (*c* 1.5, CHCl<sub>3</sub>); NMR data in CDCl<sub>3</sub> is showed in Table S19; EI mass spectrum is showed in Figure S141.

**Compound 9a:** colorless waxy solid,  $[\alpha]_{\text{D}}^{25} = -4.5$  (*c* 1.9, CHCl<sub>3</sub>); NMR data in CDCl<sub>3</sub> is showed in Table S20; EI mass spectrum is showed in Figure S149.

**Compound 10a:** white powder,  $[\alpha]_{\text{D}}^{25} = +10.8$  (*c* 1.3, CHCl<sub>3</sub>); NMR data in CDCl<sub>3</sub> is showed in Table S21; EI mass spectrum is showed in Figure S157.

**Compound 10b:** white powder,  $[\alpha]_{\text{D}}^{25} = +22.6$  (*c* 0.5, methanol); NMR data in CDCl<sub>3</sub> is showed in Table S22; EI mass spectrum is showed in Figure S165; HRESIMS *m/z* 339.1938 [M + Na]<sup>+</sup> (calcd. for C<sub>20</sub>H<sub>28</sub>O<sub>3</sub>Na, 339.1931).

**Compound 10c:** white powder,  $[\alpha]_{\text{D}}^{25} = +38.8$  (*c* 1.0, CHCl<sub>3</sub>); NMR data in CDCl<sub>3</sub> is showed in Table S23; EI mass spectrum is showed in Figure S173.

**Compound 10d:** white powder,  $[\alpha]_{\text{D}}^{25} = +59.5$  (*c* 1.1, CHCl<sub>3</sub>); NMR data in CDCl<sub>3</sub> is showed in Table S24; EI mass spectrum is showed in Figure S181.

**Compound 11a:** white powder,  $[\alpha]_{\text{D}}^{25} = +100.1$  (*c* 0.9, methanol); NMR data in methanol-*d*<sub>4</sub> is showed in Table S25; EI mass spectrum is showed in Figure S189.

**Compound 11b:** white powder,  $[\alpha]_{\text{D}}^{25} = +16.0$  (*c* 0.2, methanol); NMR data in methanol-*d*<sub>4</sub> is showed in Table S26; EI mass spectrum is showed in Figure S198; HRESIMS *m/z* 301.2168 [M - H<sub>2</sub>O + H]<sup>+</sup> (calcd. for C<sub>20</sub>H<sub>30</sub>O<sub>3</sub>, 301.2162).

**Compound 11c:** white powder,  $[\alpha]_{\text{D}}^{25} = +92.0$  (*c* 0.8, CHCl<sub>3</sub>); NMR data in methanol-*d*<sub>4</sub> is showed in Table S27; EI mass spectrum is showed in Figure S206.

**Compound 12a:** colorless oil,  $[\alpha]_{\text{D}}^{25} = +52.0$  (*c* 0.2, CHCl<sub>3</sub>); EI mass spectrum is showed in Figure S207. <sup>1</sup>H NMR (400 MHz), <sup>13</sup>C NMR (100 MHz) data and optical rotation of **12a** are in agreement with the reported *ent*-isopimara-8(14),15-dien-3β-ol<sup>40</sup>.

**Compound 12b:** colorless oil,  $[\alpha]_{\text{D}}^{25} = +28.0$  (*c* 0.2, CHCl<sub>3</sub>); NMR data in methanol-*d*<sub>4</sub> is showed in Table S28; EI mass spectrum is showed in Figure S217.

**Compound 12c:** colorless waxy solid,  $[\alpha]_{\text{D}}^{25} = -6.4$  (*c* 1.7, methanol); NMR data in methanol-*d*<sub>4</sub> is showed in Table S29; EI mass spectrum is showed in Figure S225; HRESIMS *m/z* 331.2631 [M + H]<sup>+</sup> (calcd. for C<sub>22</sub>H<sub>34</sub>O<sub>2</sub>, 331.2632).

#### IV. Supplementary Figures:

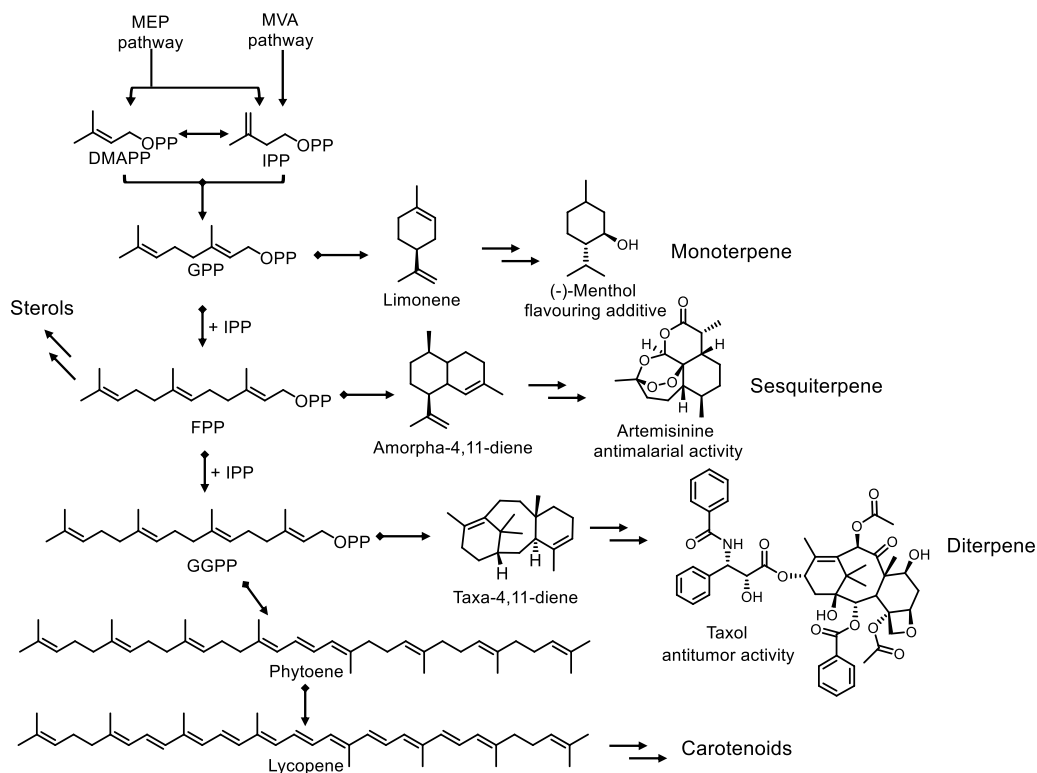

**Figure S1** Biosynthesis of terpenoids and the activity of classic compounds containing multistep modifications. In these cases of menthol, artemisinin and taxol, the activity of terpene skeletons is not detectable.

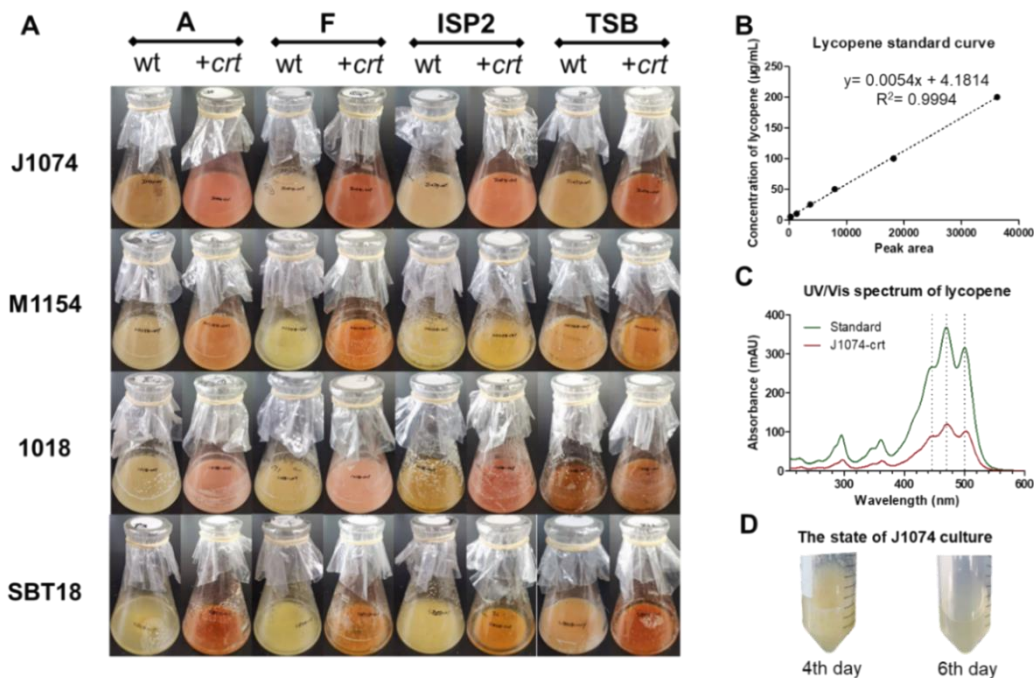

**Figure S2** Evaluation of *Streptomyces* expression system. (A) the figures of strains were cultured in liquid mediums with or without lycopene gene cluster. (B) the lycopene standard curve. (C) the UV-Vis spectrum of lycopene, the  $\lambda$  of dotted lines was 444 nm, 470 nm, 500 nm, respectively. (D) the state of *S. albus* J1074 strain was cultured for 4 days and 6 days in medium F.

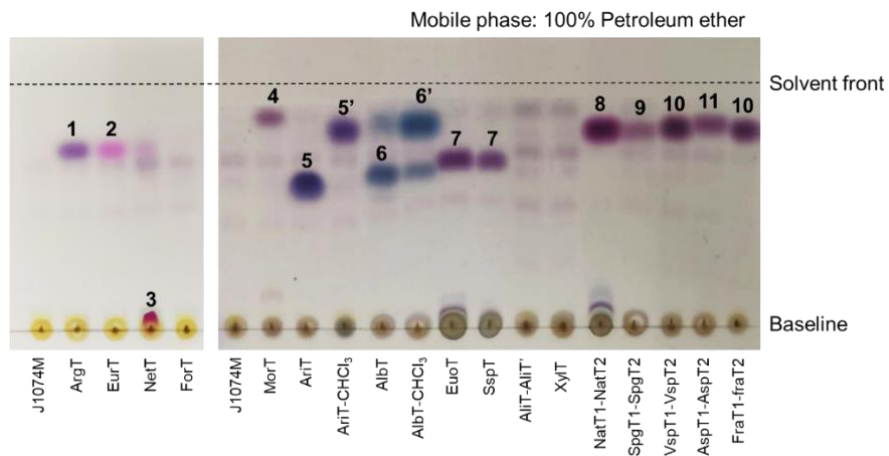

**Figure S3** The TLC analysis of organic extracts were produced by *S. albus* J1074M and recombinant strains containing terpene synthases.

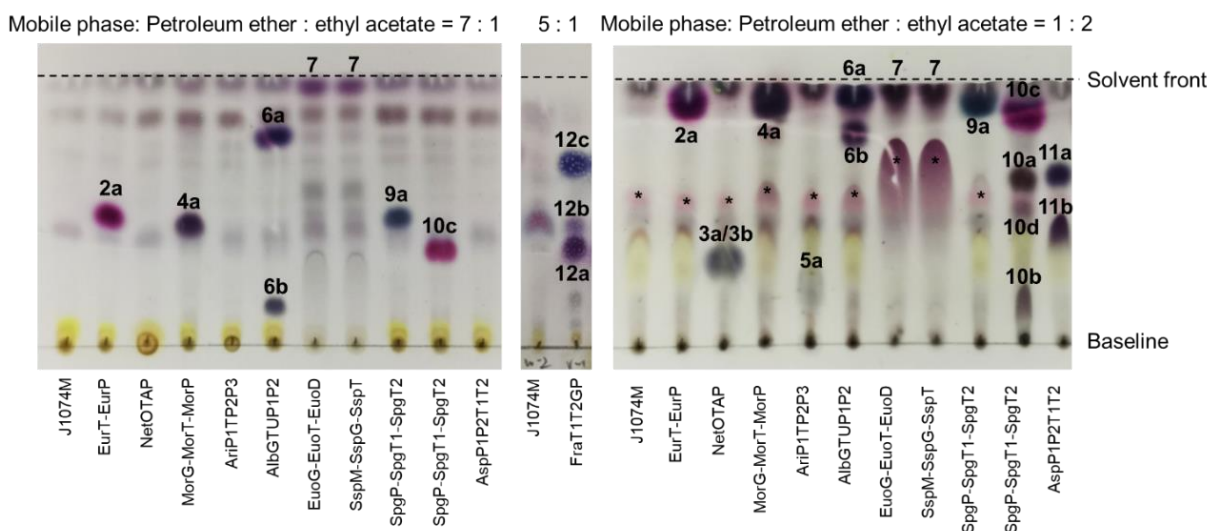

**Figure S4** The TLC analysis of organic extracts were produced by *S. albus* J1074M and recombinant strains containing intact terpene BGCs. \*: An oily unknown substance produced by chassis cell.

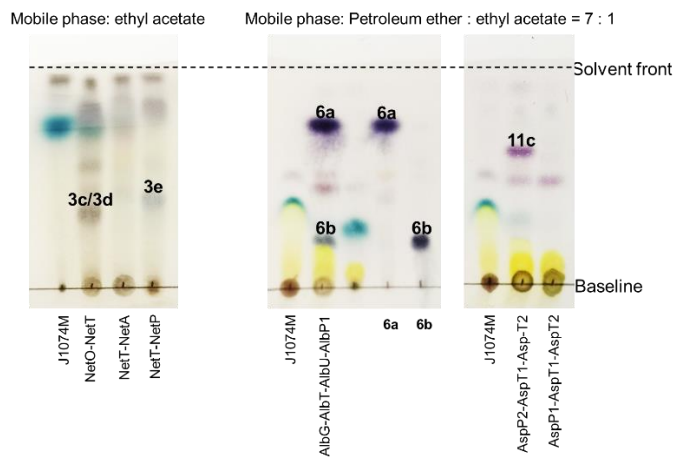

**Figure S5** The TLC analysis of organic extracts were produced by *S. albus* J1074M and recombinant strains. The tailoring enzymes in cluster *net*, *alb* and *asp* were expressed individually.

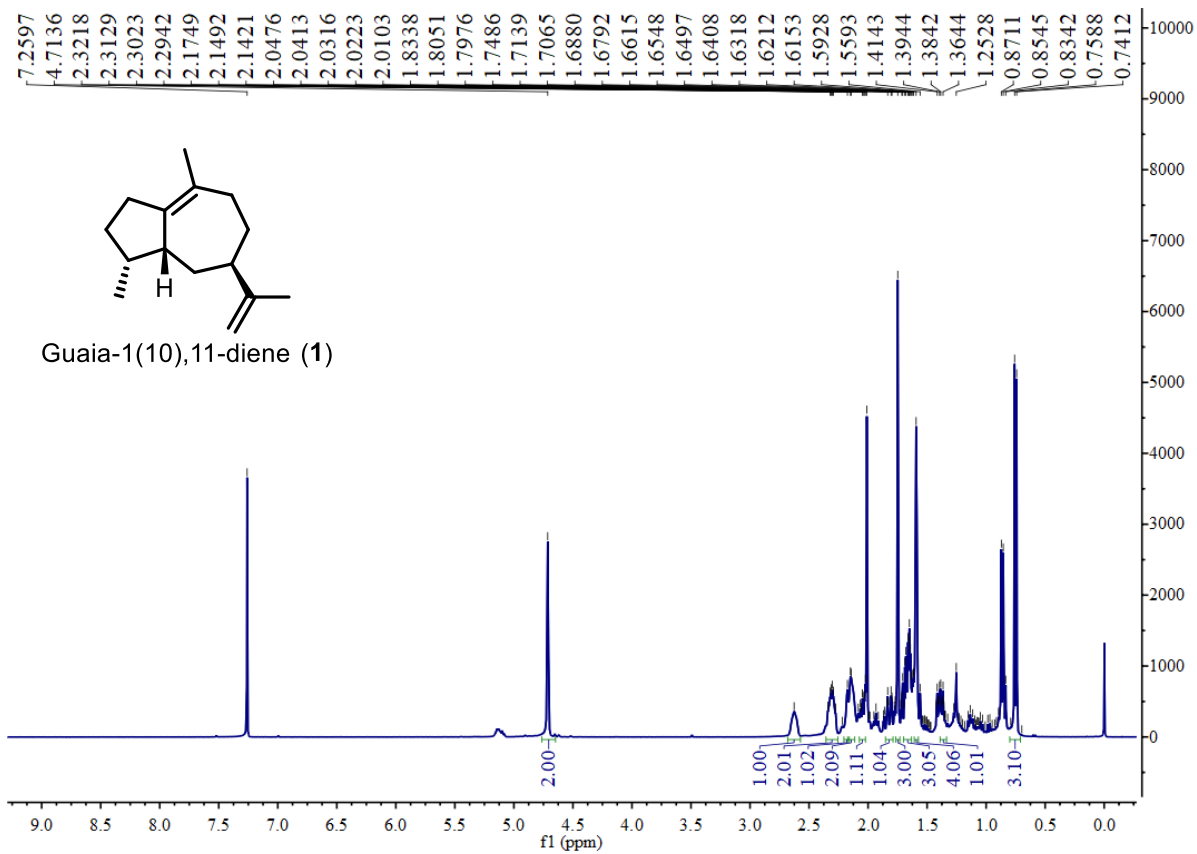

**Figure S6**  $^1\text{H}$  NMR spectrum of **1** in  $\text{CDCl}_3$  (400 MHz).

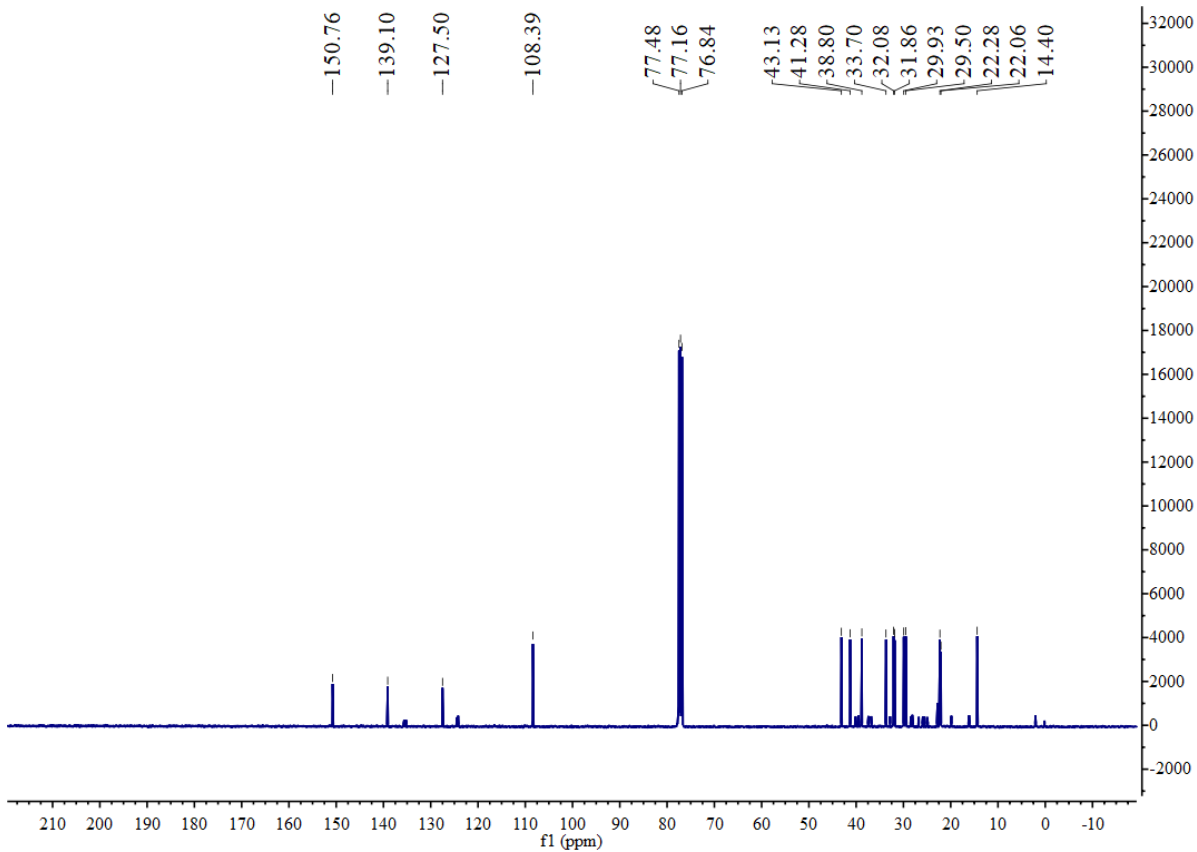

**Figure S7**  $^{13}\text{C}$  NMR spectrum of **1** in  $\text{CDCl}_3$  (100 MHz).

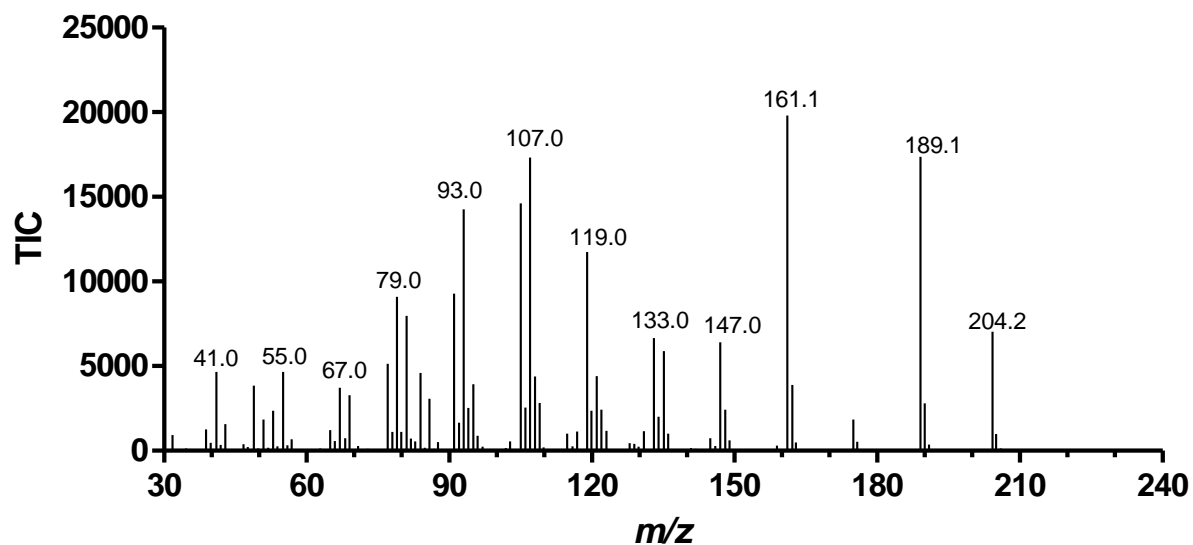

Figure S8 EI mass spectrum of **1**.

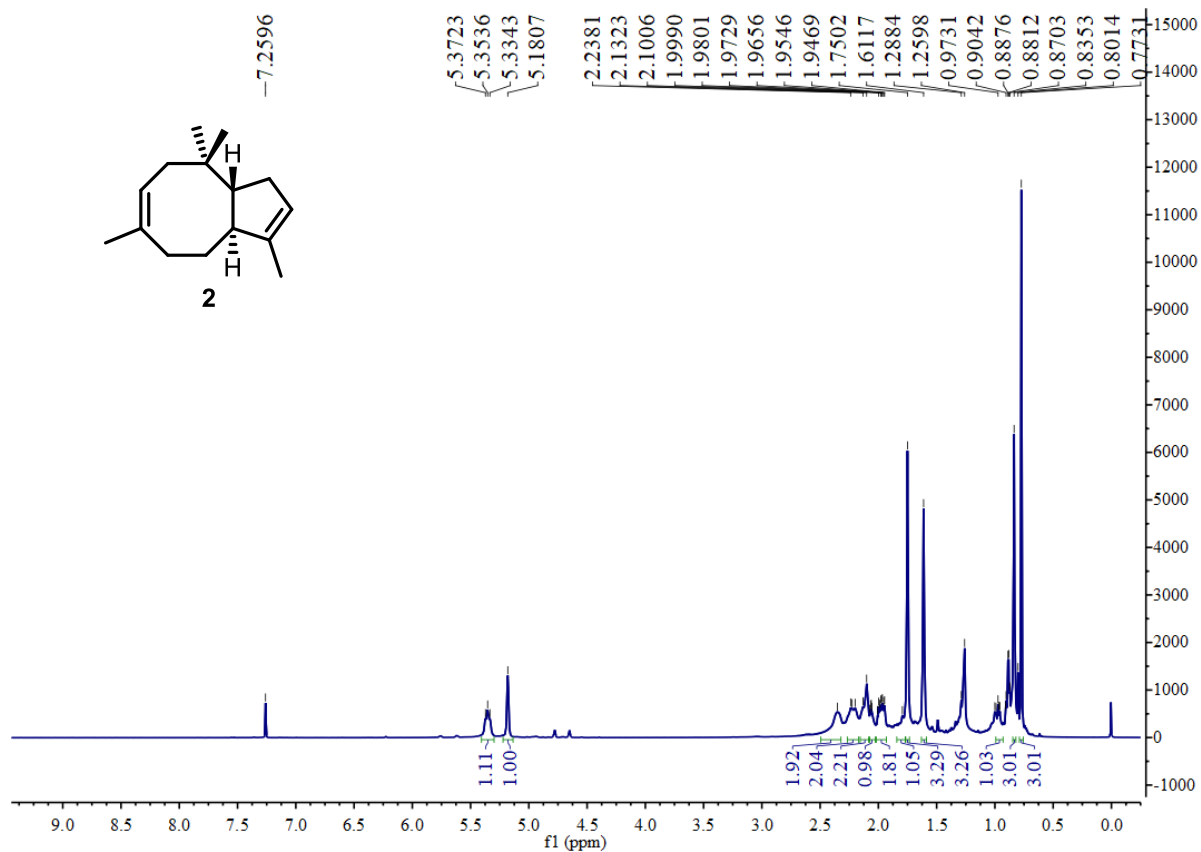

Figure S9 <sup>1</sup>H NMR spectrum of **2** in CDCl<sub>3</sub> (400 MHz).

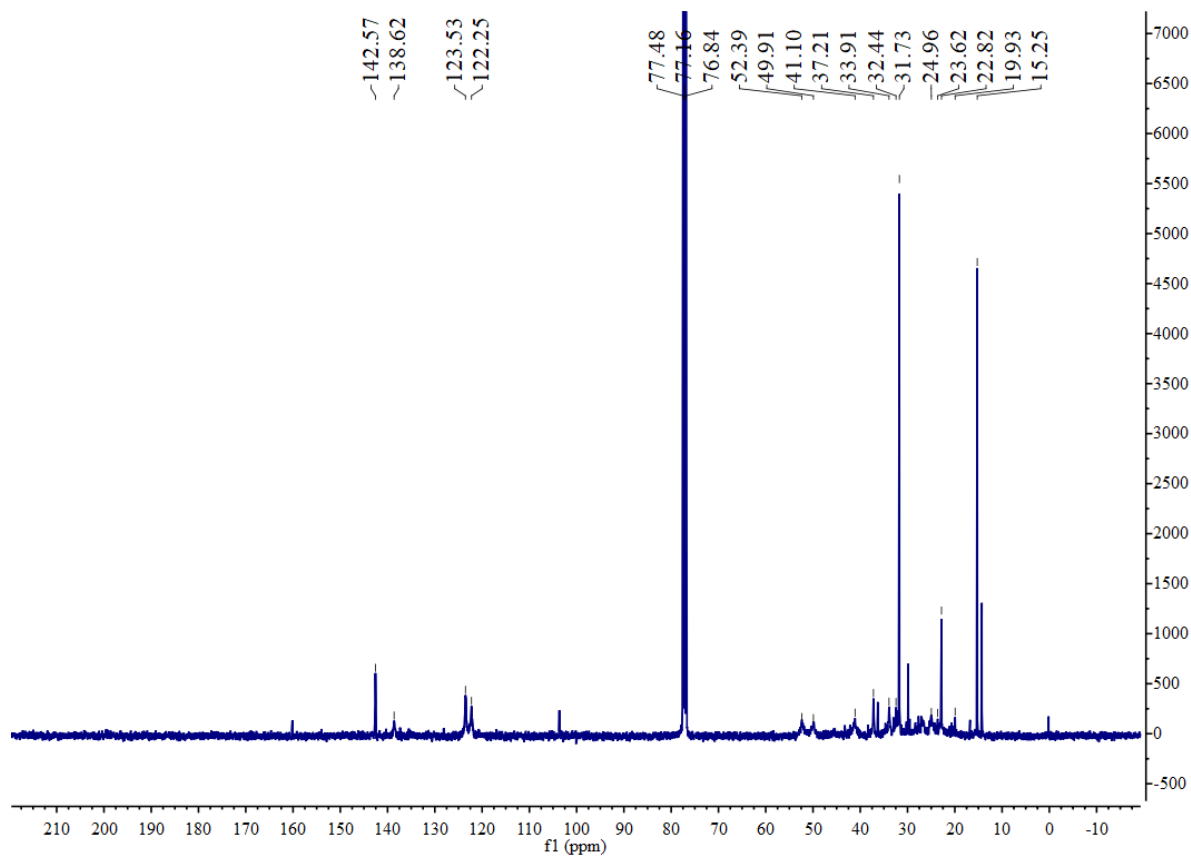

Figure S10  $^{13}\text{C}$  NMR spectrum of **2** in  $\text{CDCl}_3$  (100 MHz)

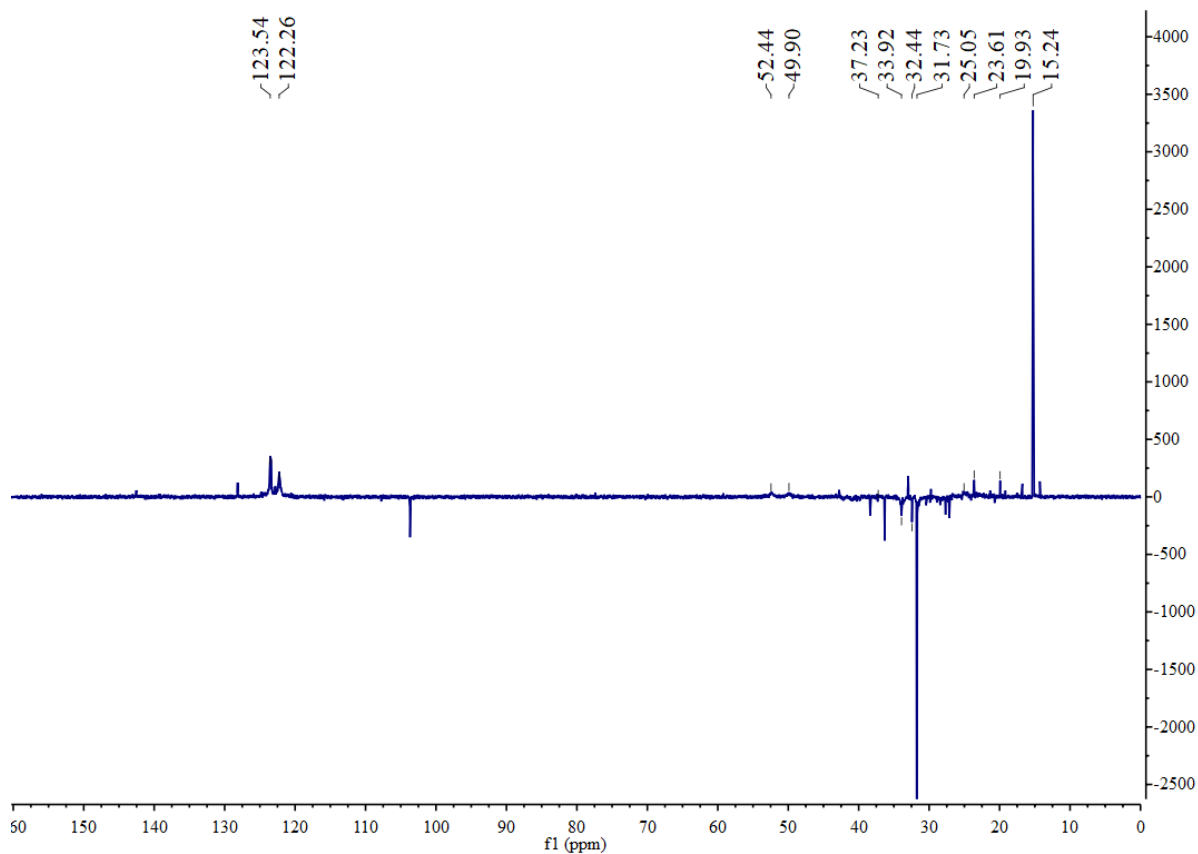

Figure S11 DEPT-135 NMR spectrum of **2** in  $\text{CDCl}_3$  (100 MHz).

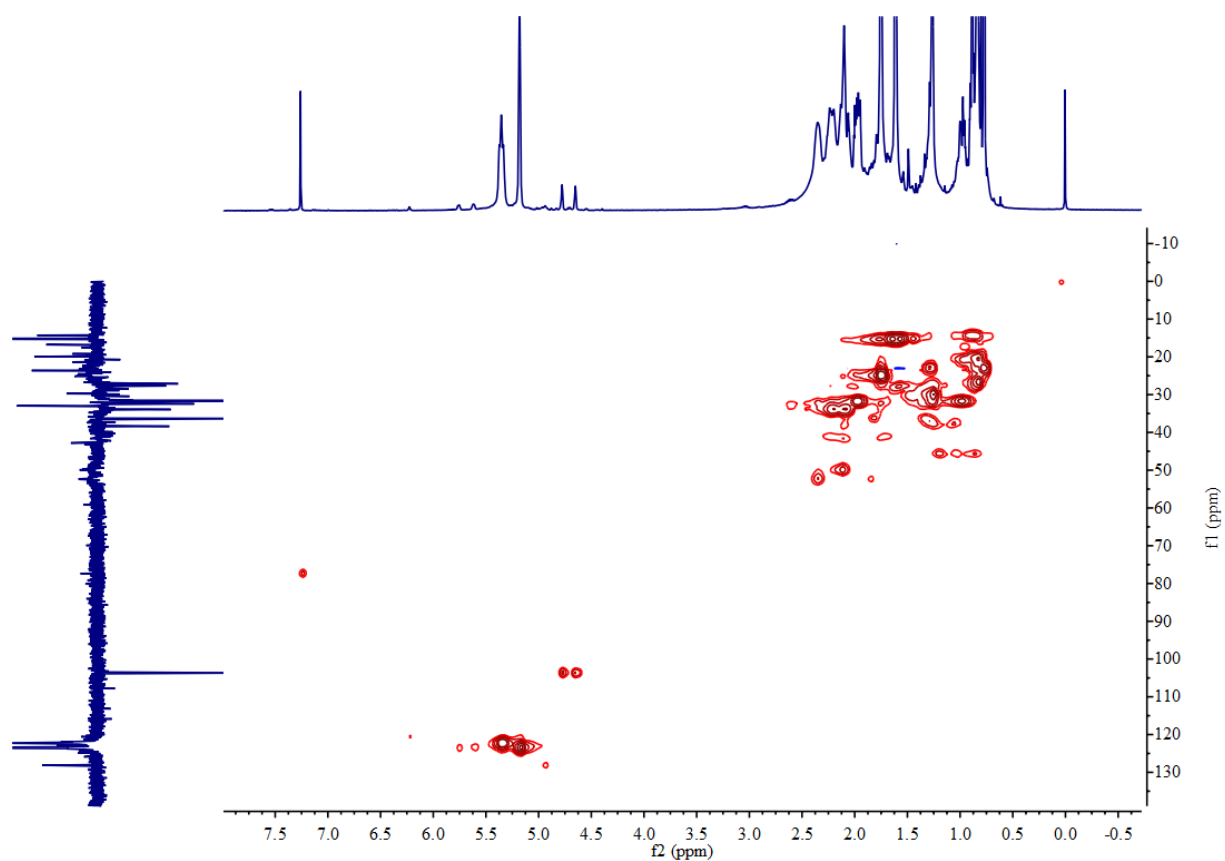

Figure S12 HSQC spectrum of **2** in CDCl<sub>3</sub> (400 MHz).

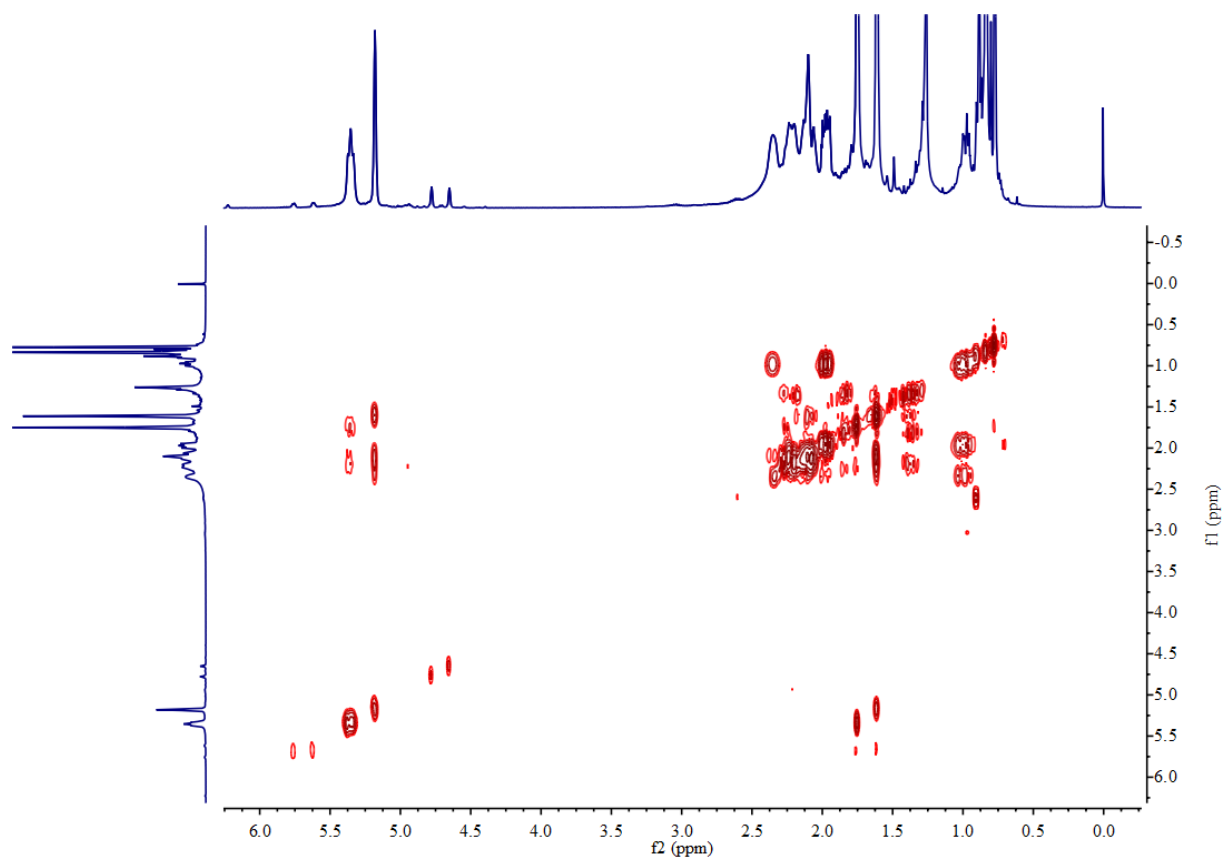

Figure S13 <sup>1</sup>H-<sup>1</sup>H COSY spectrum of **2** in CDCl<sub>3</sub> (400 MHz).

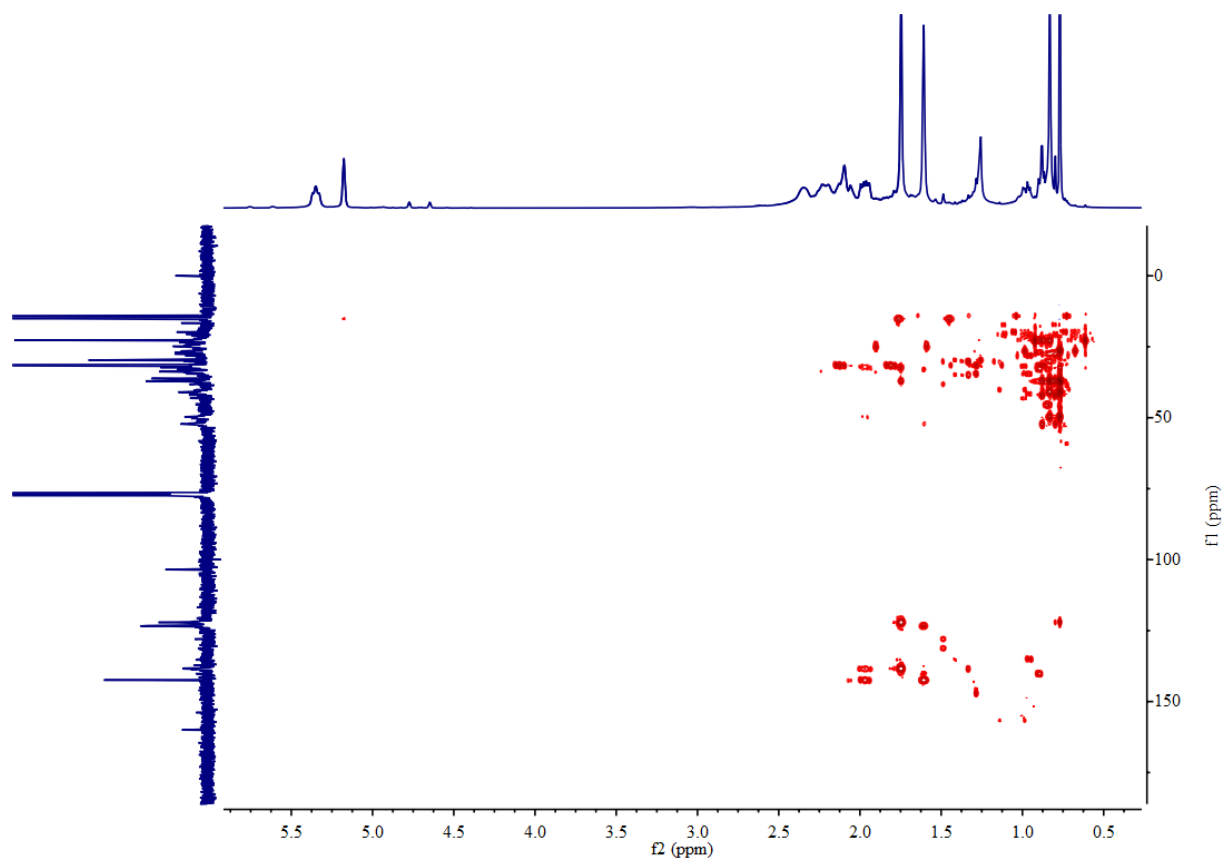

Figure S14 HMBC spectrum of **2** in CDCl<sub>3</sub> (400 MHz).

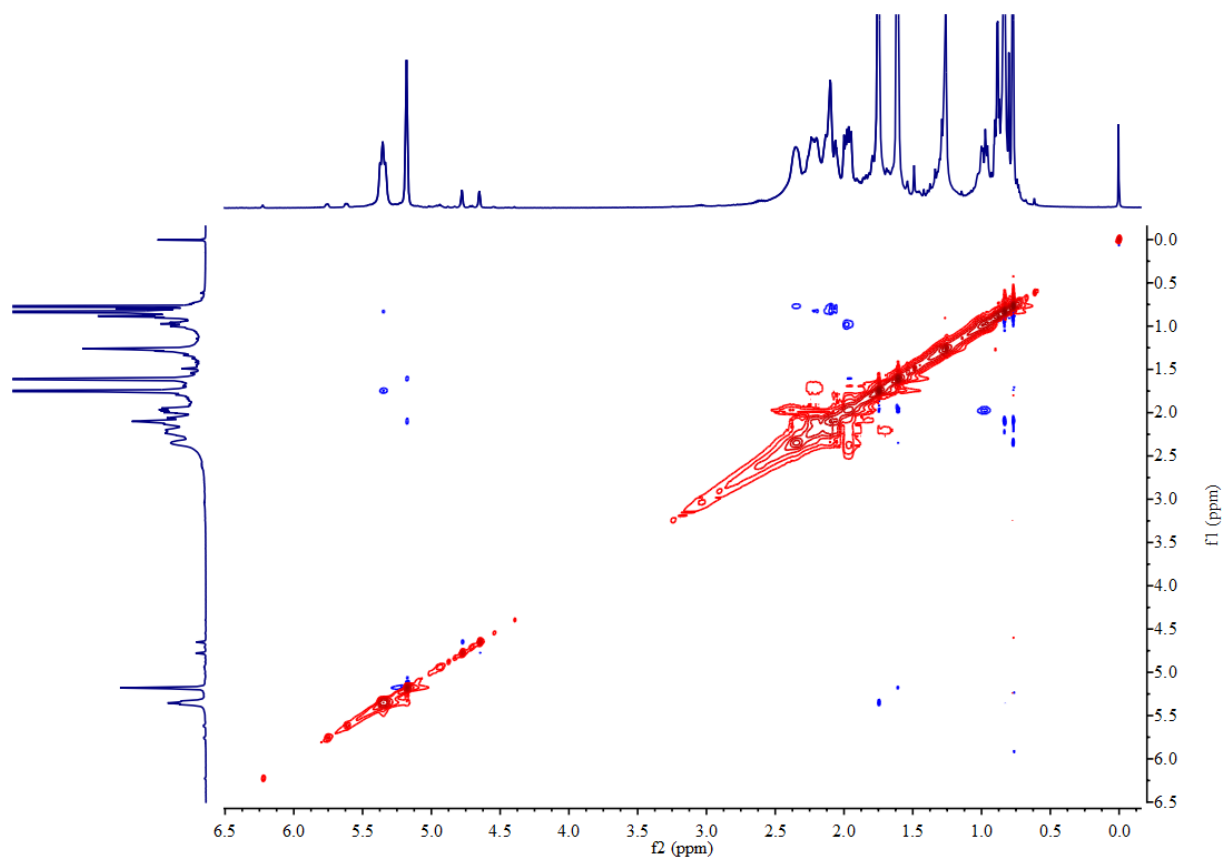

Figure S15 NOESY spectrum of **2** in CDCl<sub>3</sub> (400 MHz).



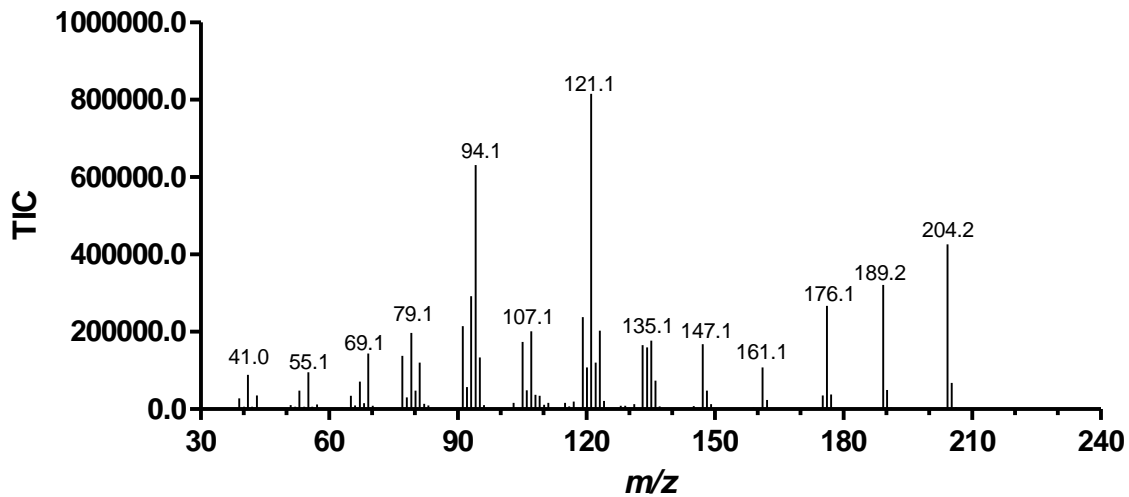

Figure S16 EI mass spectrum of 2.

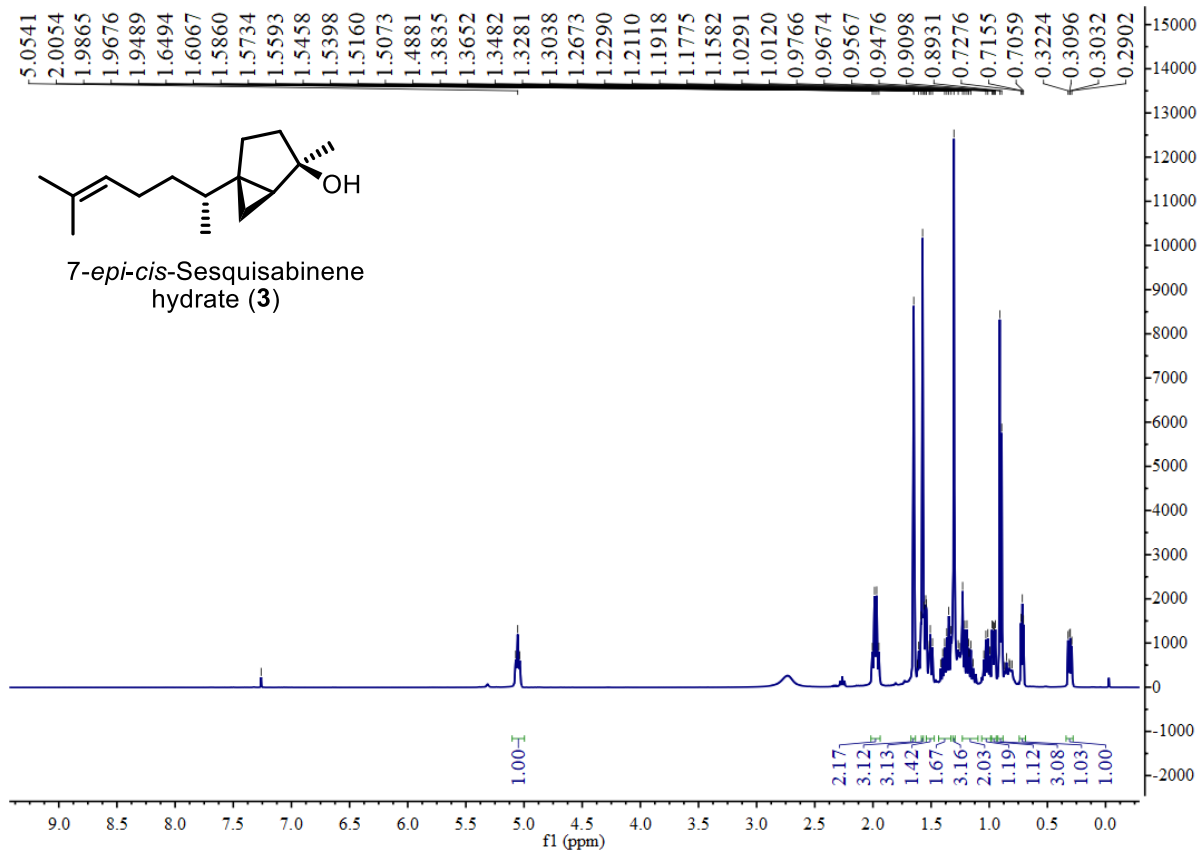

Figure S17 <sup>1</sup>H NMR spectrum of 3 in CDCl<sub>3</sub> (400 MHz).

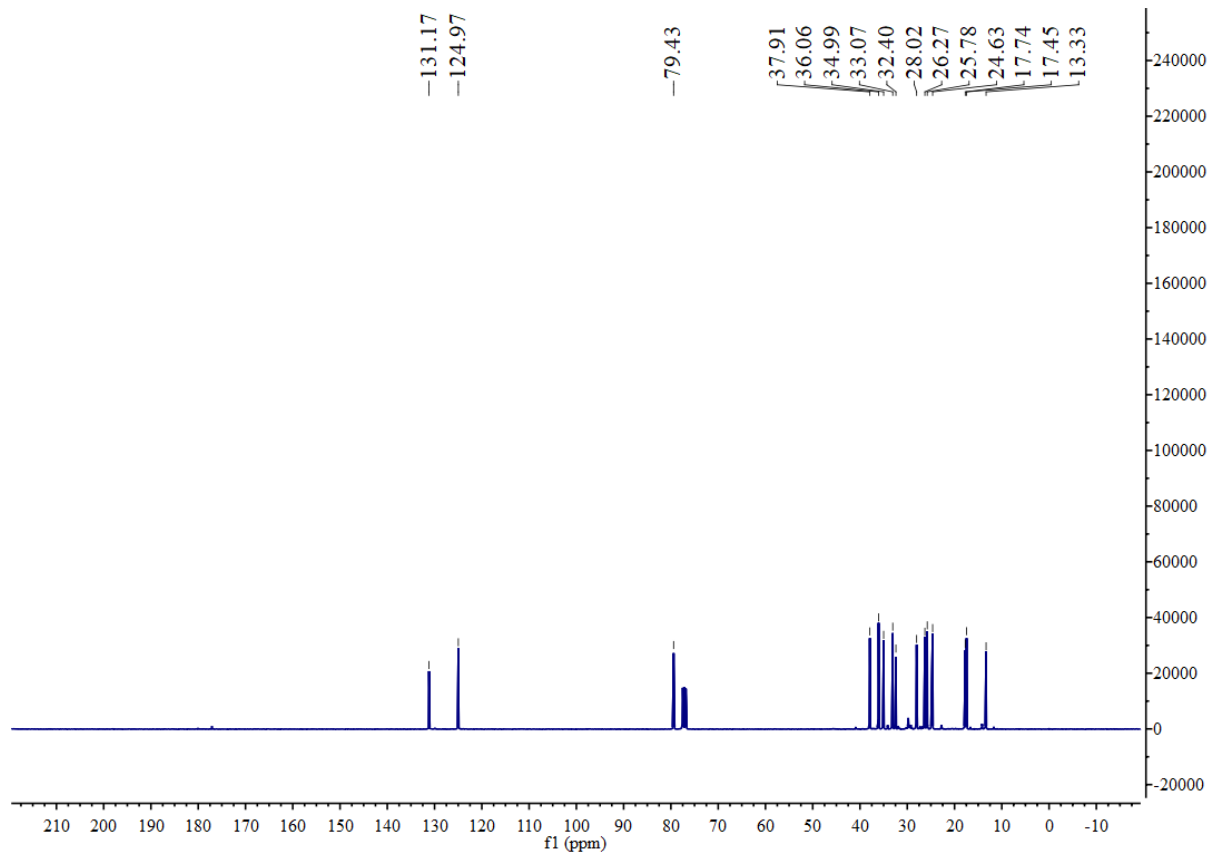

Figure S18  $^{13}\text{C}$  NMR spectrum of **3** in  $\text{CDCl}_3$  (100 MHz).

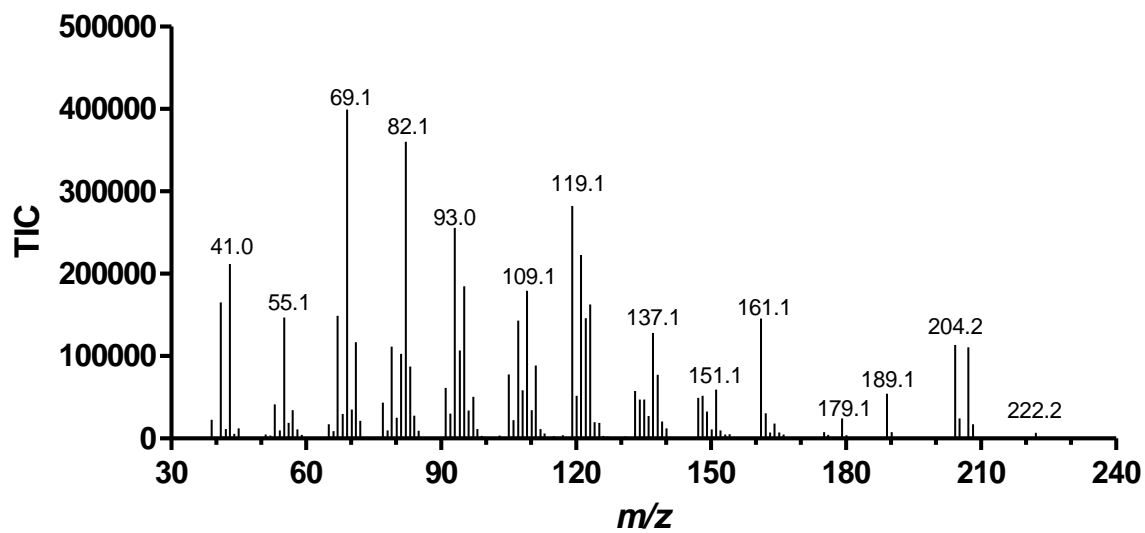

Figure S19 EI mass spectrum of **3**.

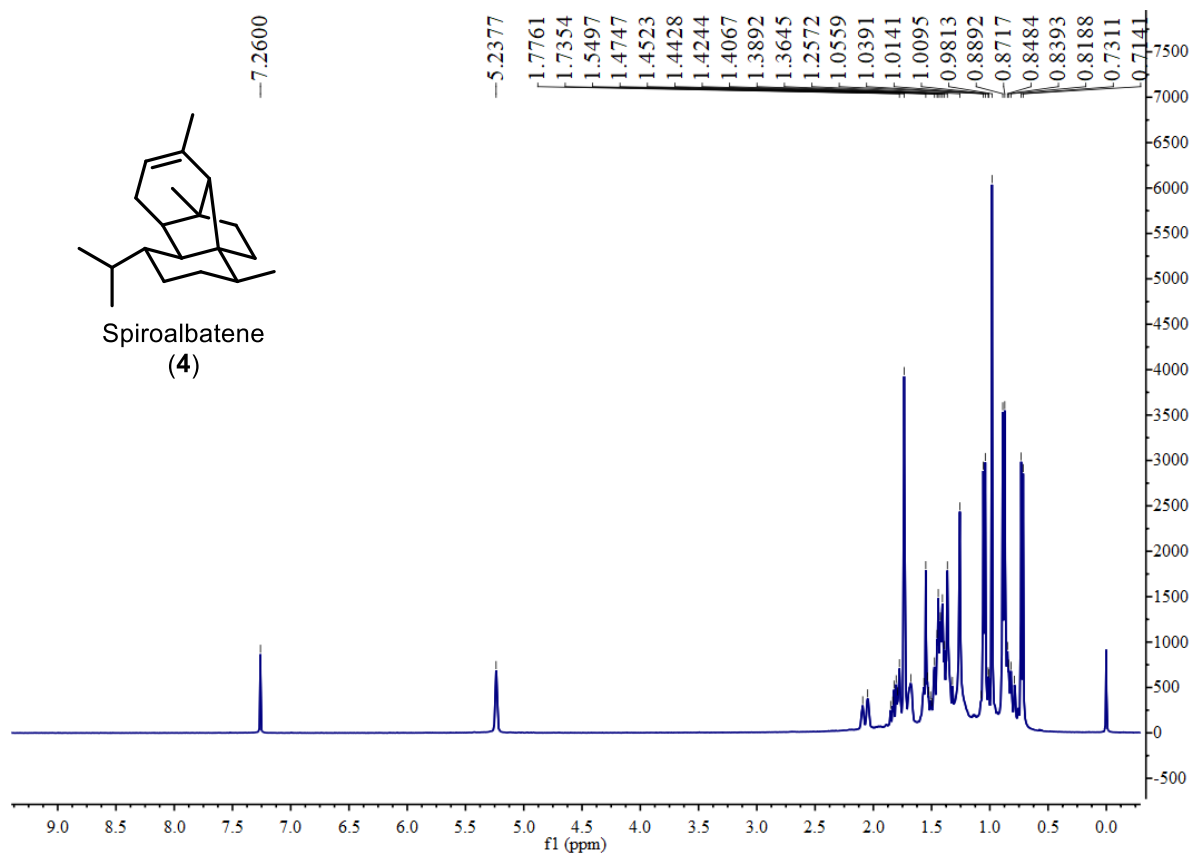

Figure S20 <sup>1</sup>H NMR spectrum of 4 in CDCl<sub>3</sub> (400 MHz).

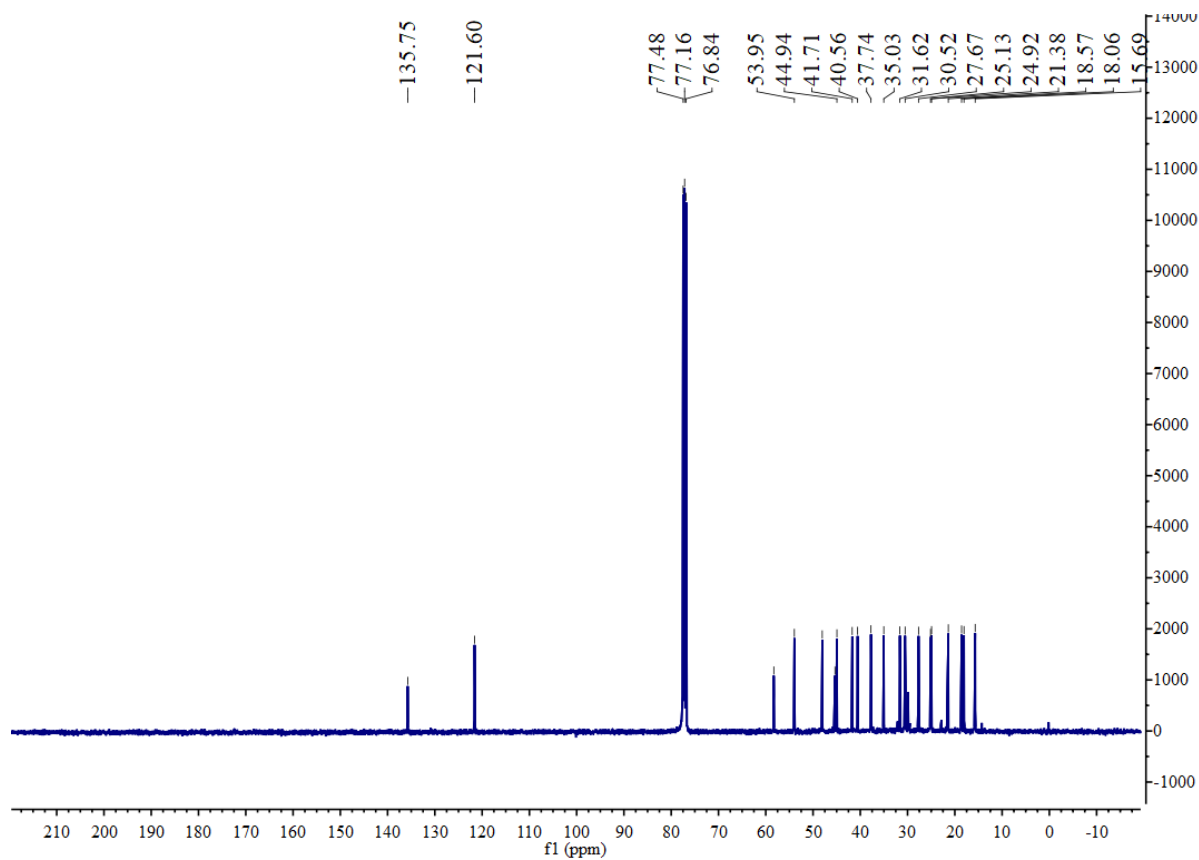

Figure S21 <sup>13</sup>C NMR spectrum of 4 in CDCl<sub>3</sub> (100 MHz).

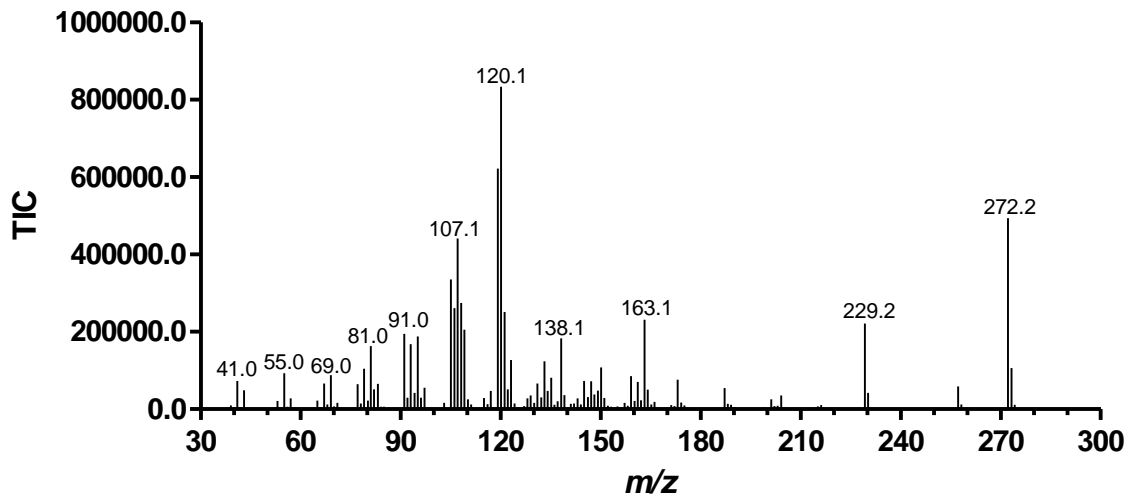

Figure S22 EI mass spectrum of 4.

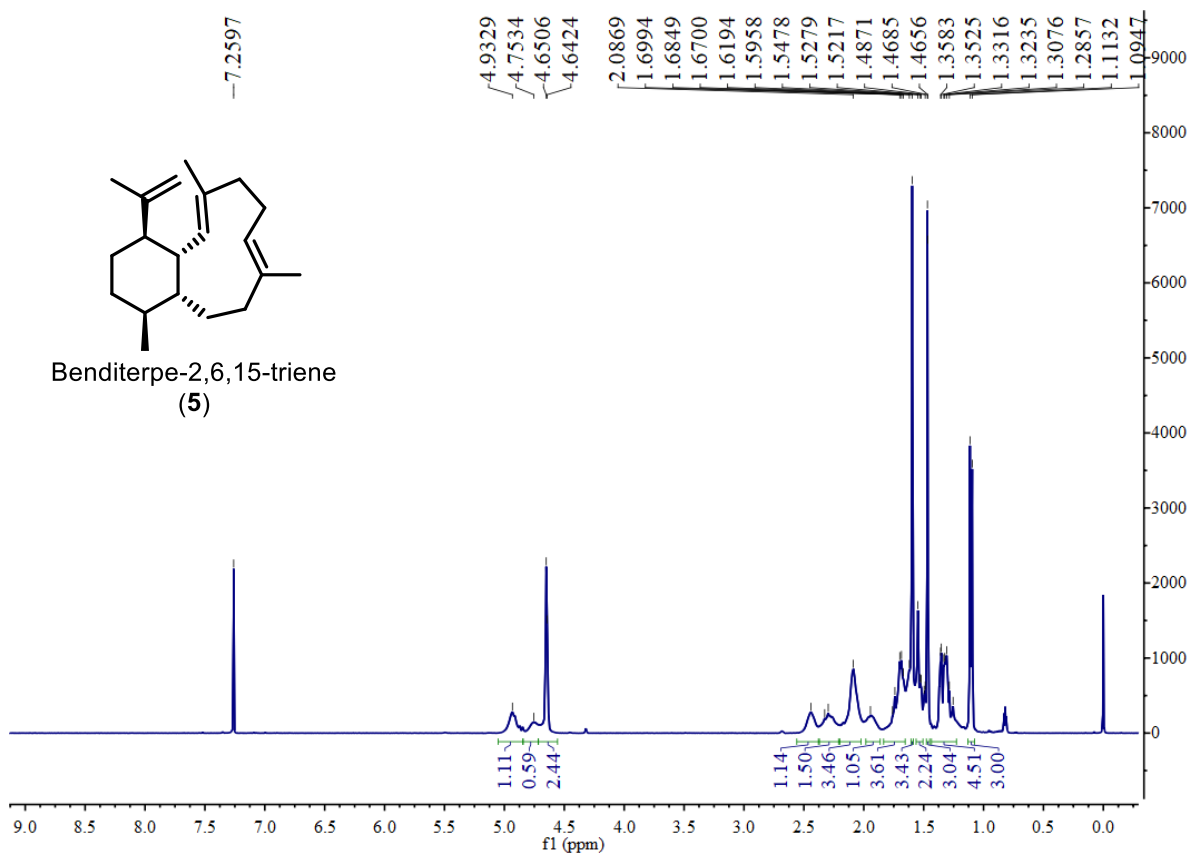

Figure S23 <sup>1</sup>H NMR spectrum of 5 in CDCl<sub>3</sub> (400 MHz).

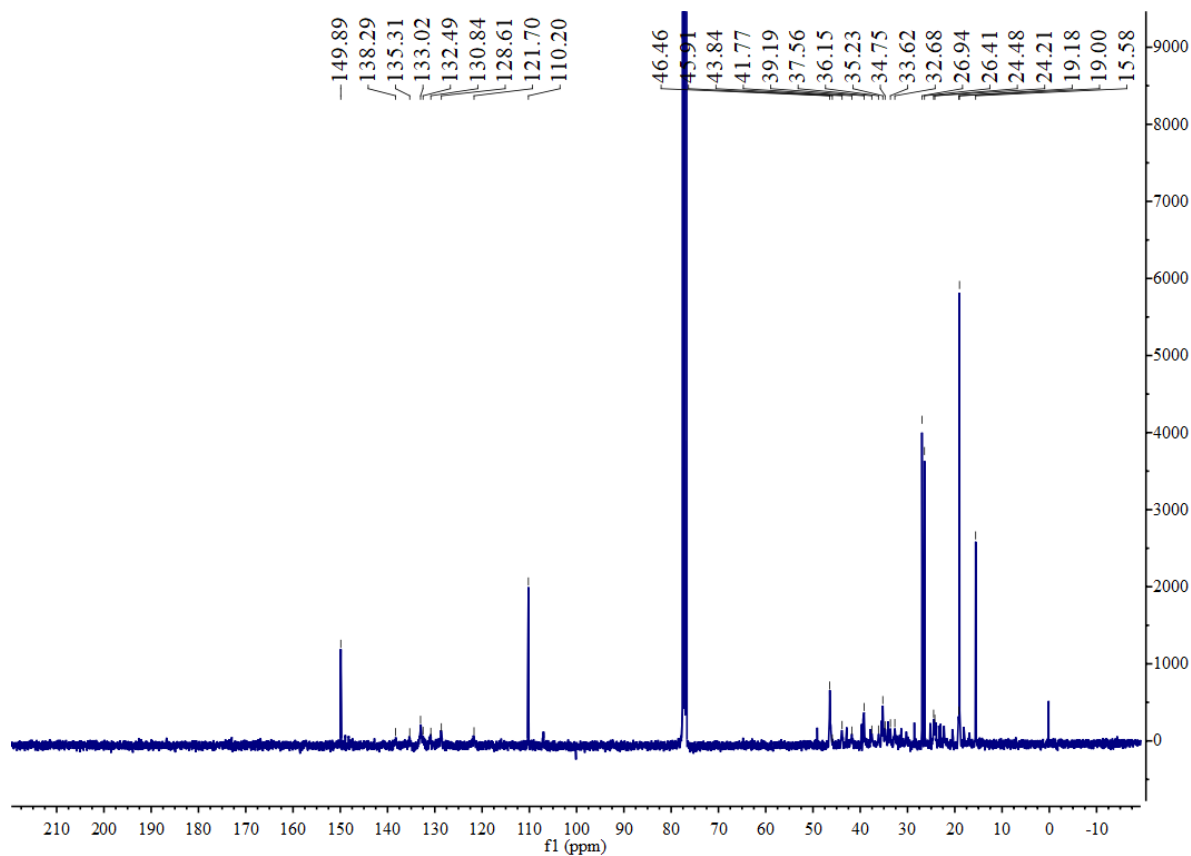

Figure S24  $^{13}\text{C}$  NMR spectrum of **5** in  $\text{CDCl}_3$  (100 MHz).

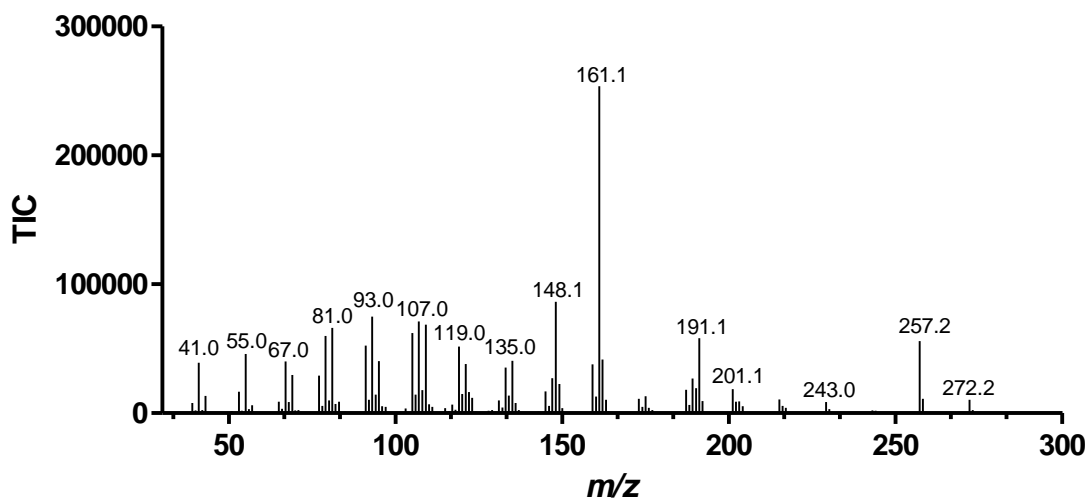

Figure S25 EI mass spectrum of **5**.

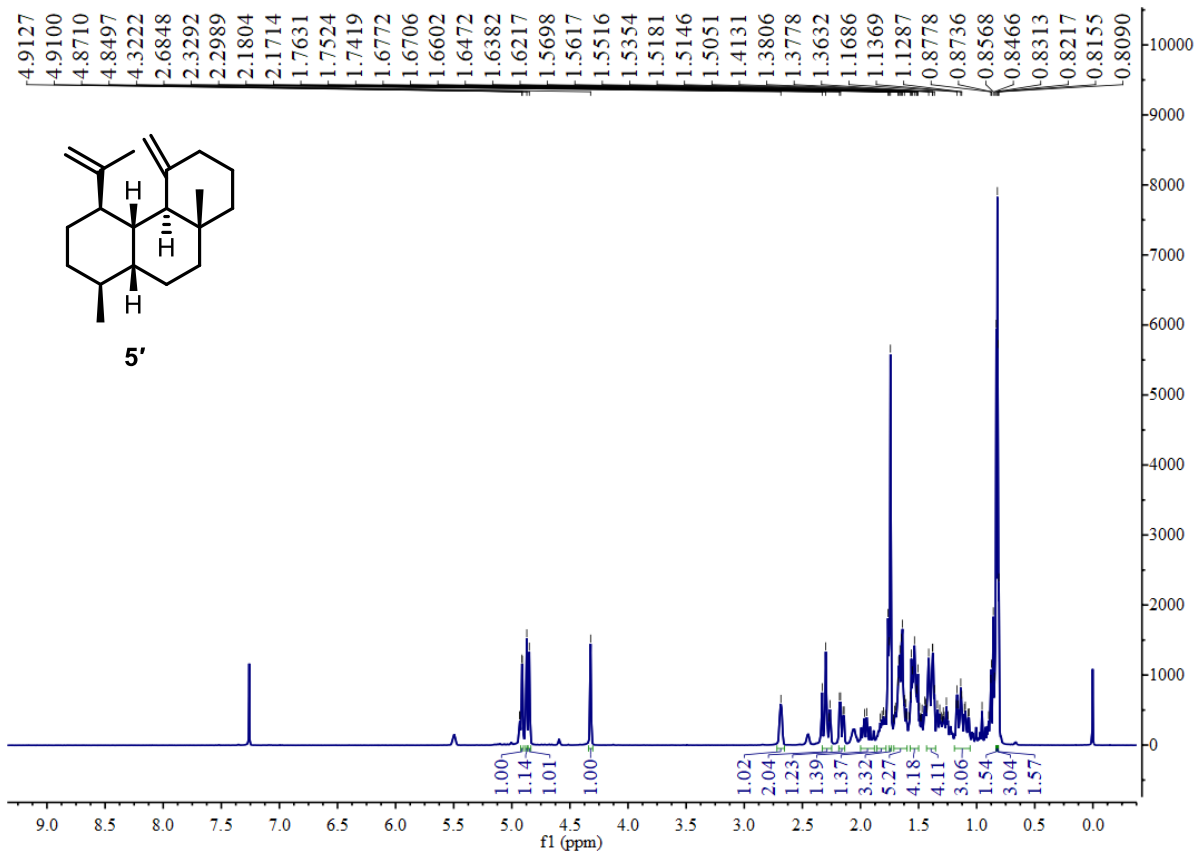

Figure S26 <sup>1</sup>H NMR spectrum of **5'** in CDCl<sub>3</sub> (400 MHz).

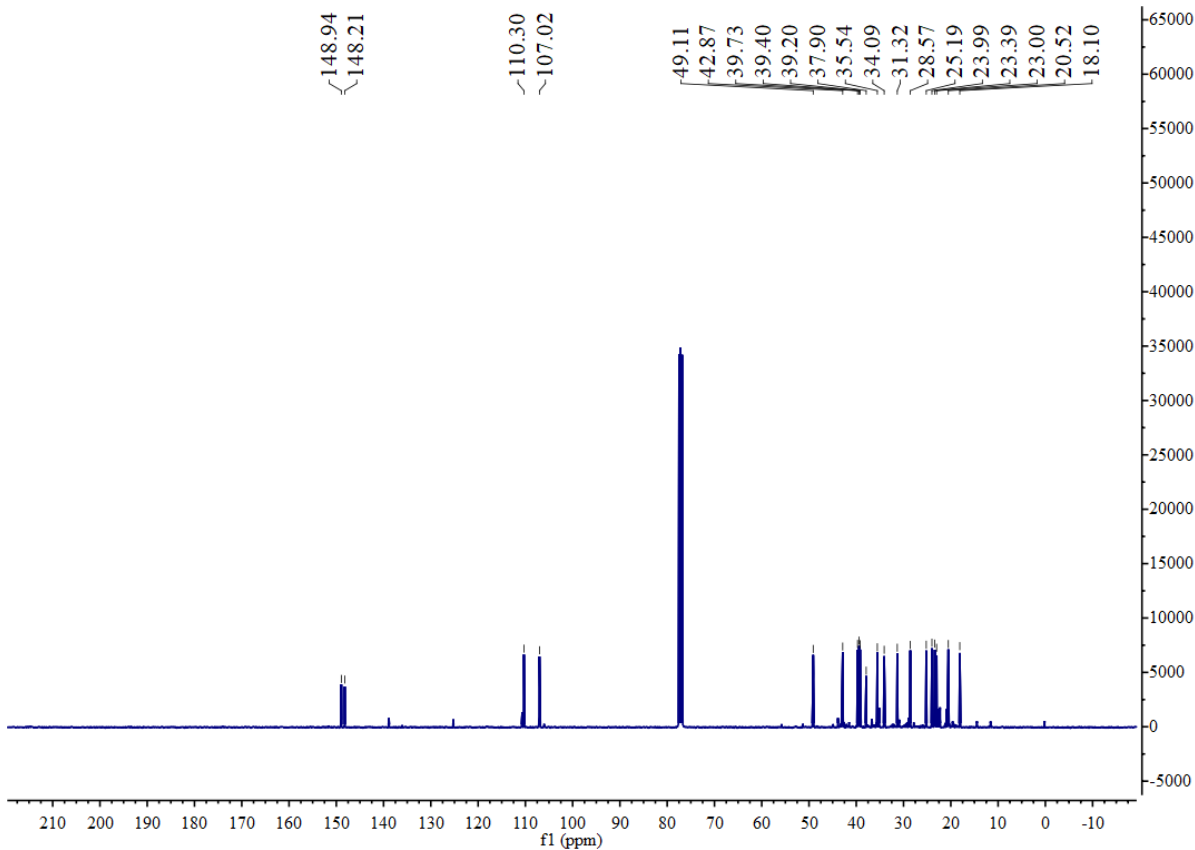

Figure S27 <sup>13</sup>C NMR spectrum of **5'** in CDCl<sub>3</sub> (100 MHz).

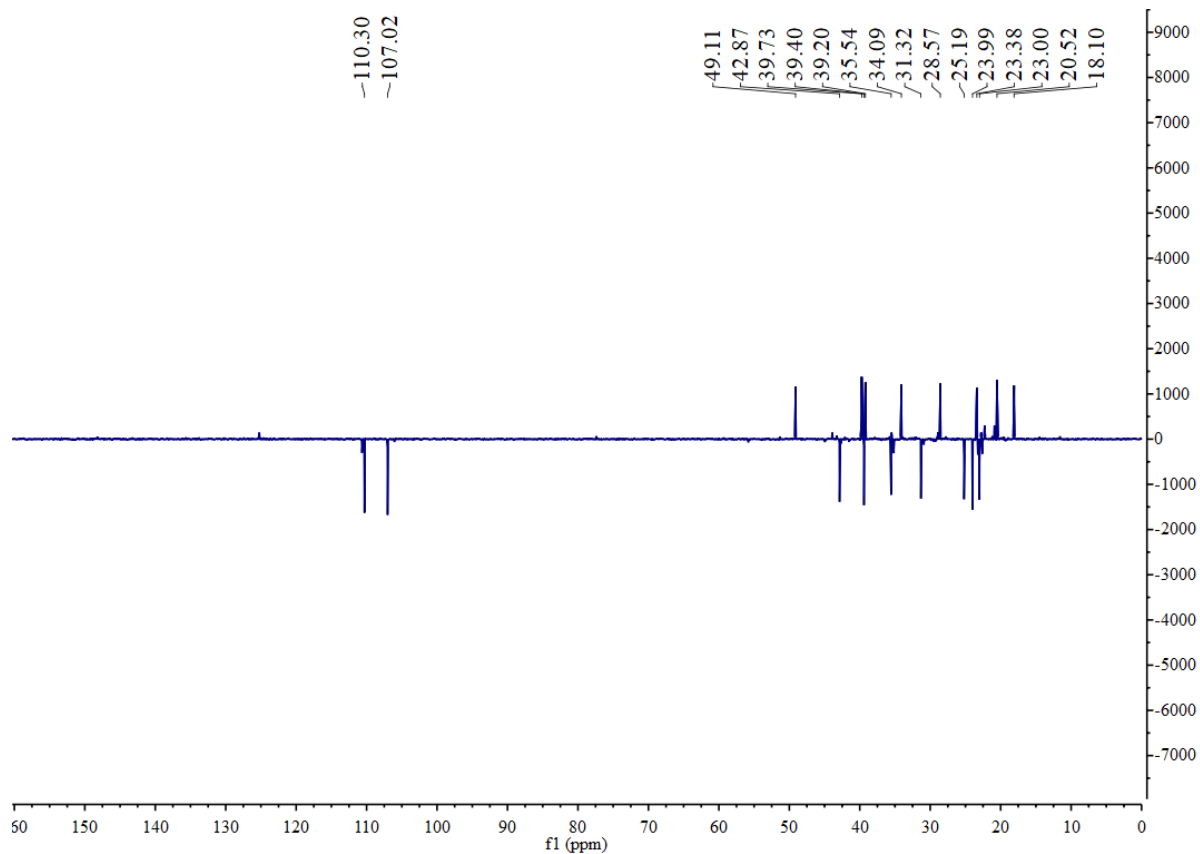

Figure S28 DEPT-135 NMR spectrum of **5'** in CDCl<sub>3</sub> (100 MHz).

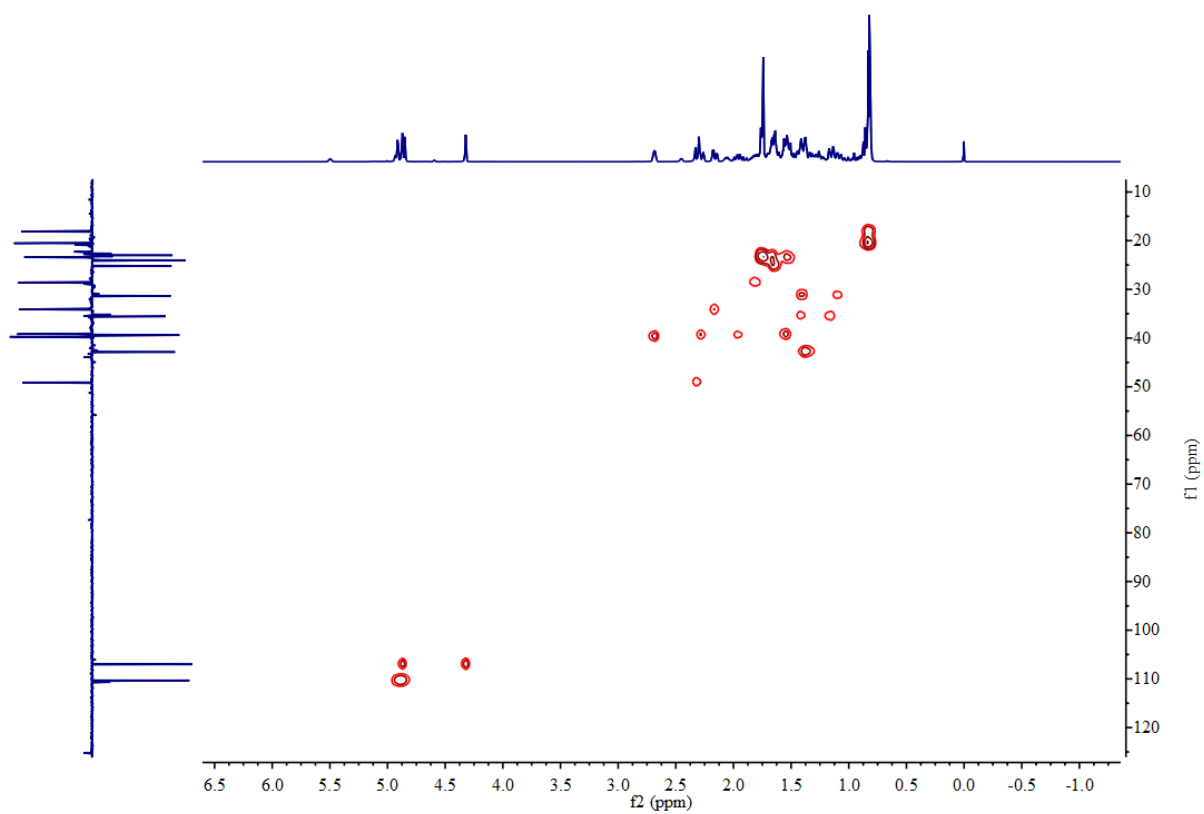

Figure S29 HSQC spectrum of **5'** in CDCl<sub>3</sub> (400 MHz).

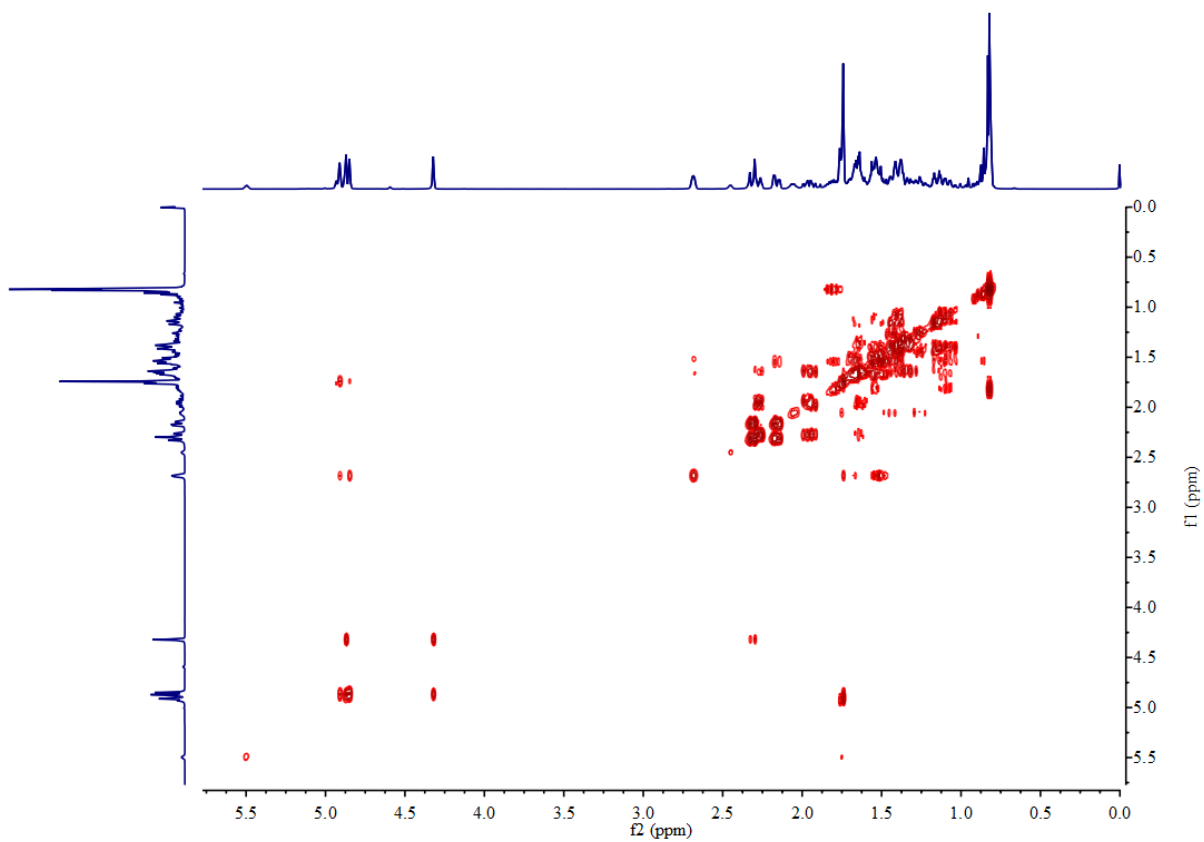

Figure S30  $^1\text{H}$ - $^1\text{H}$  COSY spectrum of **5'** in  $\text{CDCl}_3$  (400 MHz).

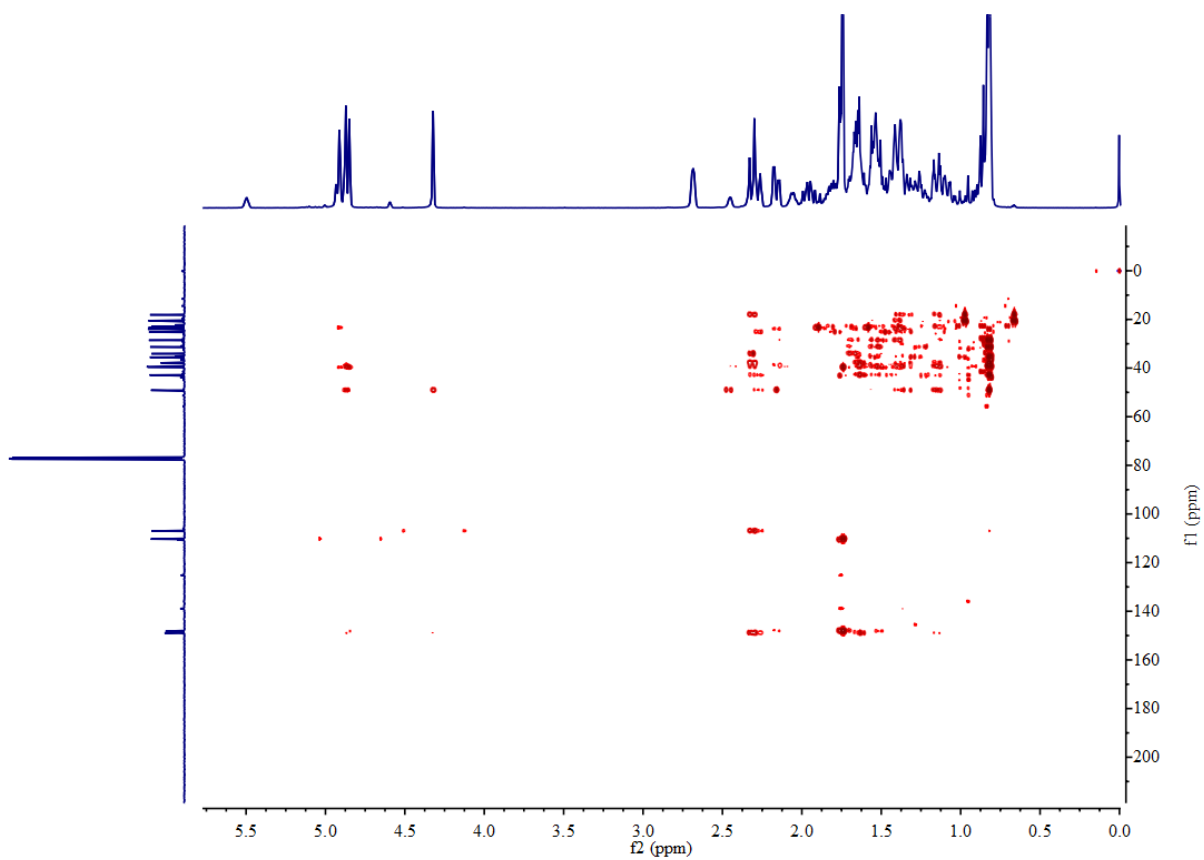

Figure S31 HMBC spectrum of **5'** in  $\text{CDCl}_3$  (400 MHz).



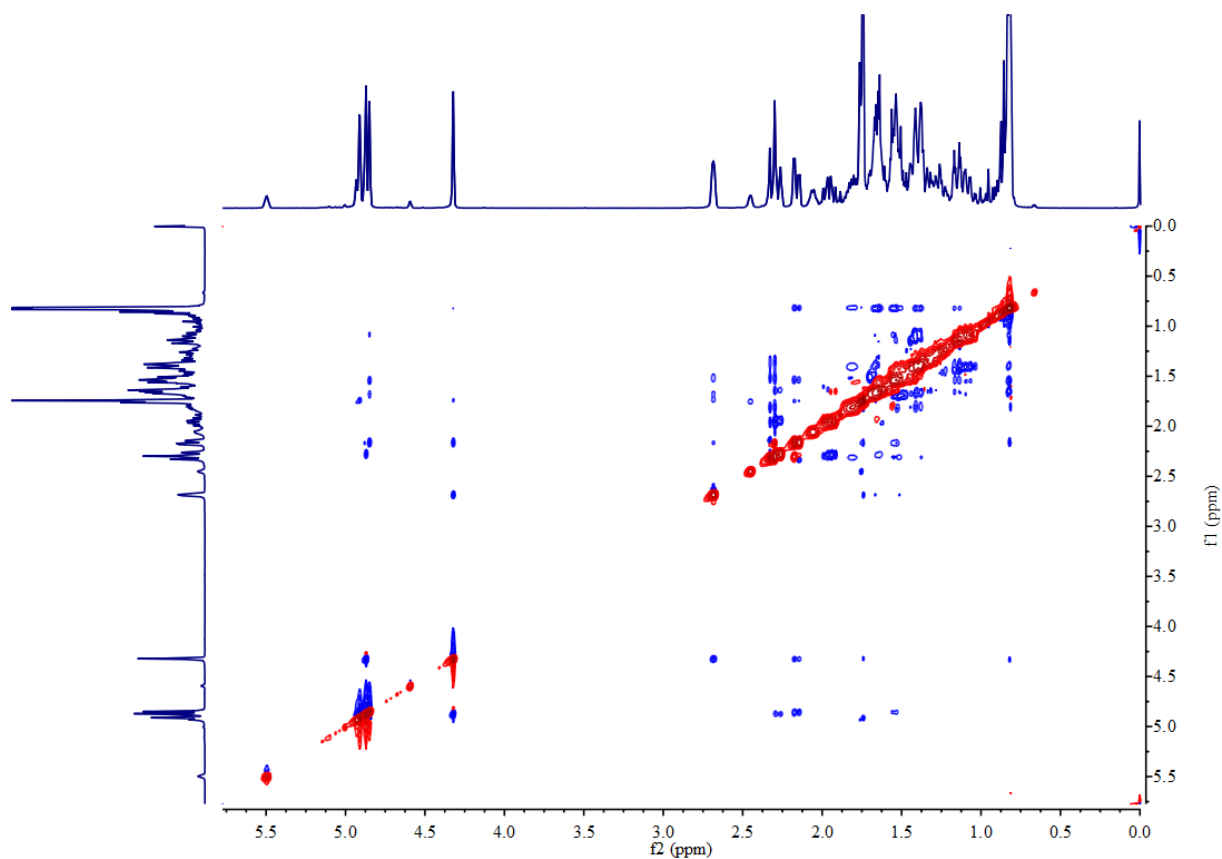

Figure S32 NOESY spectrum of **5'** in  $\text{CDCl}_3$  (400 MHz).

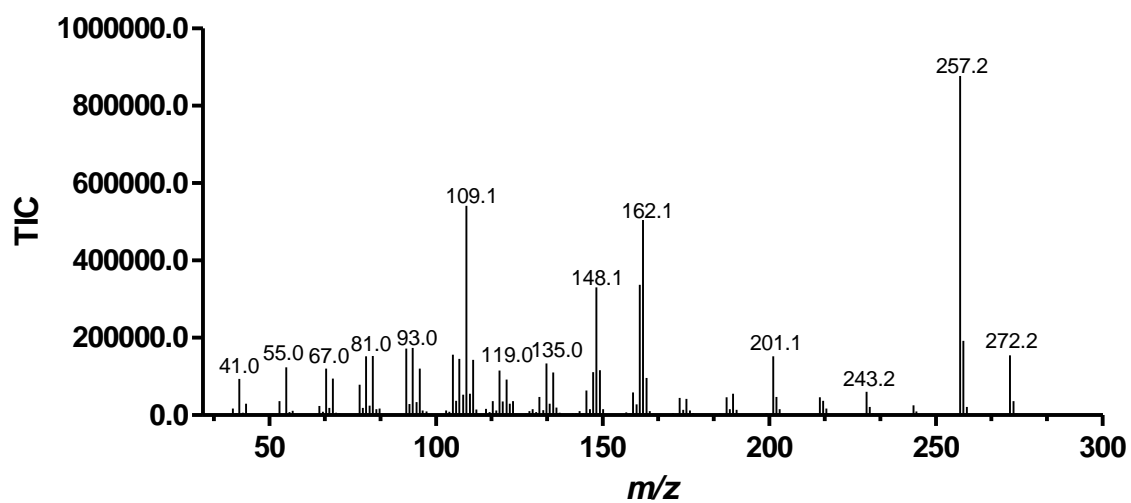

Figure S33 EI mass spectrum of **5'**.

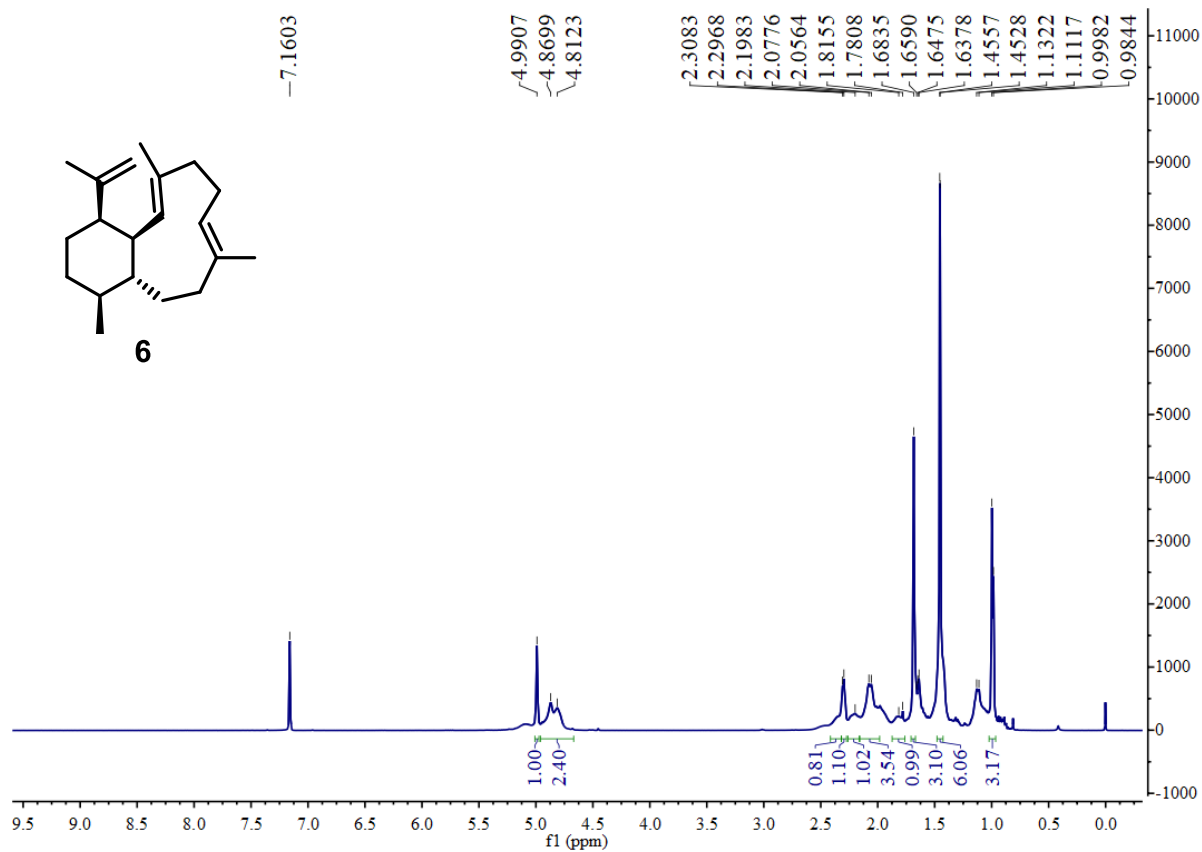

Figure S34 <sup>1</sup>H NMR spectrum of **6** in C<sub>6</sub>D<sub>6</sub> (400 MHz).

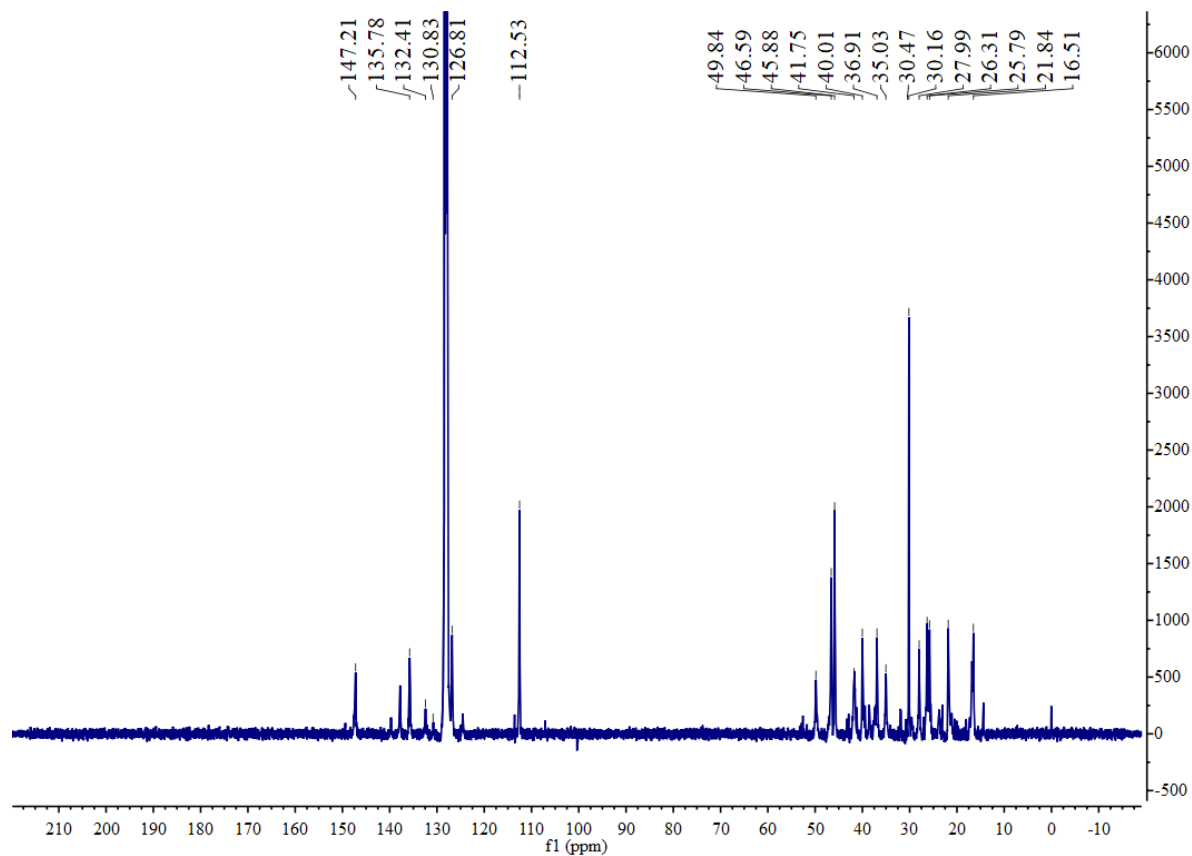

Figure S35 <sup>13</sup>C NMR spectrum of **6** in C<sub>6</sub>D<sub>6</sub> (100 MHz).

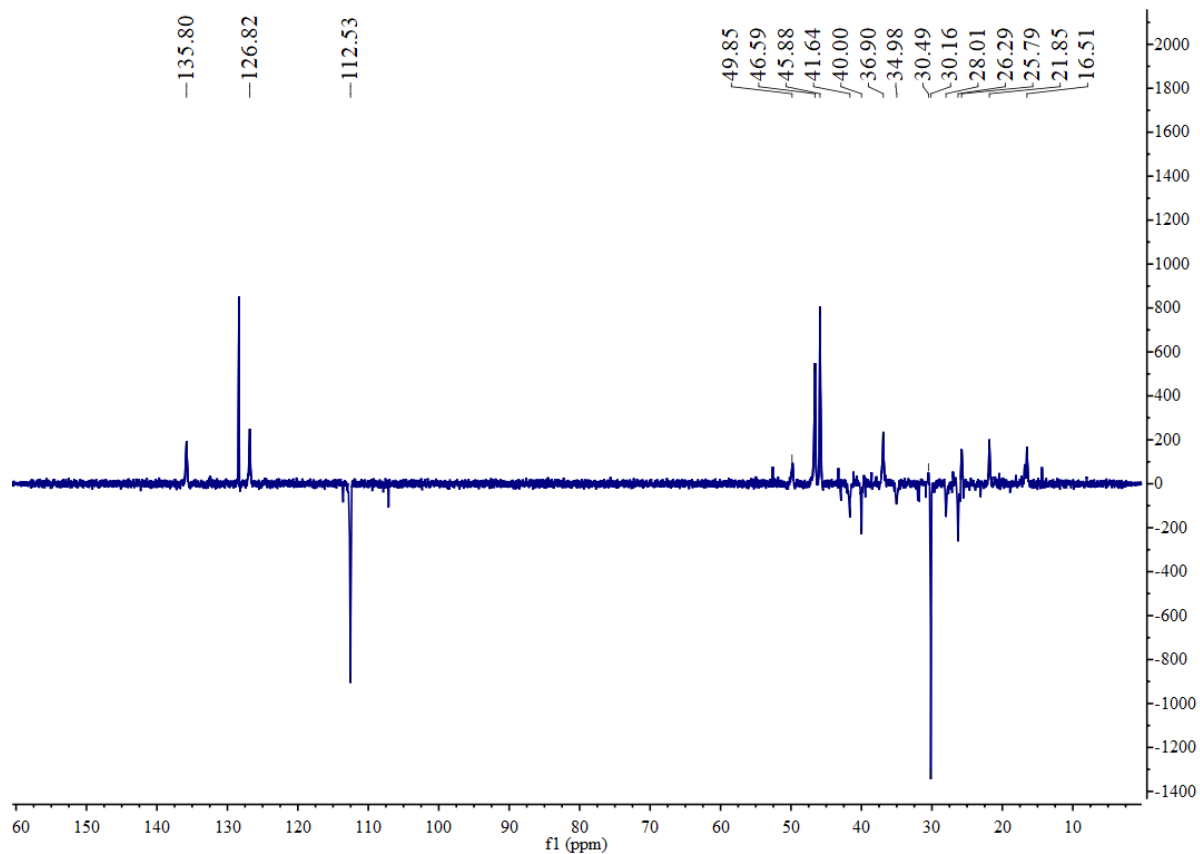

Figure S36 DEPT-135 NMR spectrum of **6** in C<sub>6</sub>D<sub>6</sub> (100 MHz).

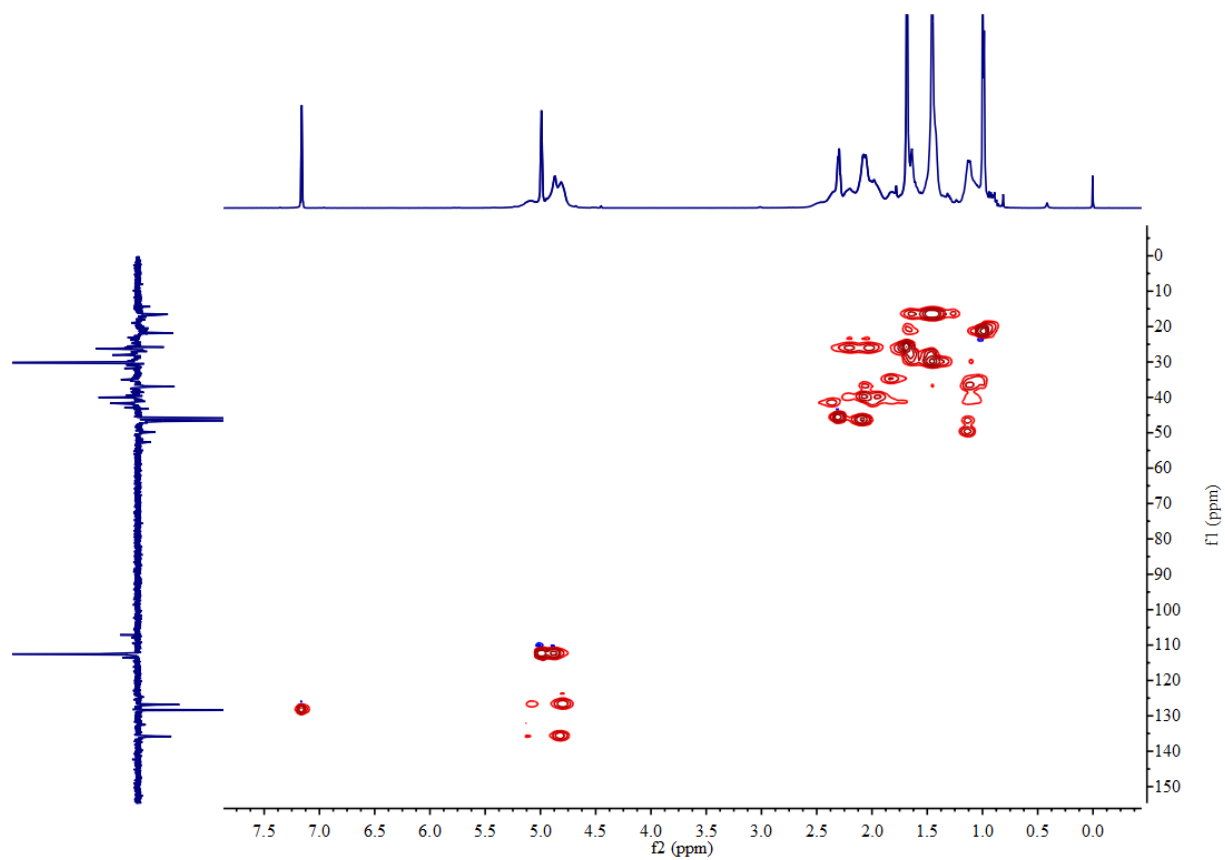

Figure S37 HSQC spectrum of **6** in C<sub>6</sub>D<sub>6</sub> (400 MHz).

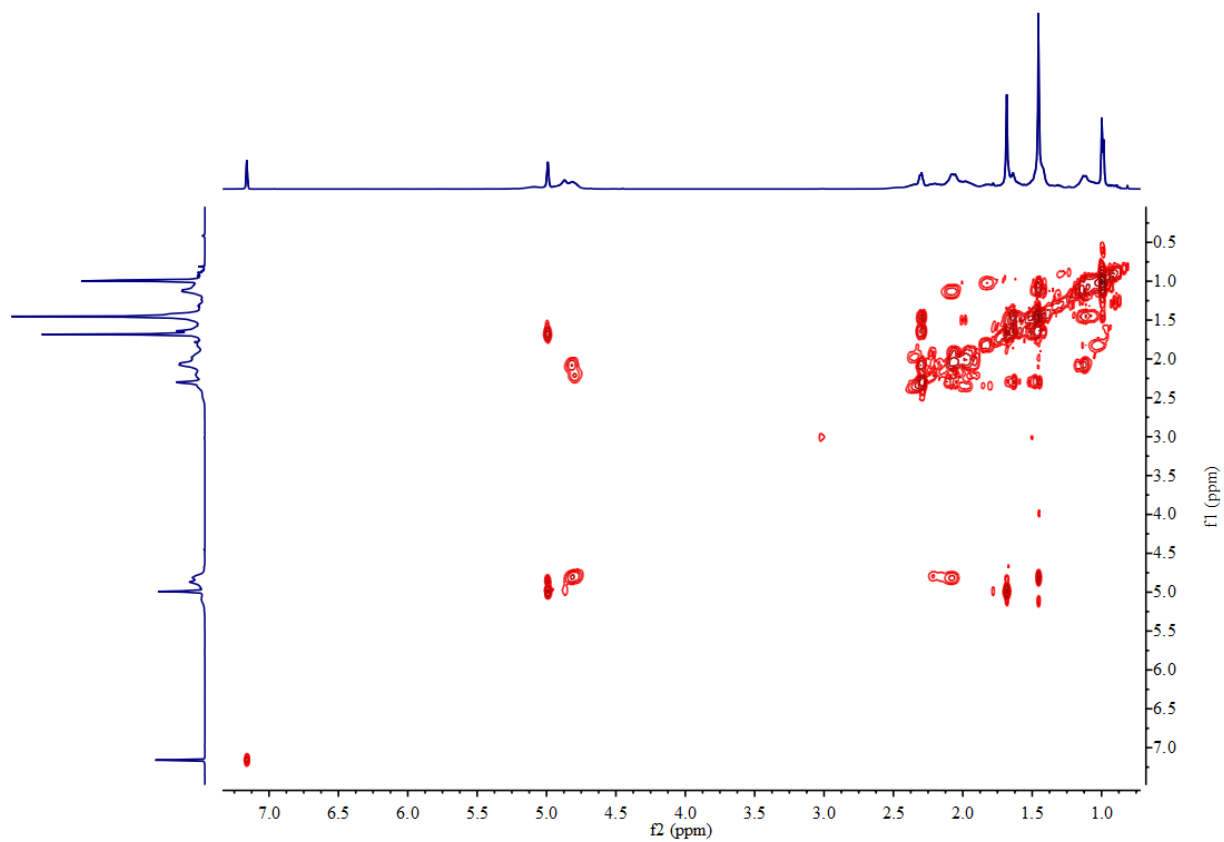

Figure S38  $^1\text{H}$ - $^1\text{H}$  COSY spectrum of **6** in  $\text{C}_6\text{D}_6$  (400 MHz).

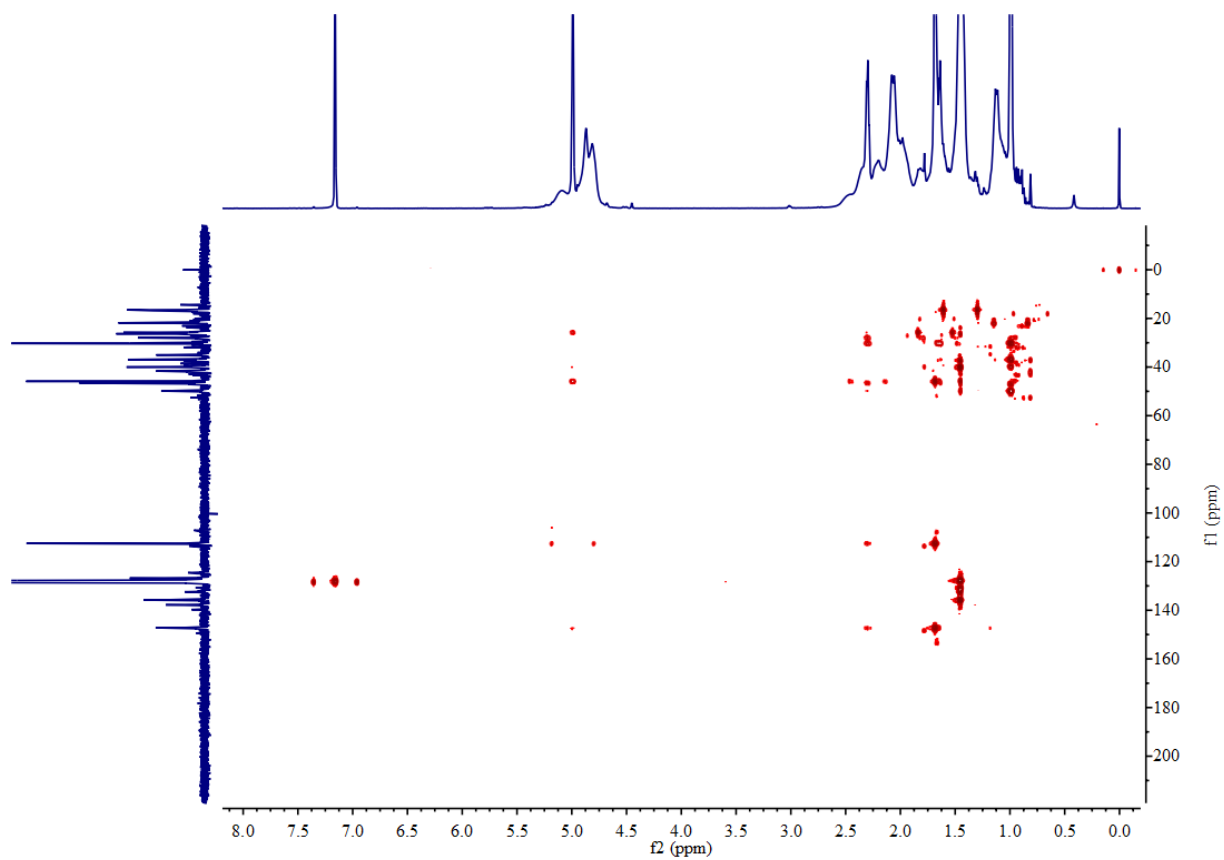

Figure S39 HMBC spectrum of **6** in  $\text{C}_6\text{D}_6$  (400 MHz).

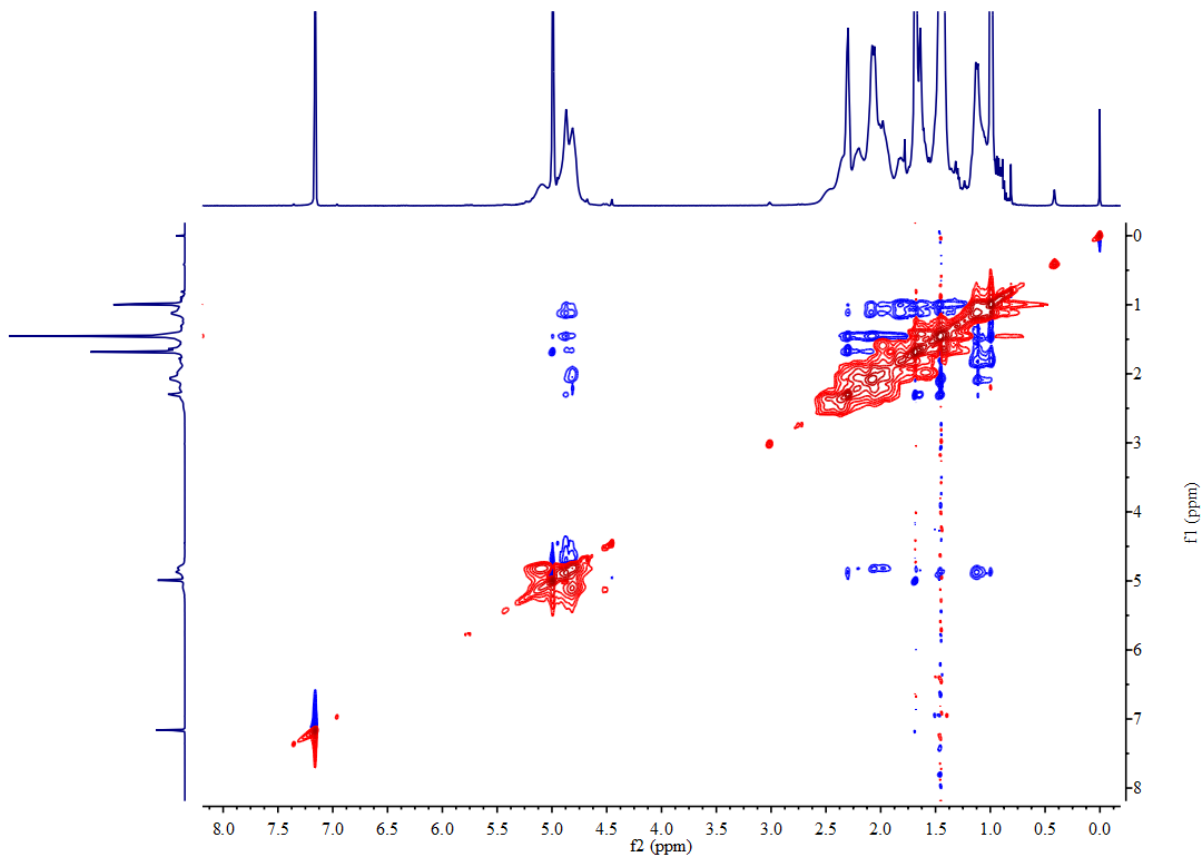

Figure S40 NOESY spectrum of **6** in C<sub>6</sub>D<sub>6</sub> (400 MHz).

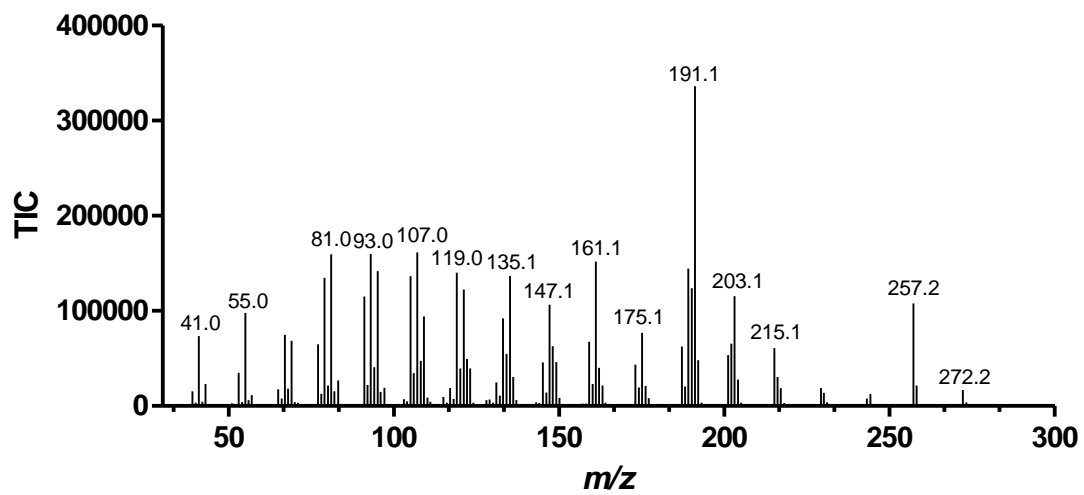

Figure S41 EI mass spectrum of **6**.

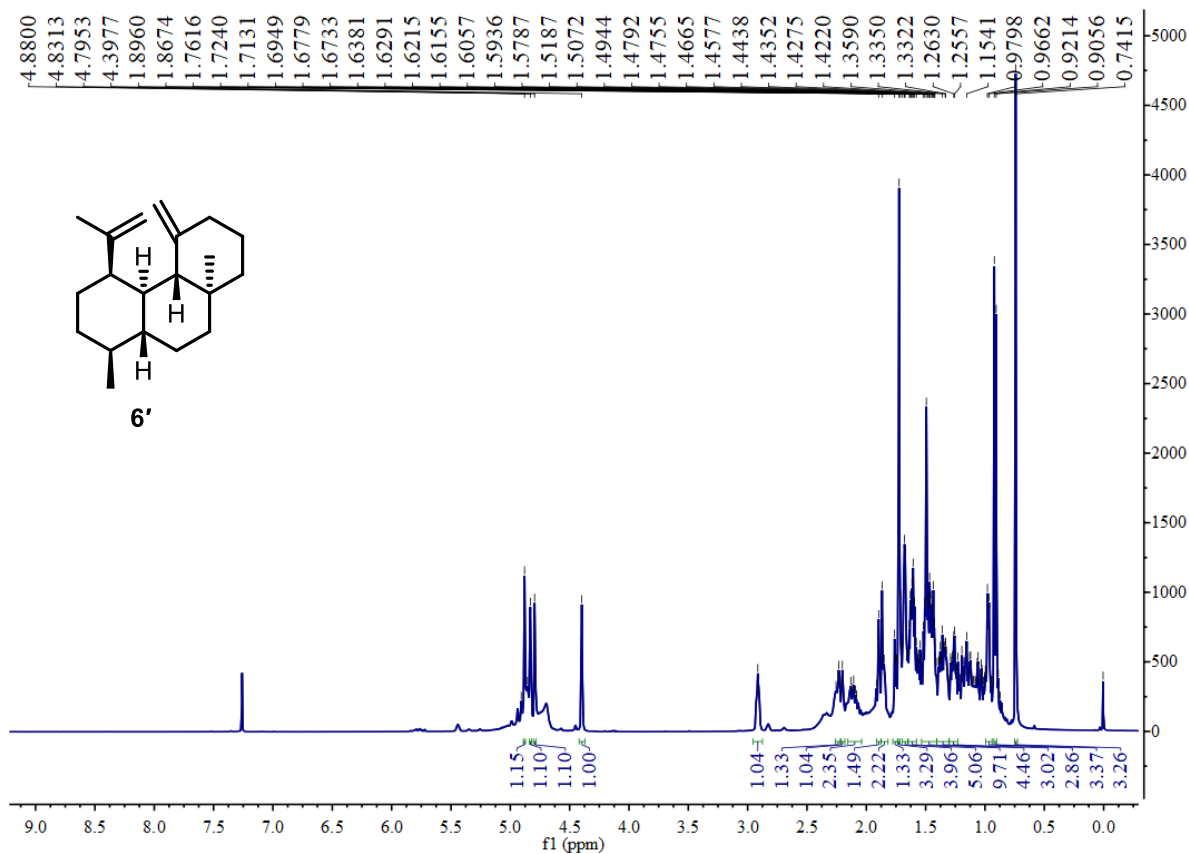

Figure S42 <sup>1</sup>H NMR spectrum of **6'** in CDCl<sub>3</sub> (400 MHz).

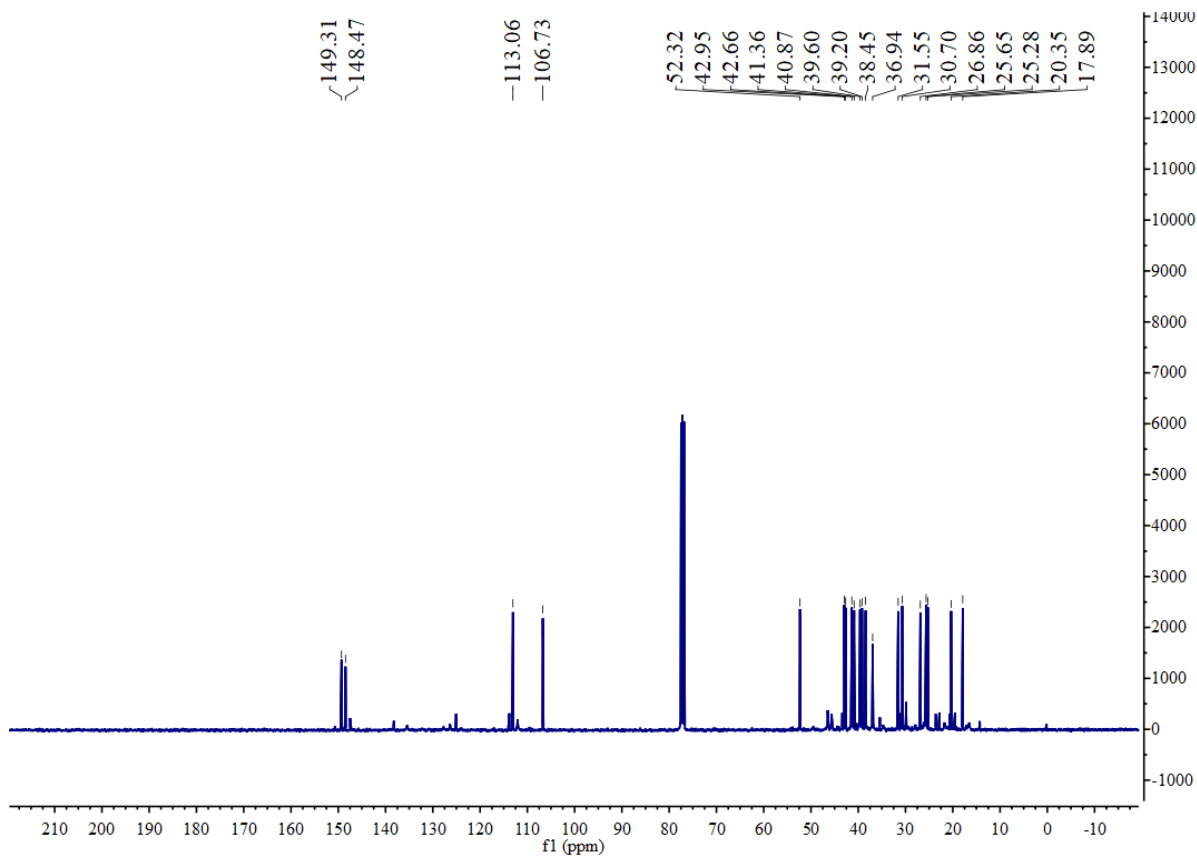

Figure S43 <sup>13</sup>C NMR spectrum of **6'** in CDCl<sub>3</sub> (100 MHz).

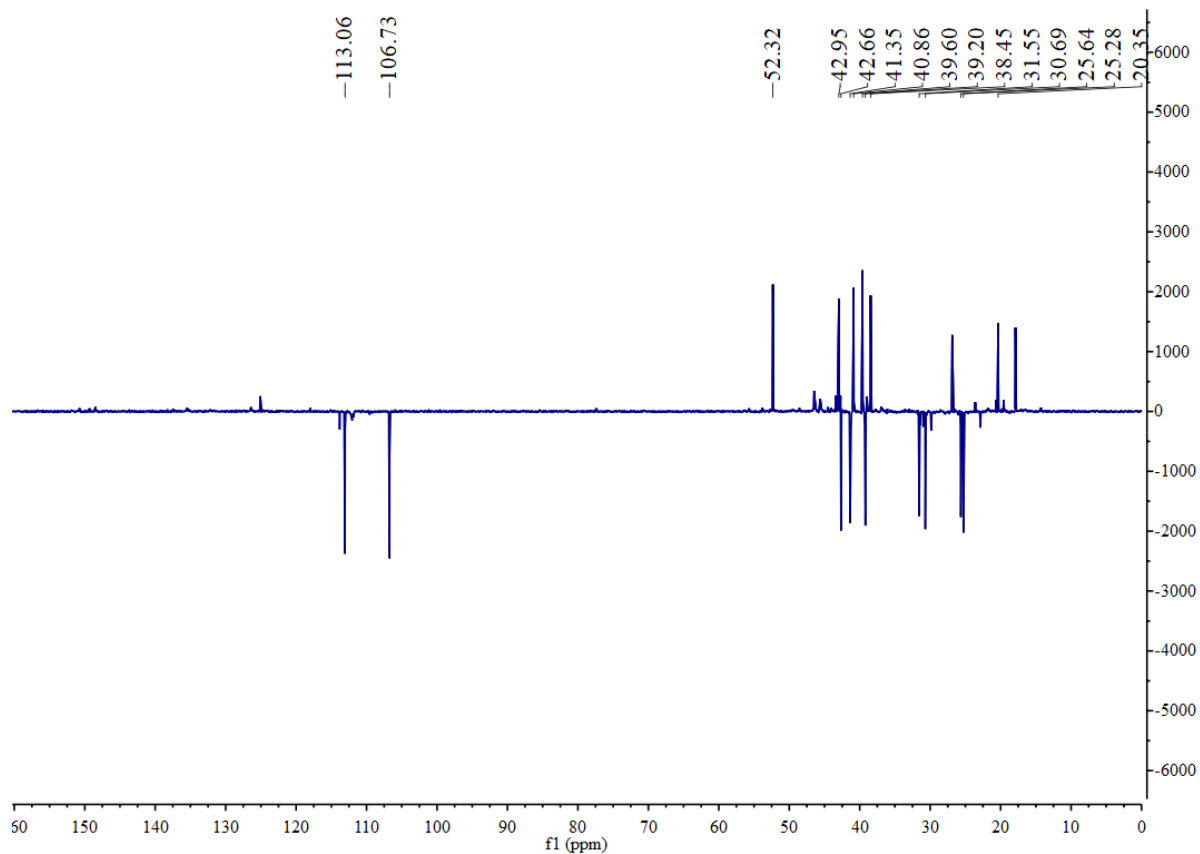

**Figure S44** DEPT-135 NMR spectrum of **6'** in CDCl<sub>3</sub> (100 MHz).

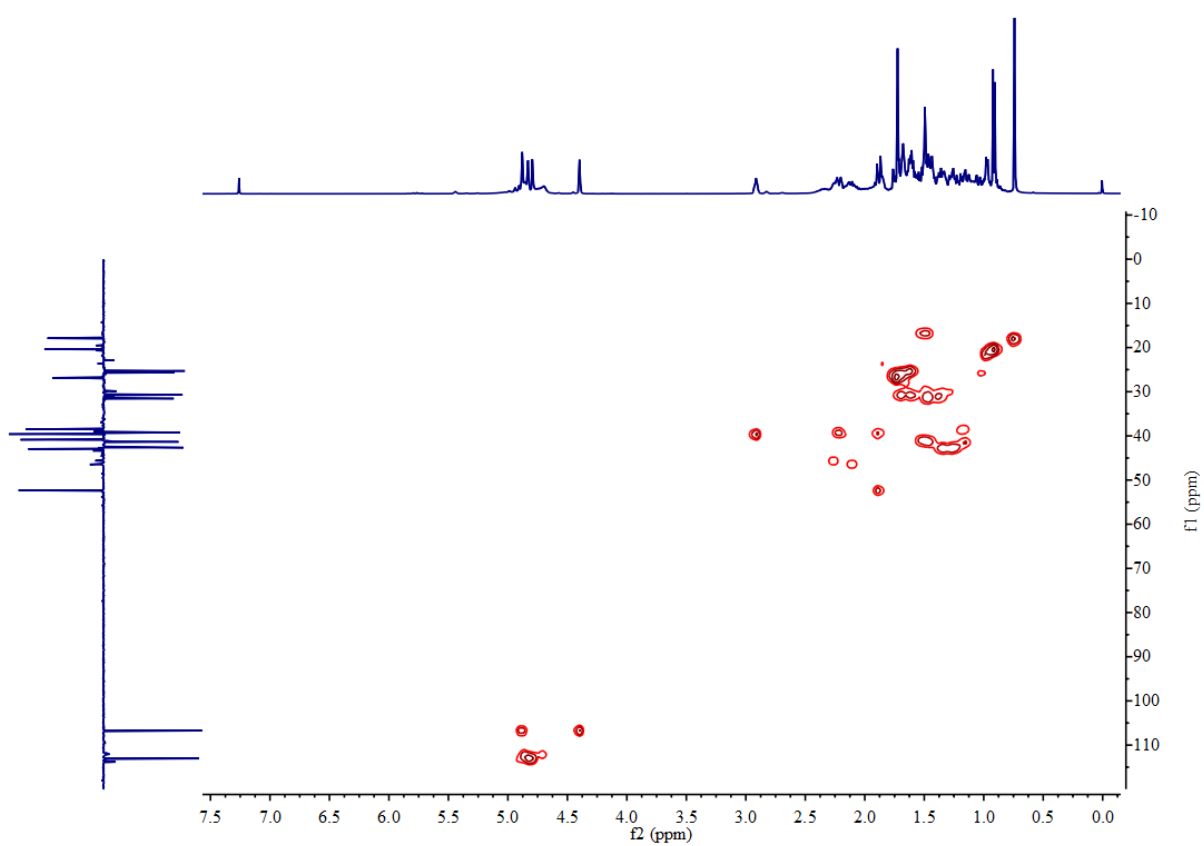

**Figure S45** HSQC spectrum of **6'** in CDCl<sub>3</sub> (400 MHz).

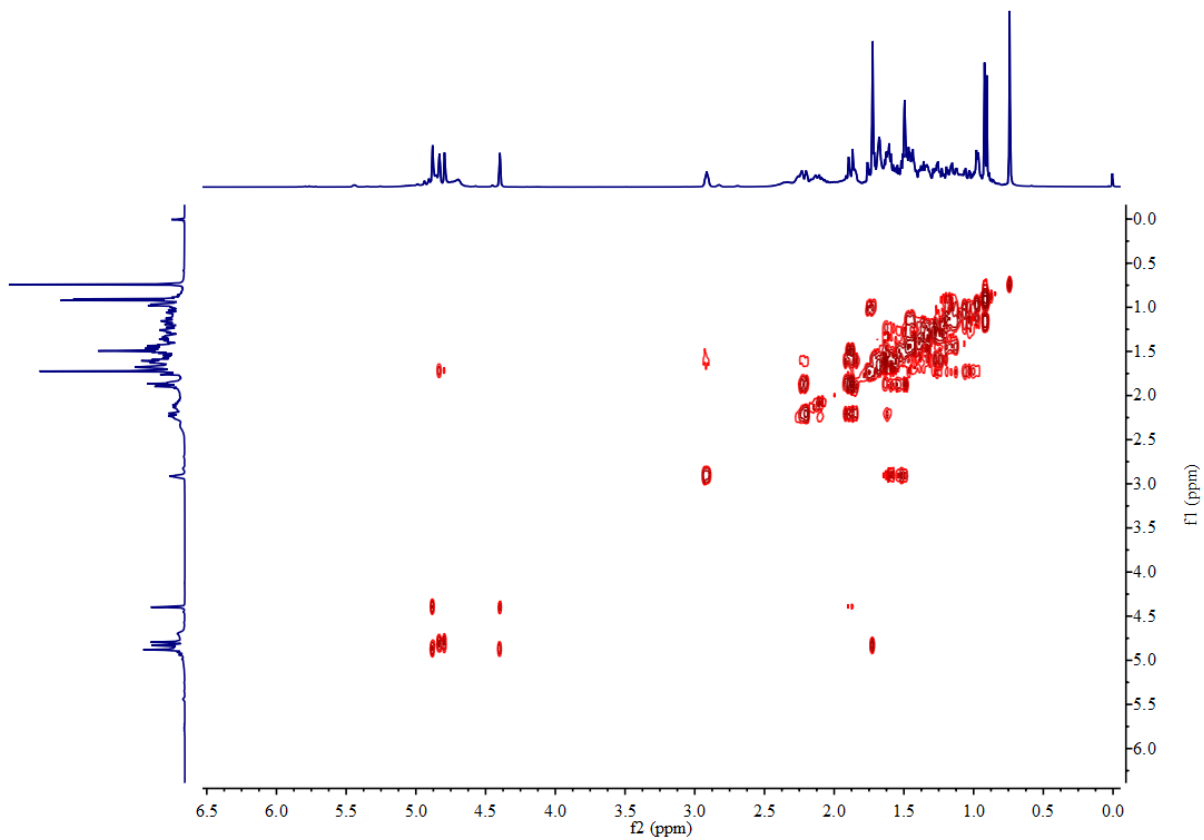

Figure S46  $^1\text{H}$ - $^1\text{H}$  COSY spectrum of **6'** in  $\text{CDCl}_3$  (400 MHz).

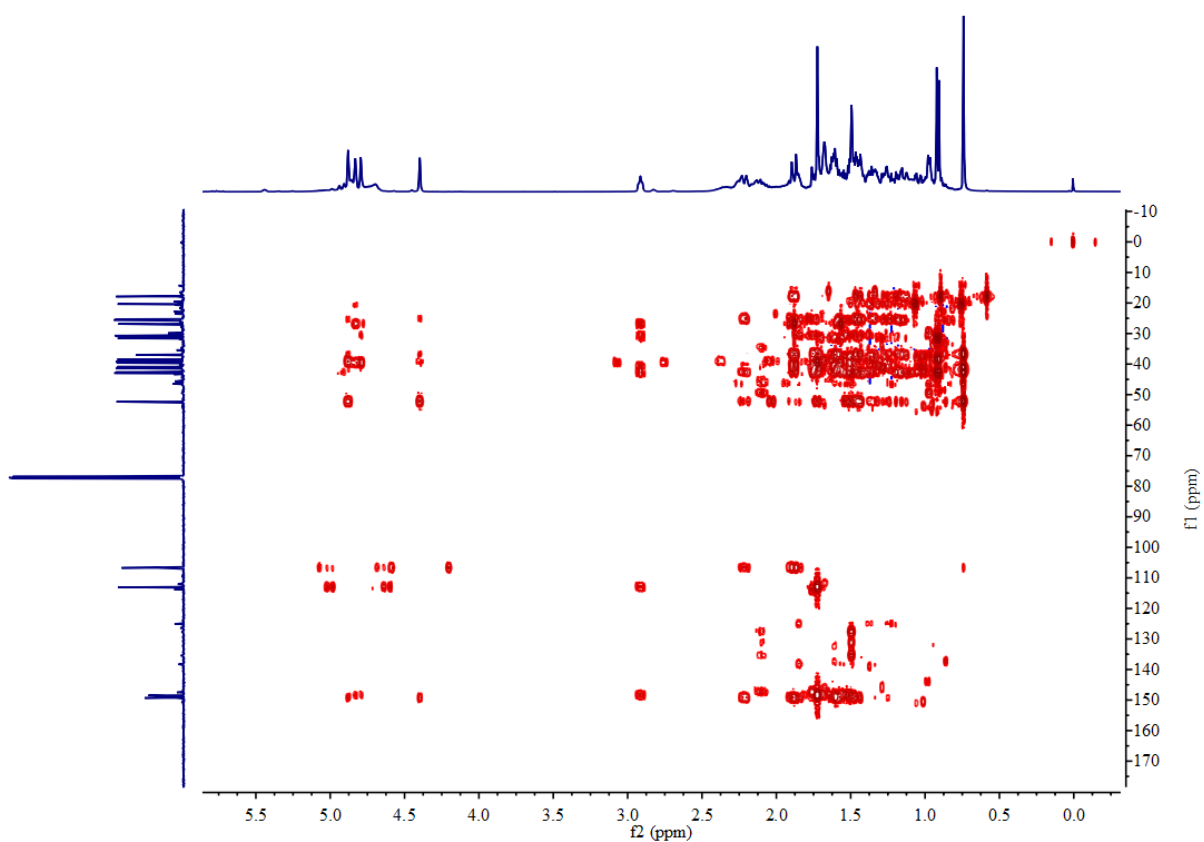

Figure S47 HMBC spectrum of **6'** in  $\text{CDCl}_3$  (400 MHz).



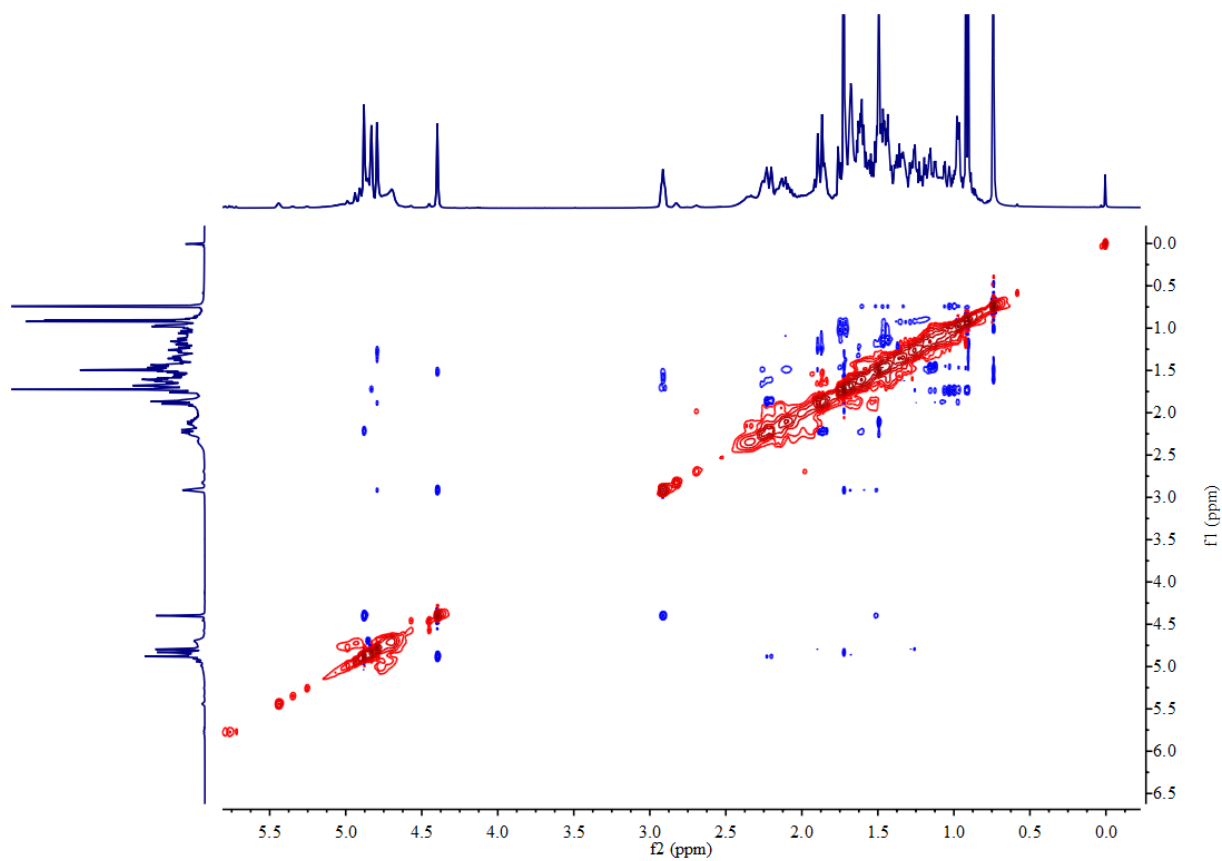

Figure S48 NOESY spectrum of **6'** in  $\text{CDCl}_3$  (400 MHz).

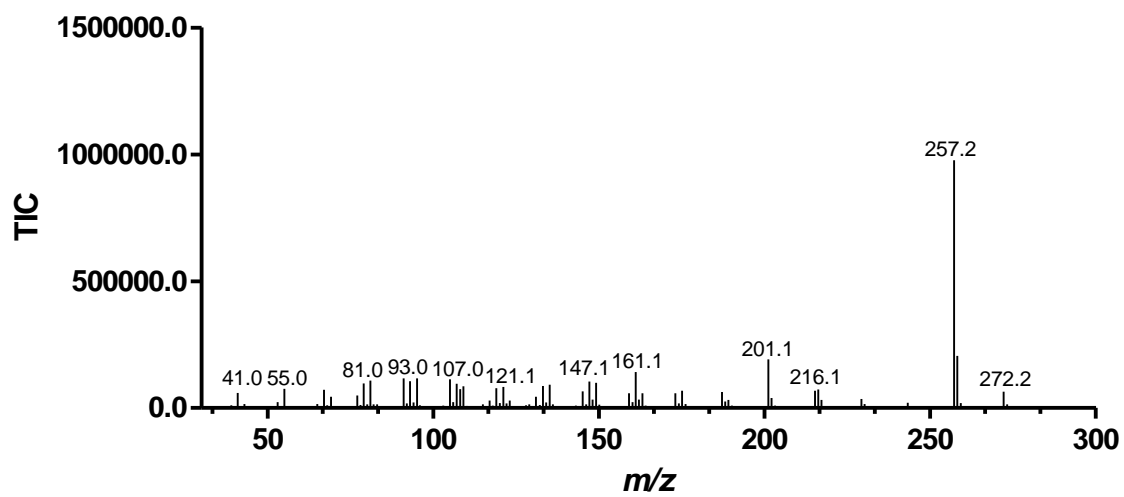

Figure S49 EI mass spectrum of **6'**.

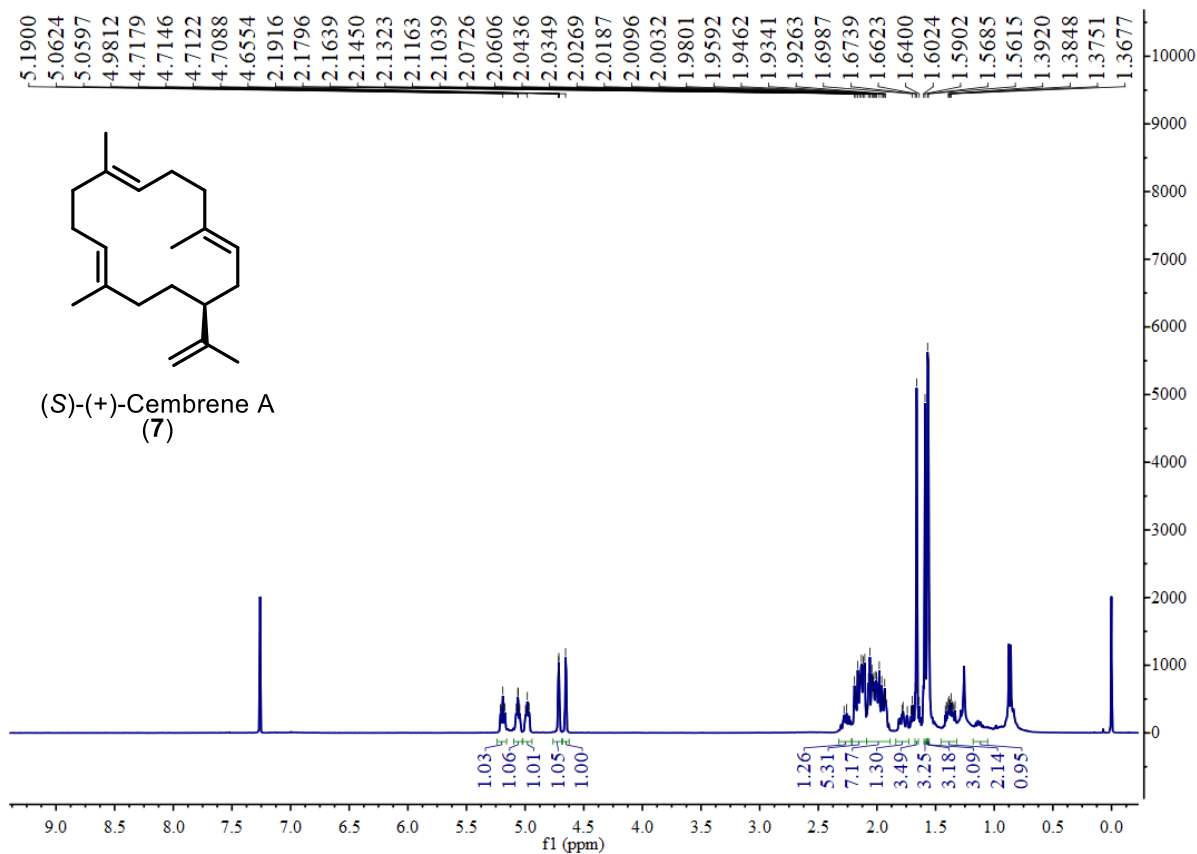

Figure S50 <sup>1</sup>H NMR spectrum of 7 in CDCl<sub>3</sub> (400 MHz).

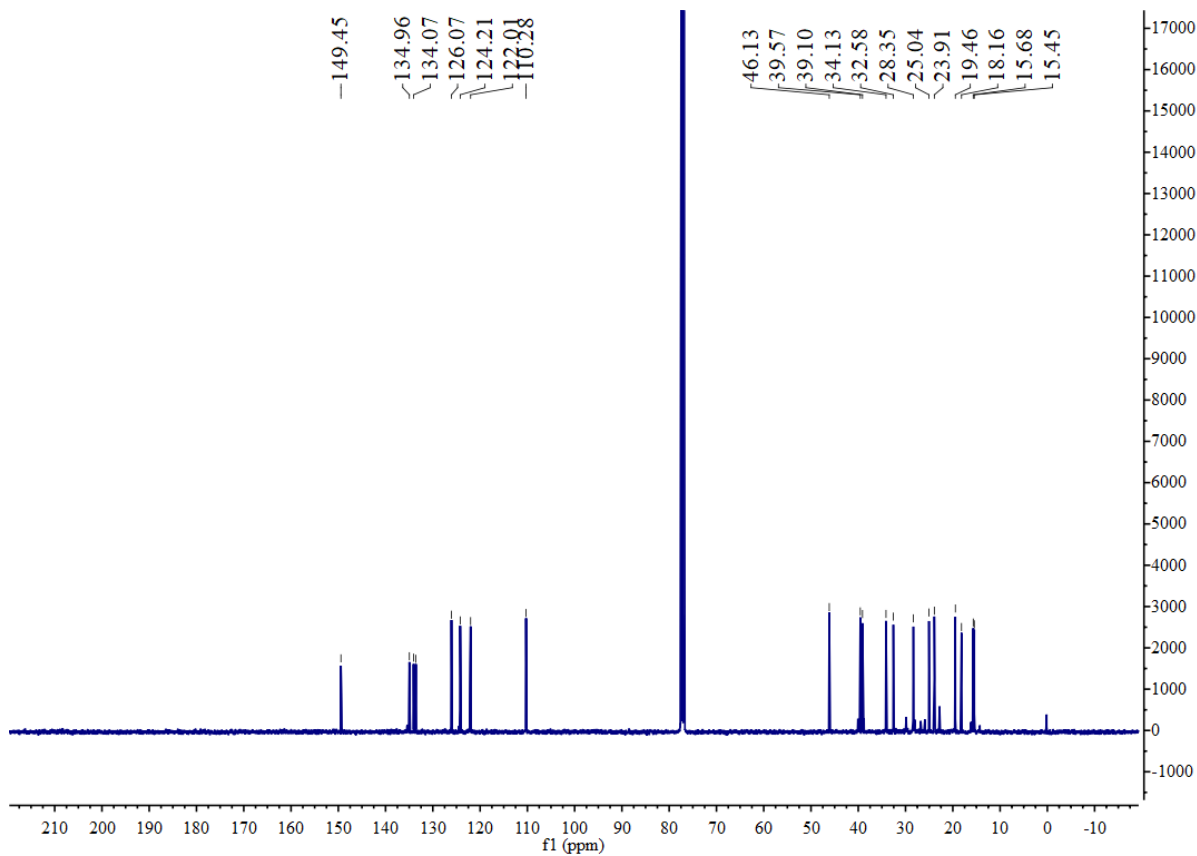

Figure S51 <sup>13</sup>C NMR spectrum of 7 in CDCl<sub>3</sub> (100 MHz).

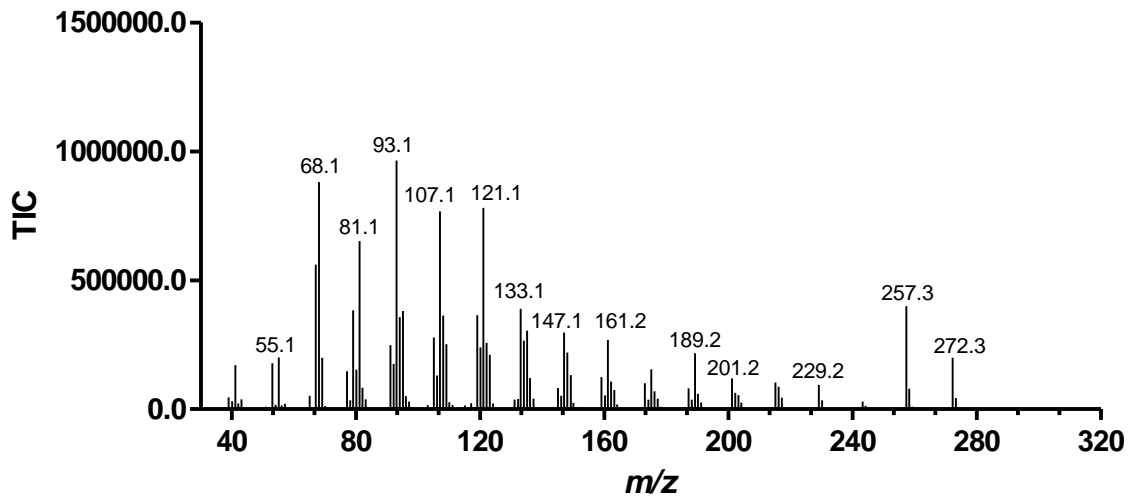

Figure S52 EI mass spectrum of 7.

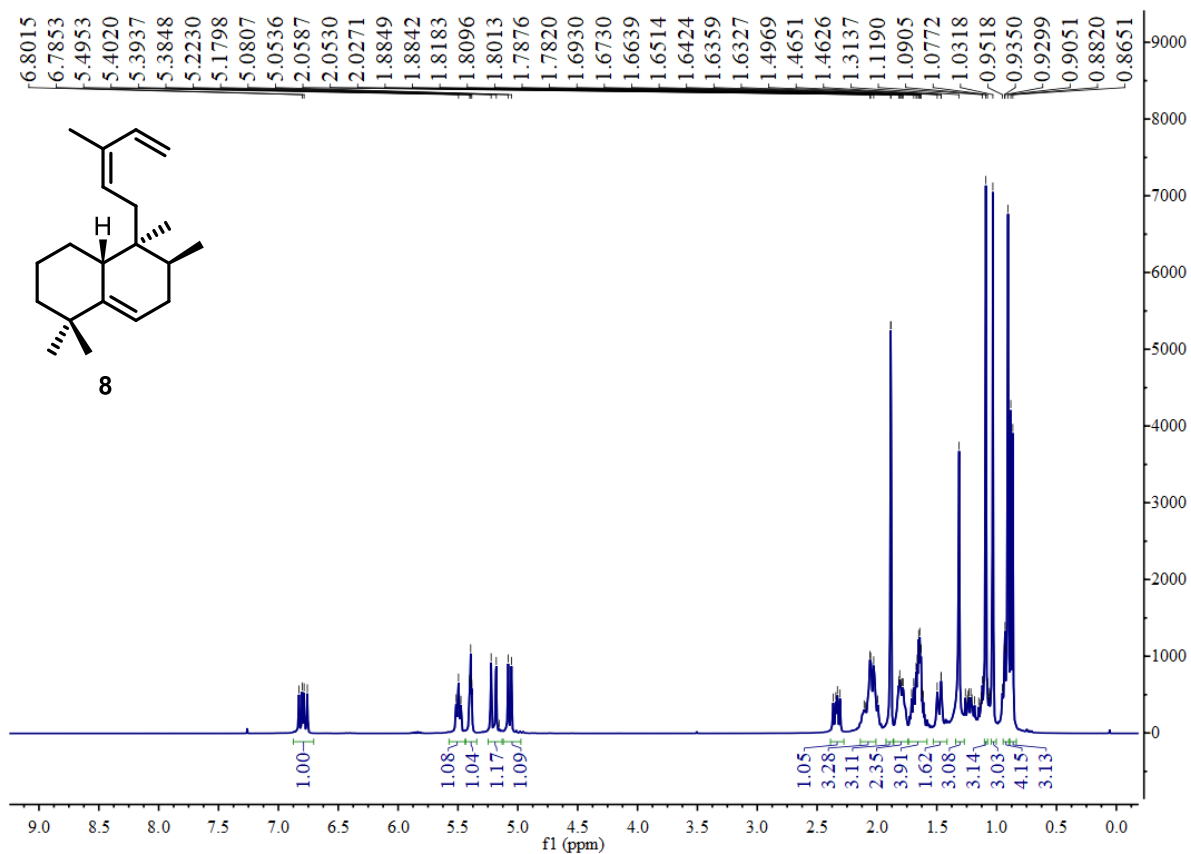

Figure S53 <sup>1</sup>H NMR spectrum of 8 in CDCl<sub>3</sub> (400 MHz).

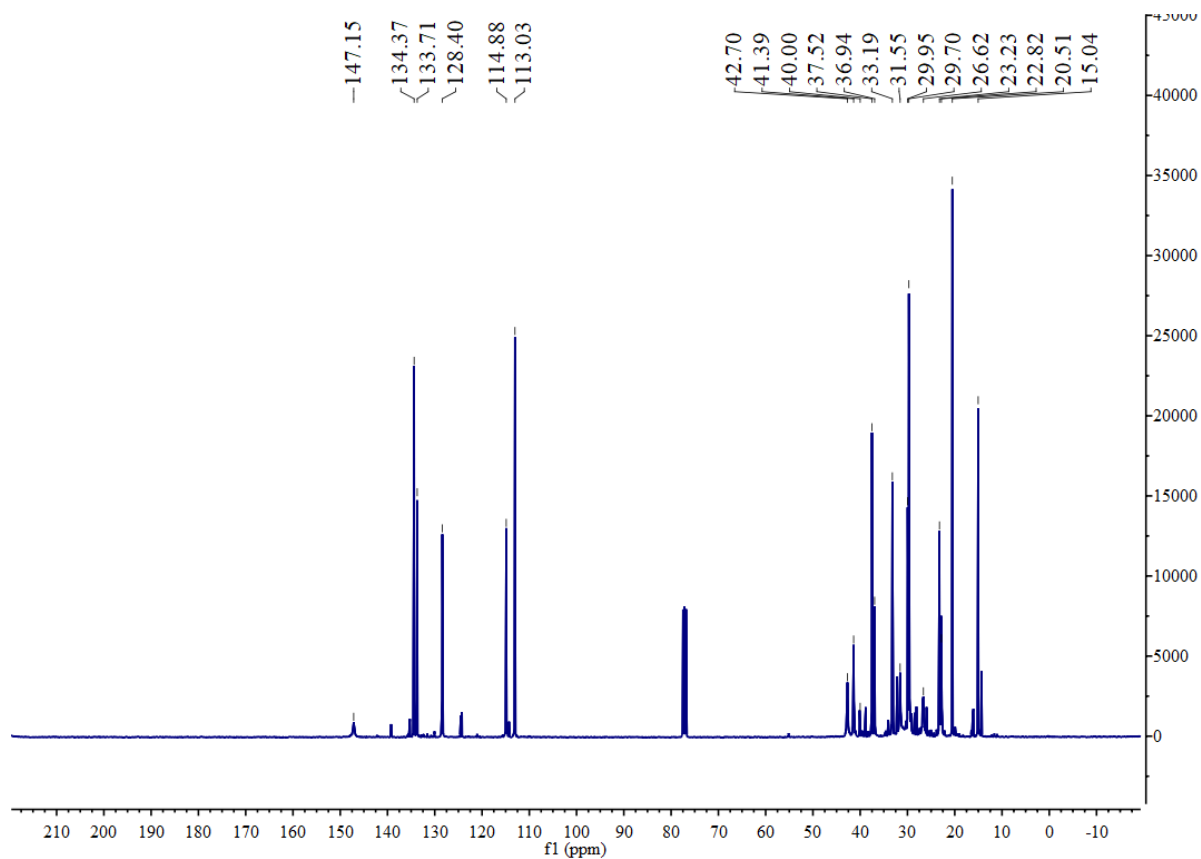

Figure S54 <sup>13</sup>C NMR spectrum of **8** in CDCl<sub>3</sub> (100 MHz).

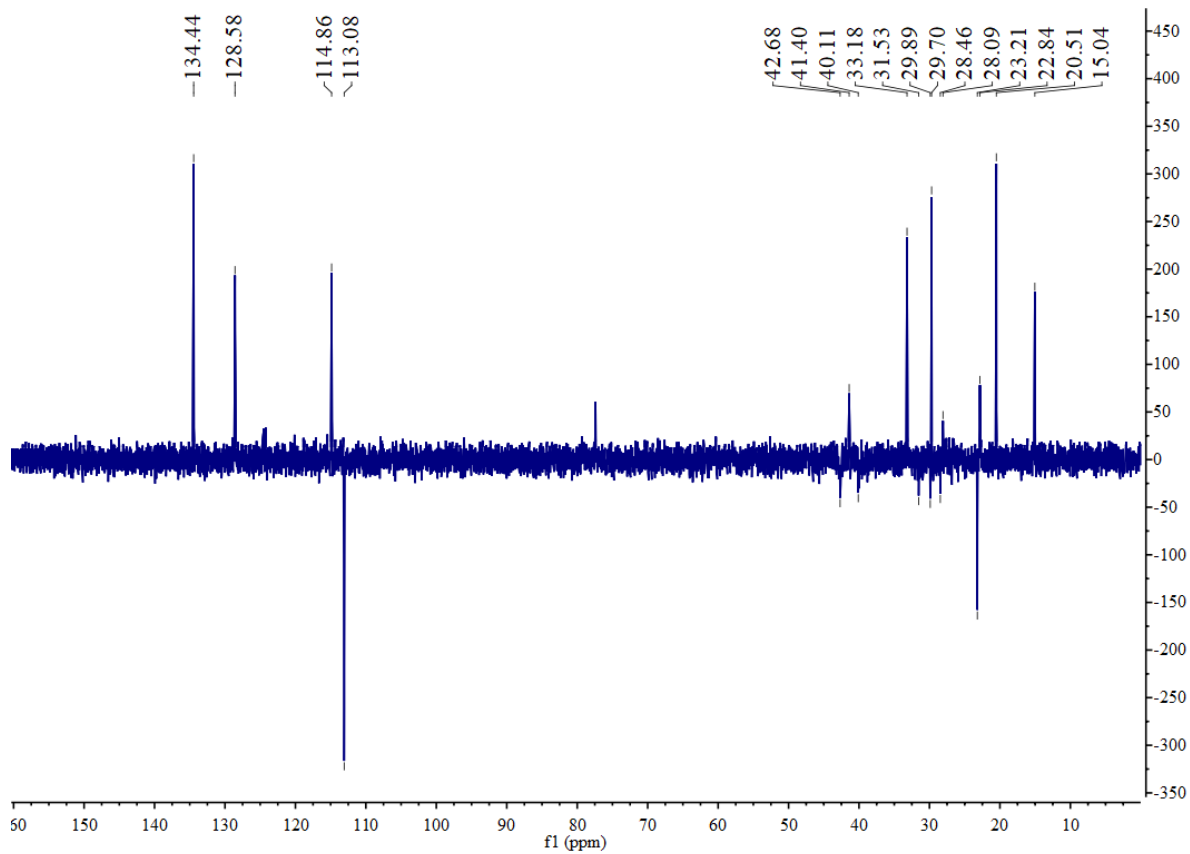

Figure S55 DEPT-135 NMR spectrum of **8** in CDCl<sub>3</sub> (100 MHz).

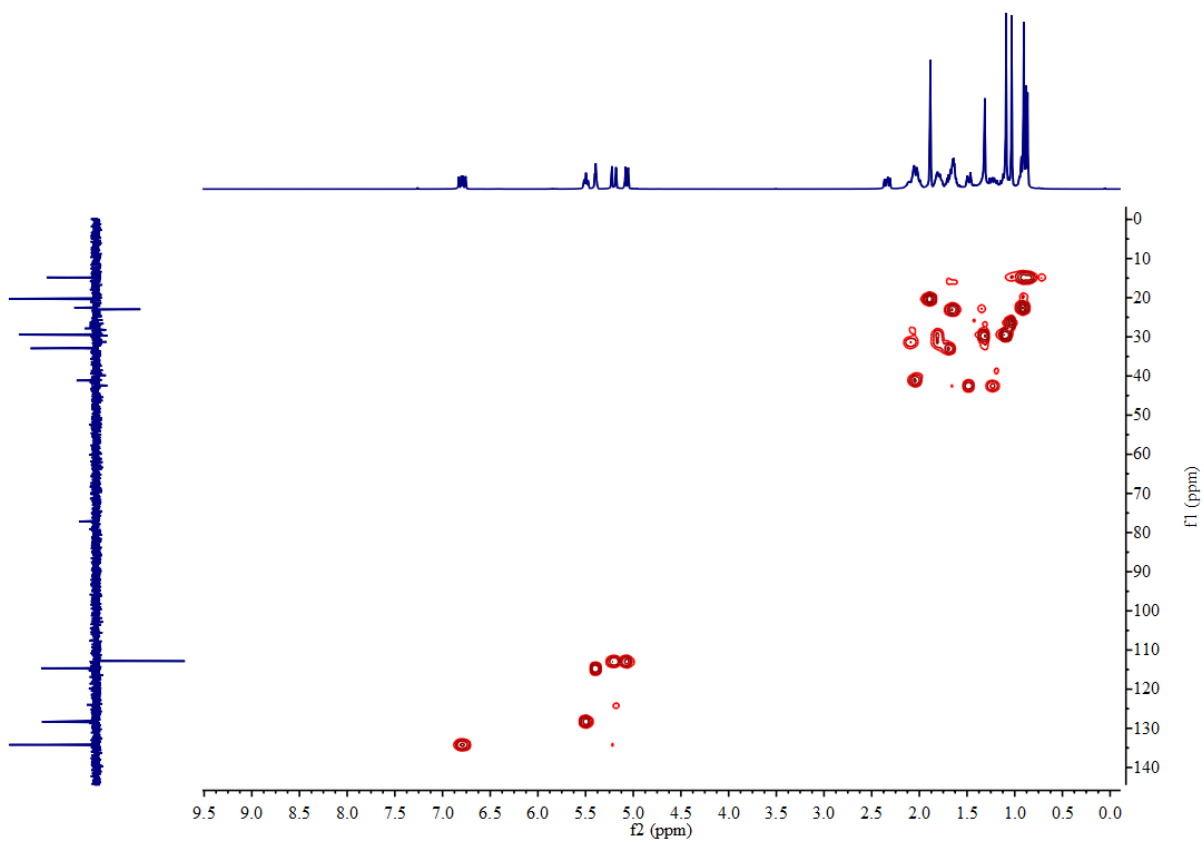

Figure S56 HSQC spectrum of **8** in CDCl<sub>3</sub> (400 MHz).

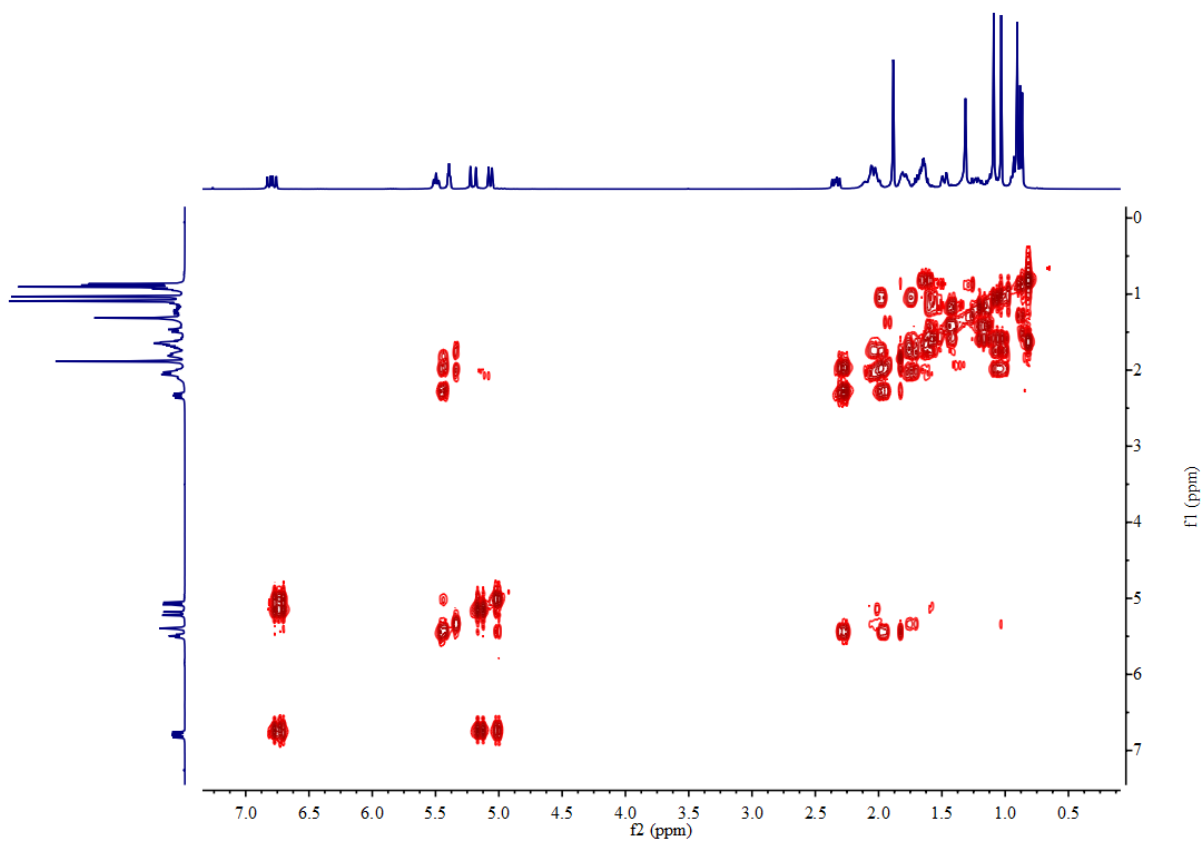

Figure S57 <sup>1</sup>H-<sup>1</sup>H COSY spectrum of **8** in CDCl<sub>3</sub> (400 MHz).

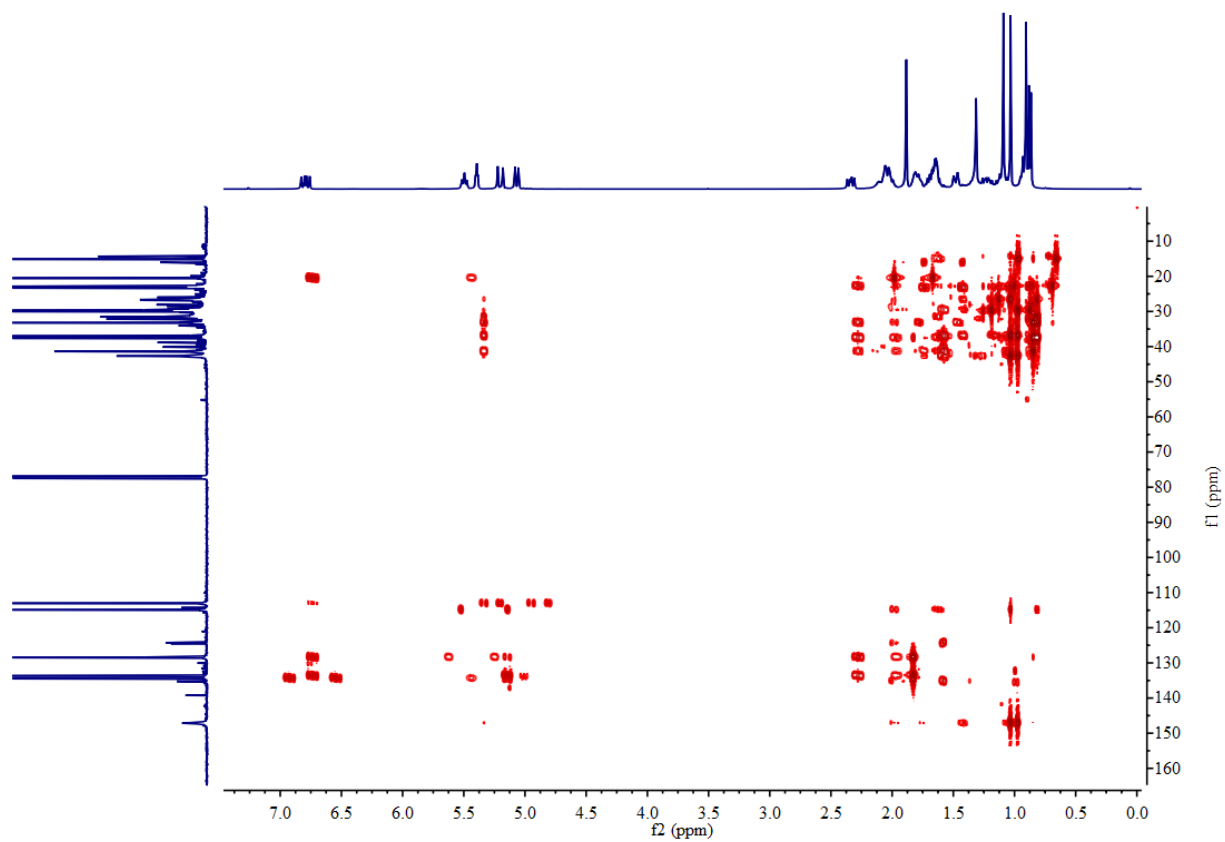

Figure S58 HMBC spectrum of **8** in CDCl<sub>3</sub> (400 MHz).

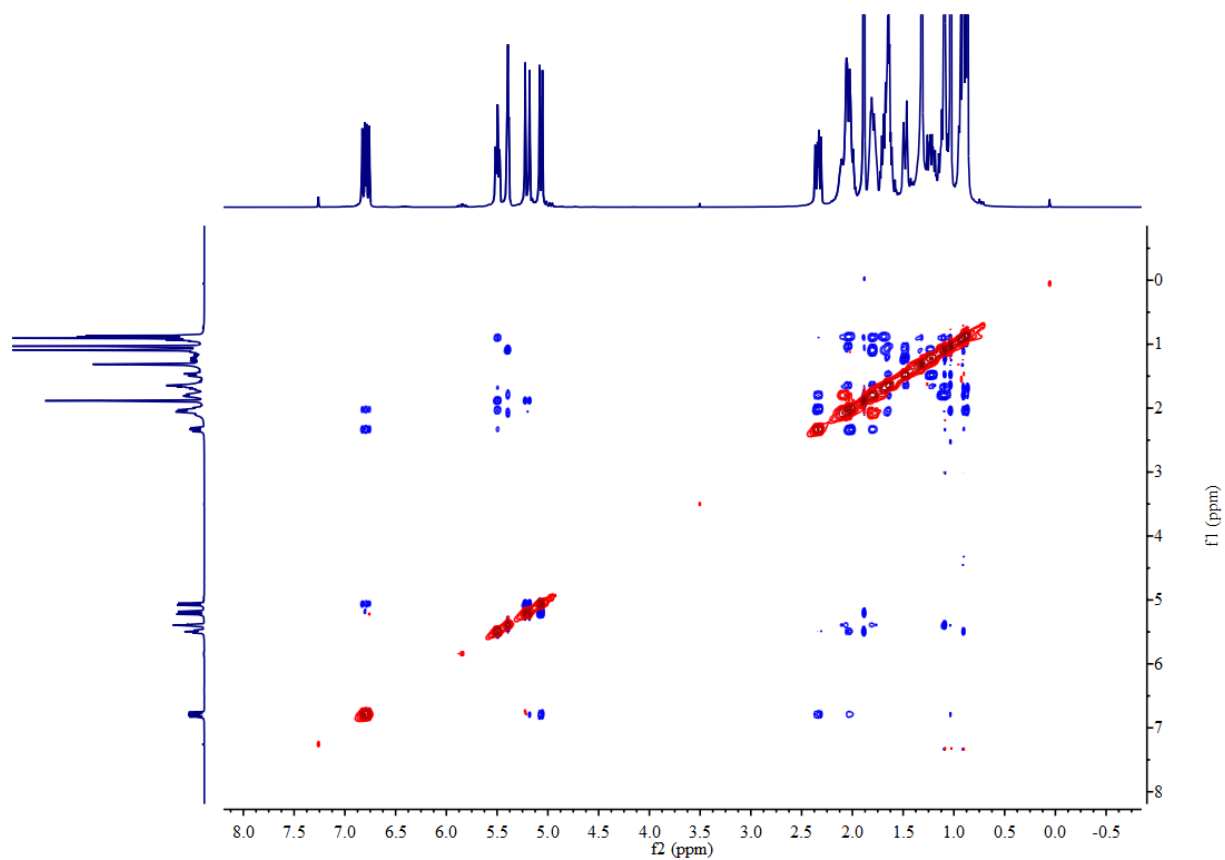

Figure S59 NOESY spectrum of **8** in CDCl<sub>3</sub> (400 MHz).

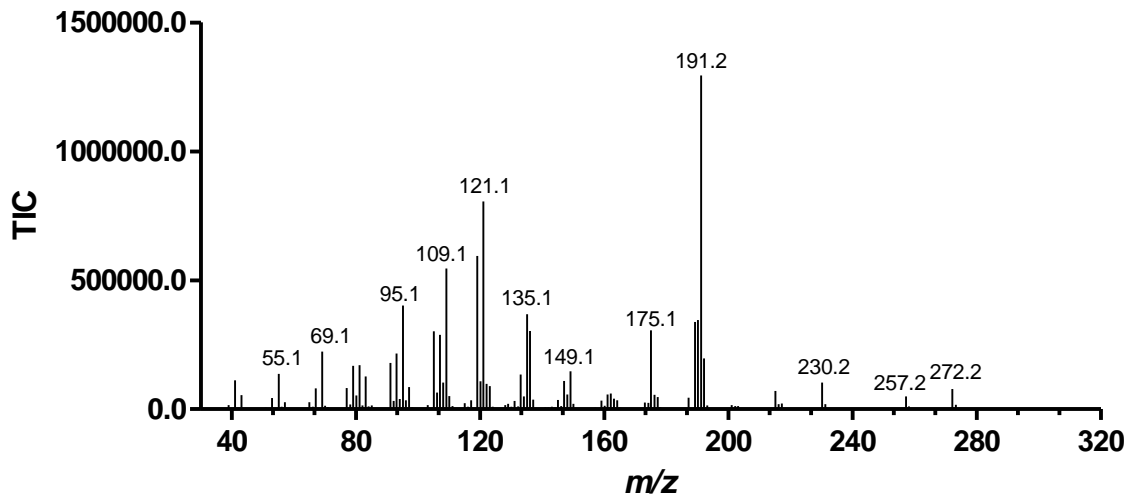

Figure S60 EI mass spectrum of 8.

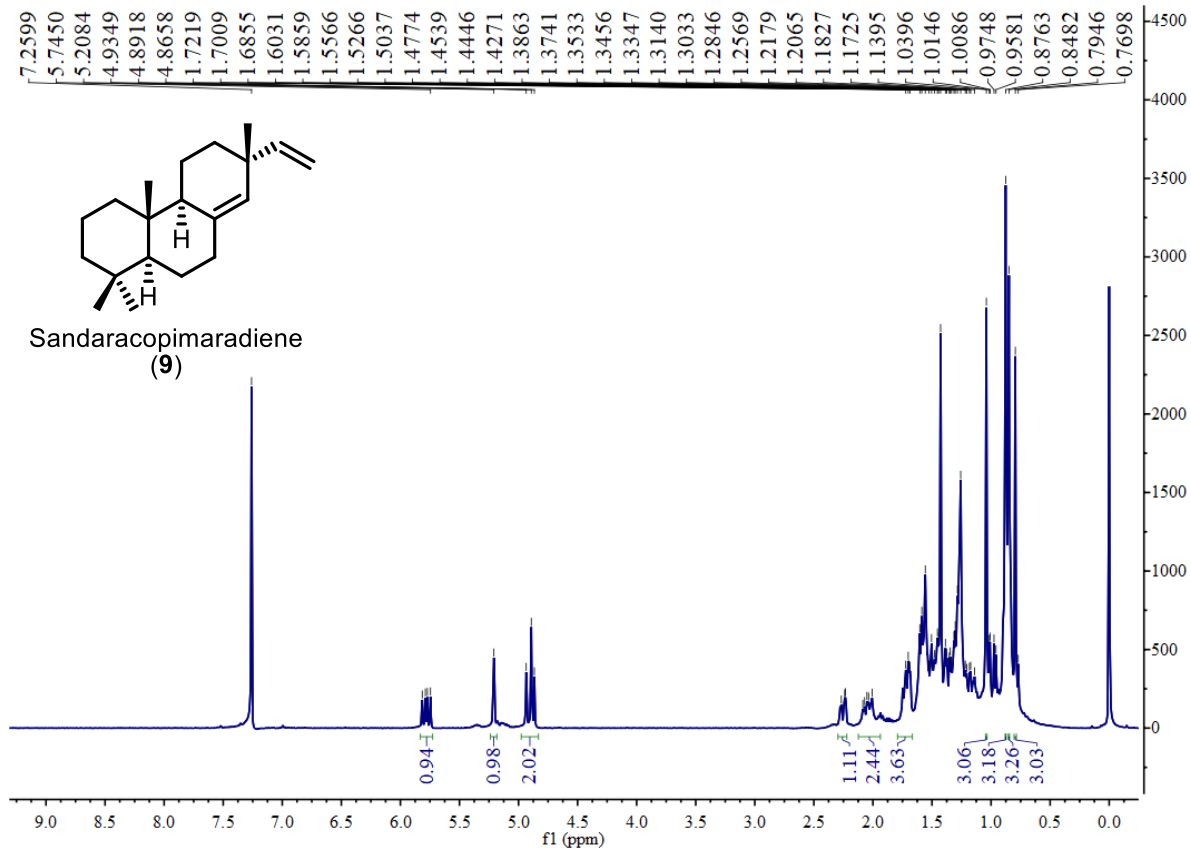

Figure S61 <sup>1</sup>H NMR spectrum of 9 in CDCl<sub>3</sub> (400 MHz).

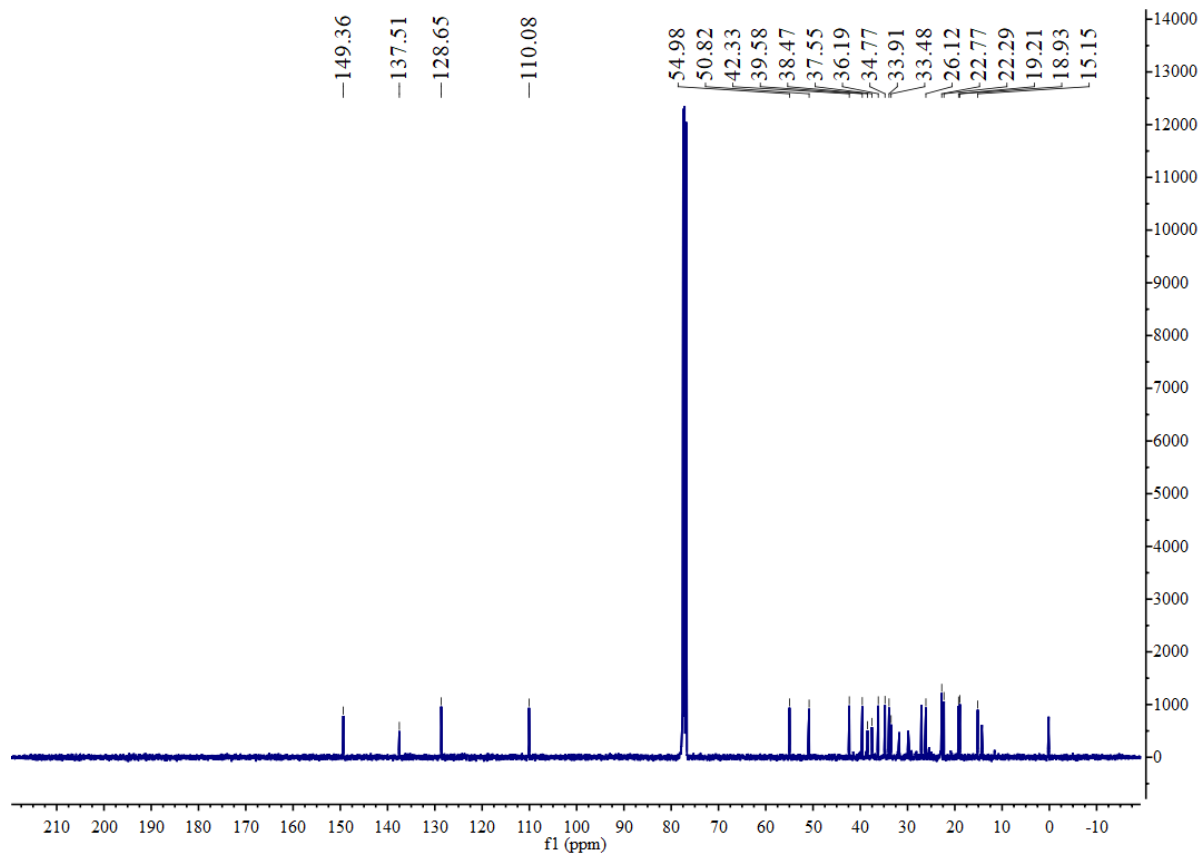

Figure S62  $^{13}\text{C}$  NMR spectrum of **9** in  $\text{CDCl}_3$  (100 MHz).

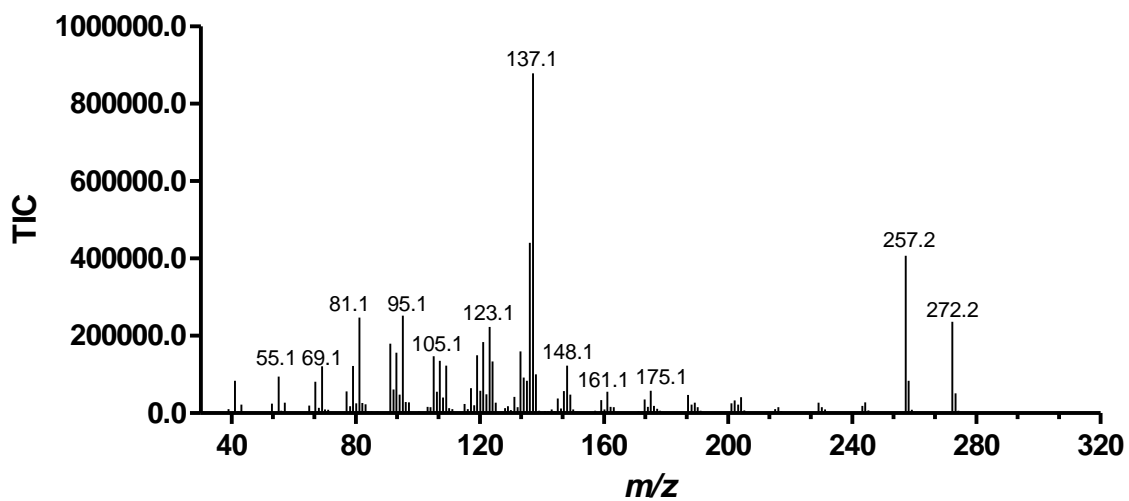

Figure S63 EI mass spectrum of **9**.



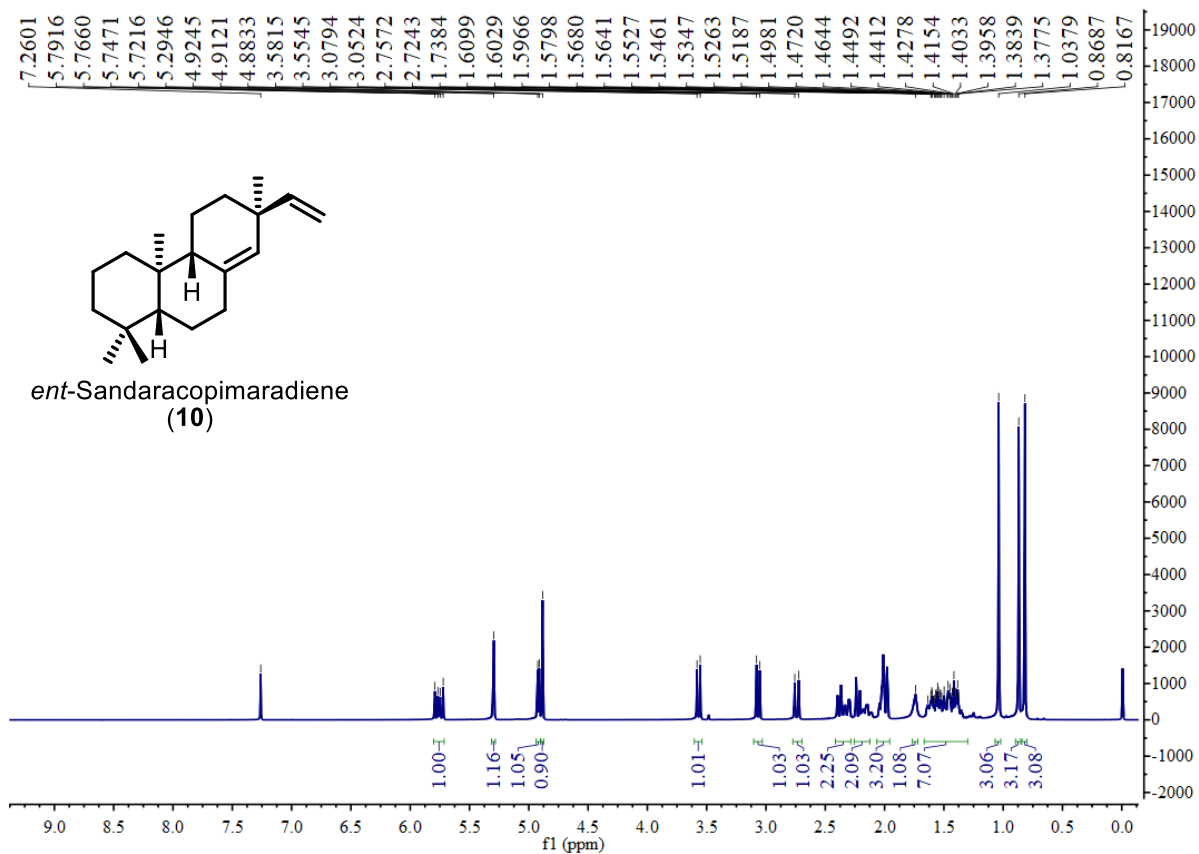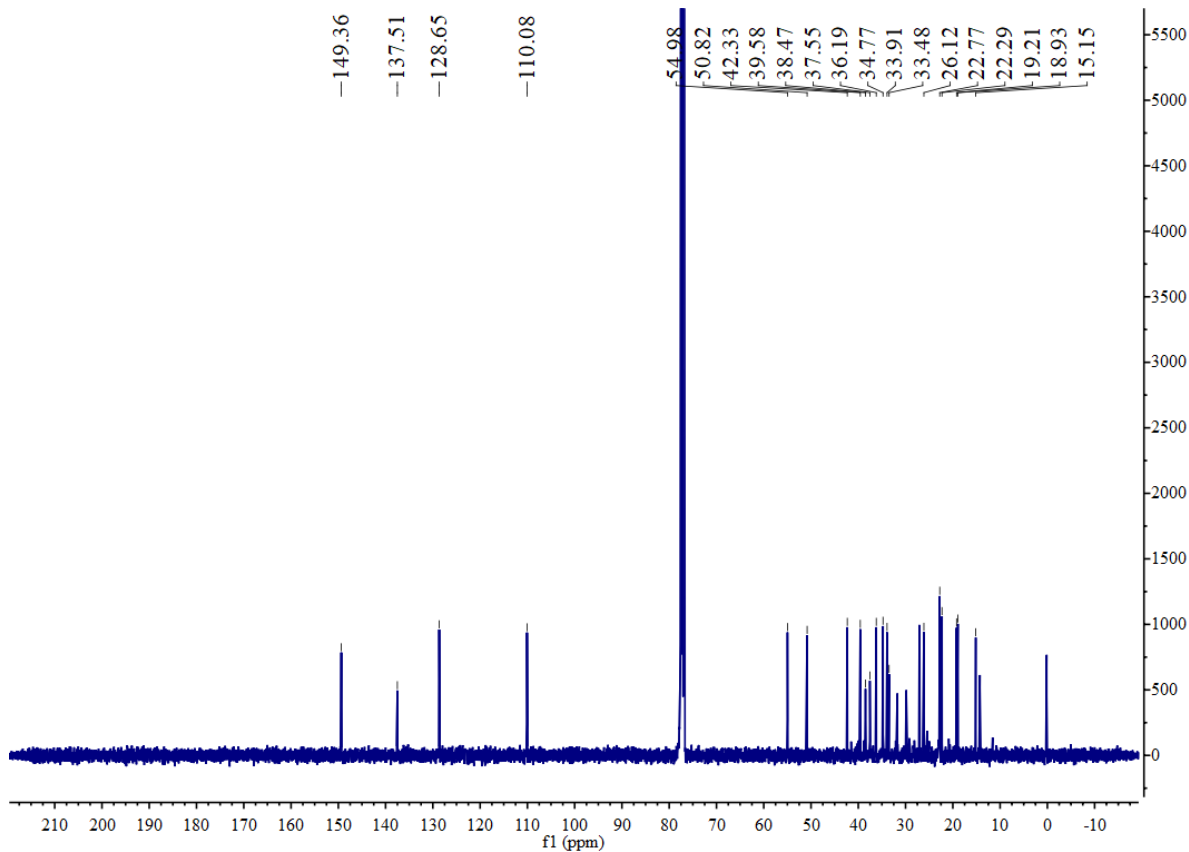

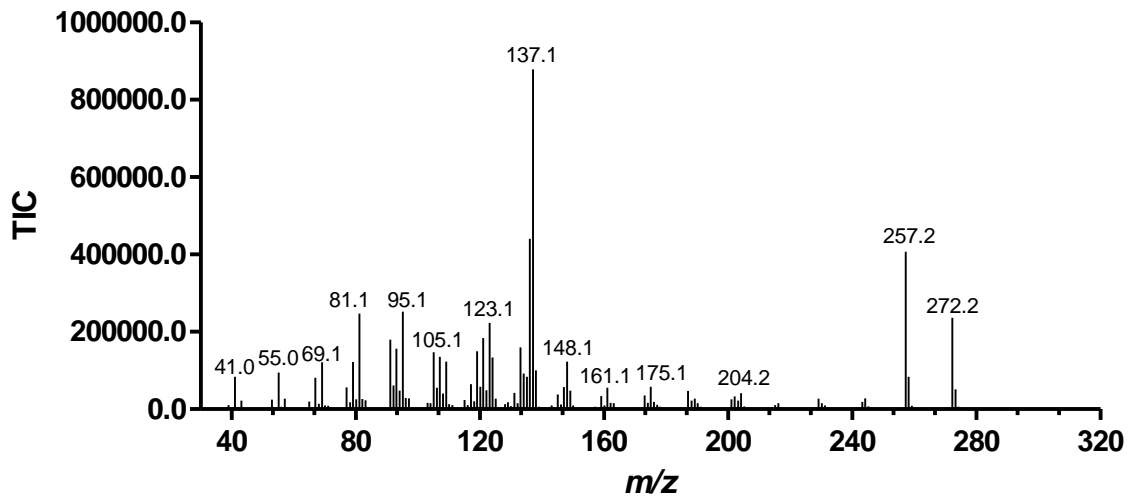

Figure S66 EI mass spectrum of 10.

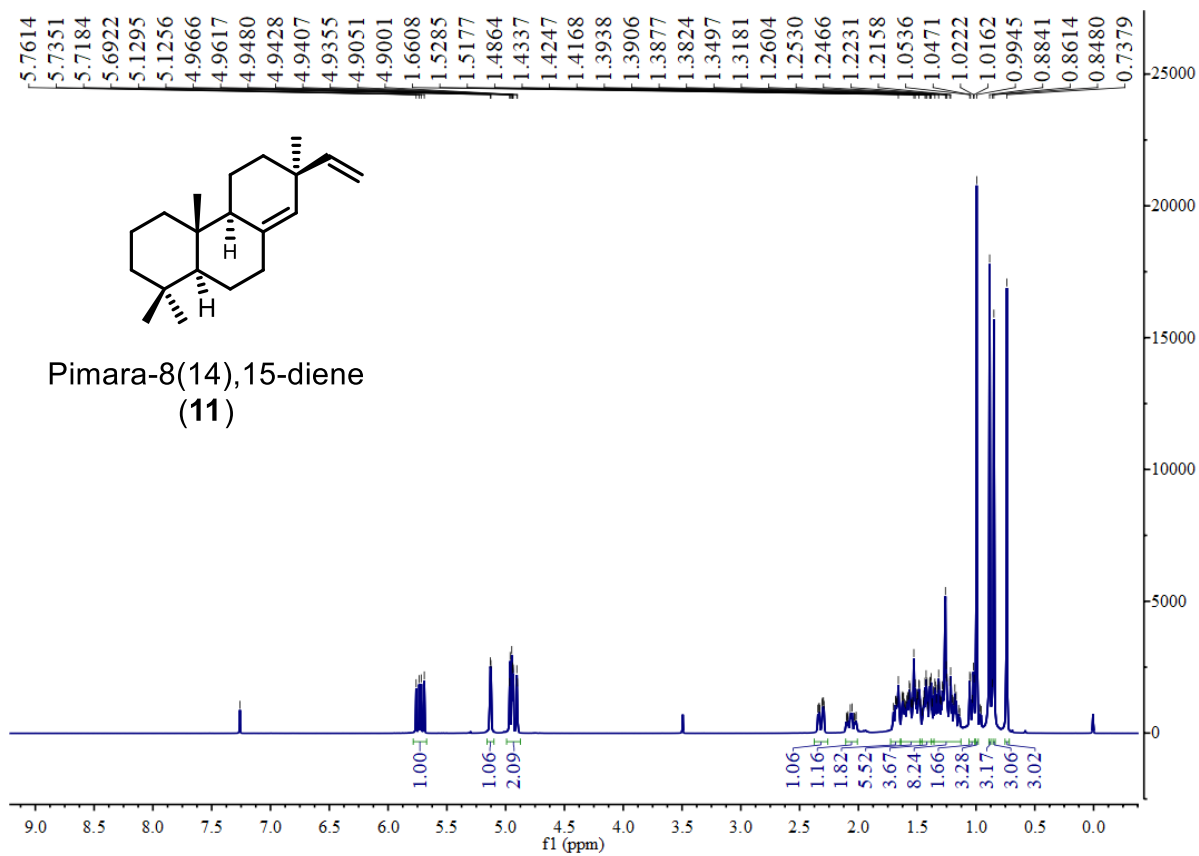

Figure S67  $^1\text{H}$  NMR spectrum of 11 in  $\text{CDCl}_3$  (400 MHz).

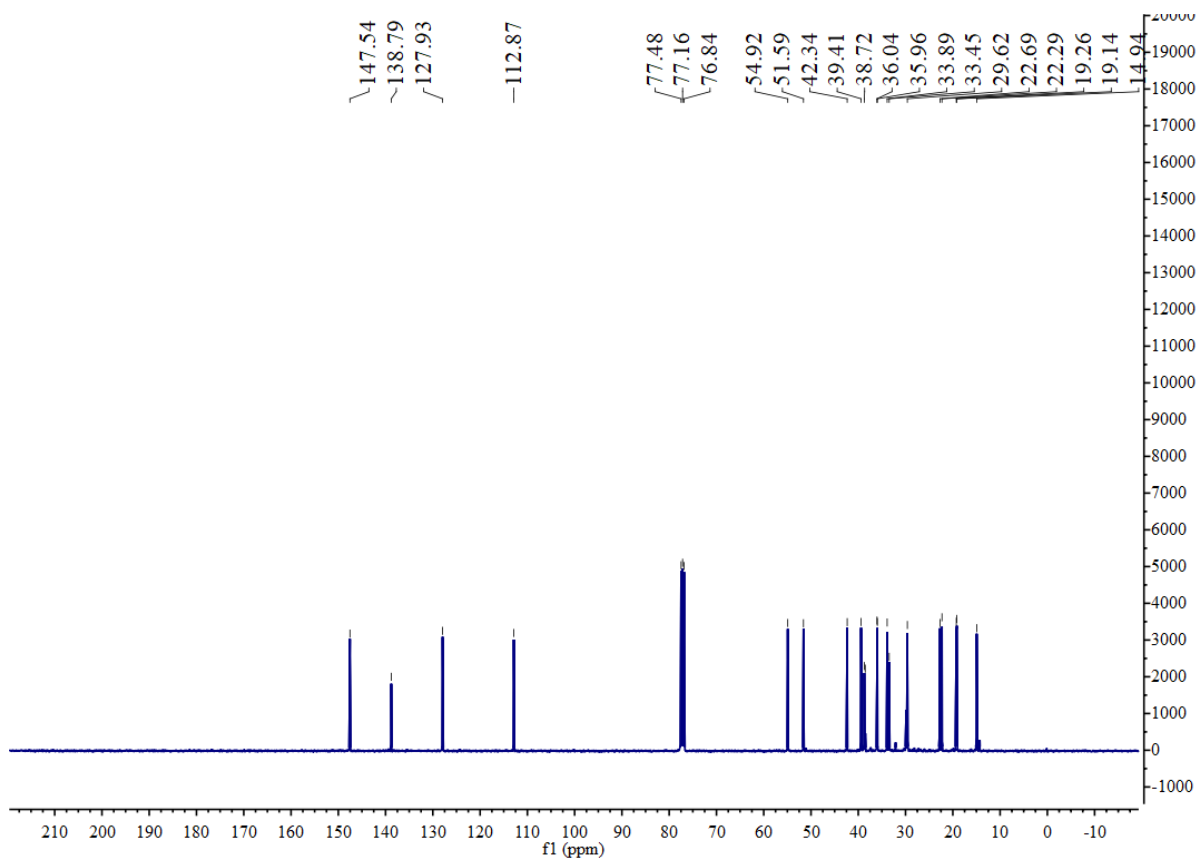

Figure S68  $^{13}\text{C}$  NMR spectrum of **11** in  $\text{CDCl}_3$  (100 MHz).

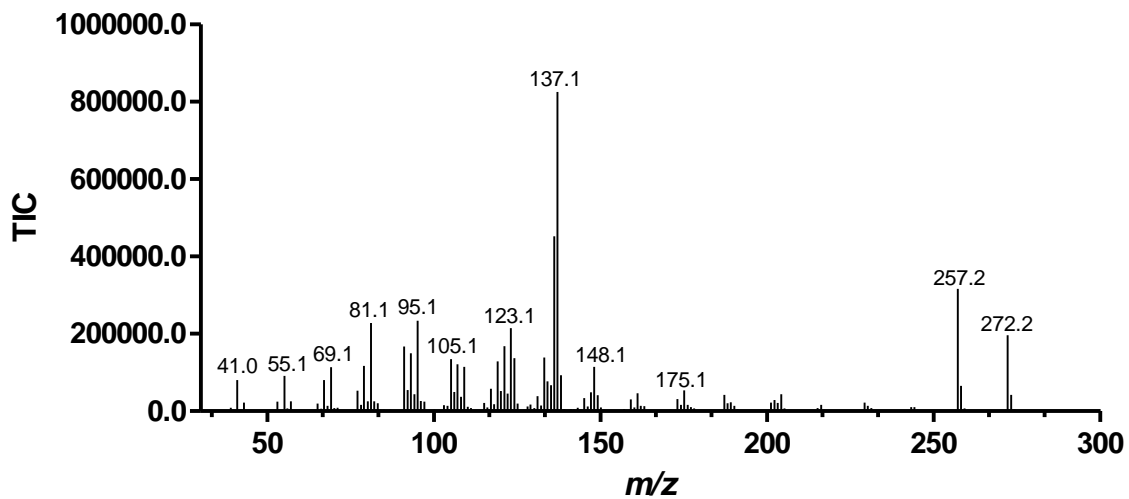

Figure S69 EI mass spectrum of **11**.

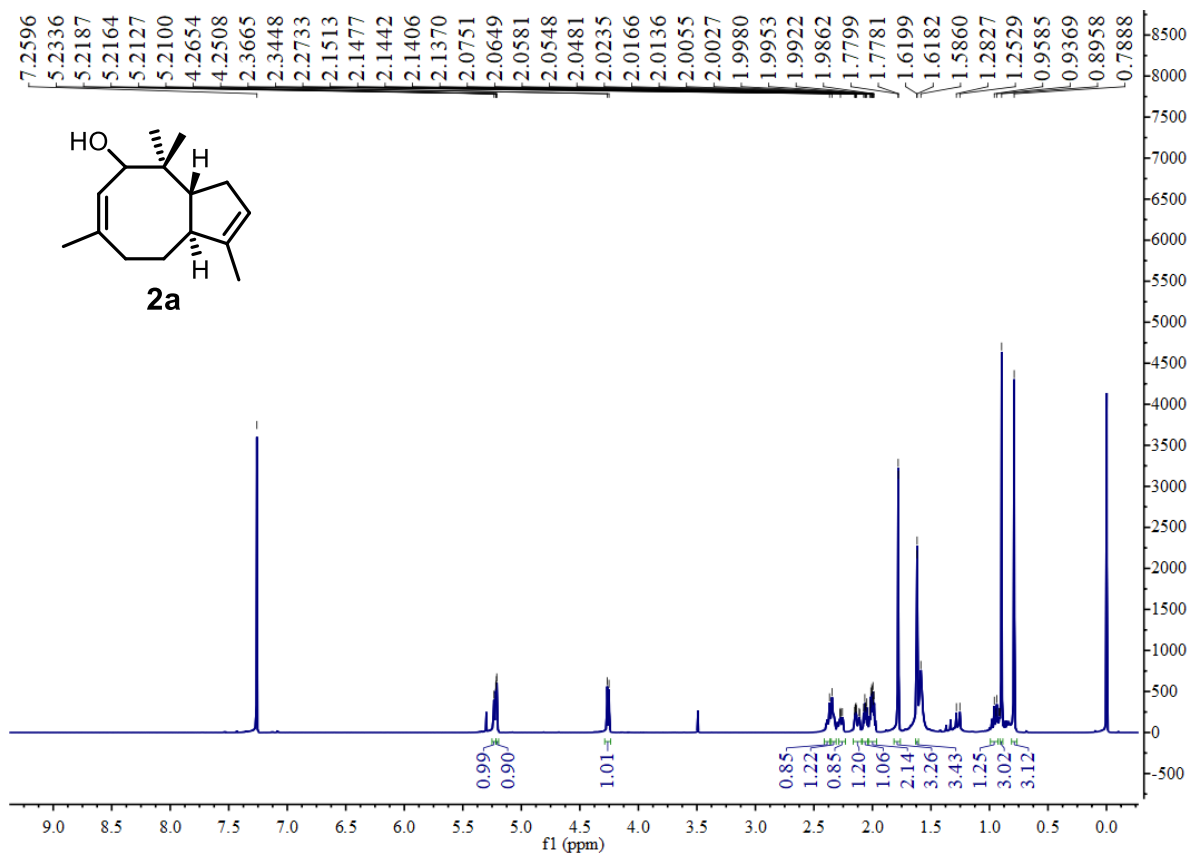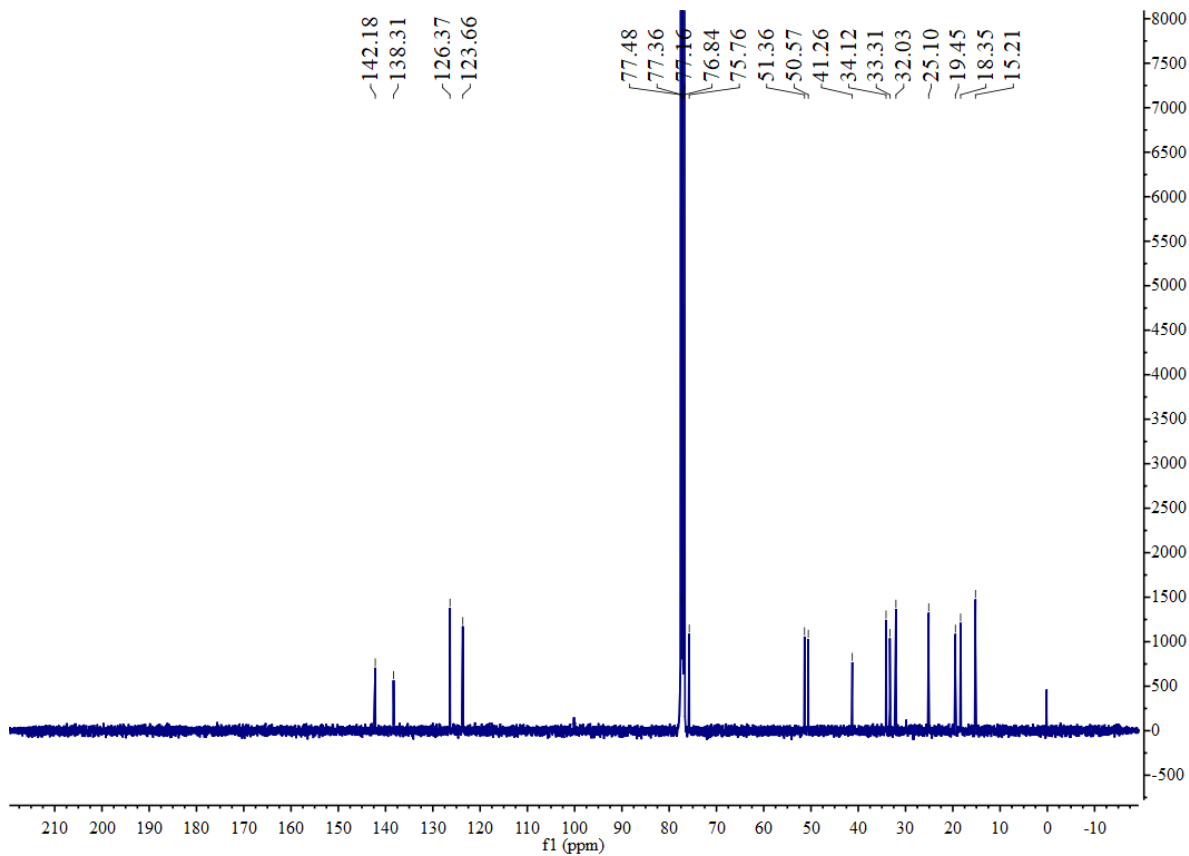

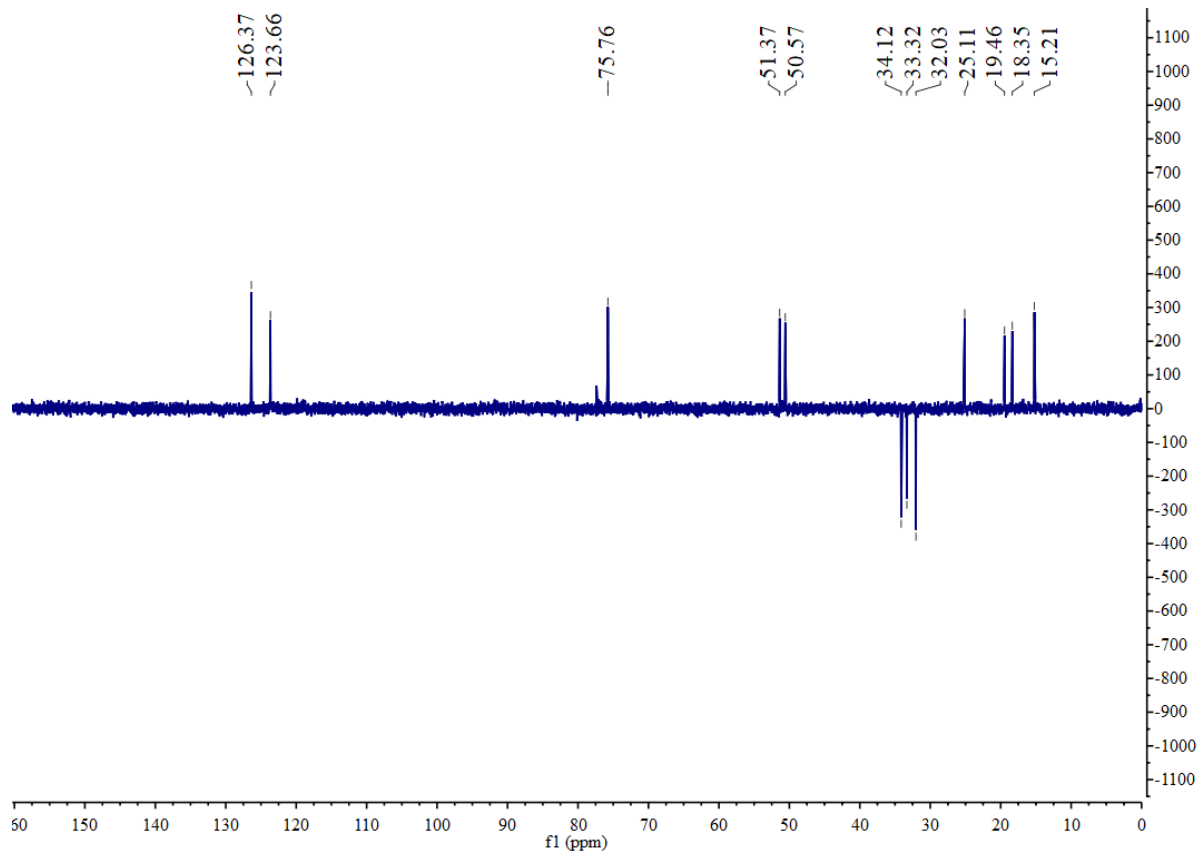

Figure S72 DEPT-135 NMR spectrum of **2a** in  $\text{CDCl}_3$  (100 MHz).

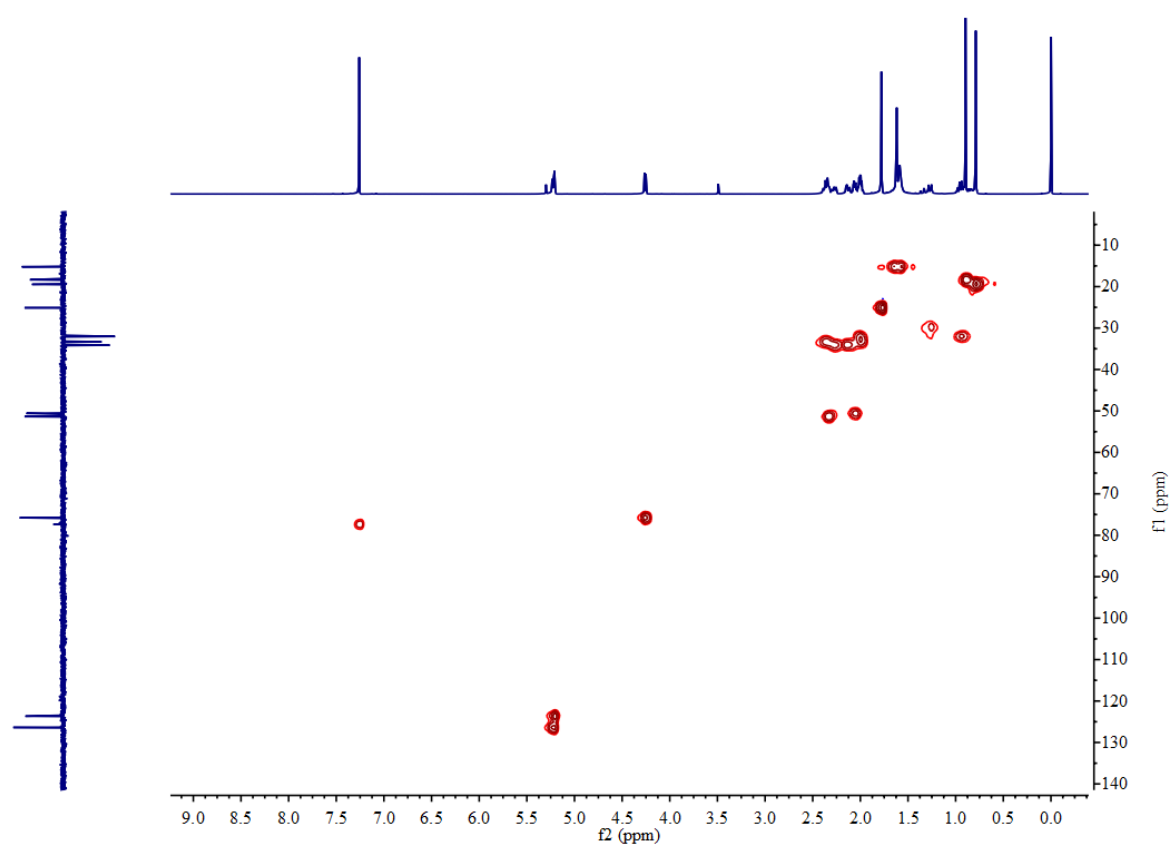

Figure S73 HSQC spectrum of **2a** in  $\text{CDCl}_3$  (400 MHz).

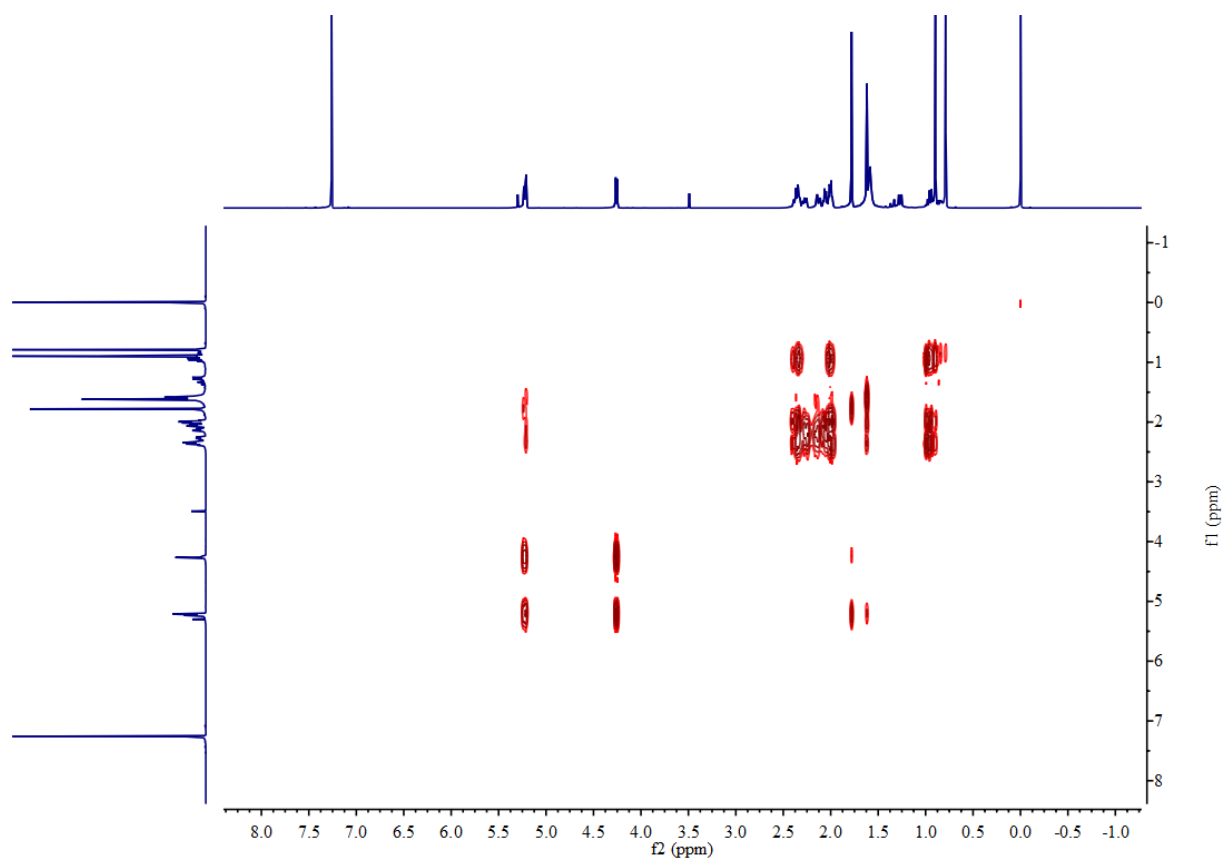

Figure S74  $^1\text{H}$ - $^1\text{H}$  COSY spectrum of **2a** in  $\text{CDCl}_3$  (400 MHz).

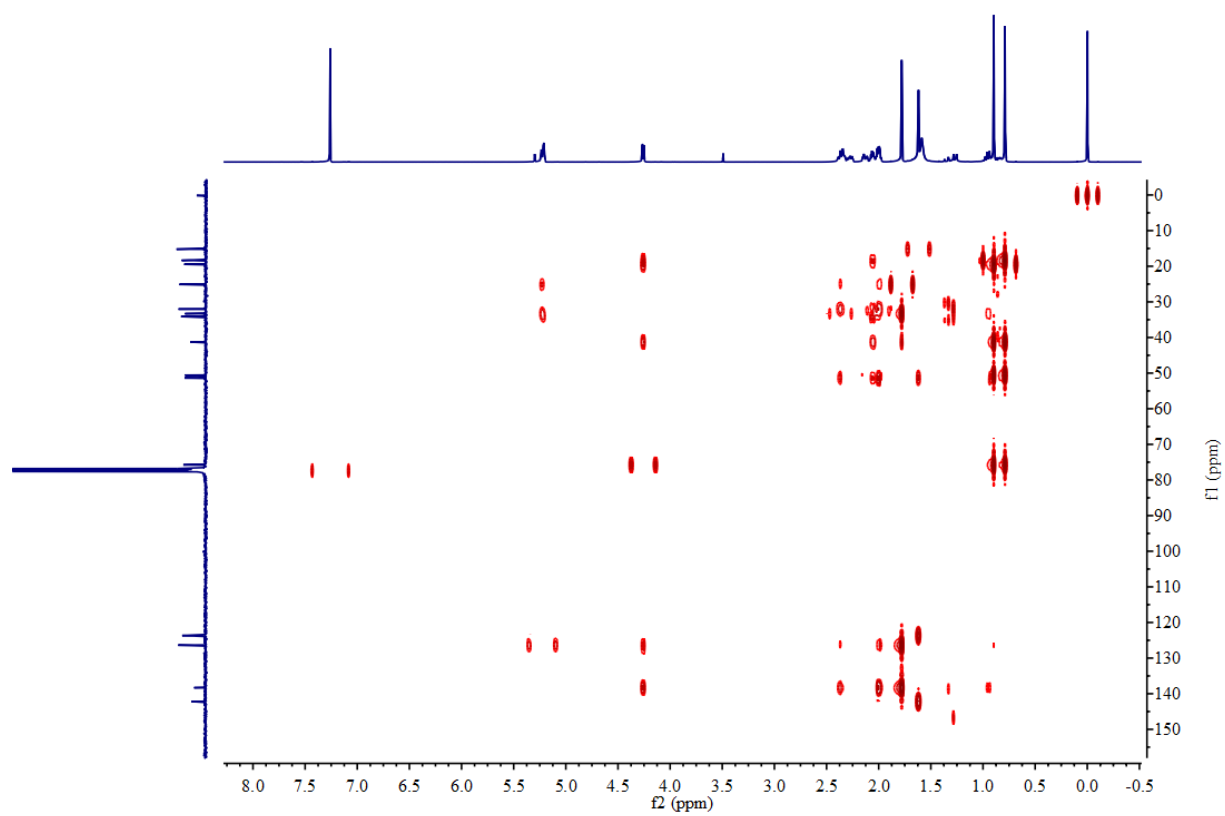

Figure S75 HMBC spectrum of **2a** in  $\text{CDCl}_3$  (400 MHz).

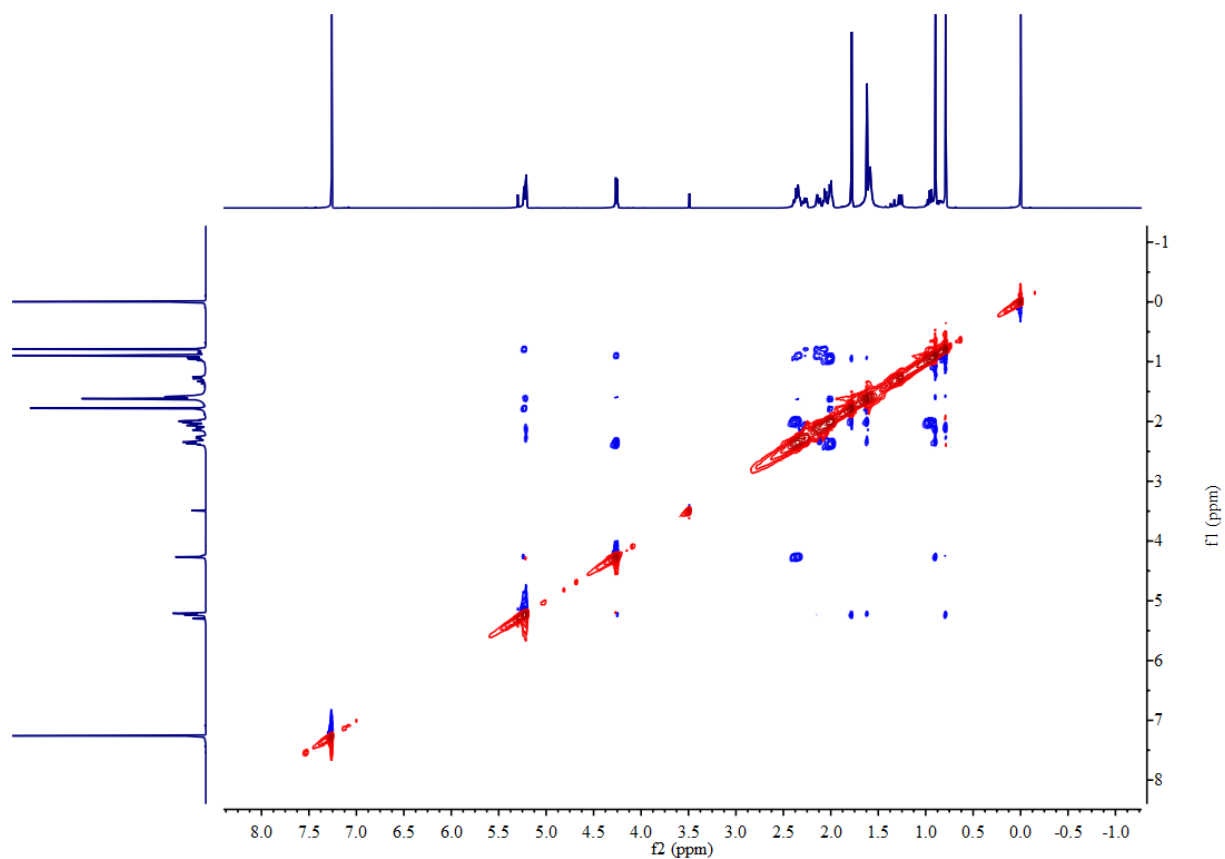

Figure S76 NOESY spectrum of **2a** in CDCl<sub>3</sub> (400 MHz).

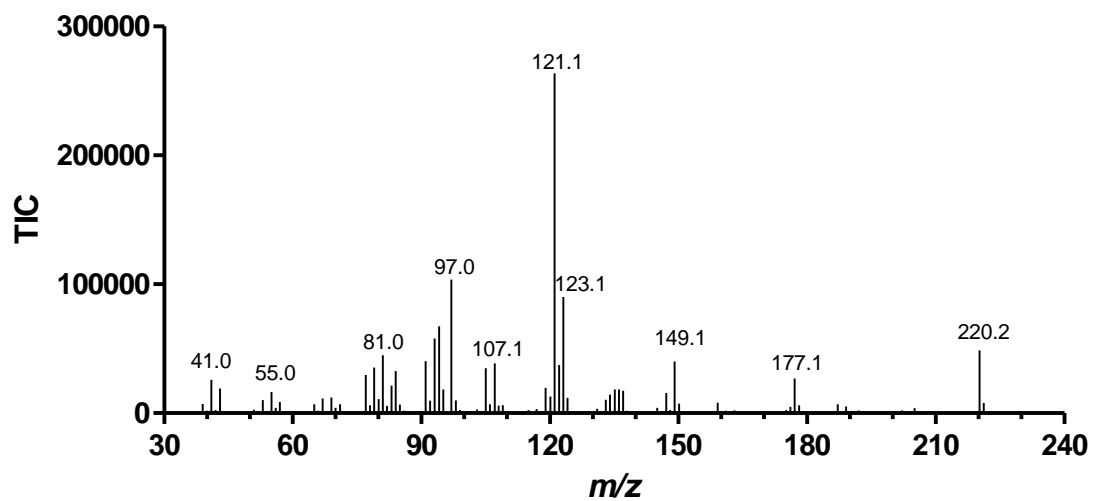

Figure S77 EI mass spectrum of **2a**.

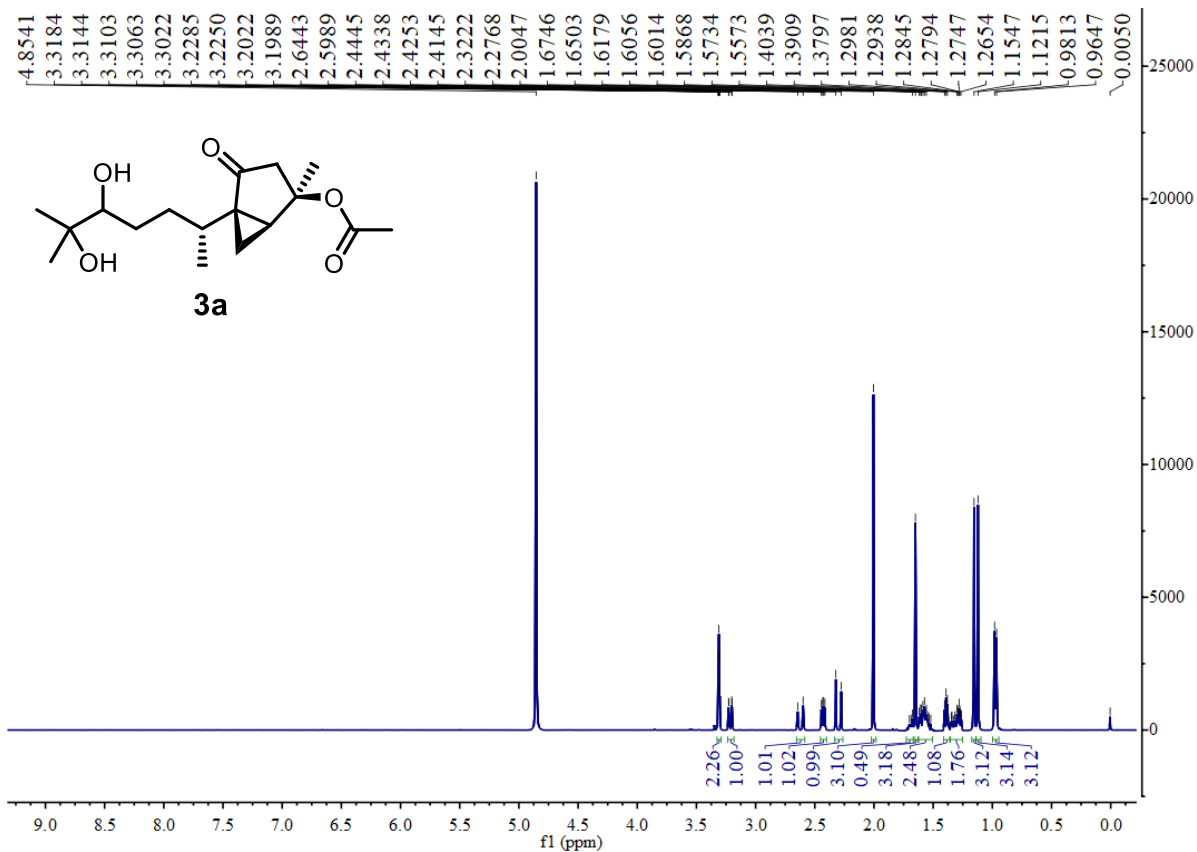

**Figure S78** <sup>1</sup>H NMR spectrum of **3a** in methanol-*d*<sub>4</sub> (400 MHz).

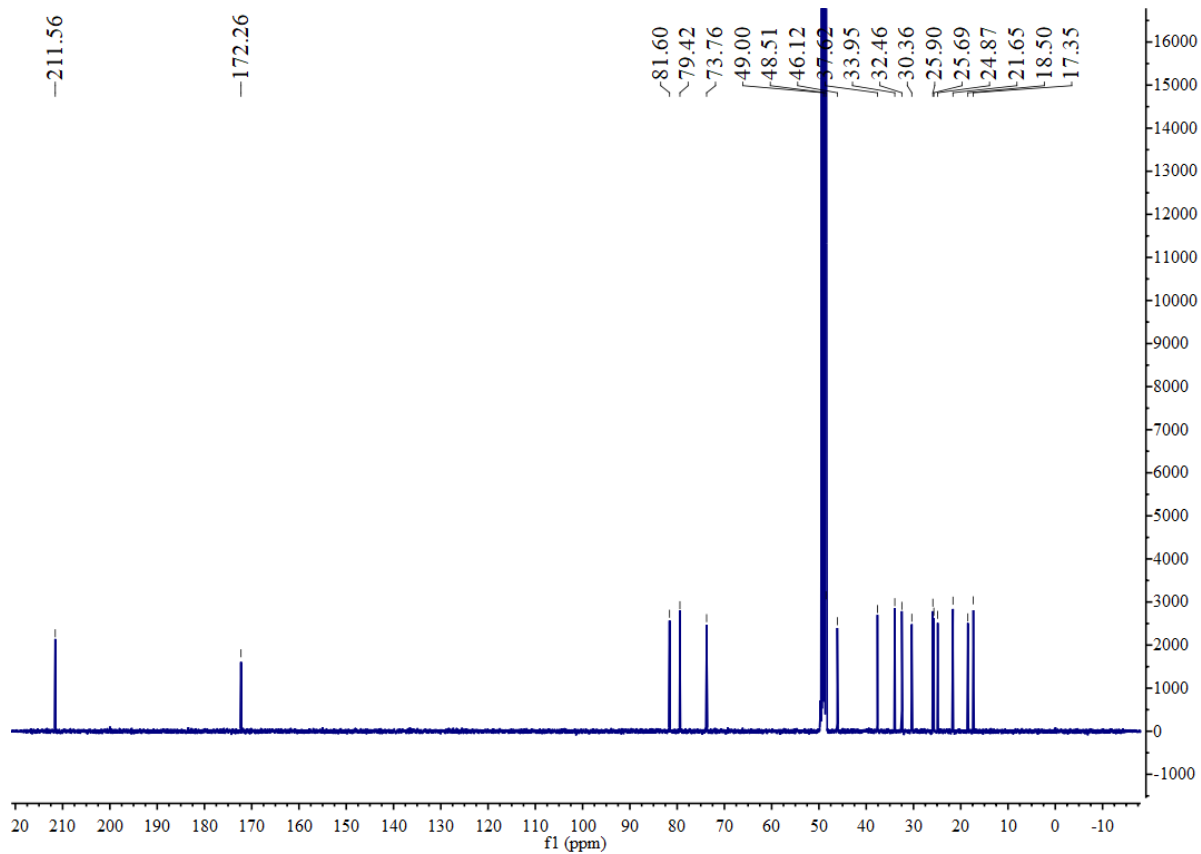

**Figure S79** <sup>13</sup>C NMR spectrum of **3a** in methanol-*d*<sub>4</sub> (100 MHz).



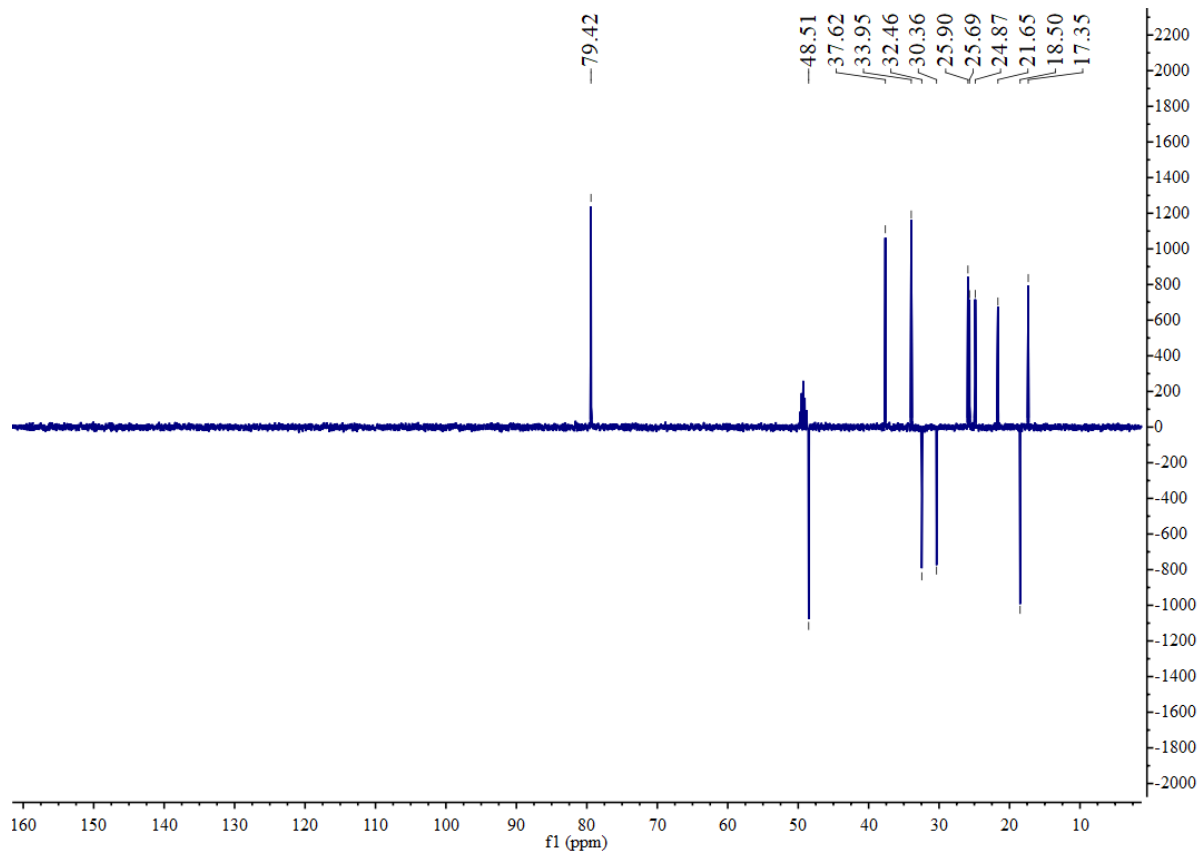

Figure S80 DEPT-135 NMR spectrum of **3a** in methanol- $d_4$  (100 MHz).

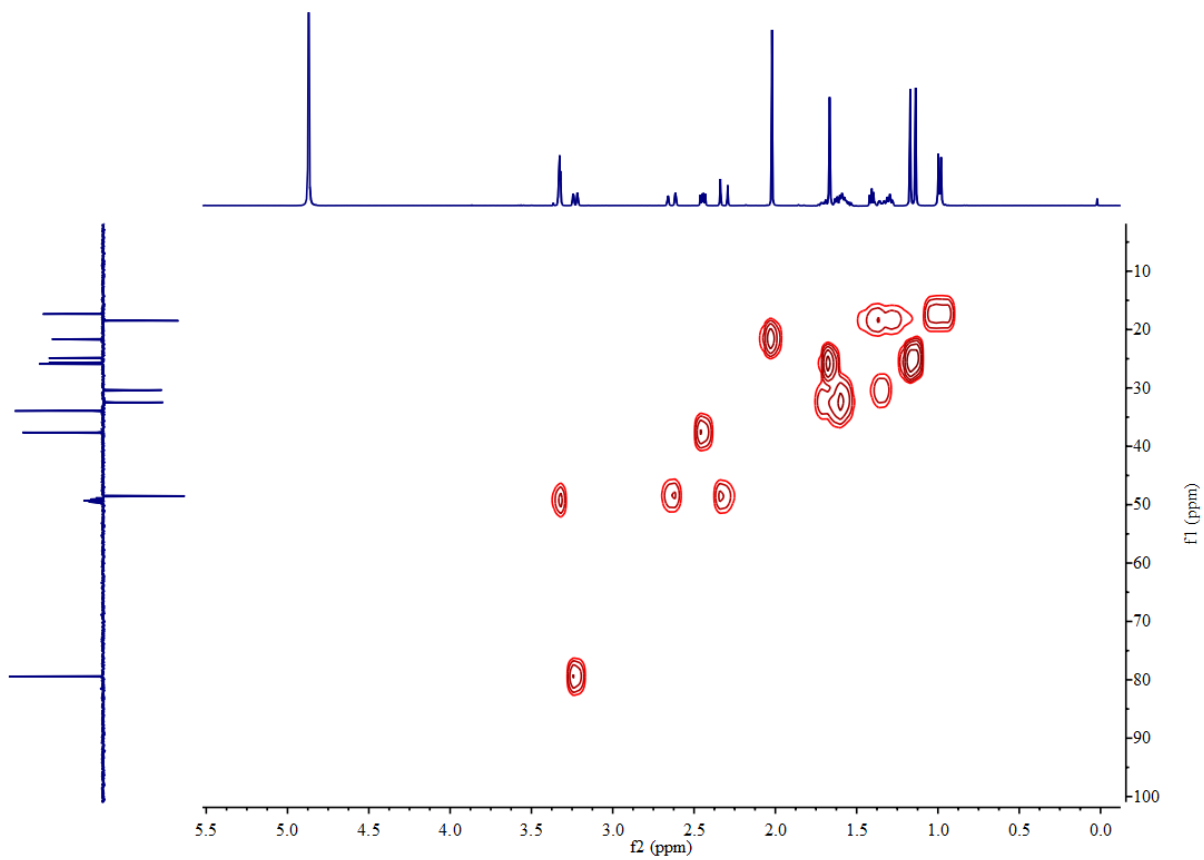

Figure S81 HSQC spectrum of **3a** in methanol- $d_4$  (400 MHz).

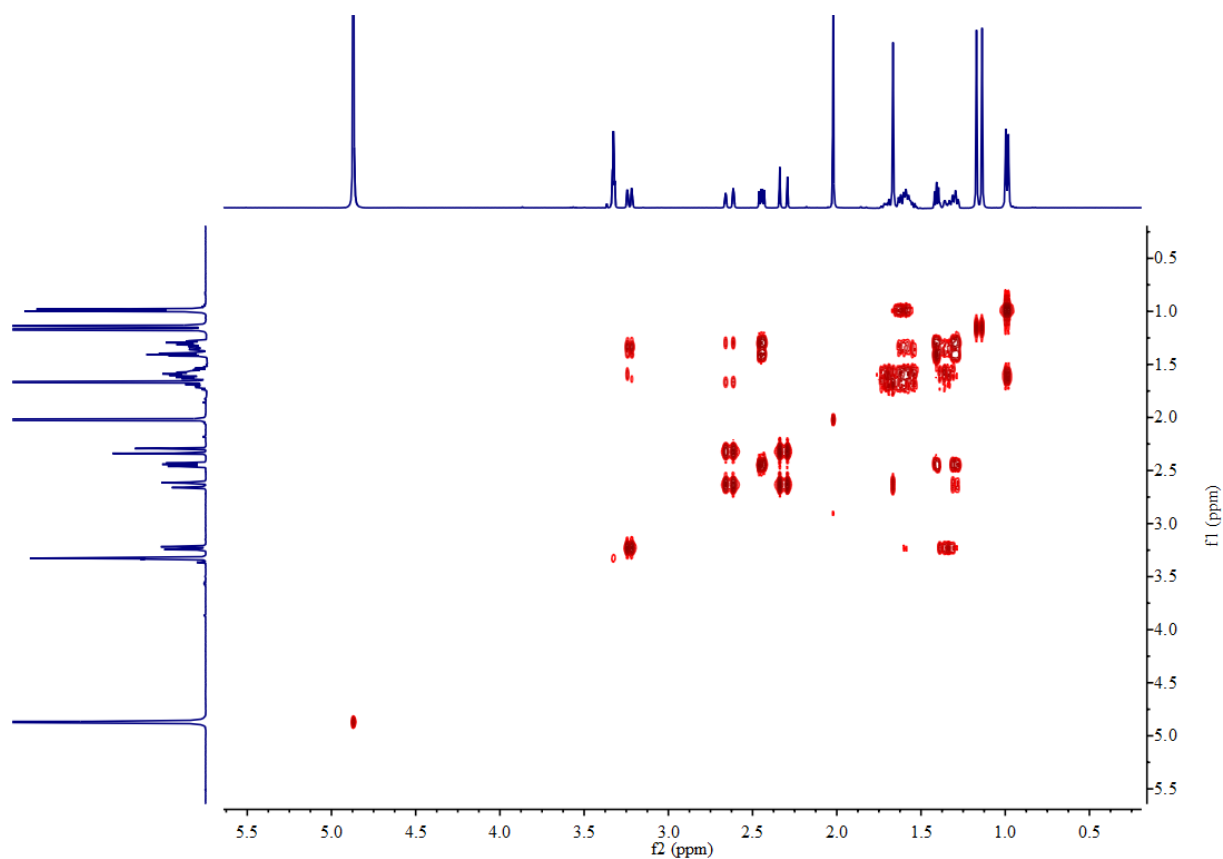

Figure S82  $^1\text{H}$ - $^1\text{H}$  COSY spectrum of **3a** in methanol- $d_4$  (400 MHz).

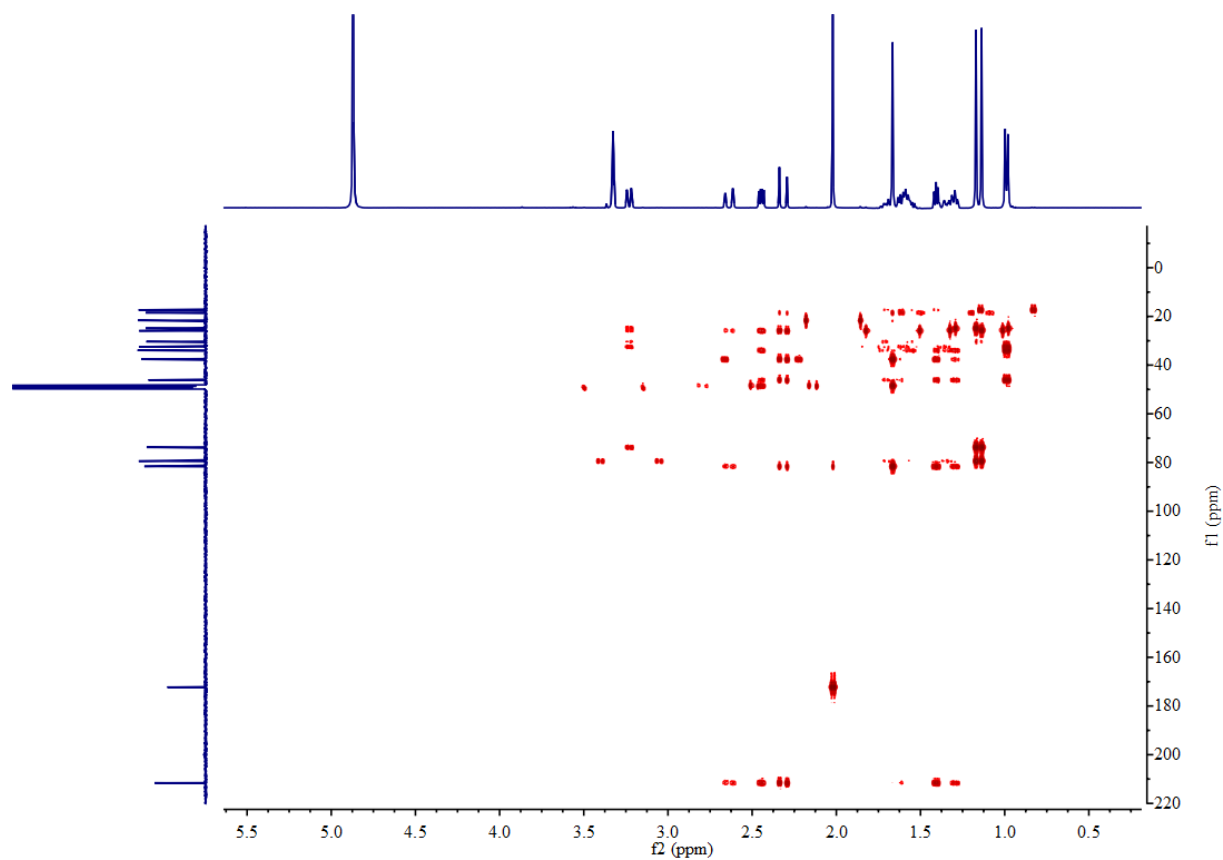

Figure S83 HMBC spectrum of **3a** in methanol- $d_4$  (400 MHz).

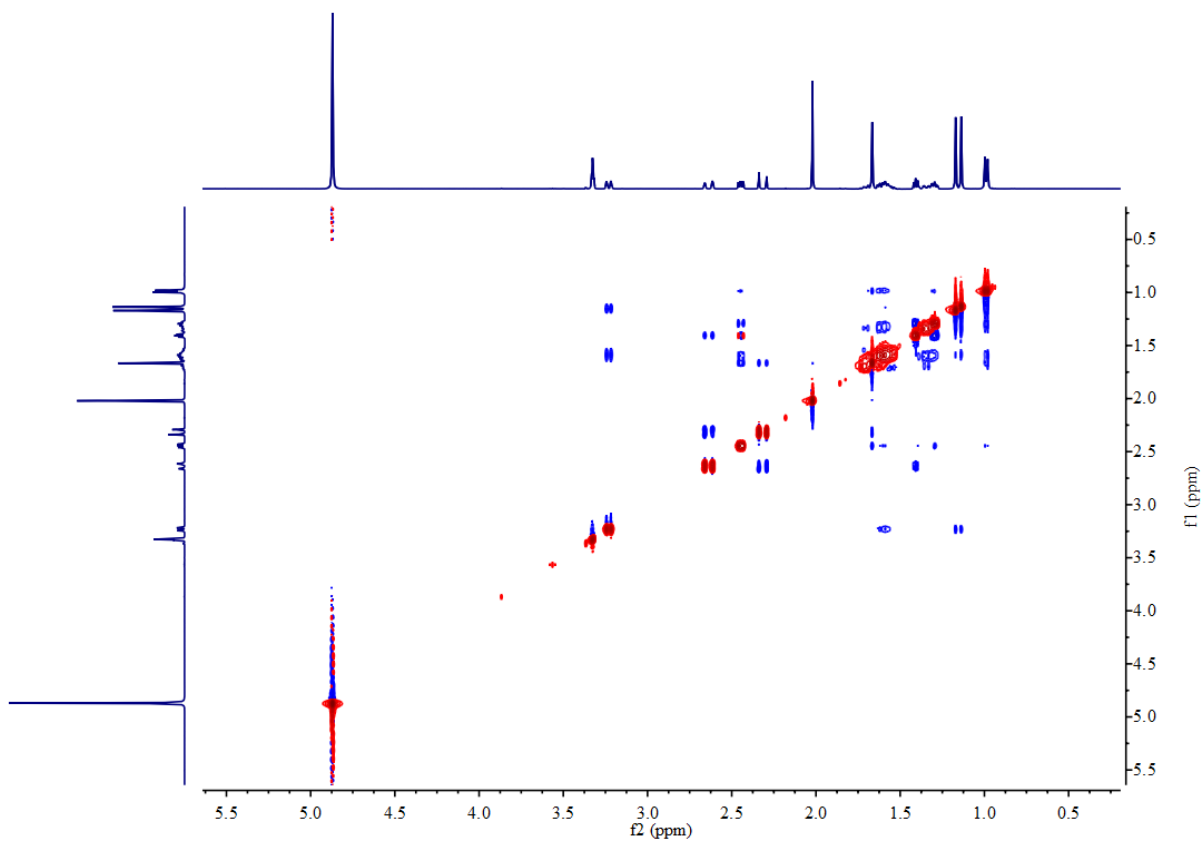

Figure S84 NOESY spectrum of **3a** in methanol-*d*<sub>4</sub> (400 MHz).

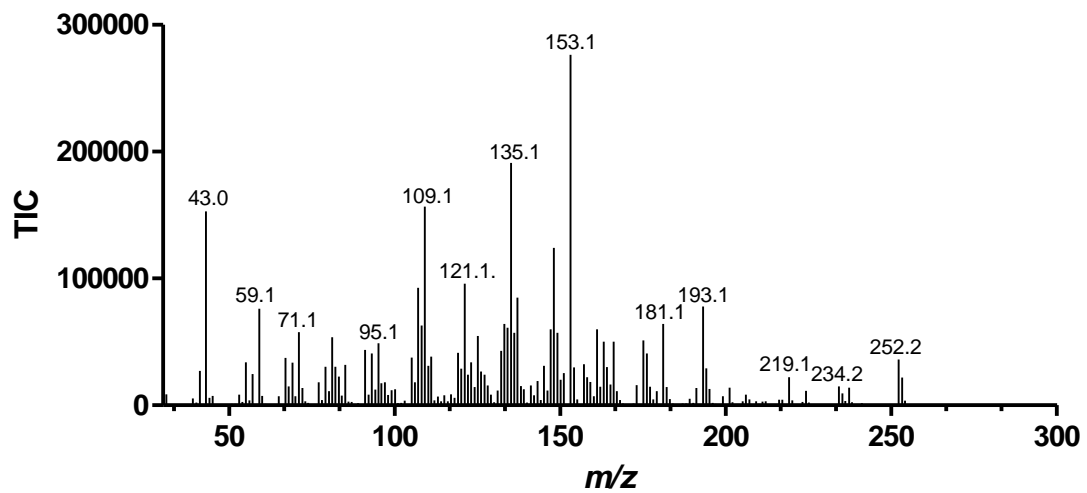

Figure S85 EI mass spectrum of **3a**.

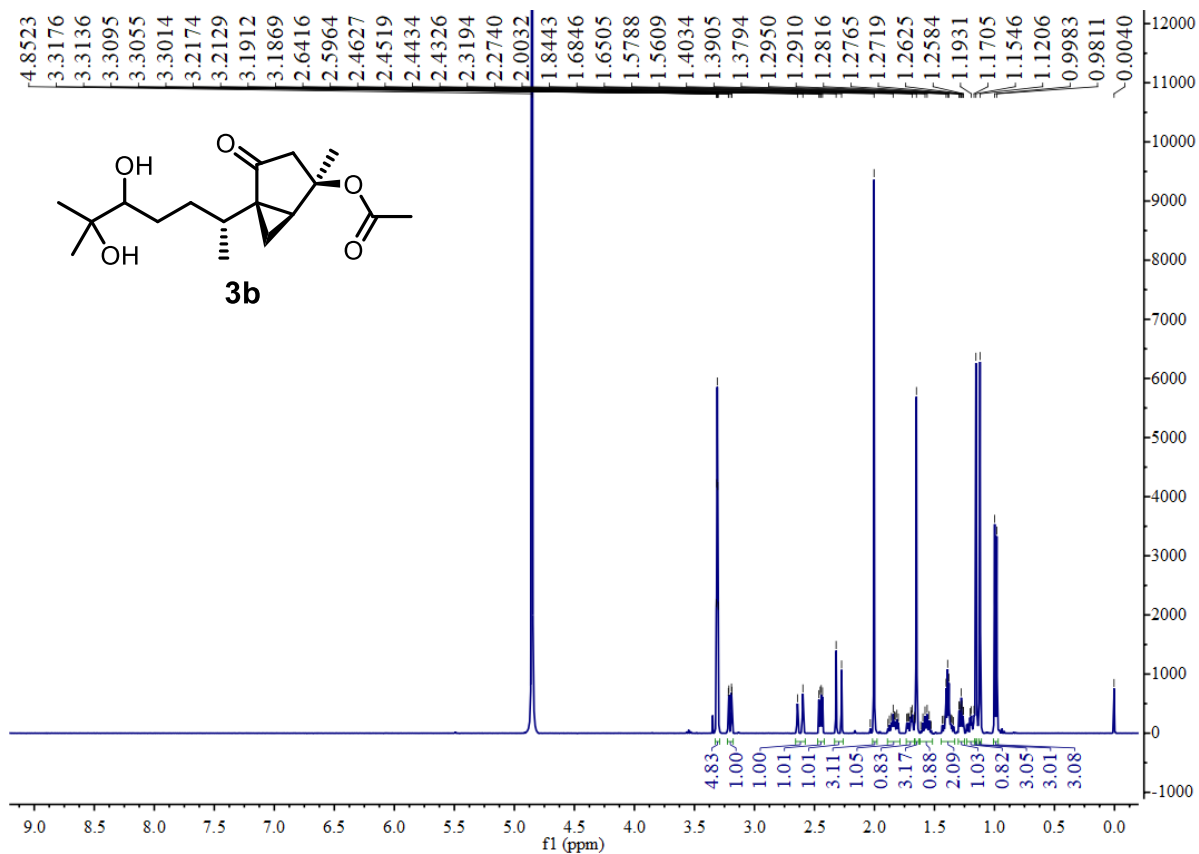

Figure S86  $^1\text{H}$  NMR spectrum of **3b** in methanol- $d_4$  (400 MHz).

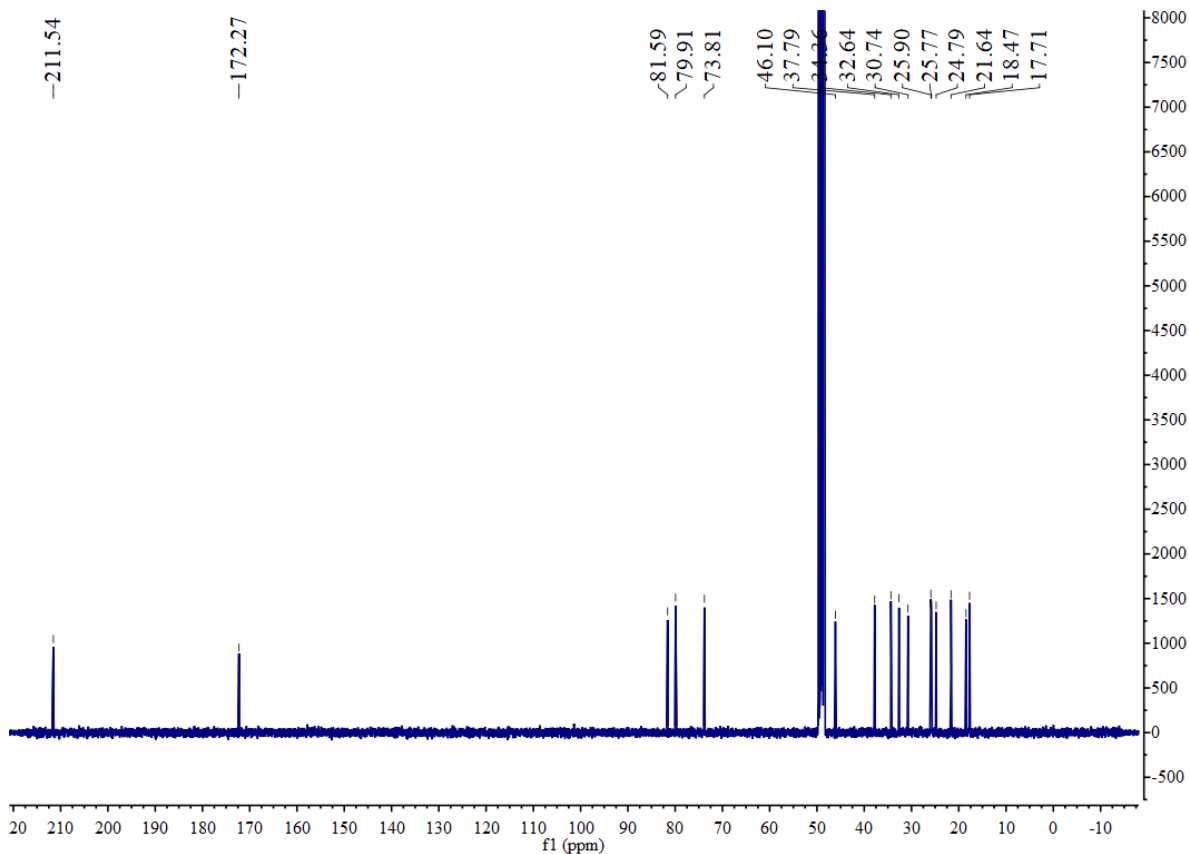

Figure S87  $^{13}\text{C}$  NMR spectrum of **3b** in methanol- $d_4$  (100 MHz).

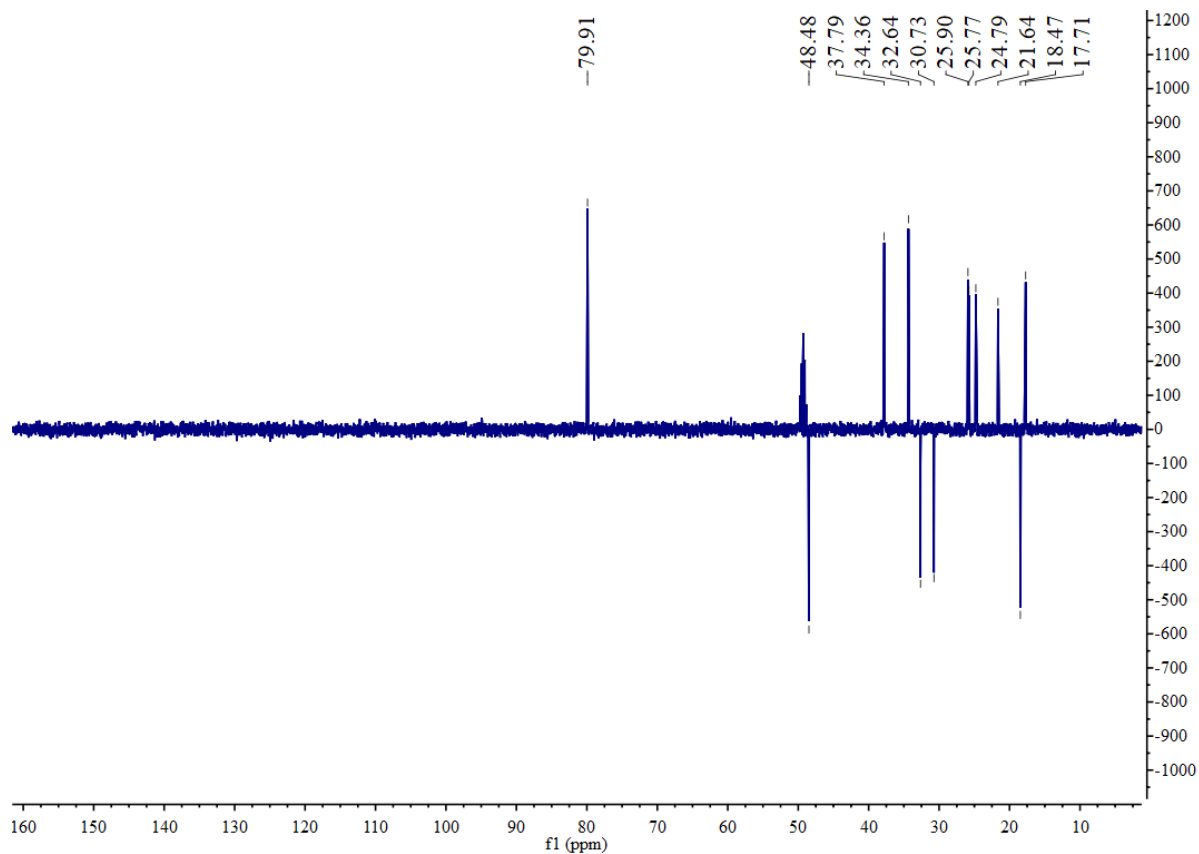

Figure S88 DEPT-135 NMR spectrum of **3b** in methanol- $d_4$  (100 MHz).

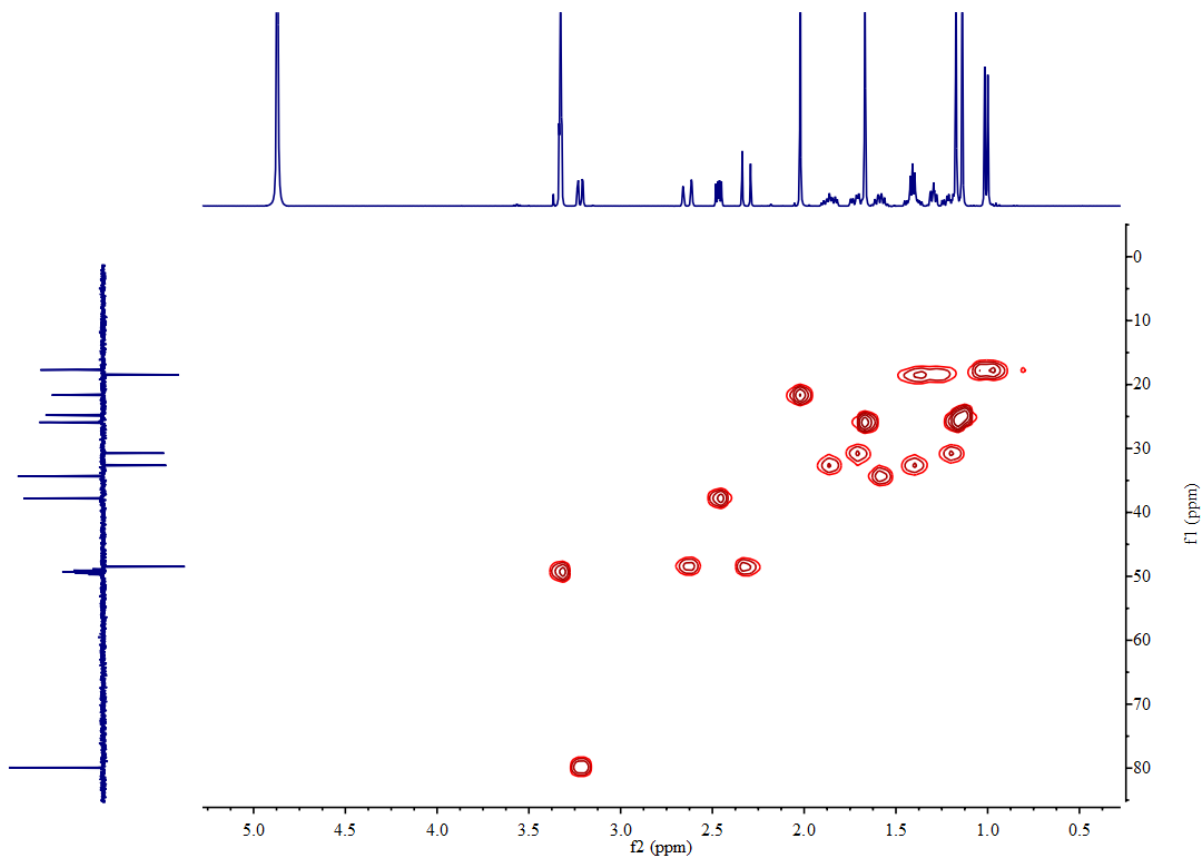

Figure S89 HSQC spectrum of **3b** in methanol- $d_4$  (400 MHz).

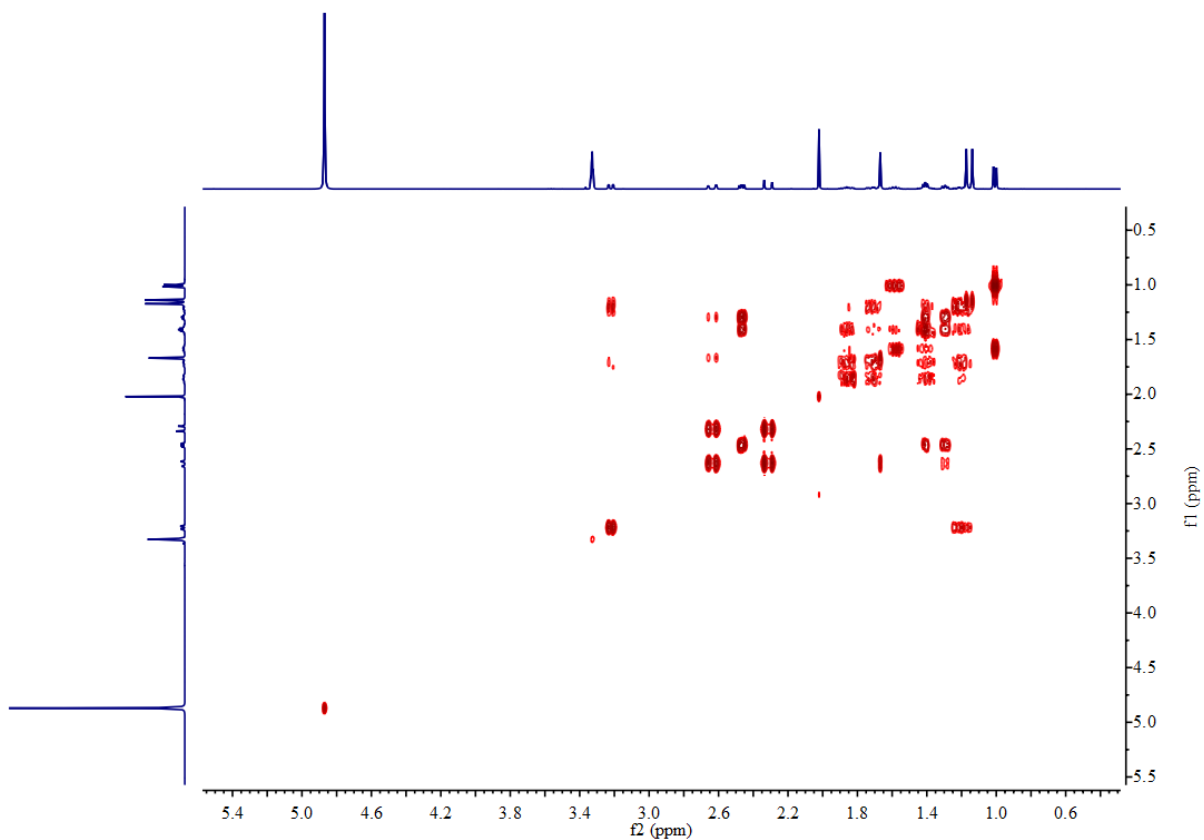

Figure S90  $^1\text{H}$ - $^1\text{H}$  COSY spectrum of **3b** in methanol- $d_4$  (400 MHz).

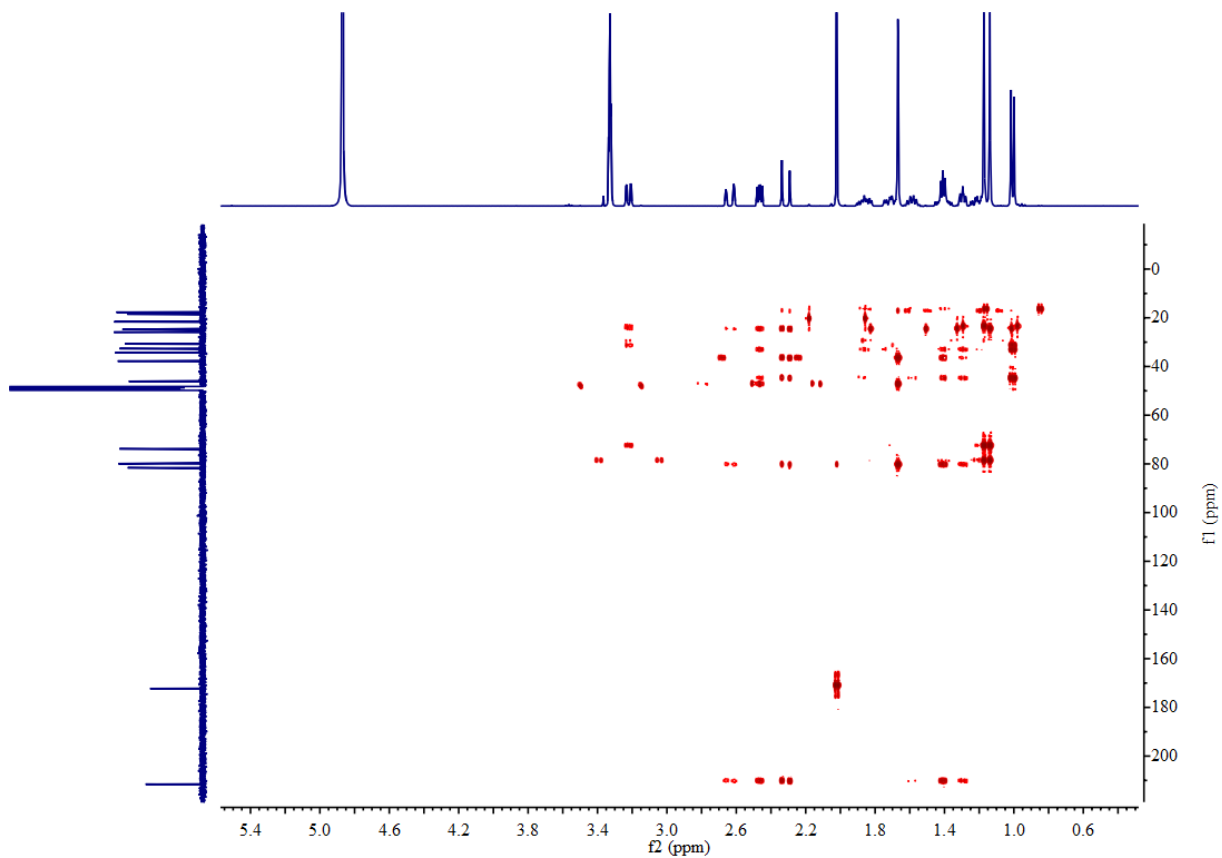

Figure S91 HMBC spectrum of **3b** in methanol- $d_4$  (400 MHz).

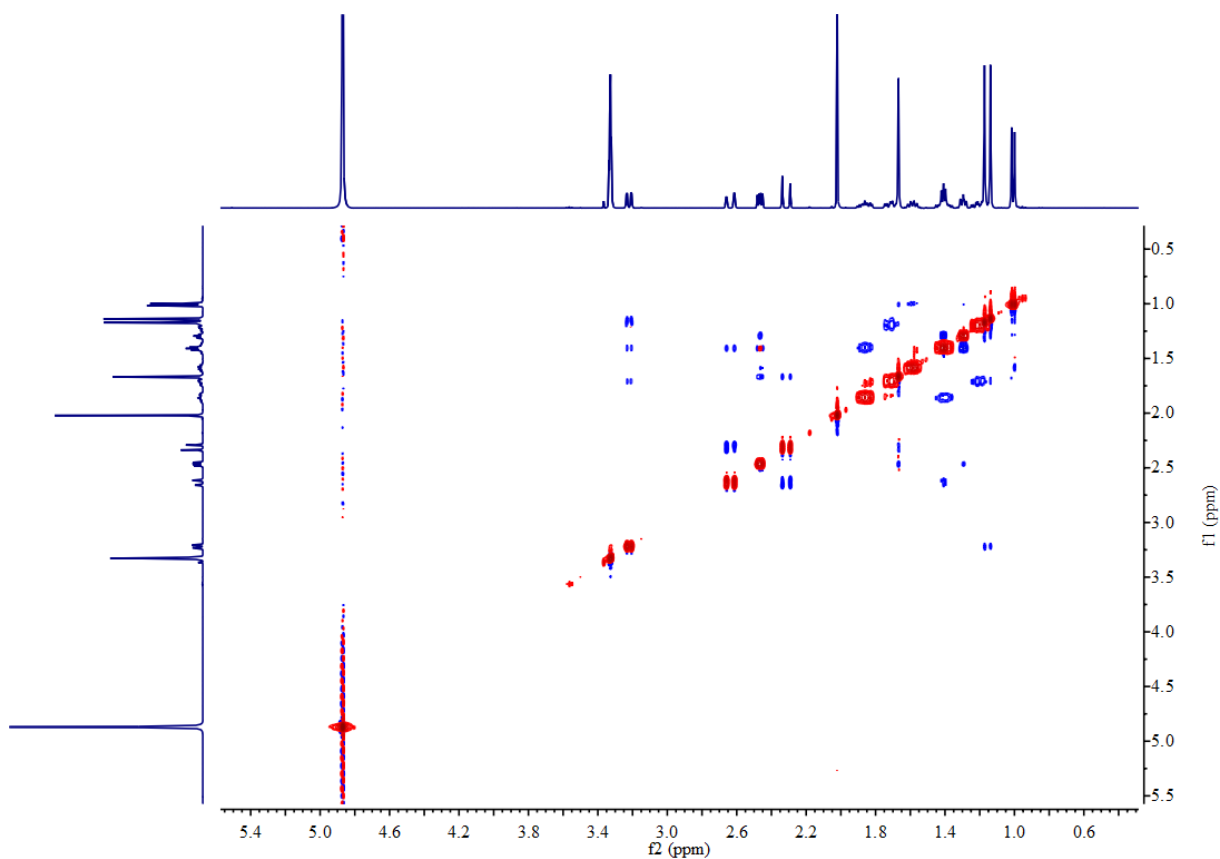

Figure S92 NOESY spectrum of **3b** in methanol- $d_4$  (400 MHz).

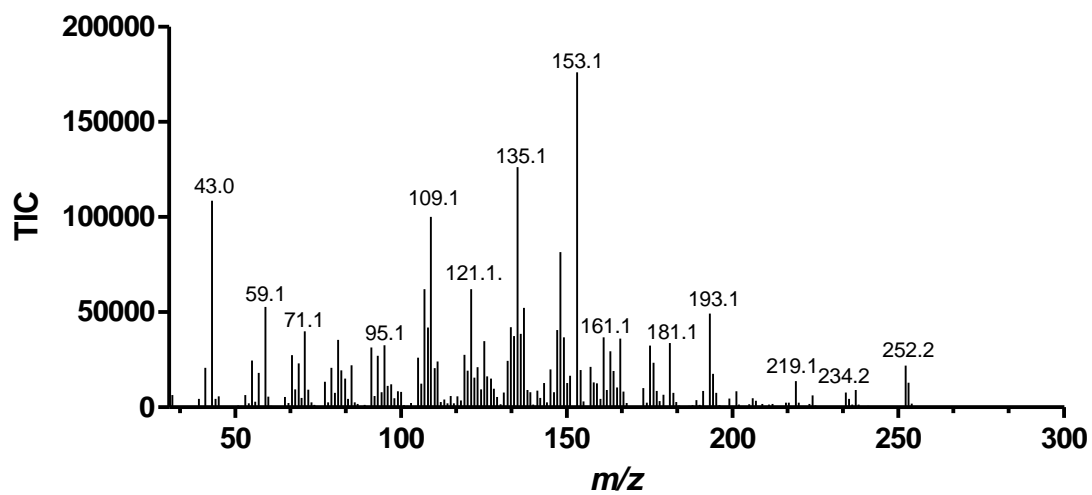

Figure S93 EI mass spectrum of **3b**.

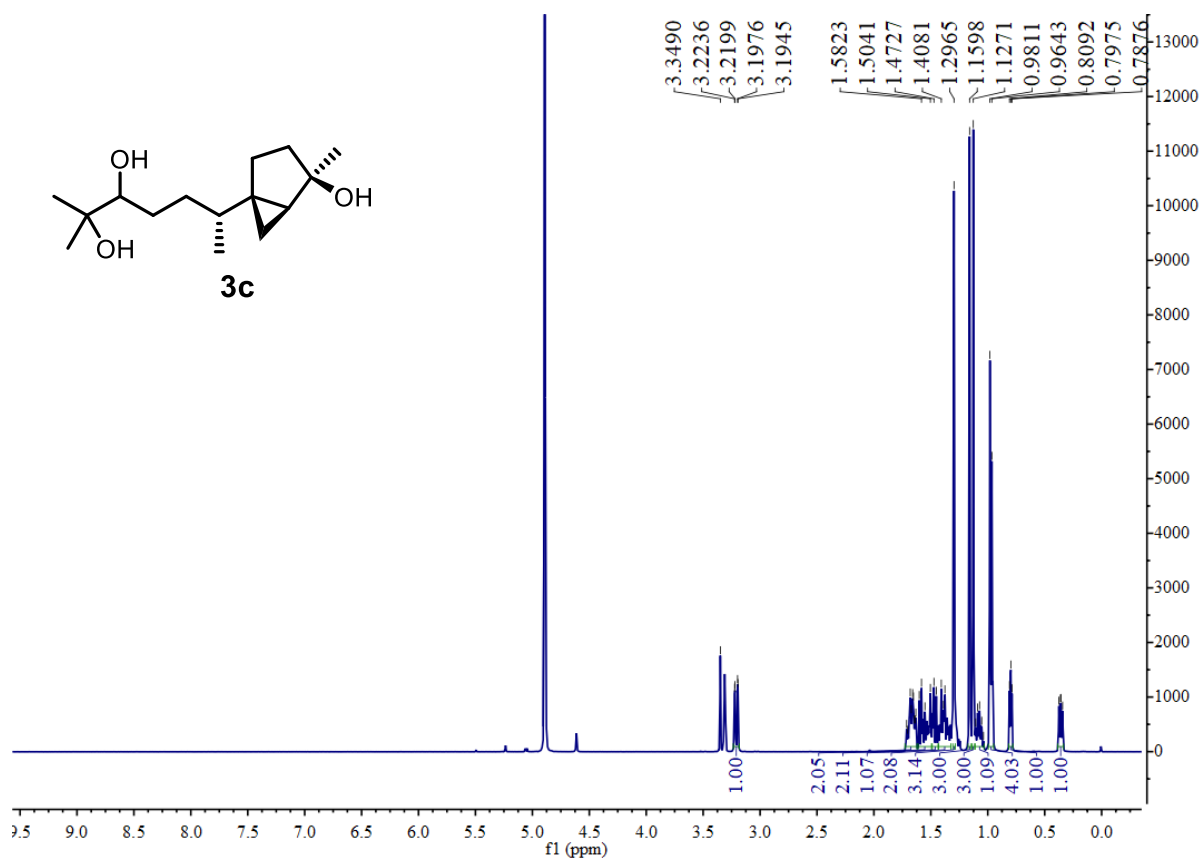

**Figure S94**  $^1\text{H}$  NMR spectrum of **3c** in methanol- $d_4$  (400 MHz).

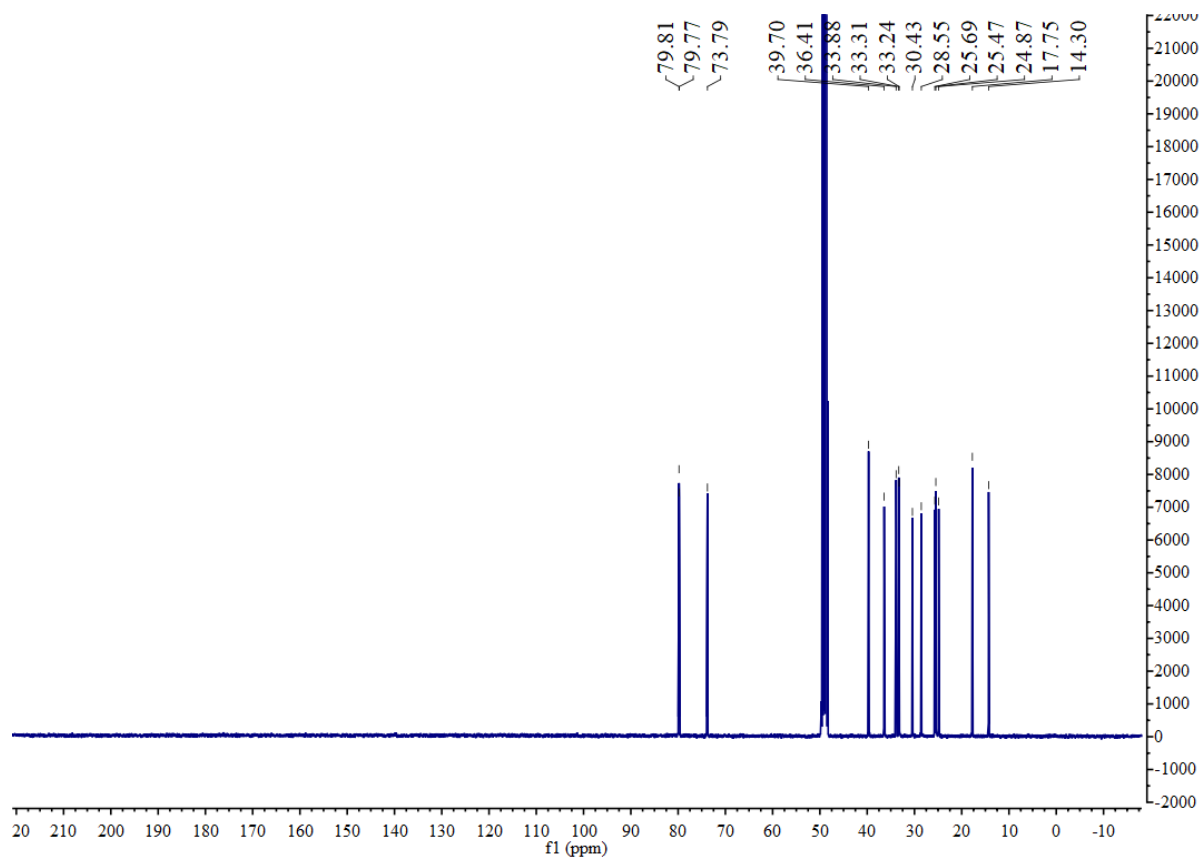

**Figure S95**  $^{13}\text{C}$  NMR spectrum of **3c** in methanol- $d_4$  (100 MHz).



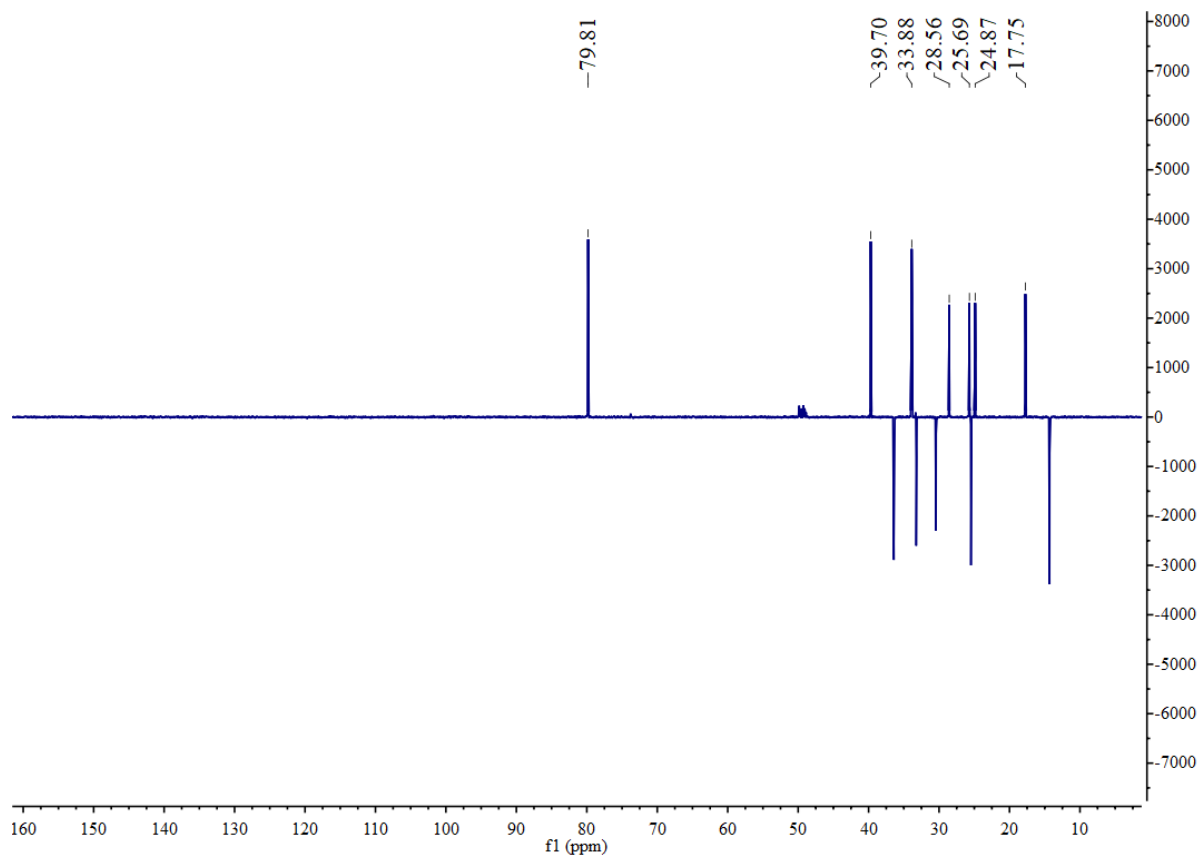

**Figure S96** DEPT-135 NMR spectrum of **3c** in methanol-*d*<sub>4</sub> (100 MHz).

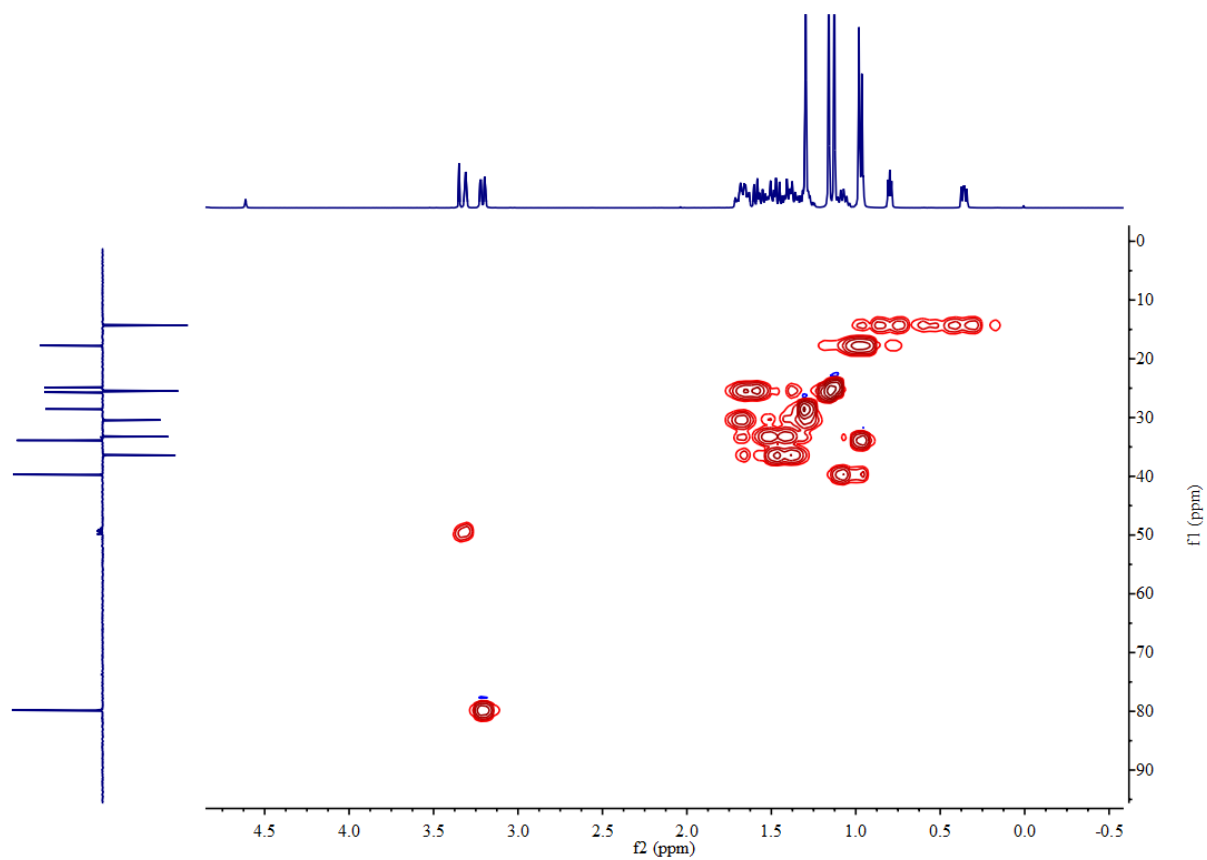

**Figure S97** HSQC spectrum of **3c** in methanol-*d*<sub>4</sub> (400 MHz).

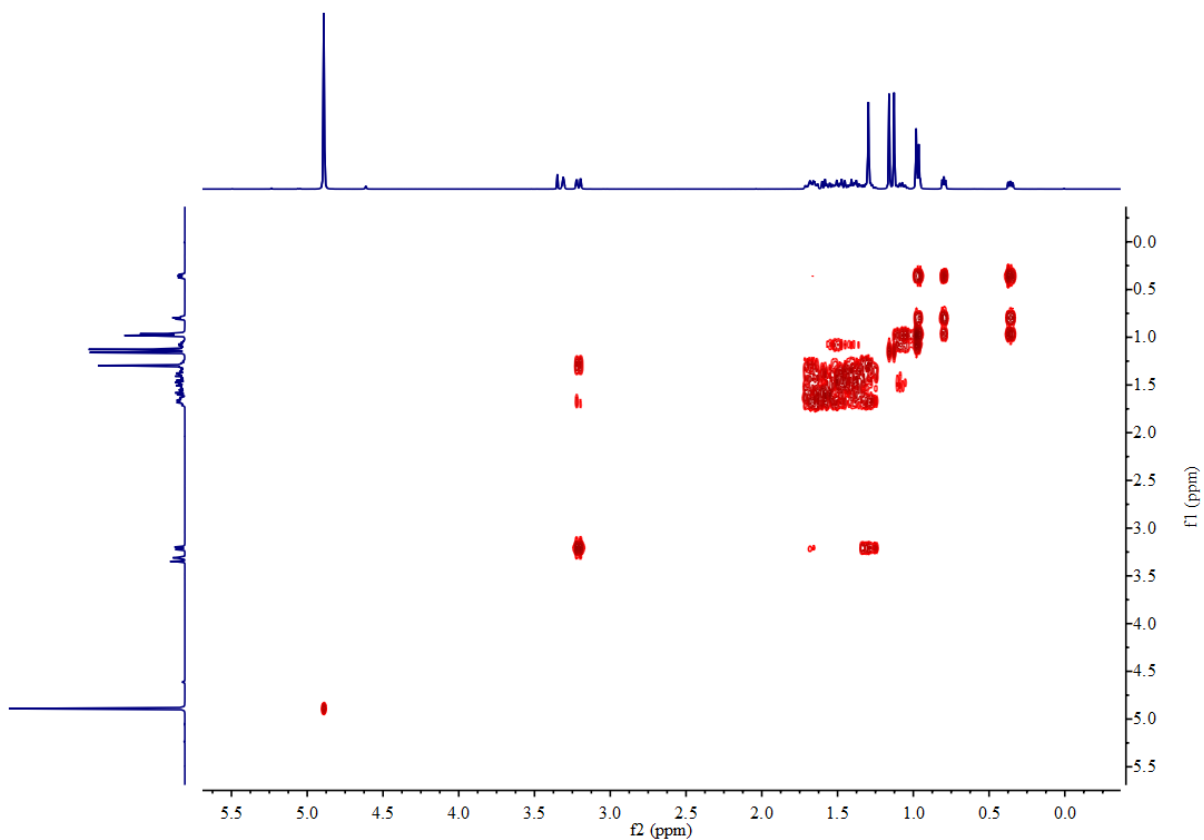

Figure S98 <sup>1</sup>H-<sup>1</sup>H COSY spectrum of **3c** in methanol-*d*<sub>4</sub> (400 MHz).

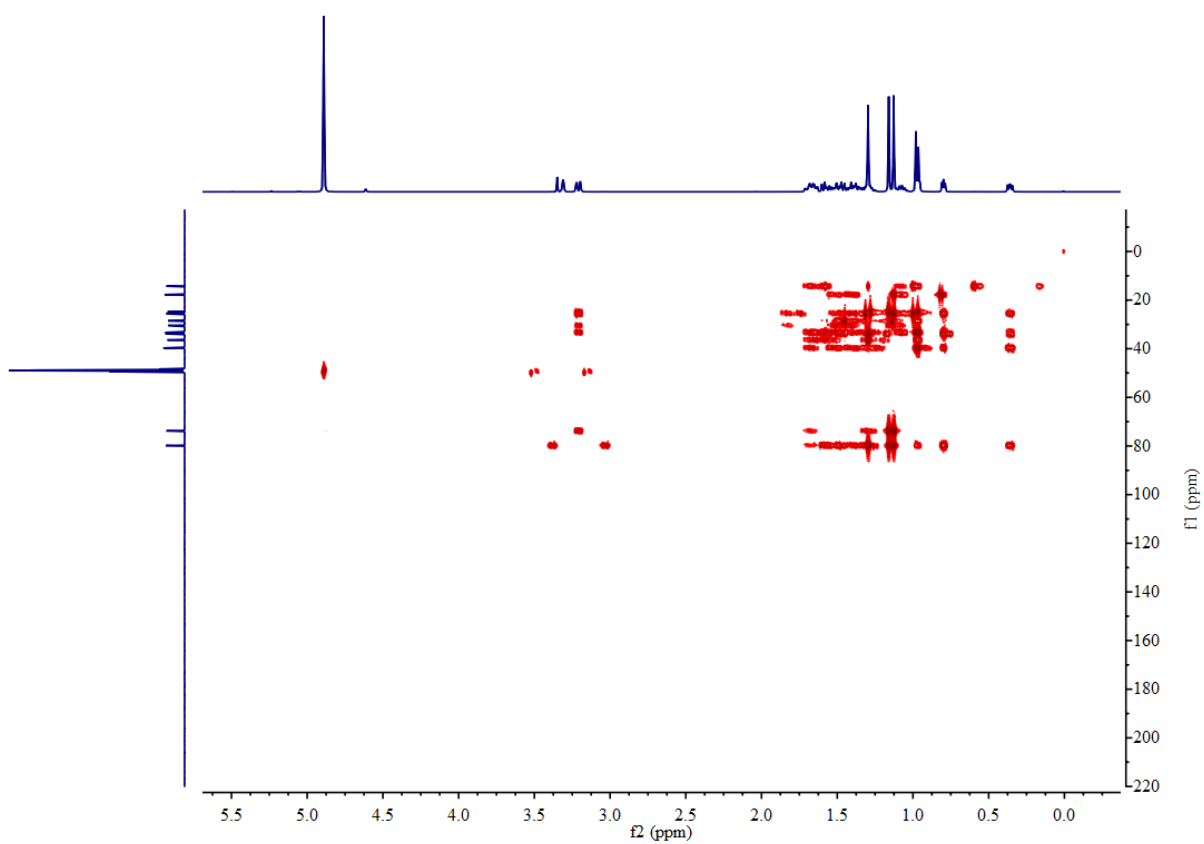

Figure S99 HMBC spectrum of **3c** in methanol-*d*<sub>4</sub> (400 MHz).

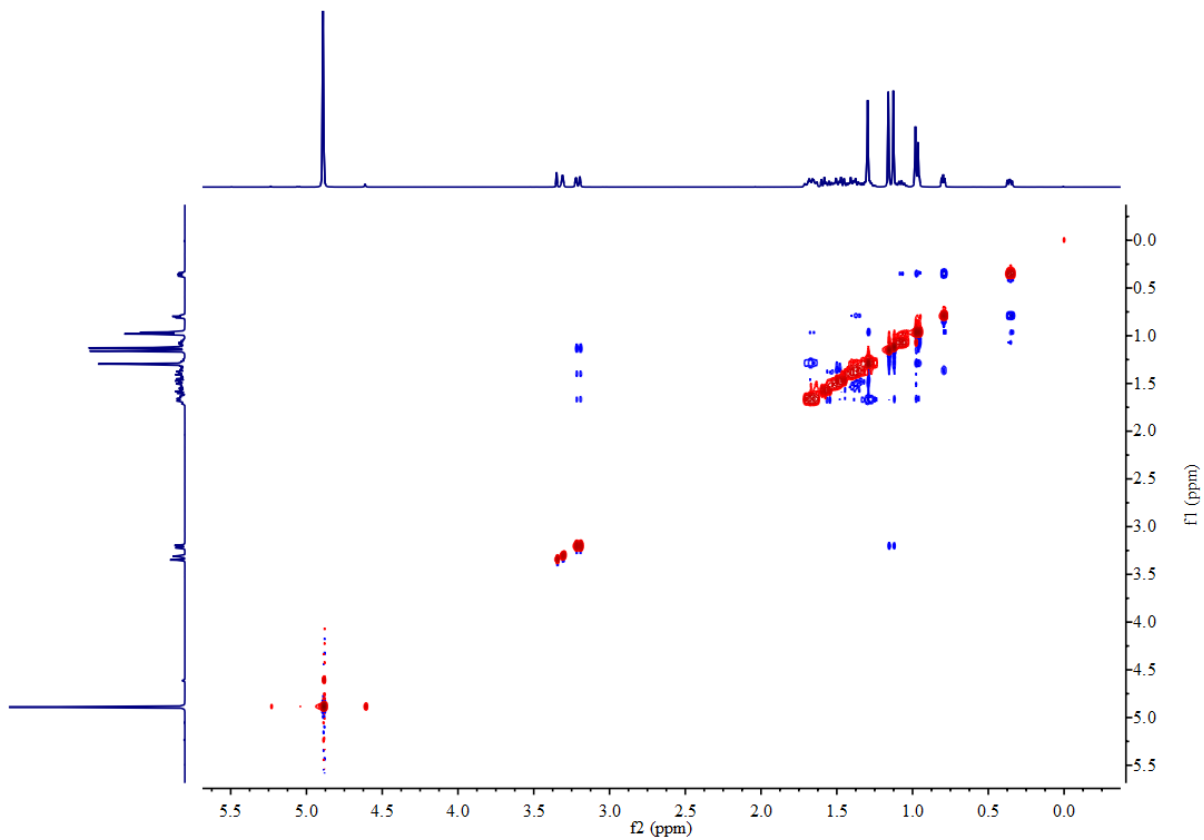

Figure S100 NOESY spectrum of **3c** in methanol-*d*<sub>4</sub> (400 MHz).

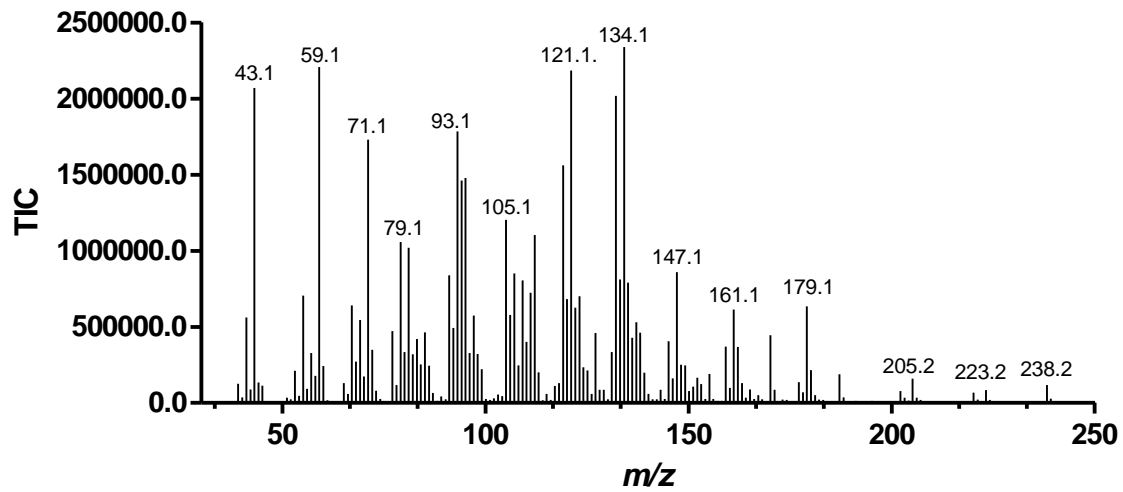

Figure S101 EI mass spectrum of **3c**.

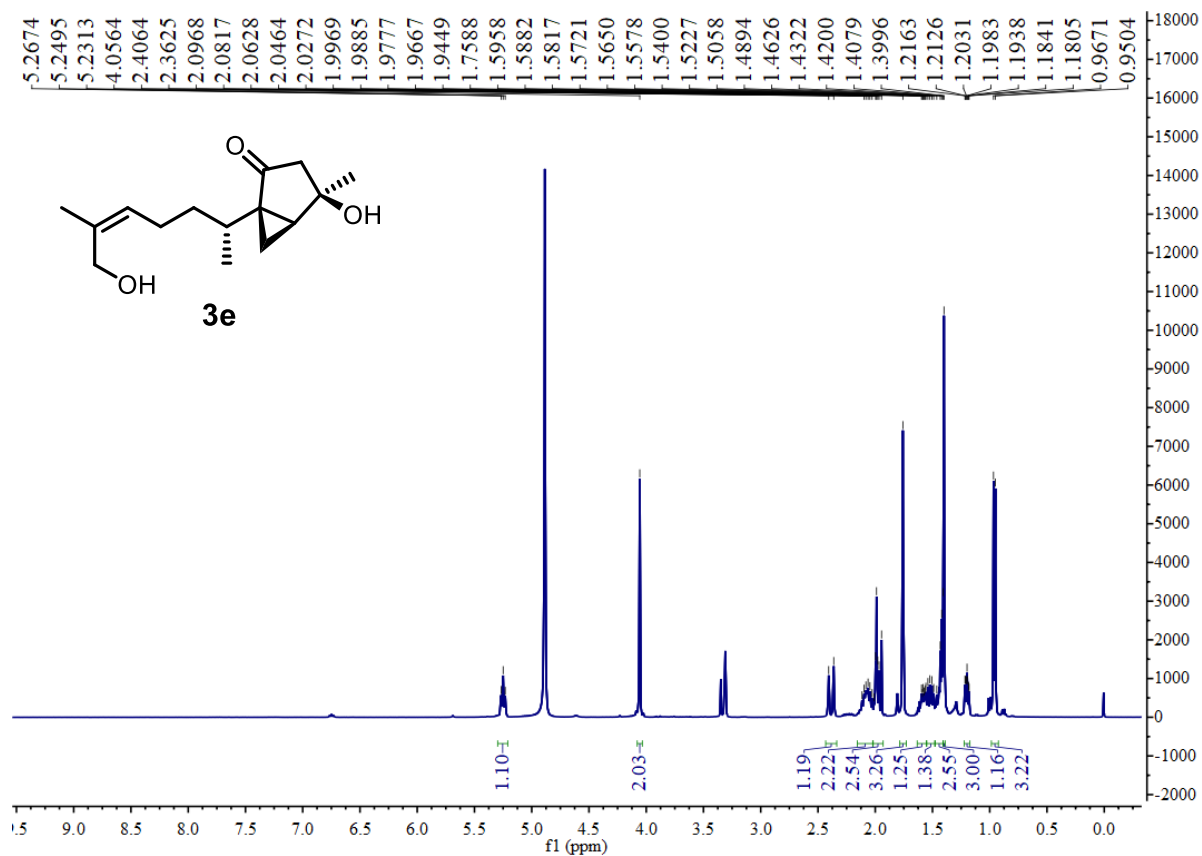

**Figure S102**  $^1\text{H}$  NMR spectrum of **3e** in methanol- $d_4$  (400 MHz).

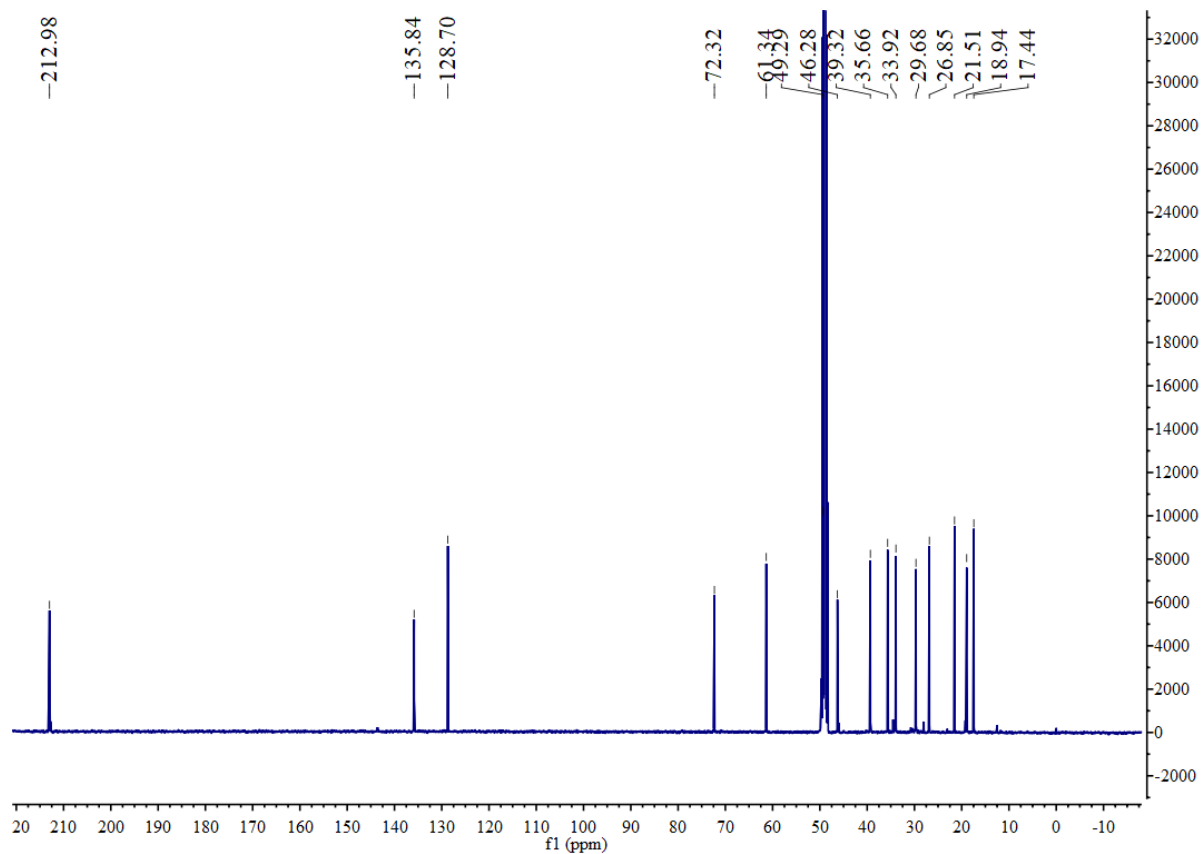

**Figure S103**  $^{13}\text{C}$  NMR spectrum of **3e** in methanol- $d_4$  (100 MHz).

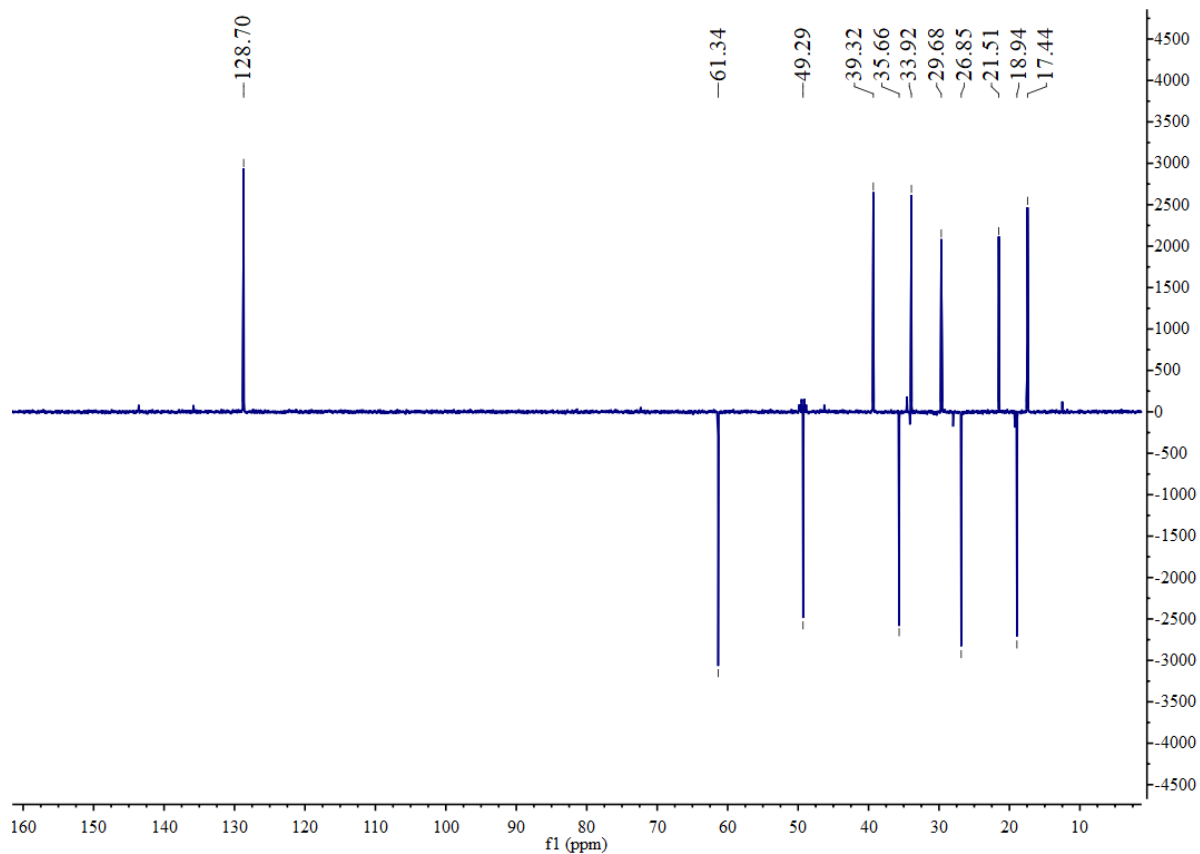

Figure S104 DEPT-135 NMR spectrum of **3e** in methanol- $d_4$  (100 MHz).

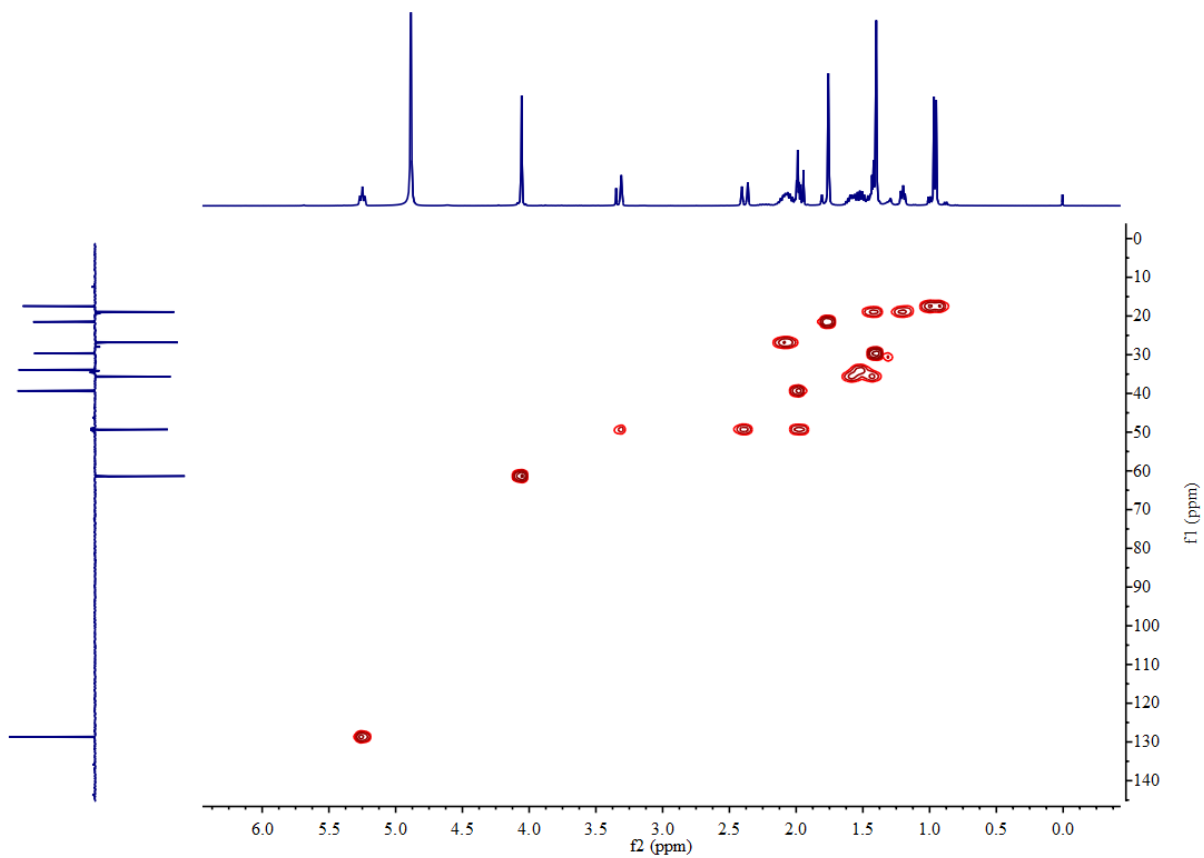

Figure S105 HSQC spectrum of **3e** in methanol- $d_4$  (400 MHz).

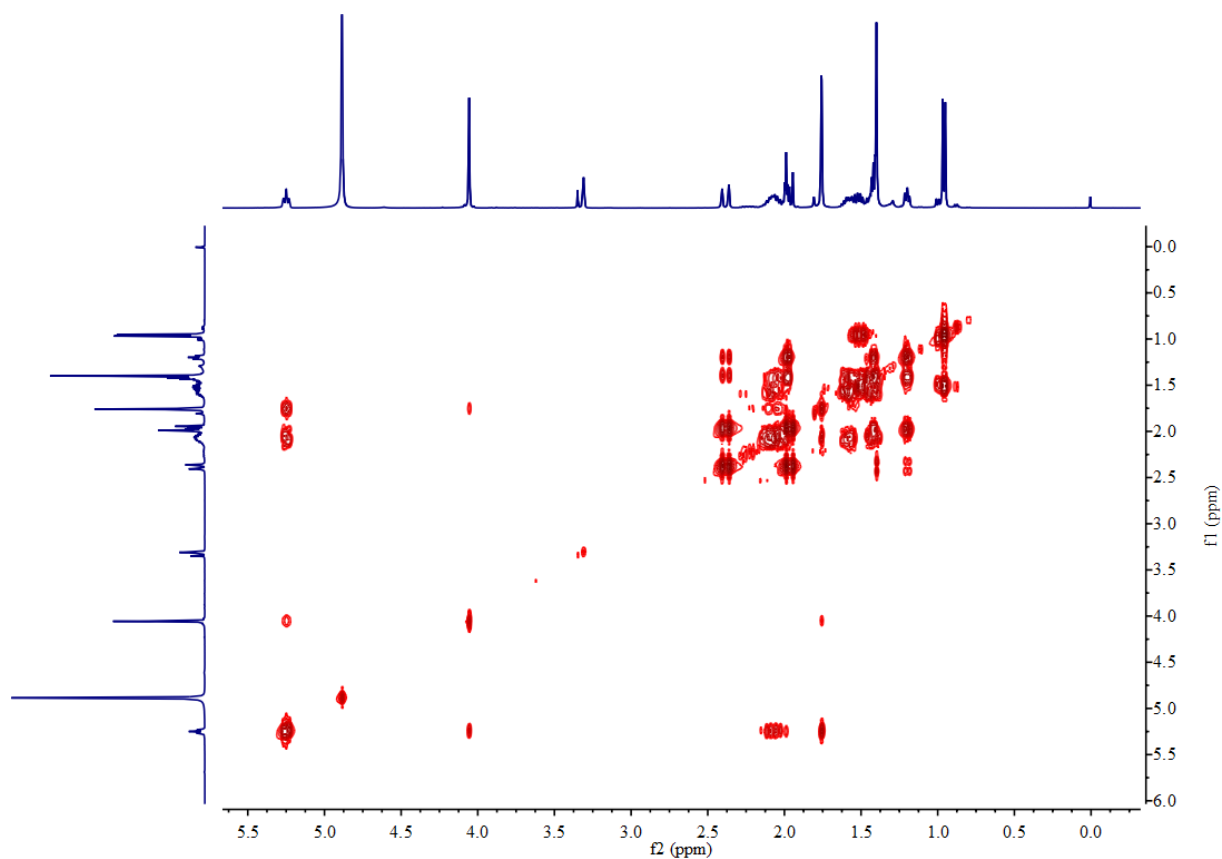

**Figure S106**  $^1\text{H}$ - $^1\text{H}$  COSY spectrum of **3e** in methanol- $d_4$  (400 MHz).

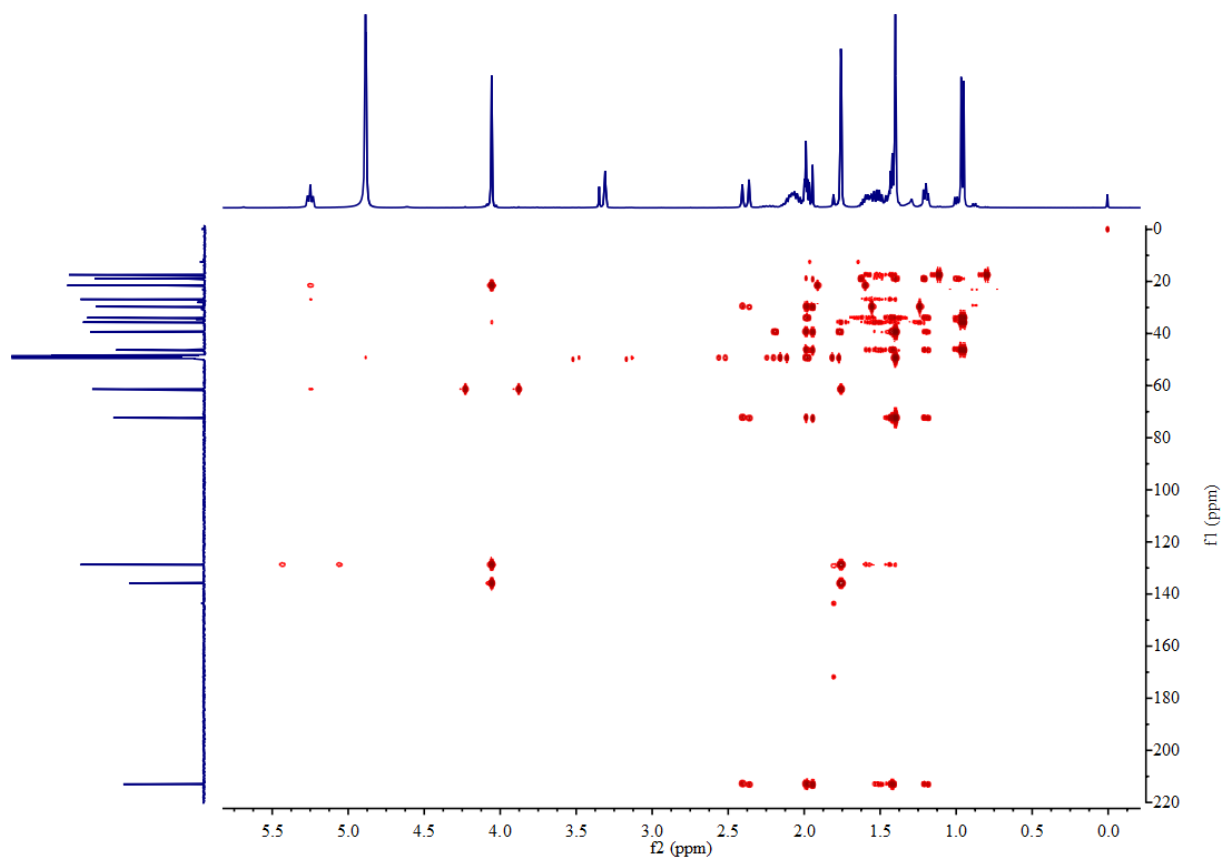

**Figure S107** HMBC spectrum of **3e** in methanol- $d_4$  (400 MHz).

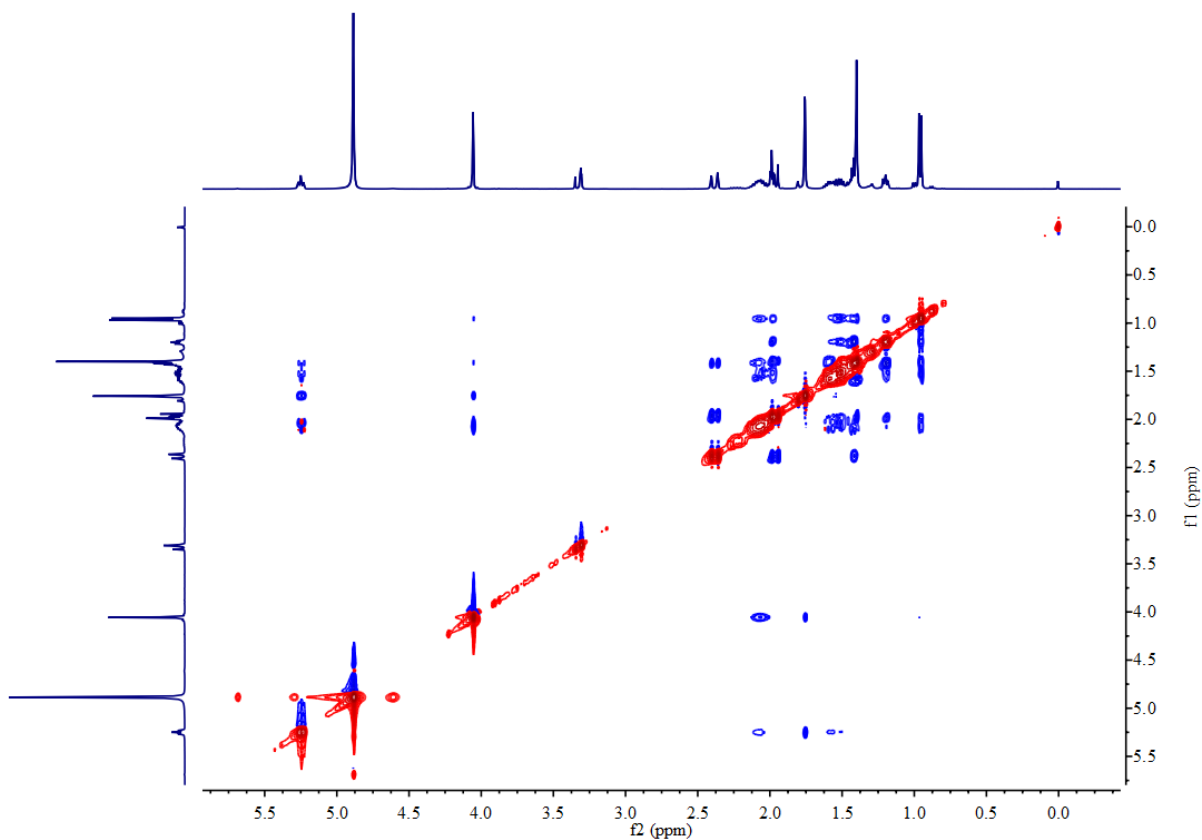

Figure S108 NOESY spectrum of **3e** in methanol-*d*<sub>4</sub> (400 MHz).

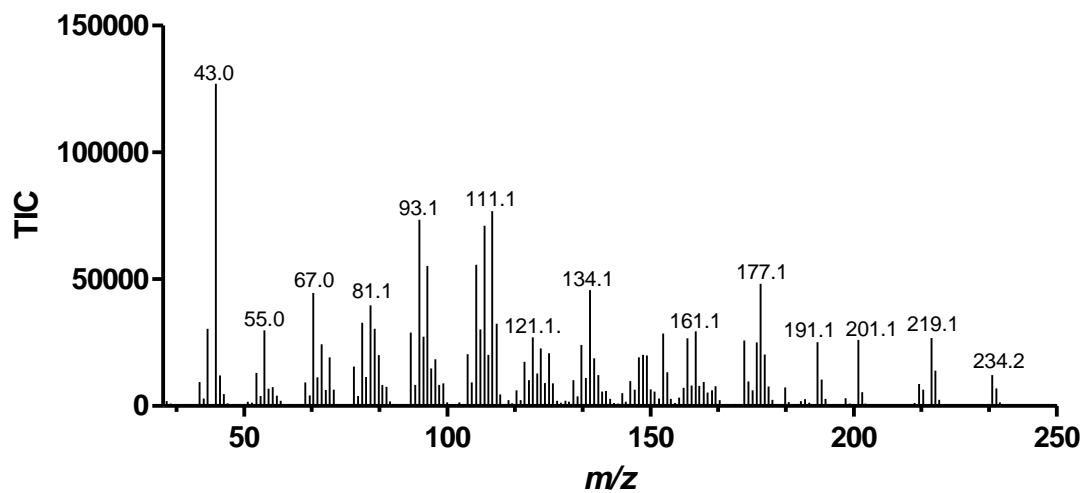

Figure S109 EI mass spectrum of **3e**.

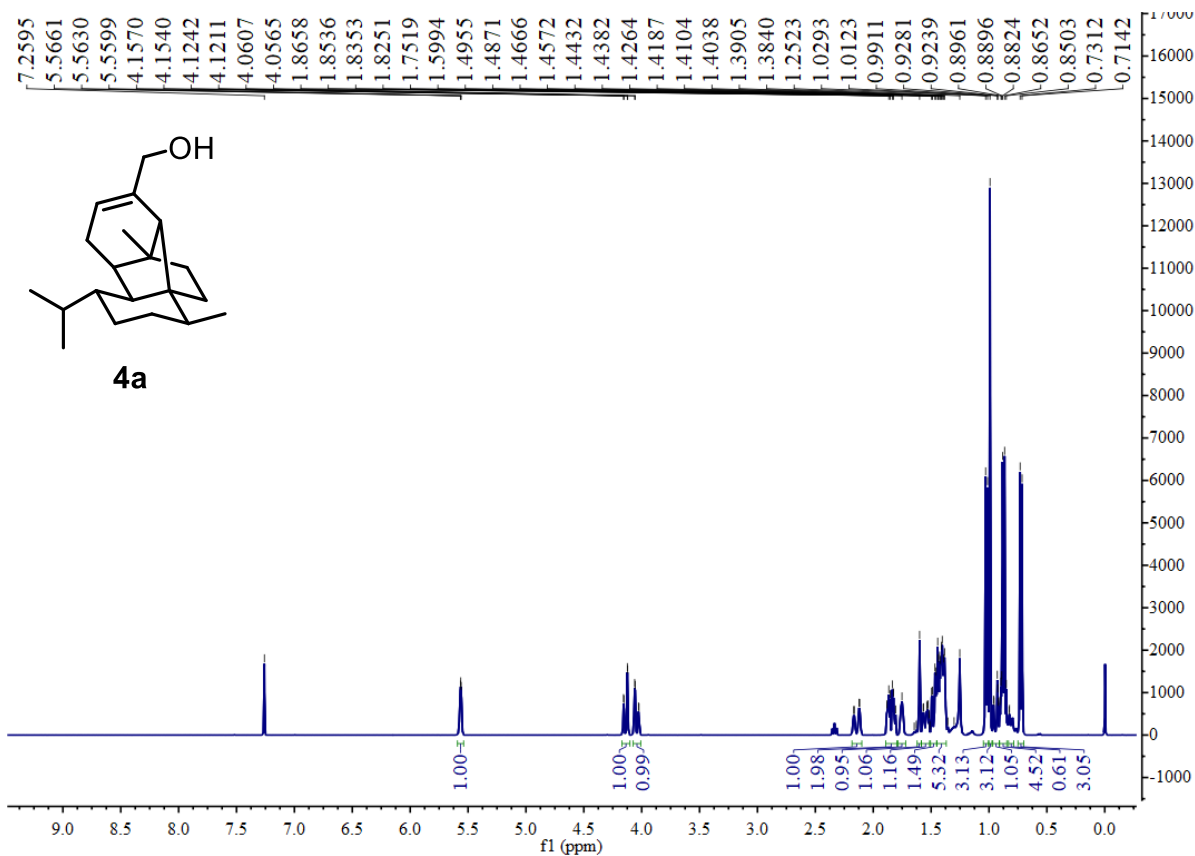

Figure S110 <sup>1</sup>H NMR spectrum of **4a** in CDCl<sub>3</sub> (400 MHz).

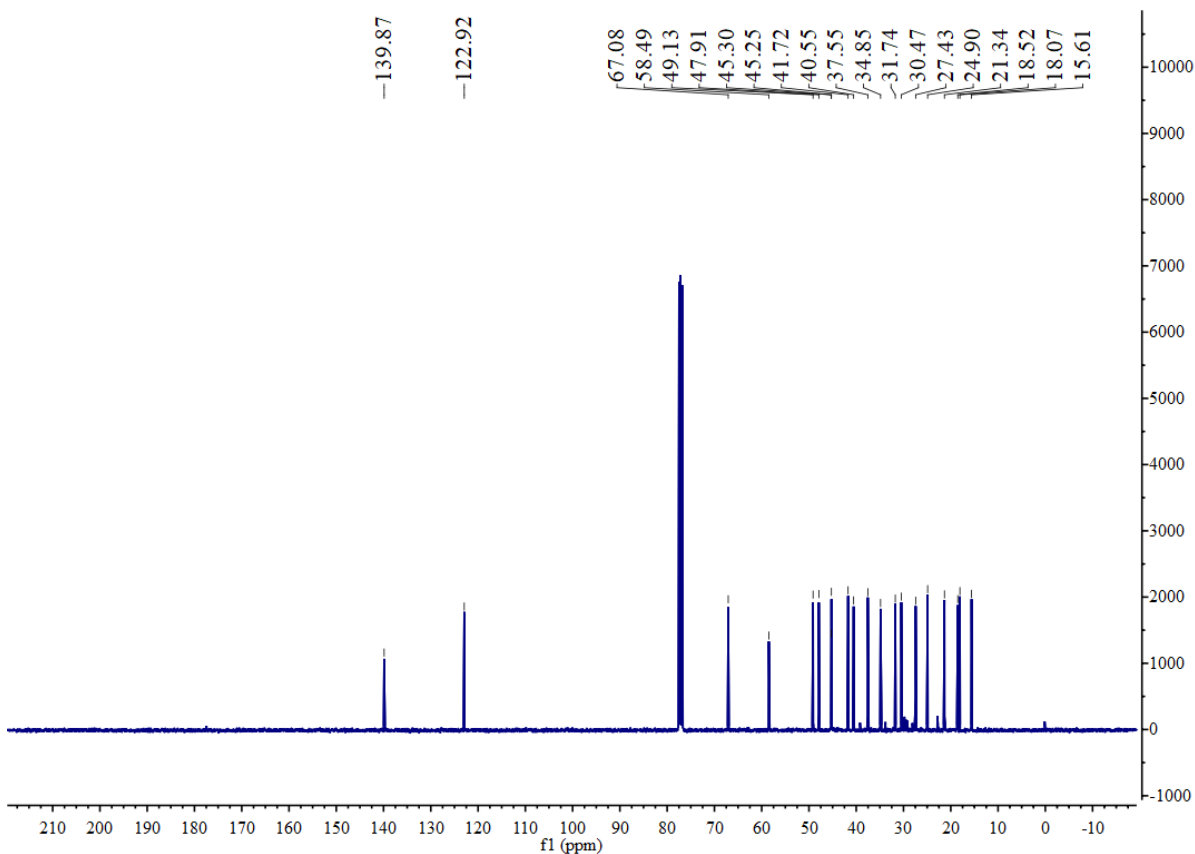

Figure S111 <sup>13</sup>C NMR spectrum of **4a** in CDCl<sub>3</sub> (100 MHz).



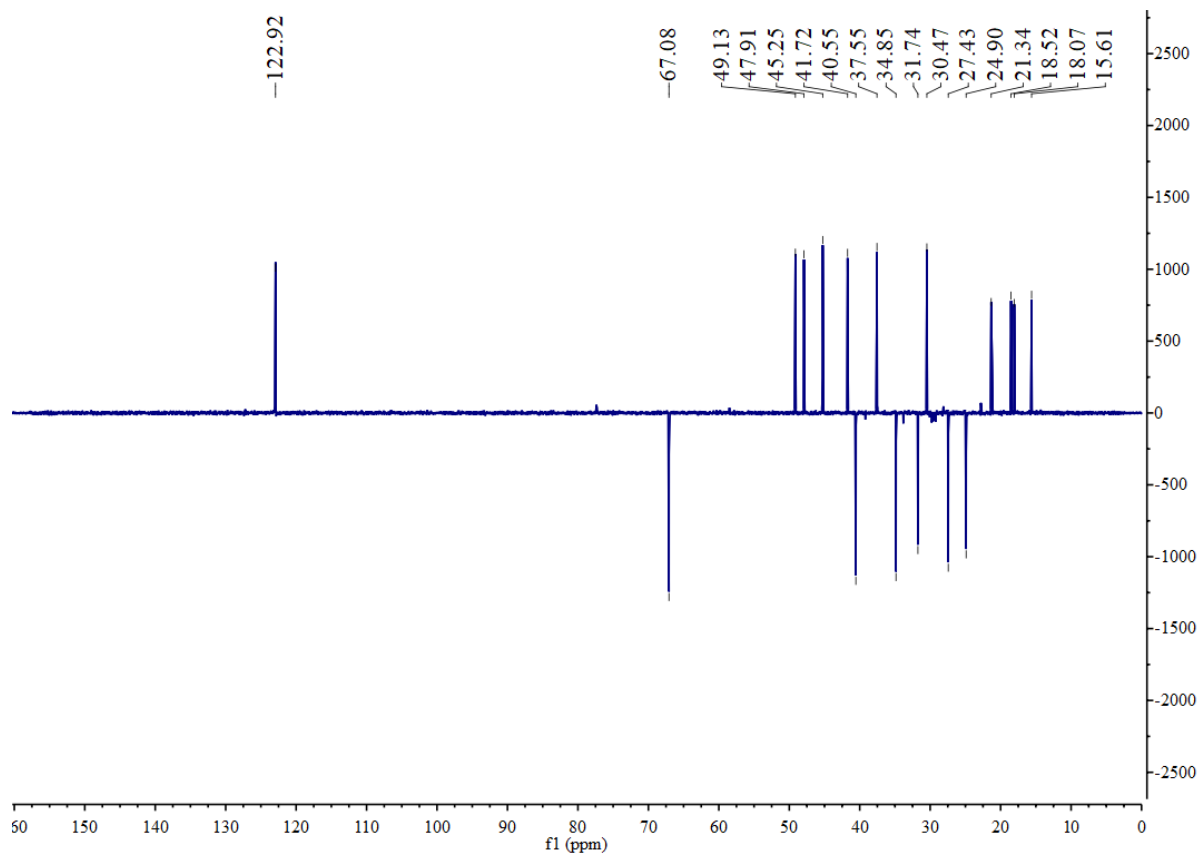

**Figure S112** DEPT-135 NMR spectrum of **4a** in CDCl<sub>3</sub> (100 MHz).

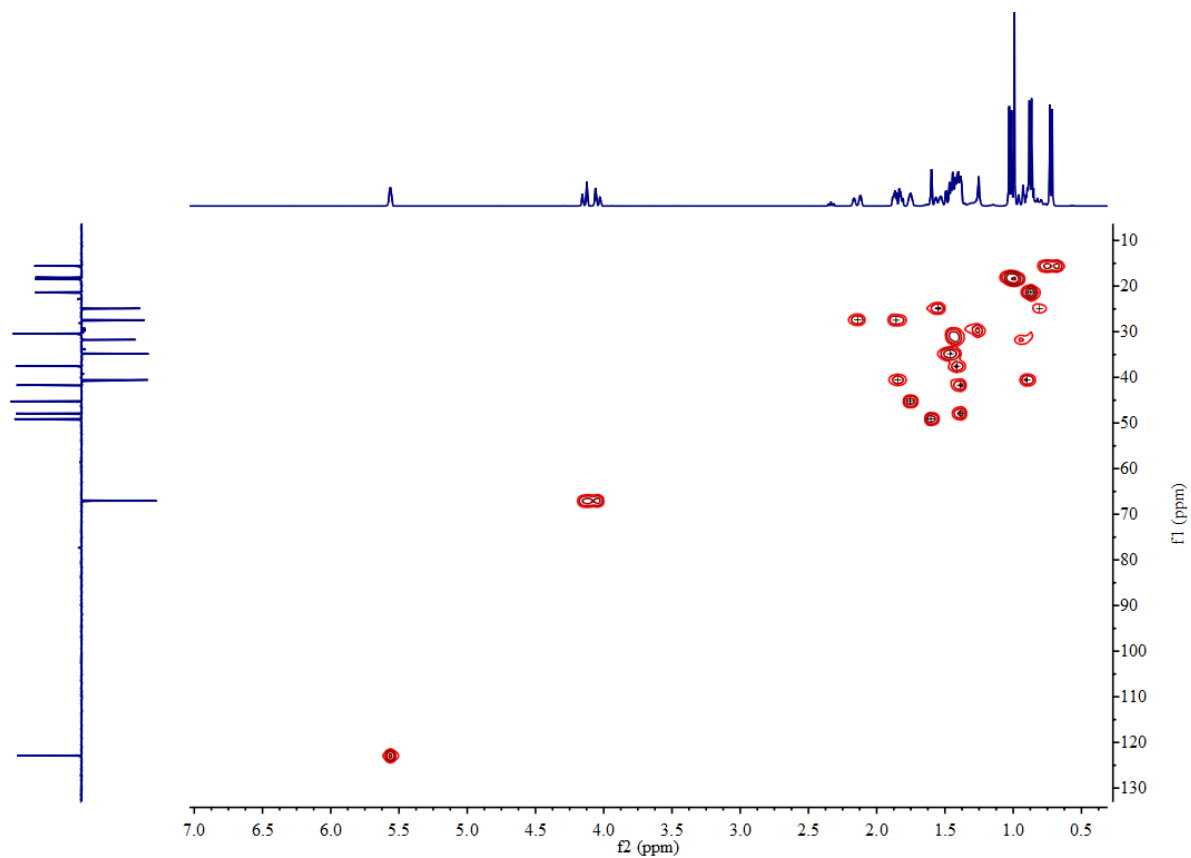

**Figure S113** HSQC spectrum of **4a** in CDCl<sub>3</sub> (400 MHz).

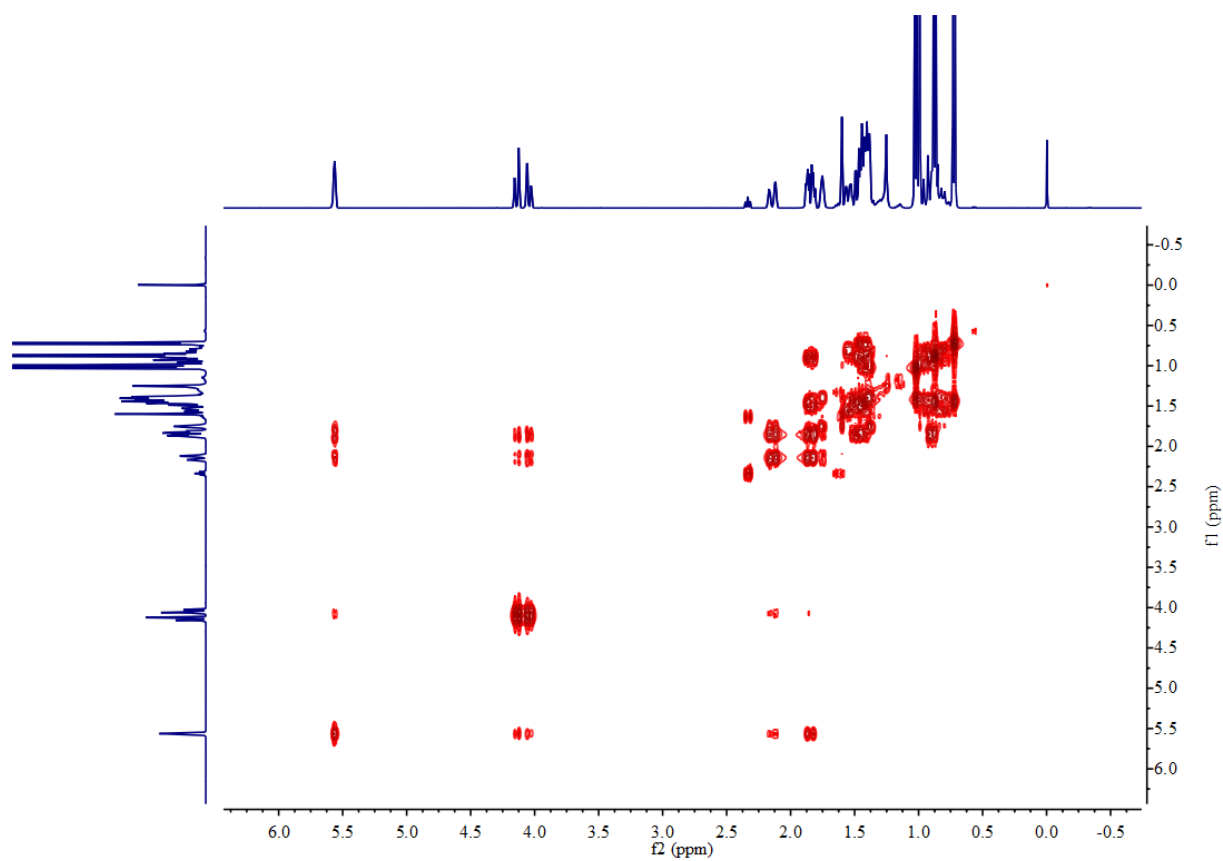

Figure S114  $^1\text{H}$ - $^1\text{H}$  COSY spectrum of **4a** in  $\text{CDCl}_3$  (400 MHz).

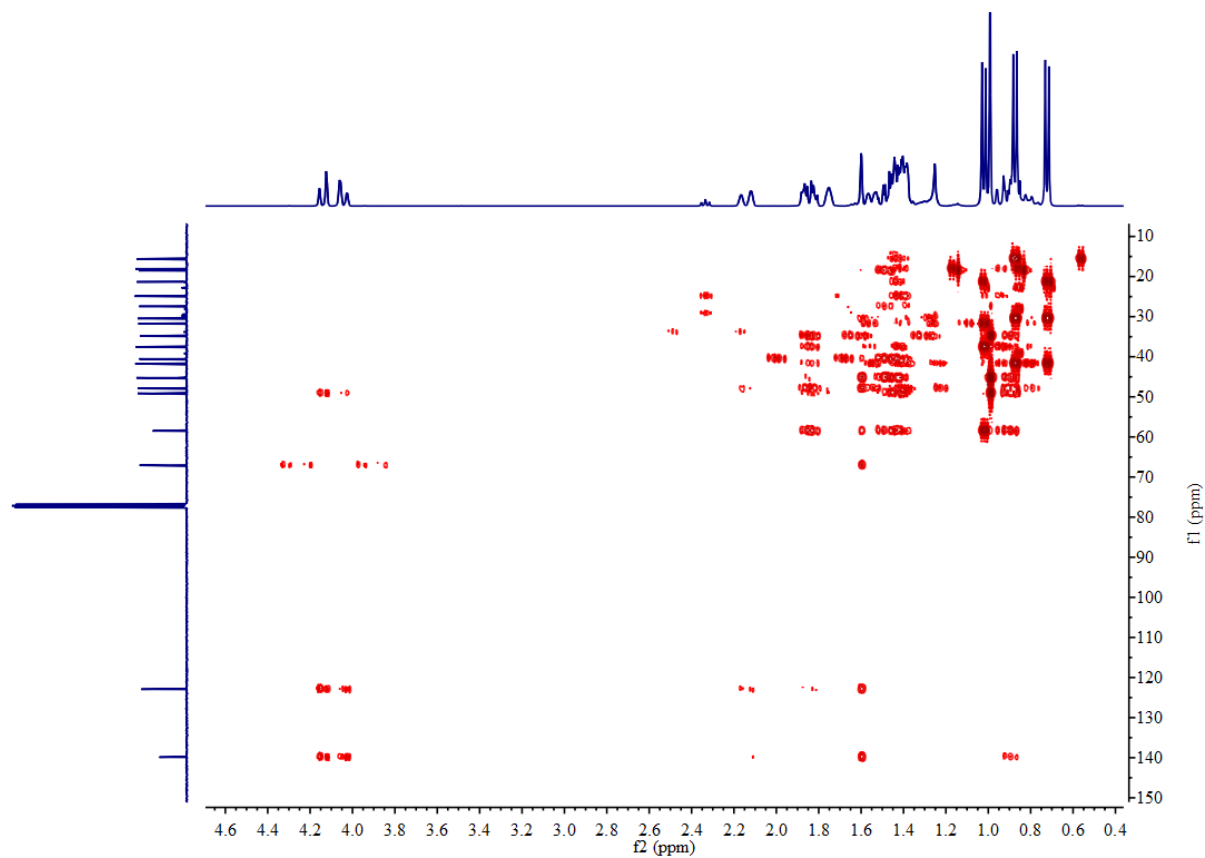

Figure S115 HMBC spectrum of **4a** in  $\text{CDCl}_3$  (400 MHz).

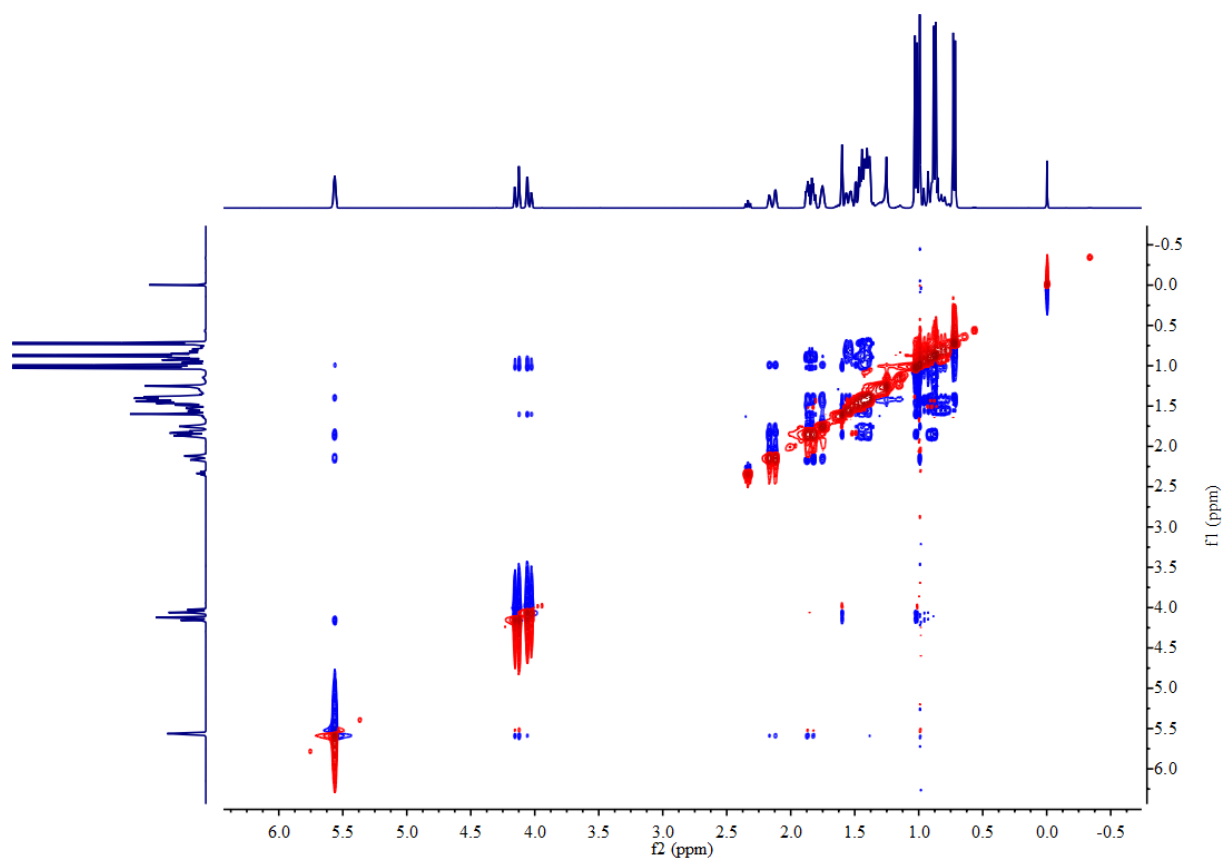

Figure S116 NOESY spectrum of **4a** in  $\text{CDCl}_3$  (400 MHz).

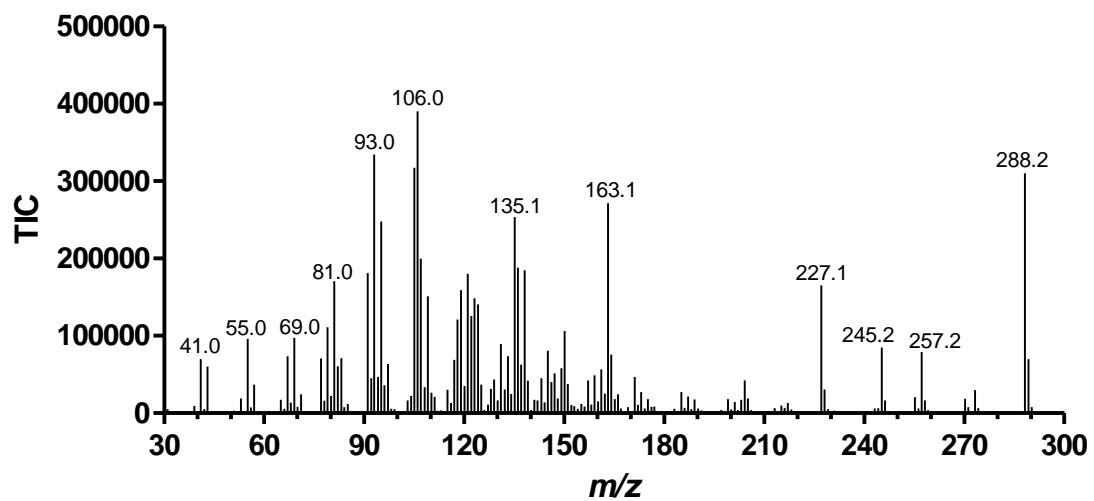

Figure S117 EI mass spectrum of **4a**.

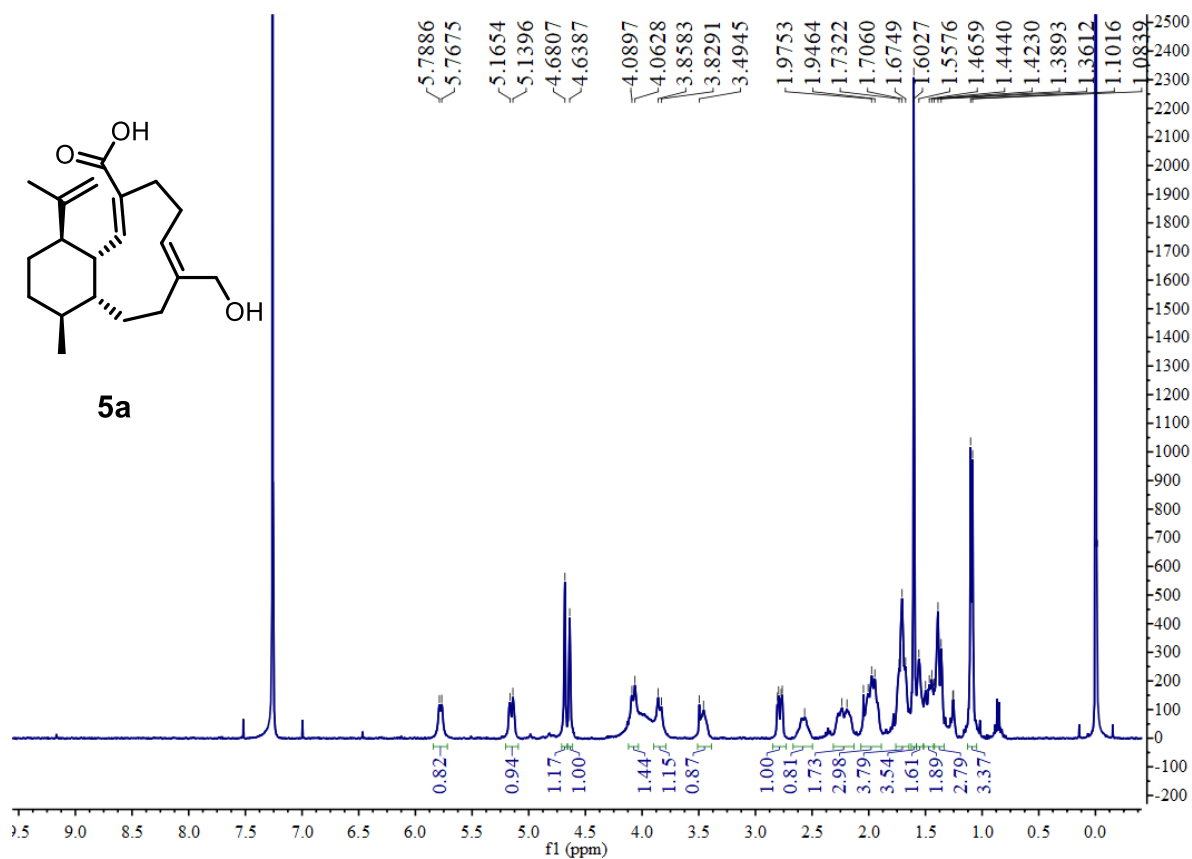

**Figure S118**  $^1\text{H}$  NMR spectrum of **5a** in  $\text{CDCl}_3$  (400 MHz).

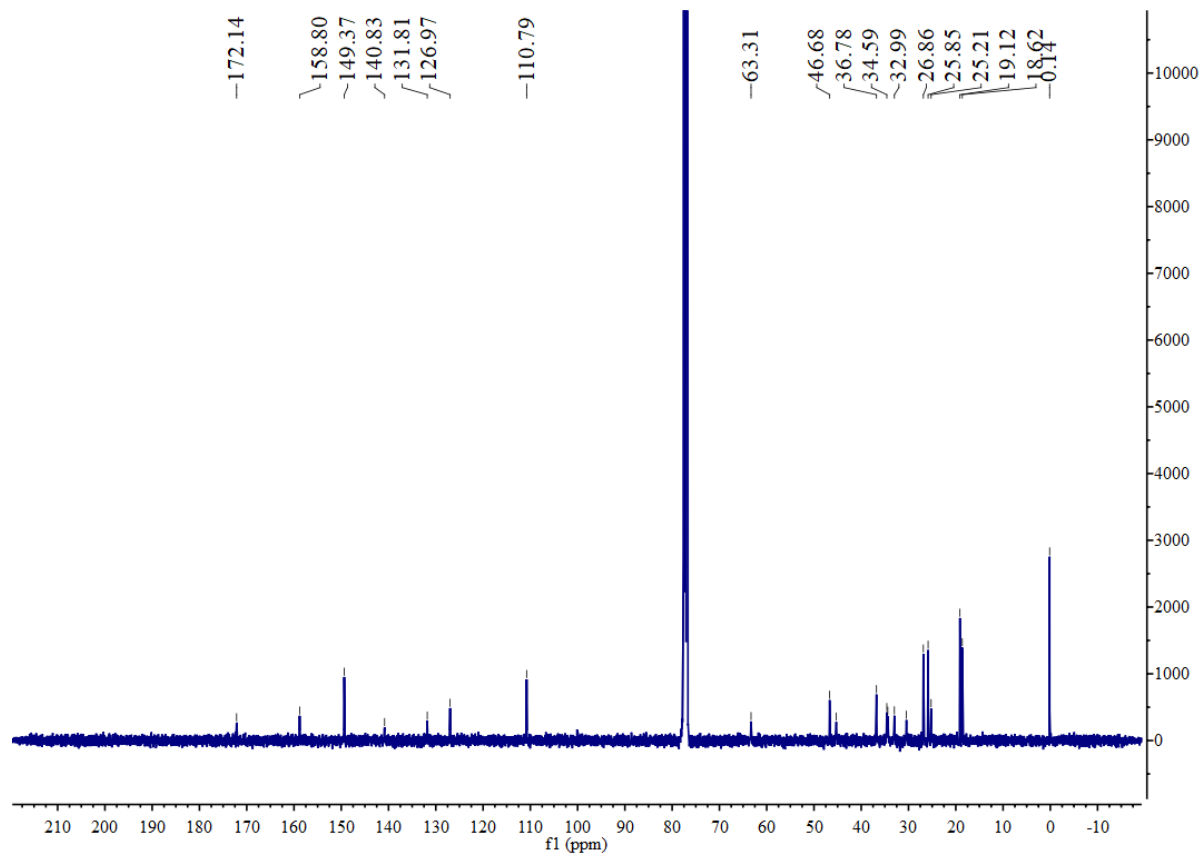

**Figure S119**  $^{13}\text{C}$  NMR spectrum of **5a** in  $\text{CDCl}_3$  (100 MHz).

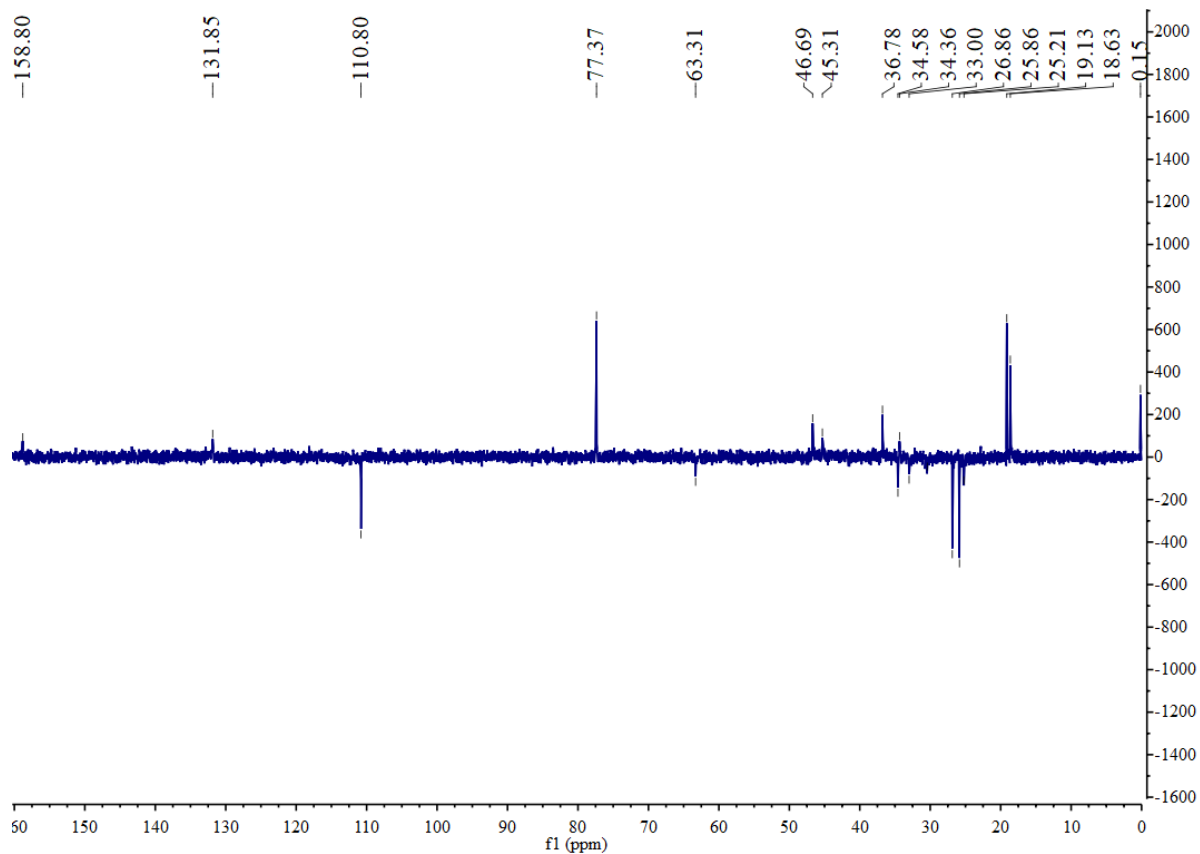

Figure S120 DEPT-135 NMR spectrum of **5a** in  $\text{CDCl}_3$  (100 MHz).

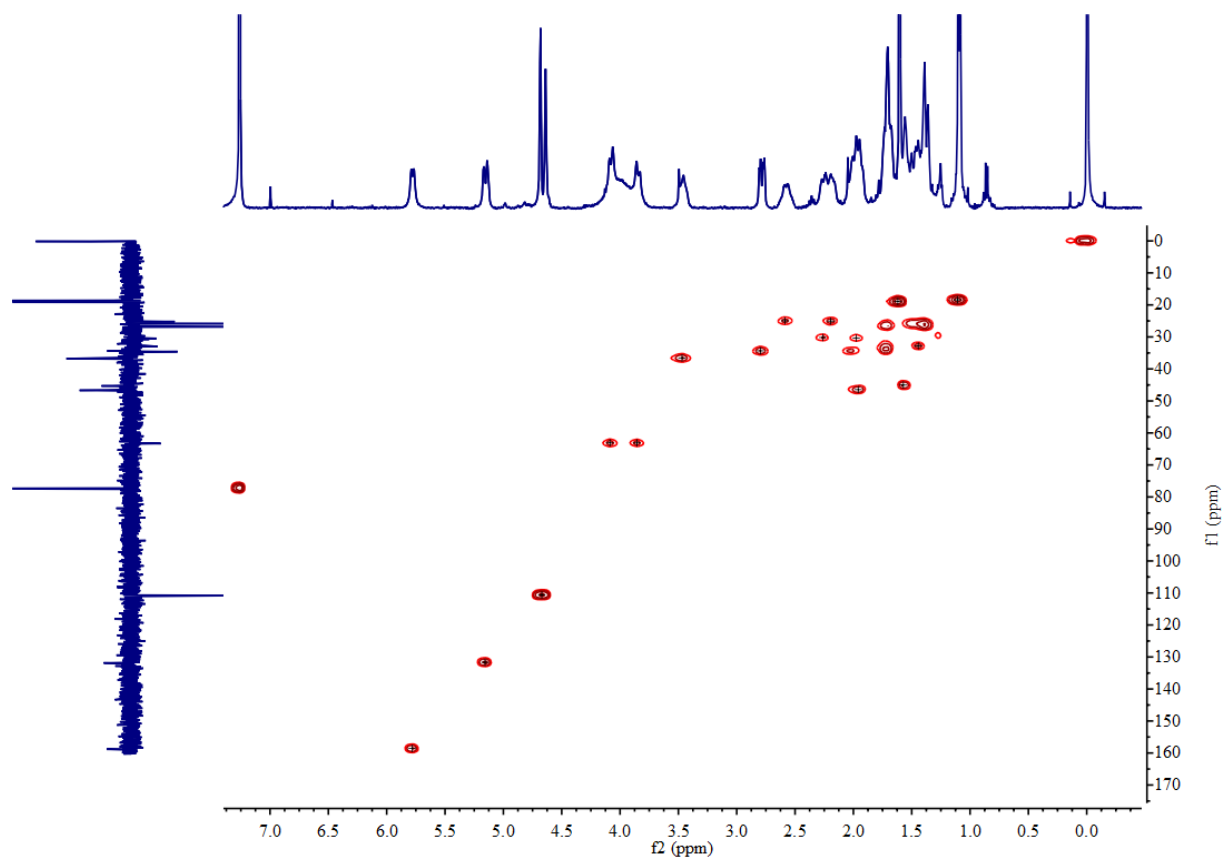

Figure S121 HSQC spectrum of **5a** in  $\text{CDCl}_3$  (400 MHz).

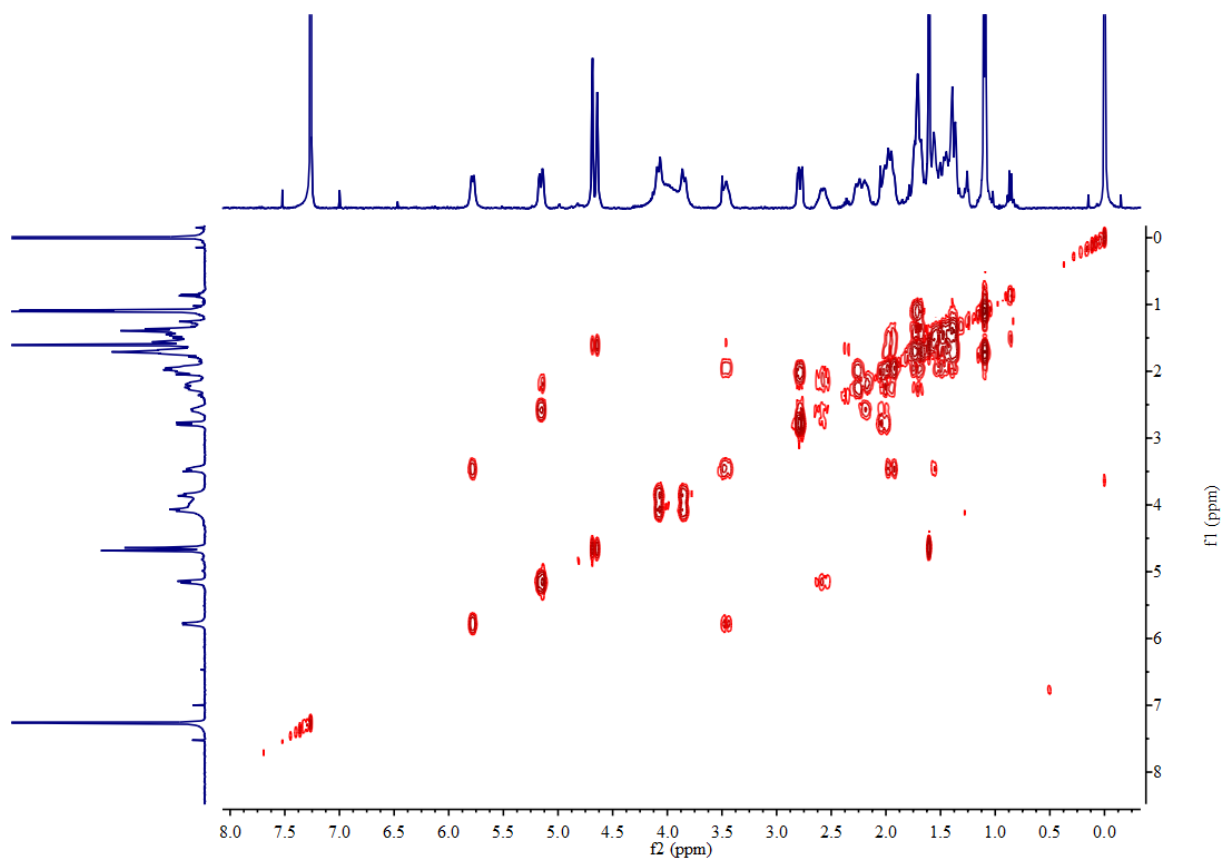

Figure S122  $^1\text{H}$ - $^1\text{H}$  COSY spectrum of **5a** in  $\text{CDCl}_3$  (400 MHz).

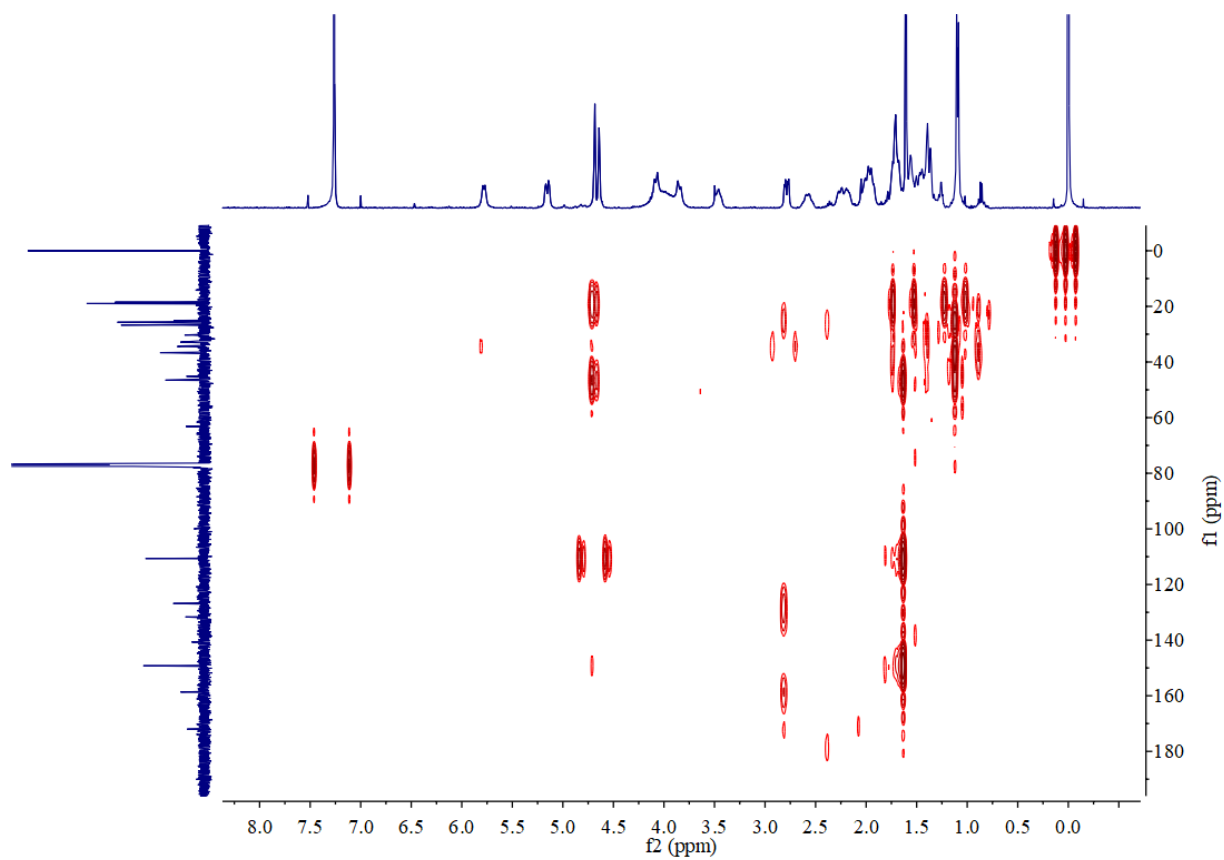

Figure S123 HMBC spectrum of **5a** in  $\text{CDCl}_3$  (400 MHz).

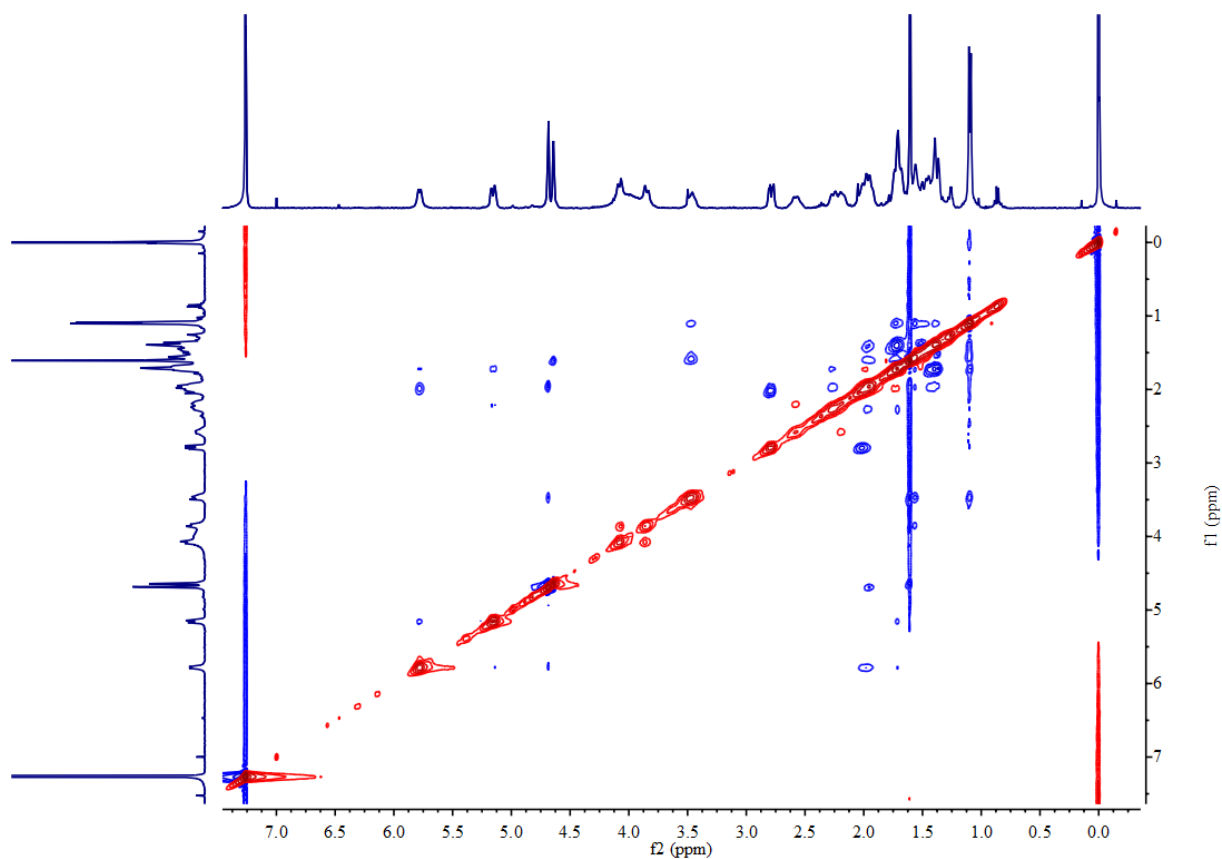

Figure S124 NOESY spectrum of **5a** in  $\text{CDCl}_3$  (400 MHz).

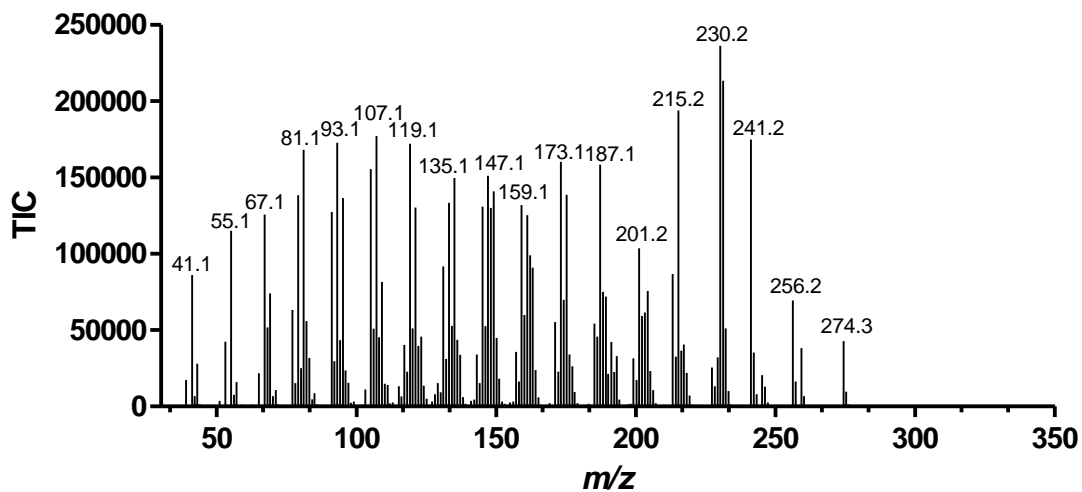

Figure S125 EI mass spectrum of **5a**.

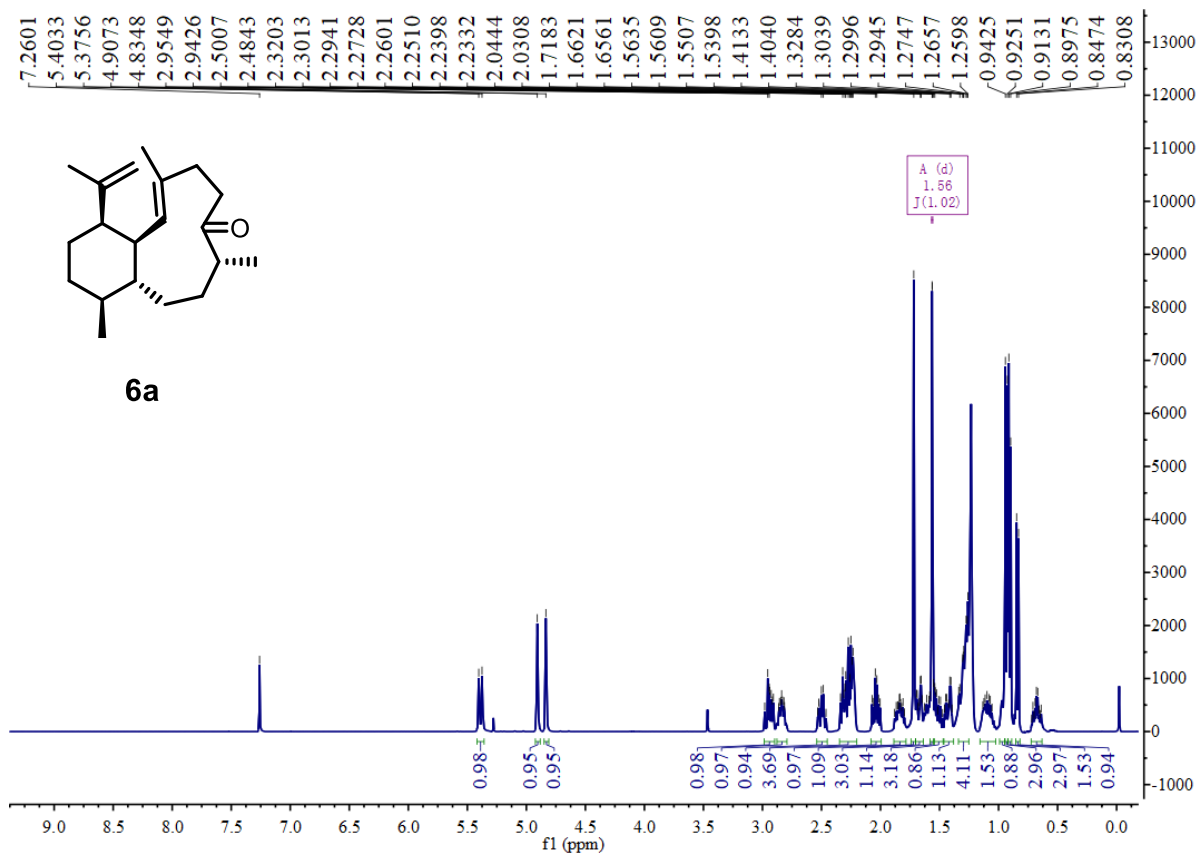

**Figure S126**  $^1\text{H}$  NMR spectrum of **6a** in  $\text{CDCl}_3$  (400 MHz).

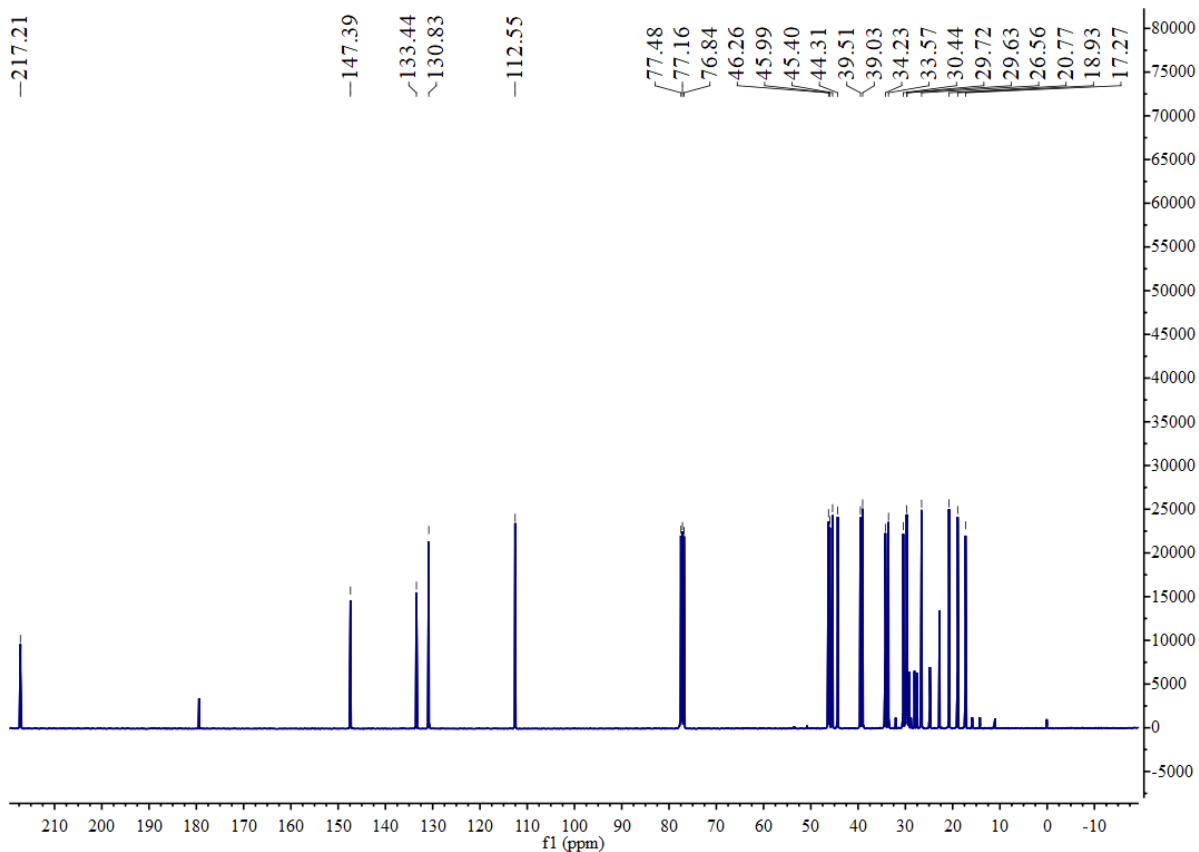

**Figure S127**  $^{13}\text{C}$  NMR spectrum of **6a** in  $\text{CDCl}_3$  (100 MHz).



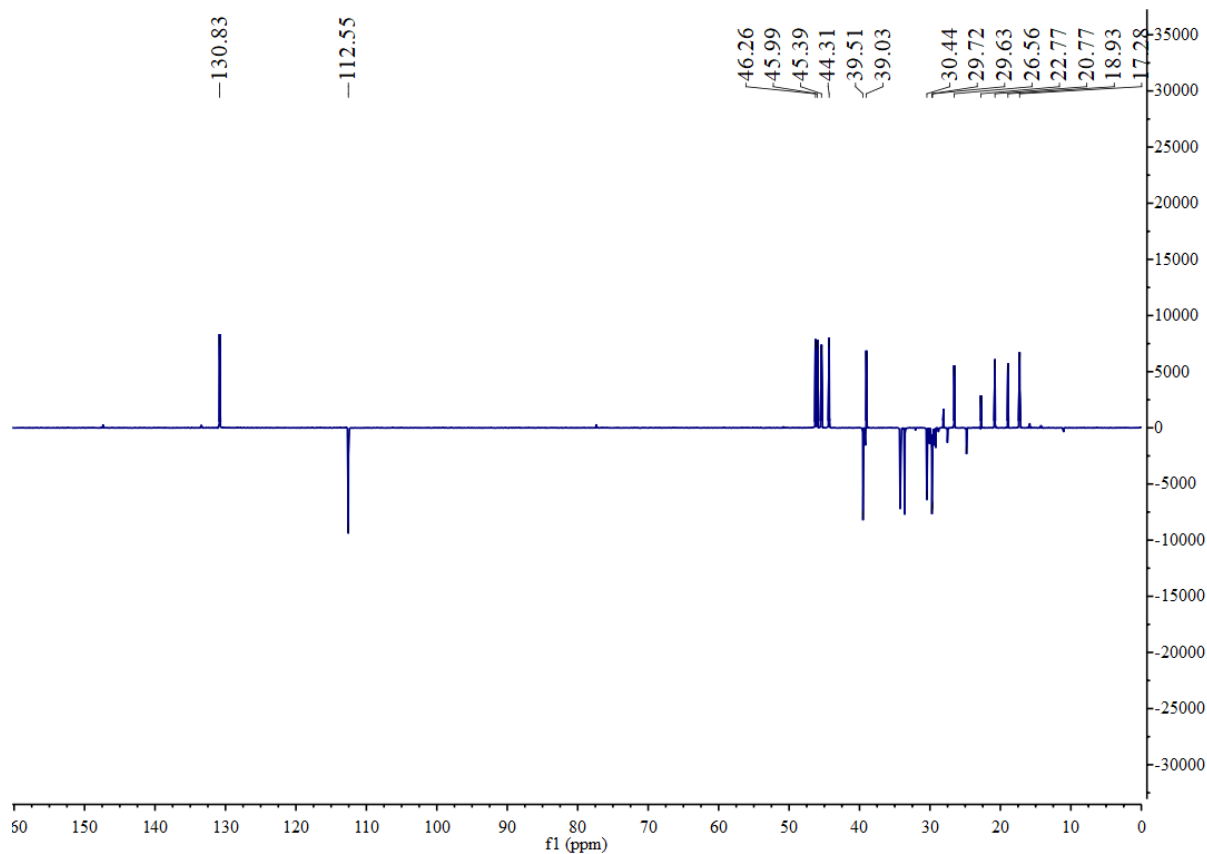

Figure S128 DEPT-135 NMR spectrum of **6a** in  $\text{CDCl}_3$  (100 MHz).

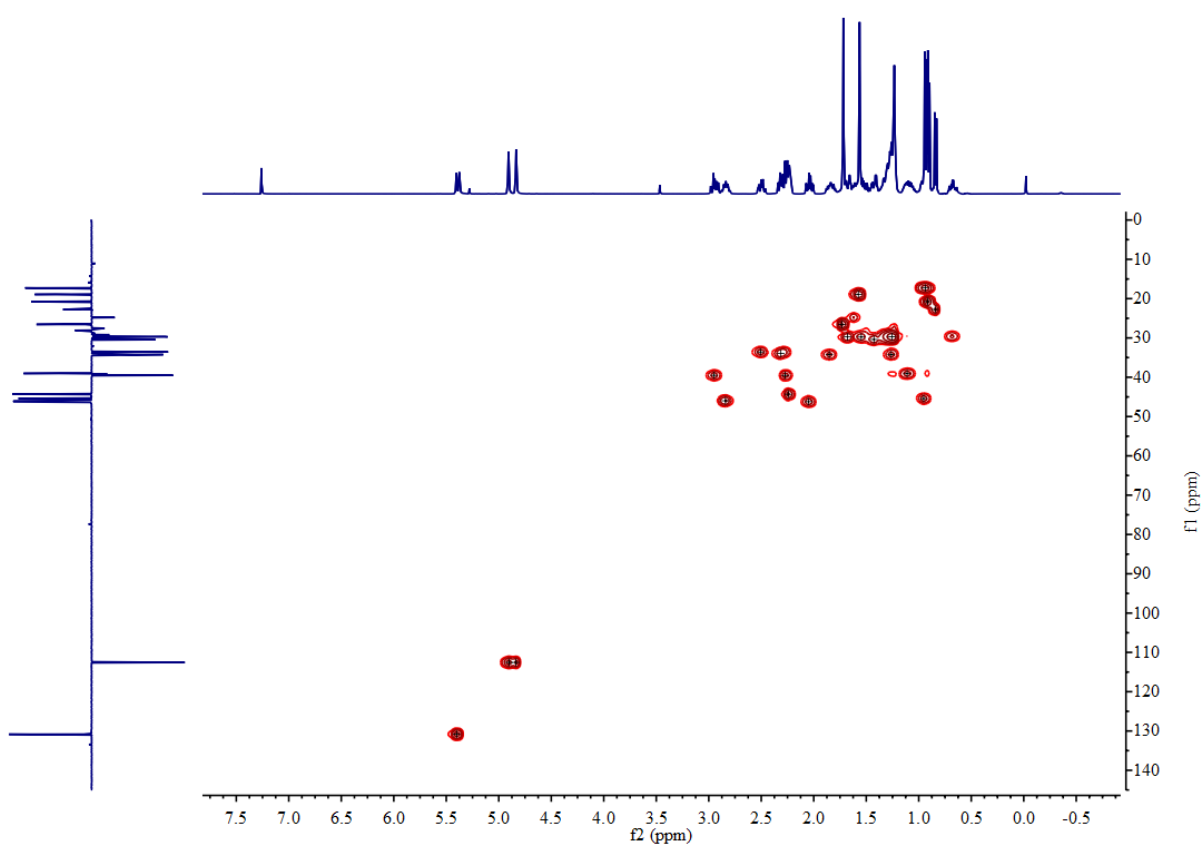

Figure S129 HSQC spectrum of **6a** in  $\text{CDCl}_3$  (400 MHz).

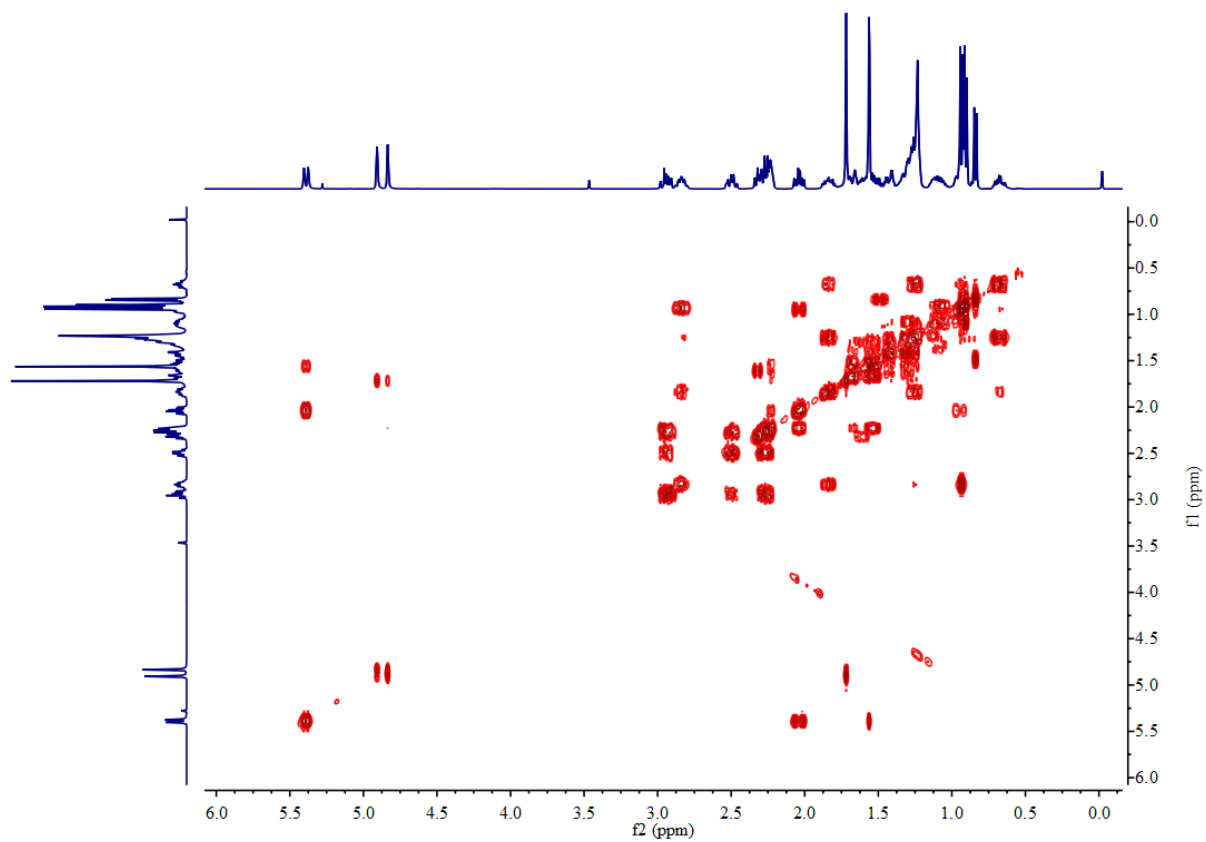

Figure S130  $^1\text{H}$ - $^1\text{H}$  COSY spectrum of **6a** in  $\text{CDCl}_3$  (400 MHz).

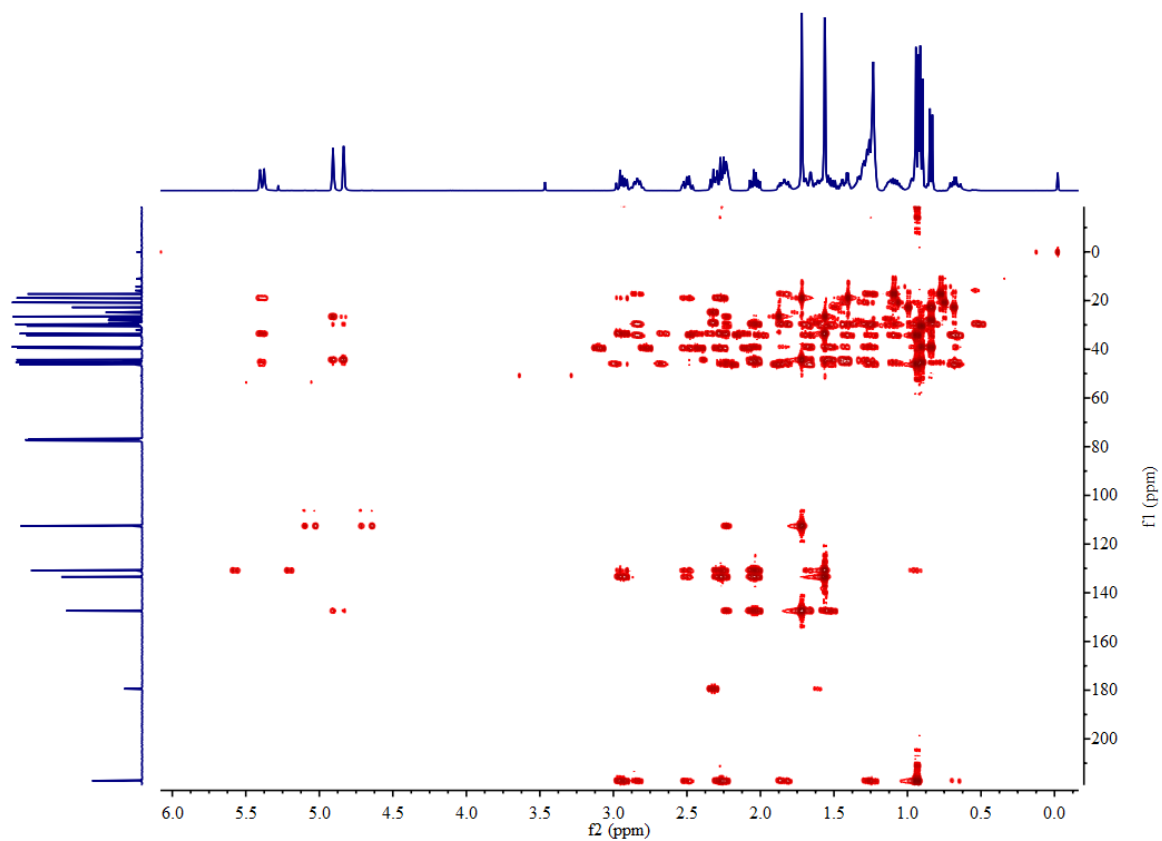

Figure S131 HMBC spectrum of **6a** in  $\text{CDCl}_3$  (400 MHz).

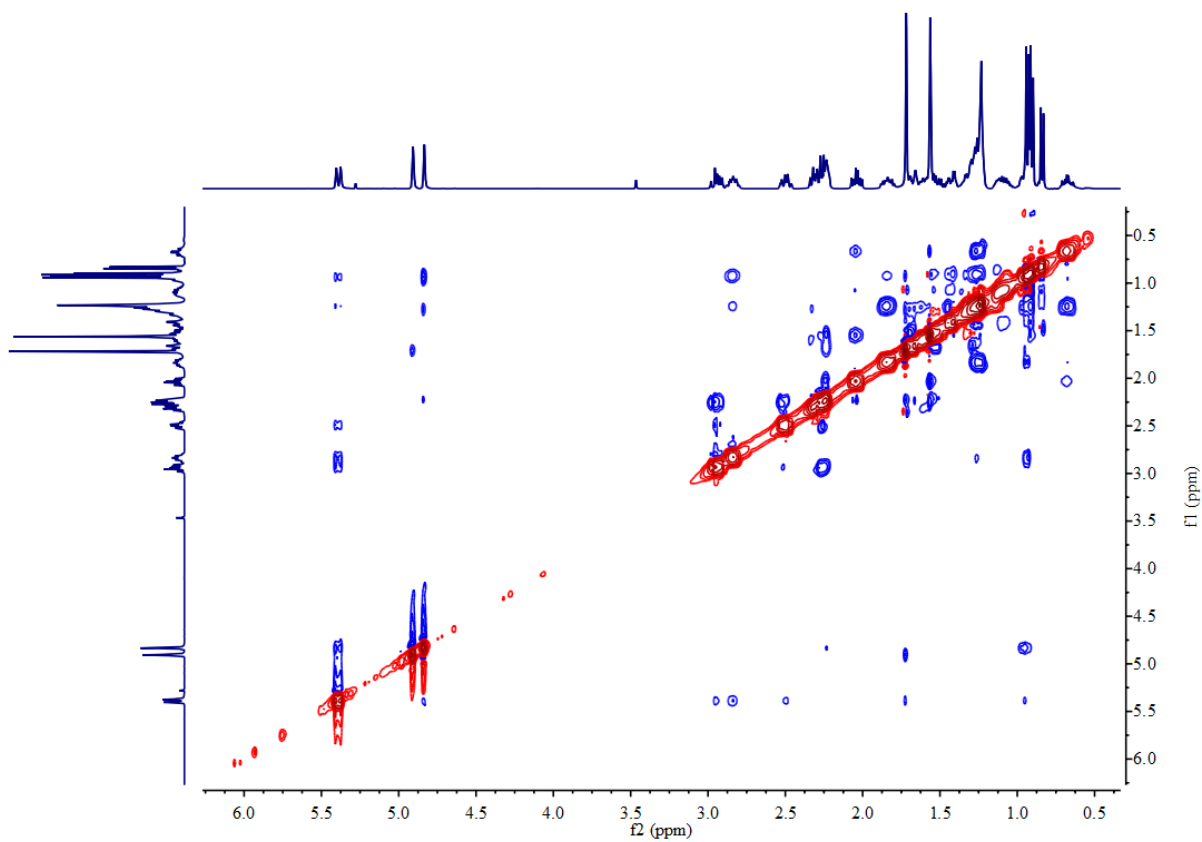

Figure S132 NOESY spectrum of **6a** in CDCl<sub>3</sub> (400 MHz).

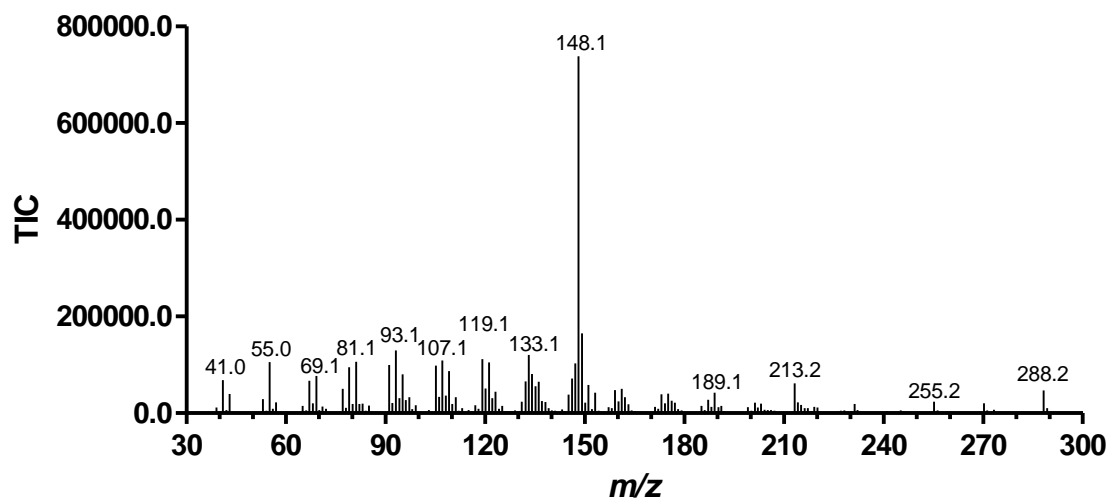

Figure S133 EI mass spectrum of **6a**.

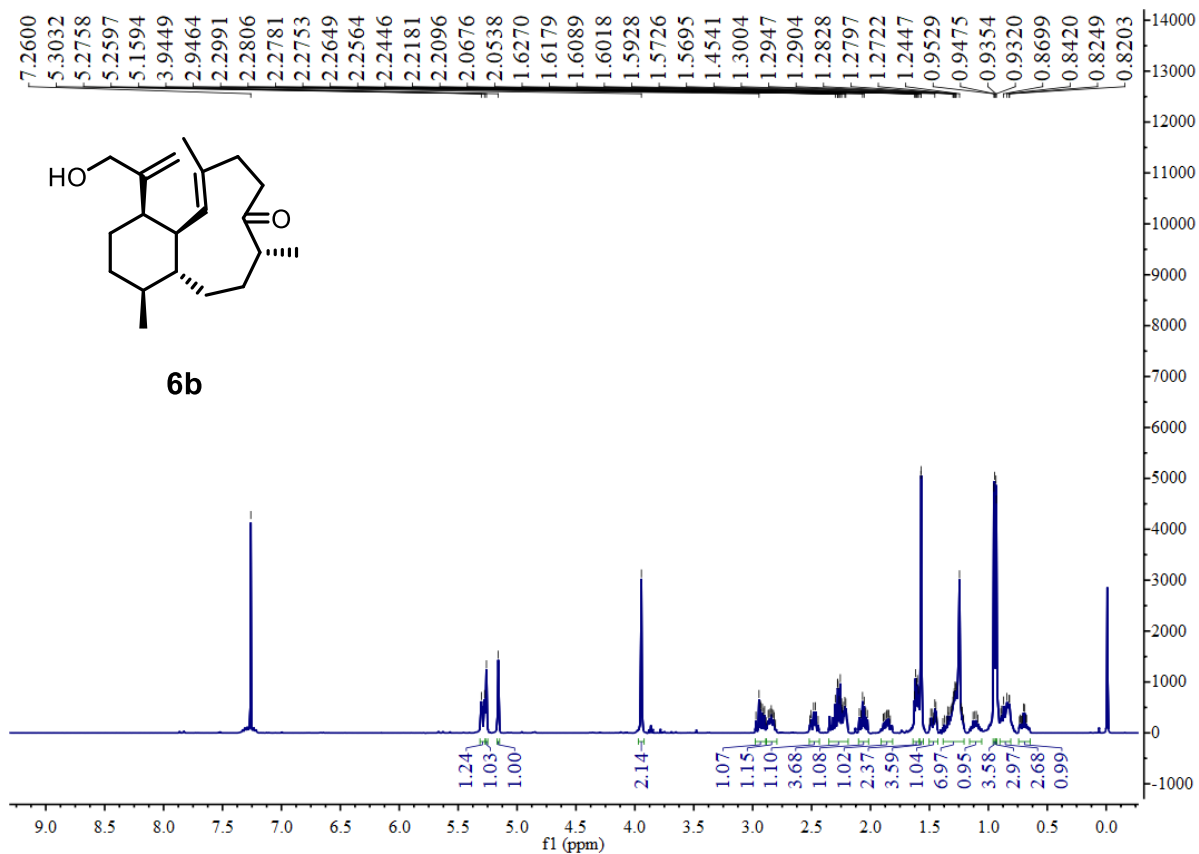

**Figure S134**  $^1\text{H}$  NMR spectrum of **6b** in  $\text{CDCl}_3$  (400 MHz).

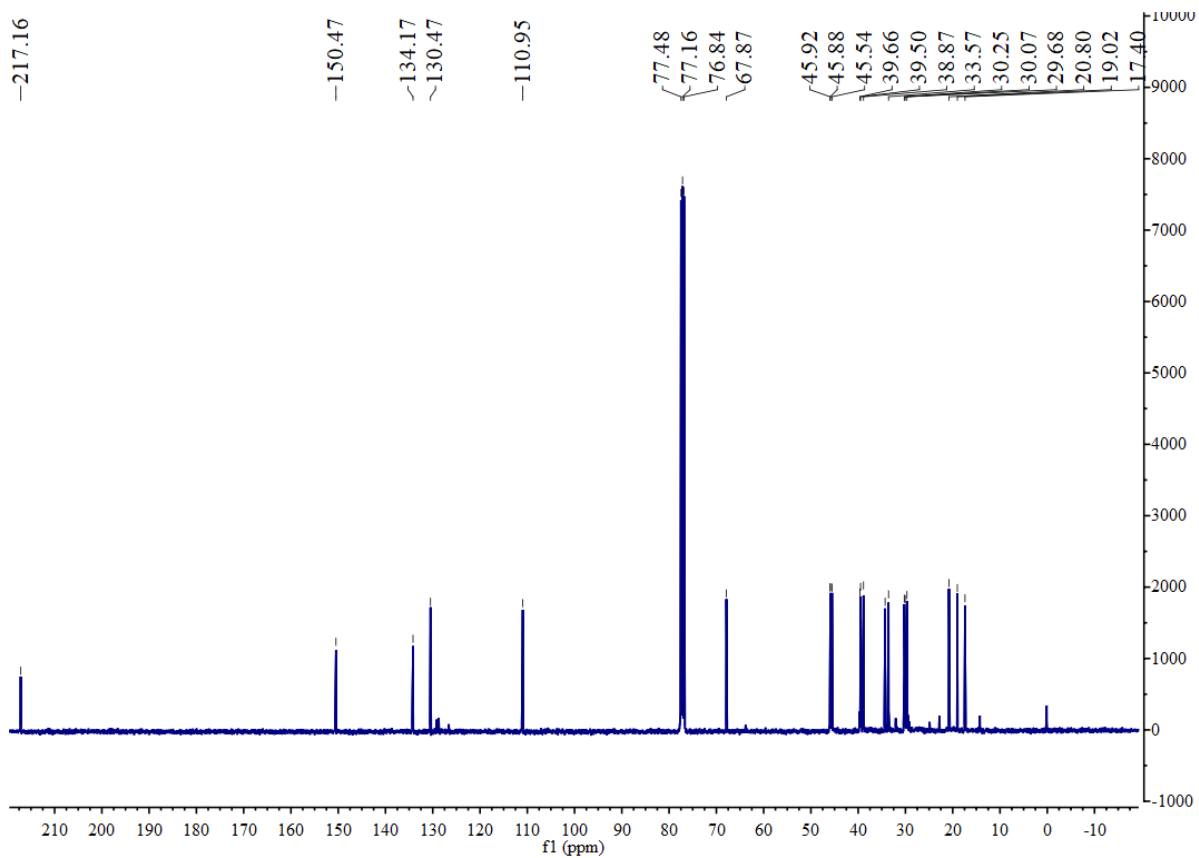

**Figure S135**  $^{13}\text{C}$  NMR spectrum of **6b** in  $\text{CDCl}_3$  (100 MHz).

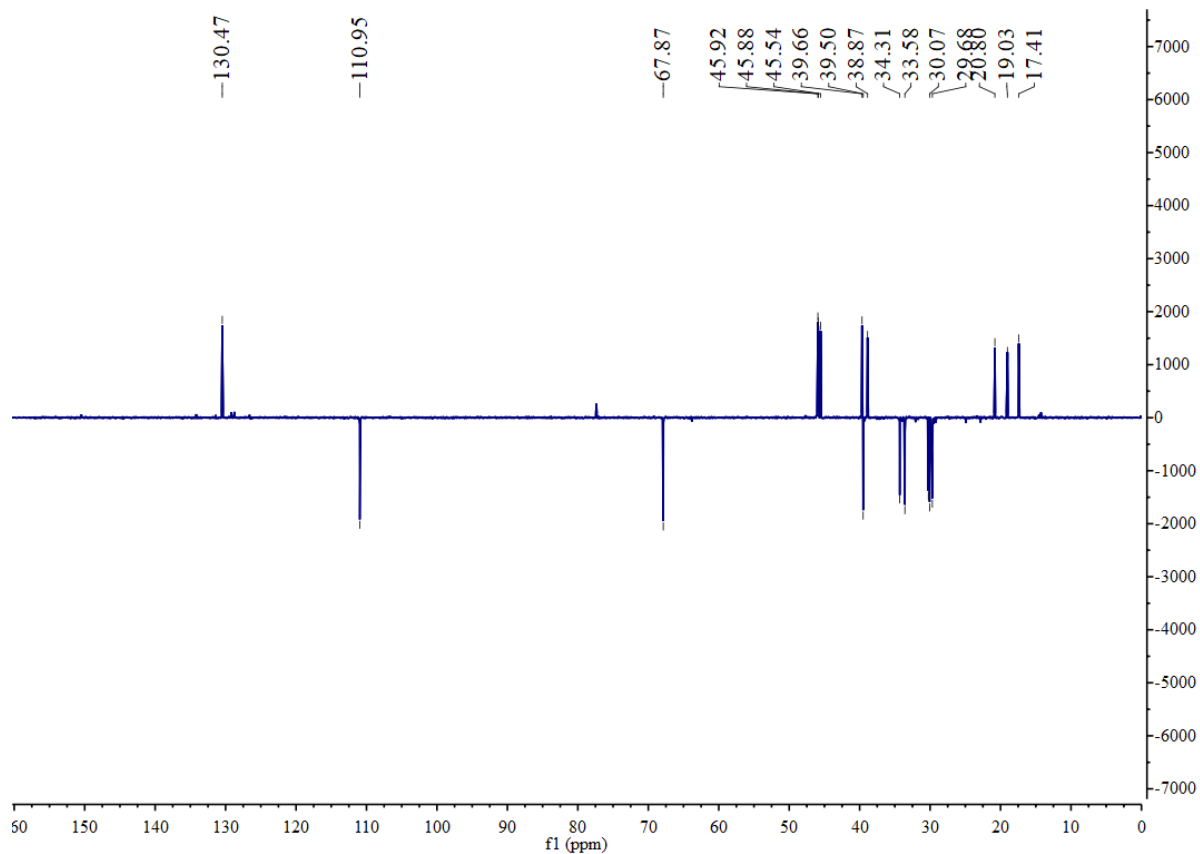

Figure S136 DEPT-135 NMR spectrum of **6b** in  $\text{CDCl}_3$  (100 MHz).

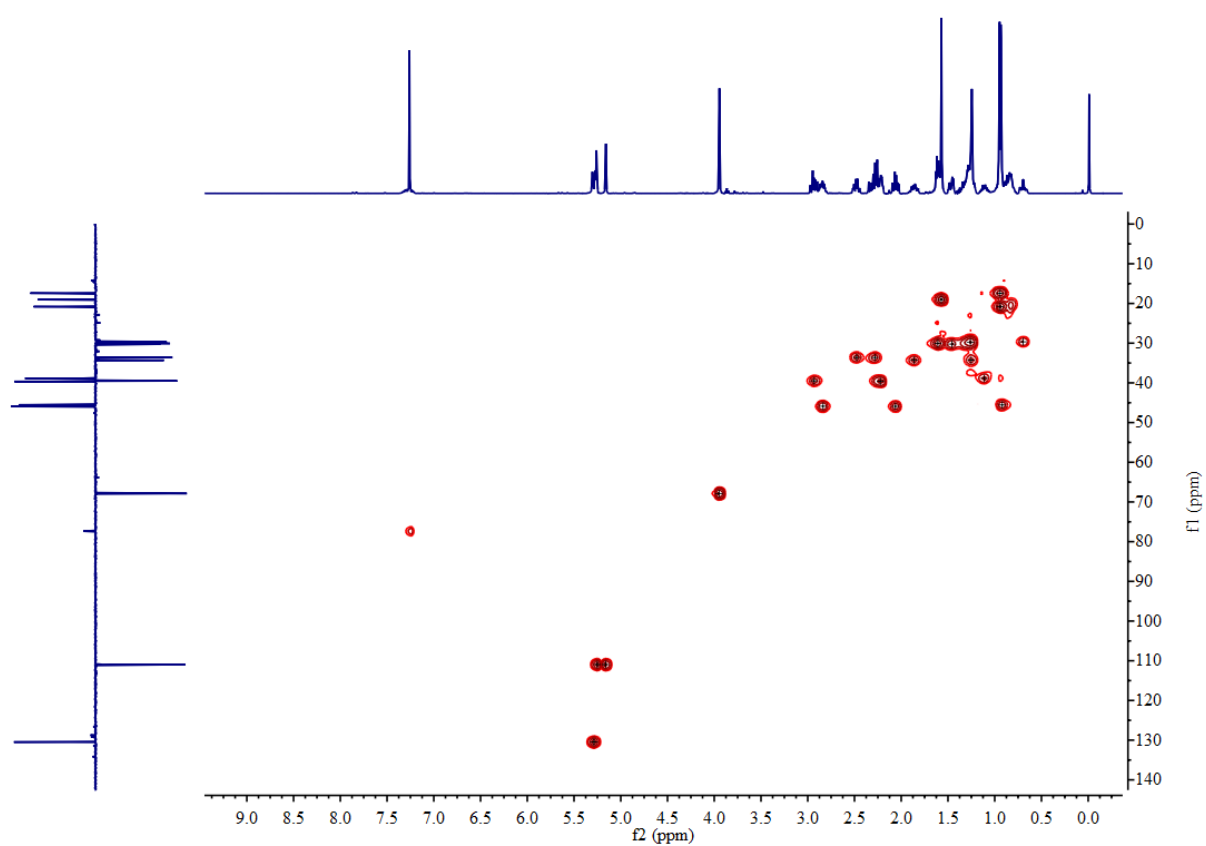

Figure S137 HSQC spectrum of **6b** in  $\text{CDCl}_3$  (400 MHz).

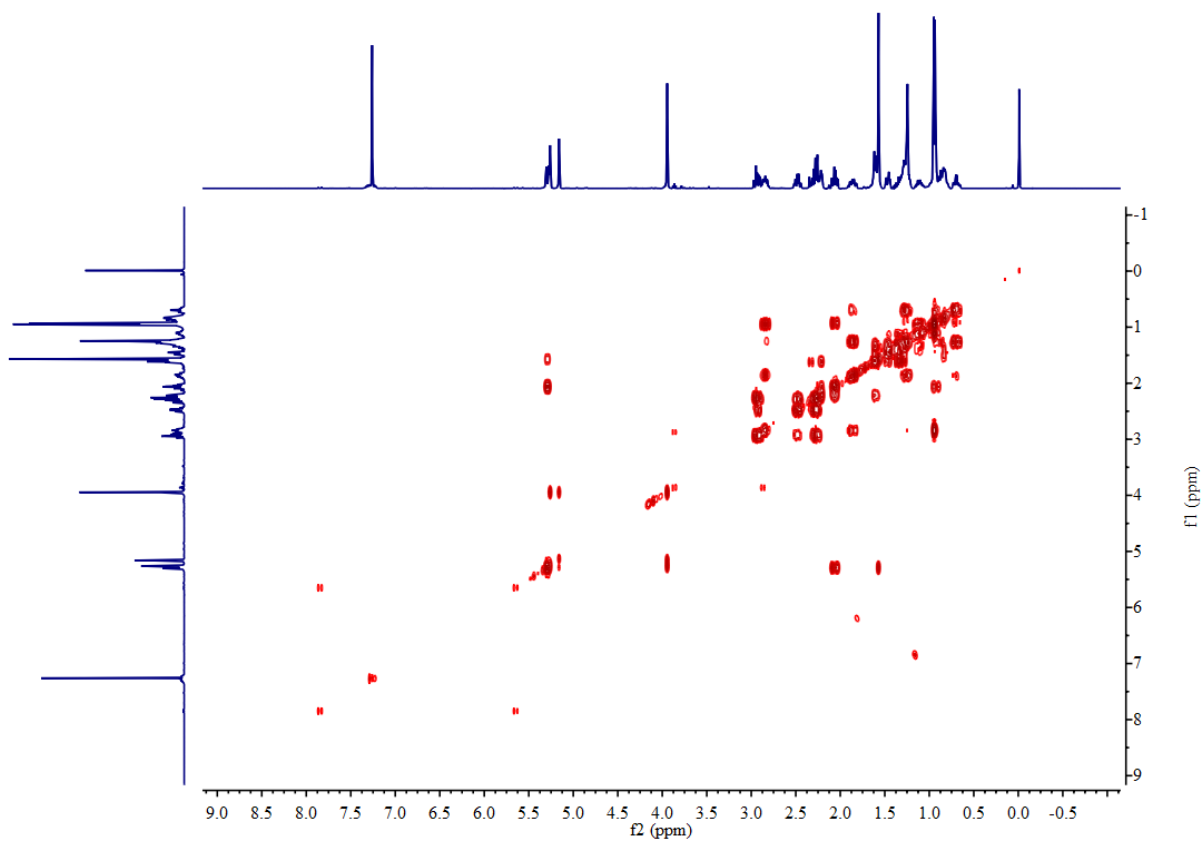

Figure S138  $^1\text{H}$ - $^1\text{H}$  COSY spectrum of **6b** in  $\text{CDCl}_3$  (400 MHz).

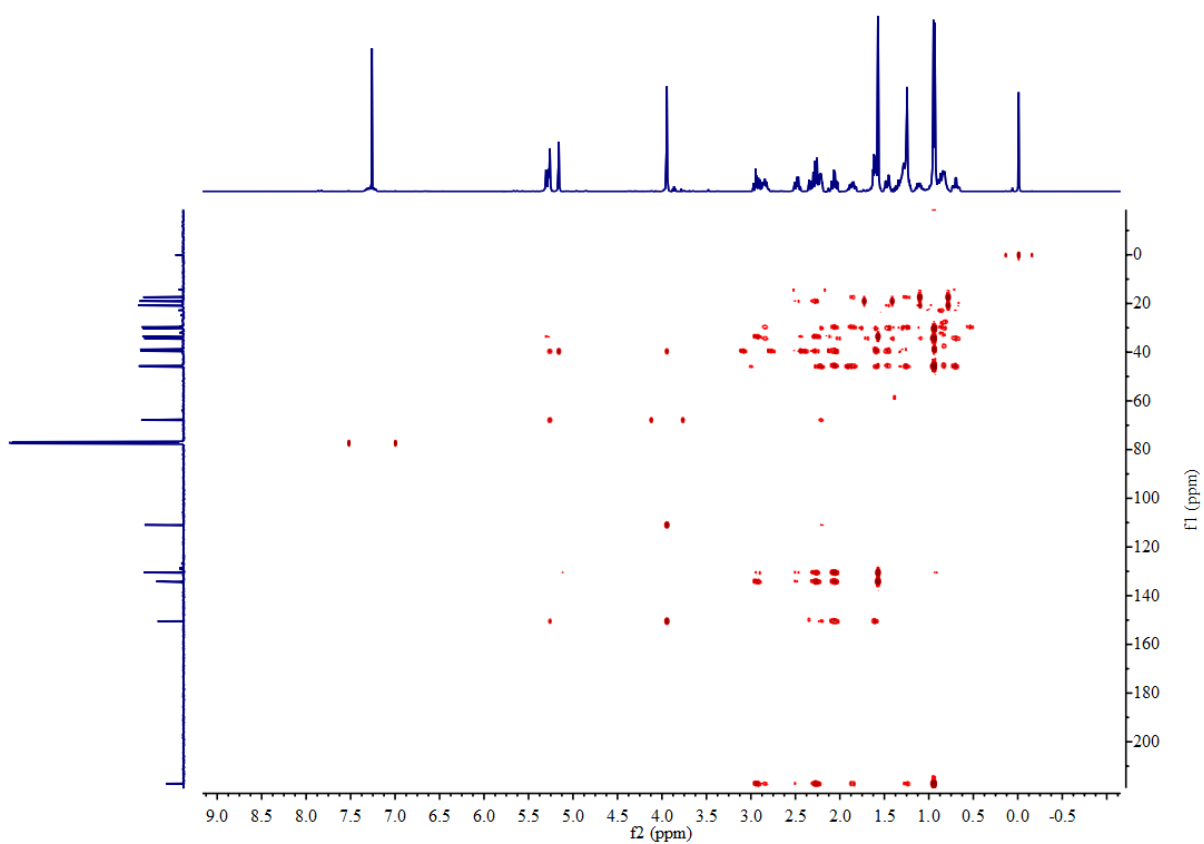

Figure S139 HMBC spectrum of **6b** in  $\text{CDCl}_3$  (400 MHz).

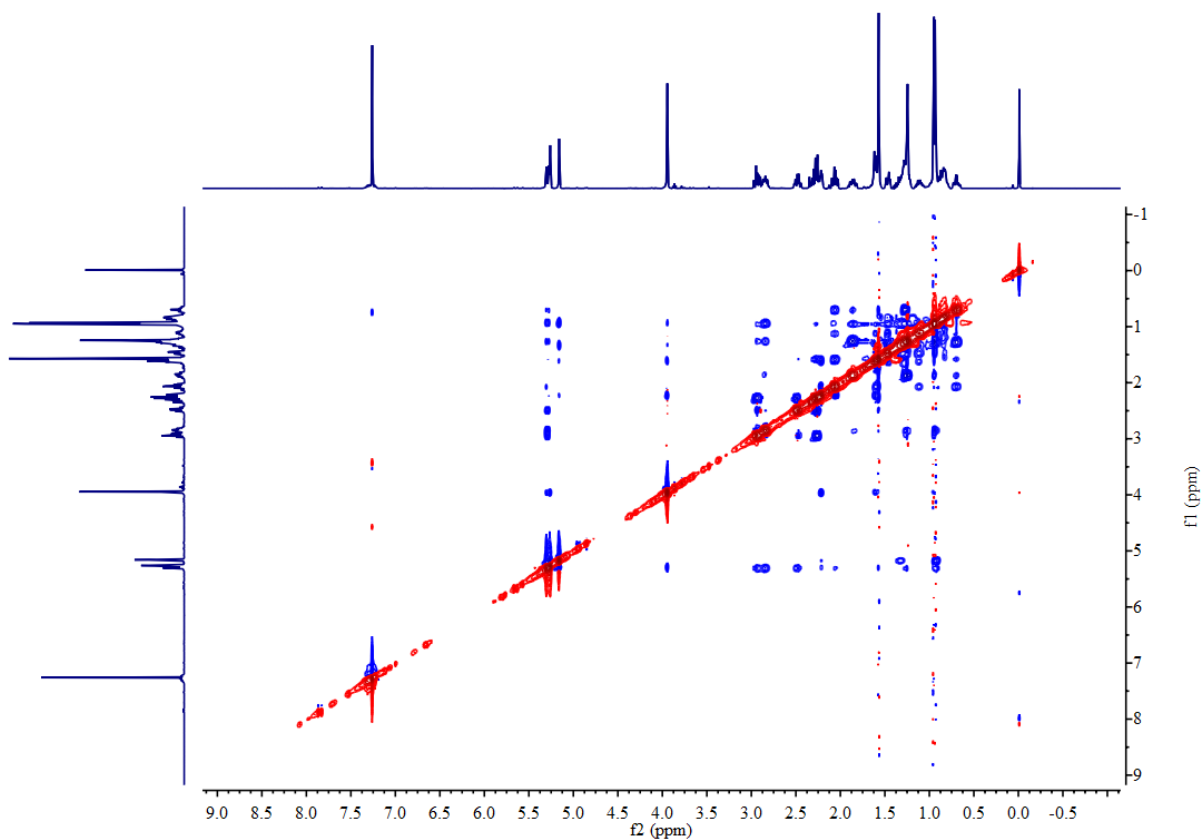

Figure S140 NOESY spectrum of **6b** in  $CDCl_3$  (400 MHz).

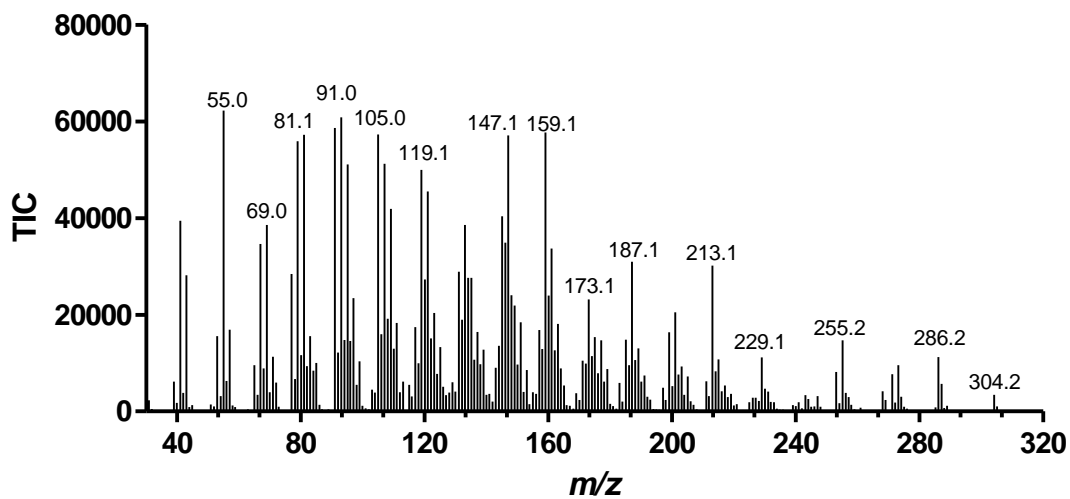

Figure S141 EI mass spectrum of **6b**.

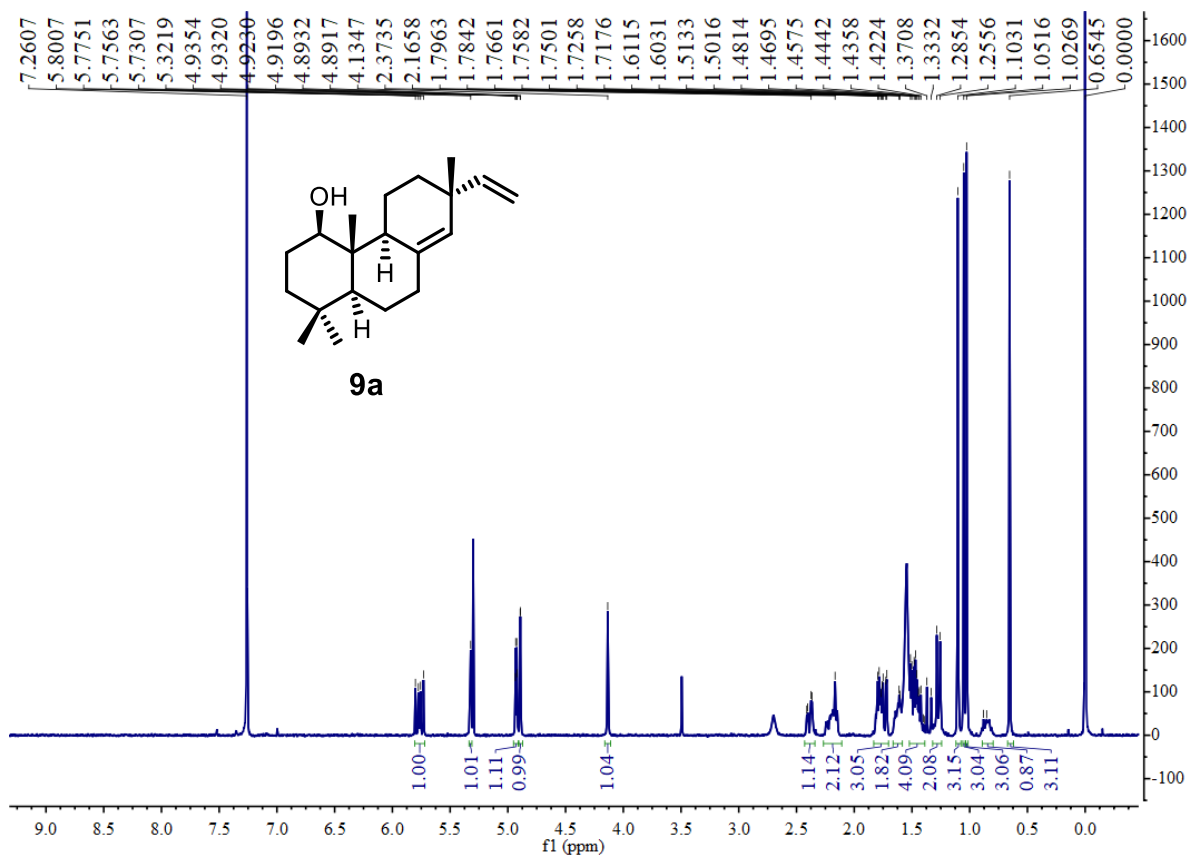

**Figure S142**  $^1\text{H}$  NMR spectrum of **9a** in  $\text{CDCl}_3$  (400 MHz).

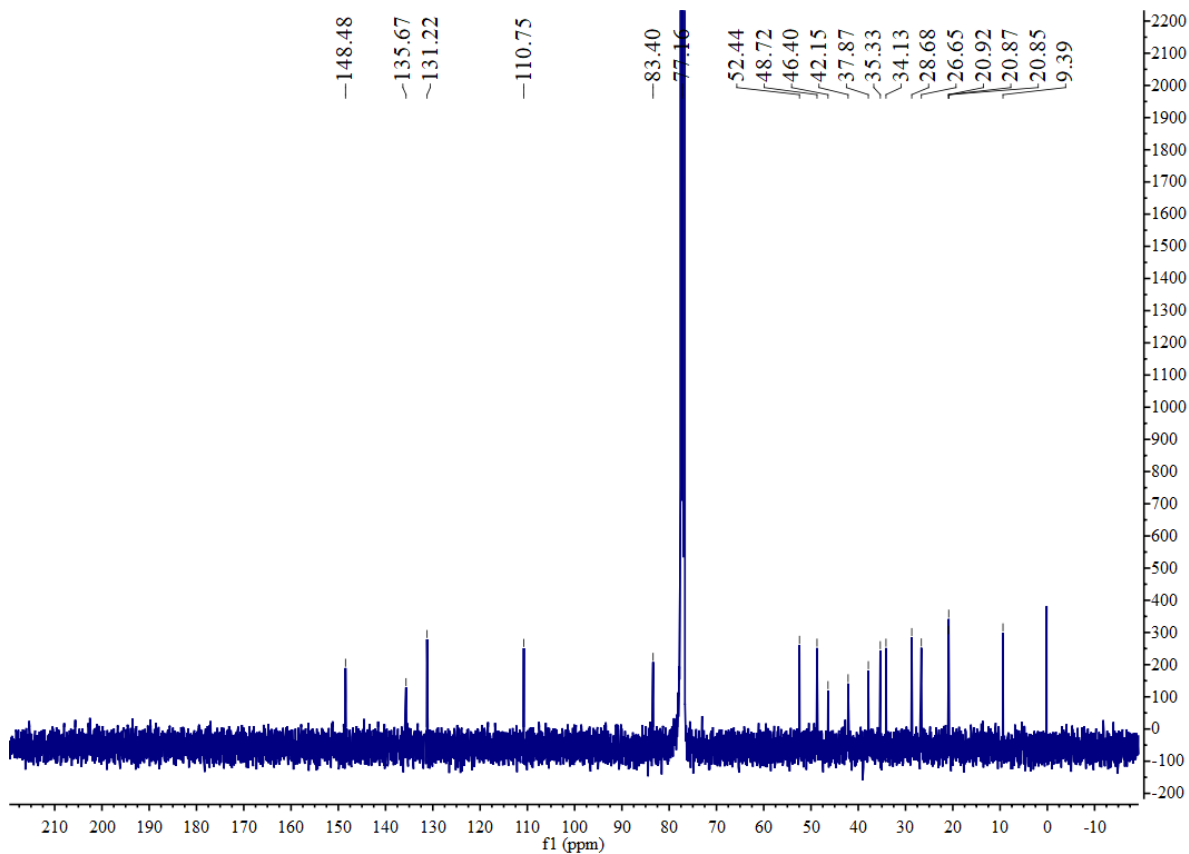

**Figure S143**  $^{13}\text{C}$  NMR spectrum of **9a** in  $\text{CDCl}_3$  (100 MHz).



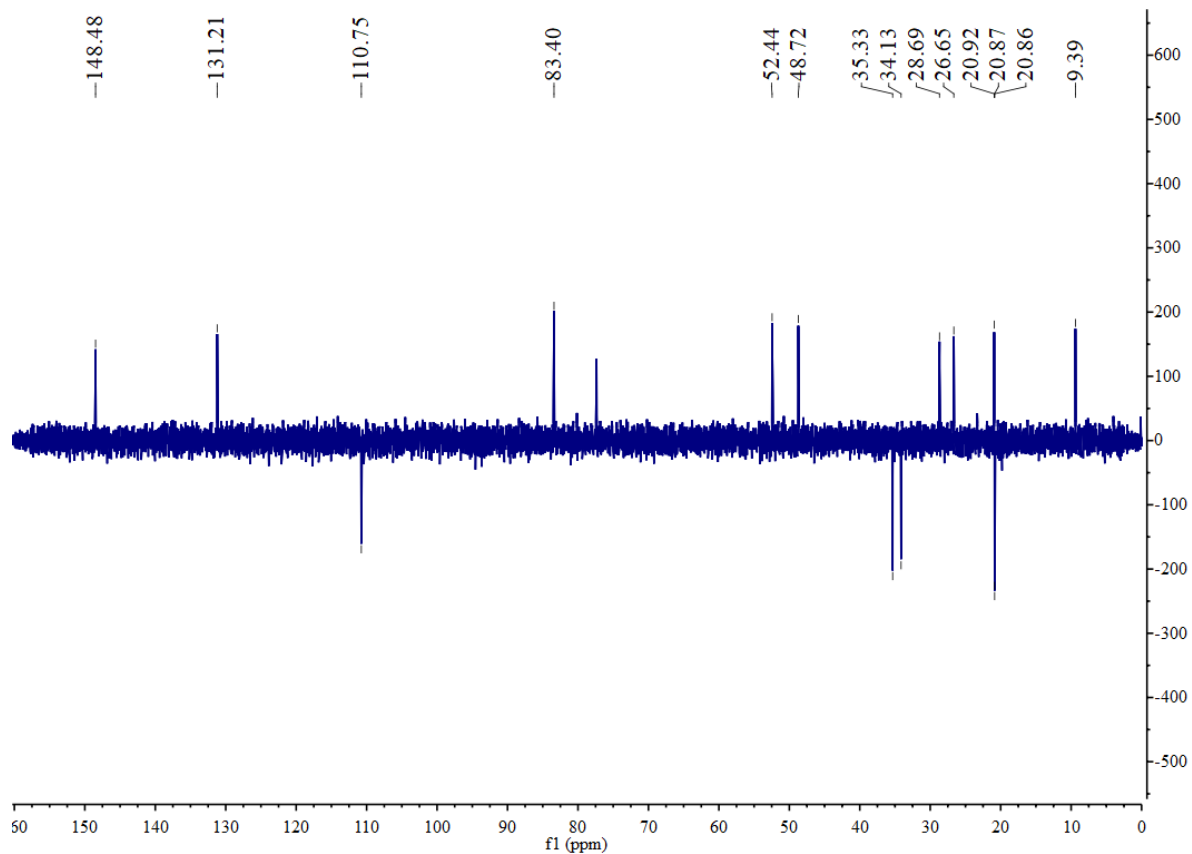

Figure S144 DEPT-135 NMR spectrum of **9a** in CDCl<sub>3</sub> (100 MHz).

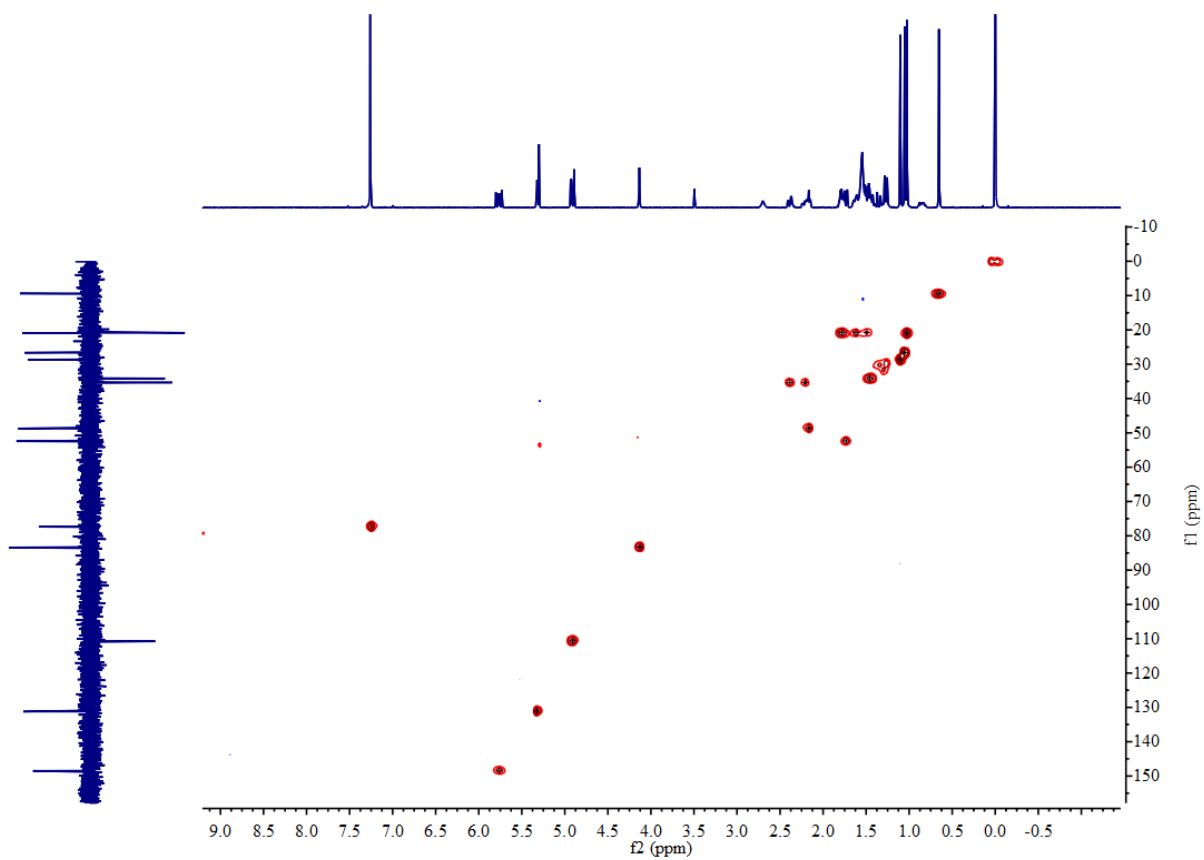

Figure S144 HSQC spectrum of **9a** in CDCl<sub>3</sub> (400 MHz).

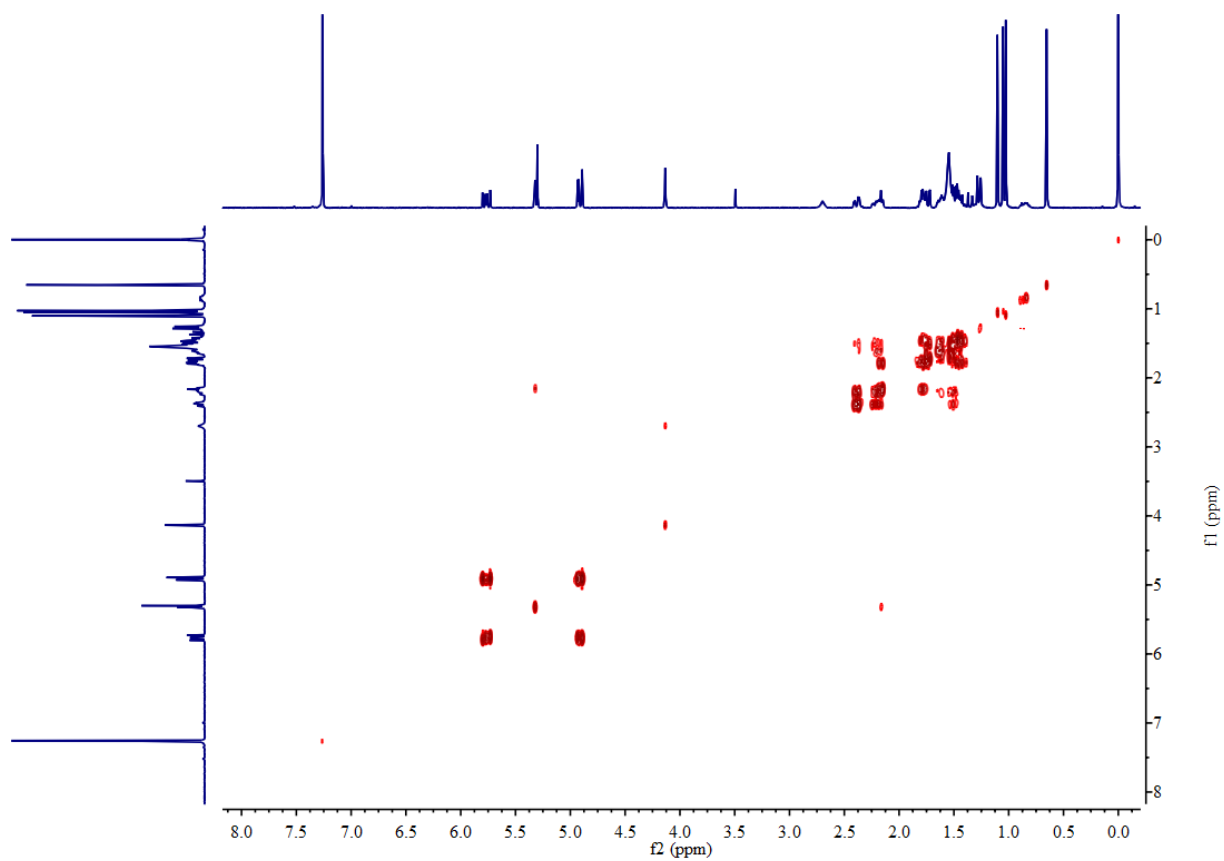

Figure S145  $^1\text{H}$ - $^1\text{H}$  COSY spectrum of **9a** in  $\text{CDCl}_3$  (400 MHz).

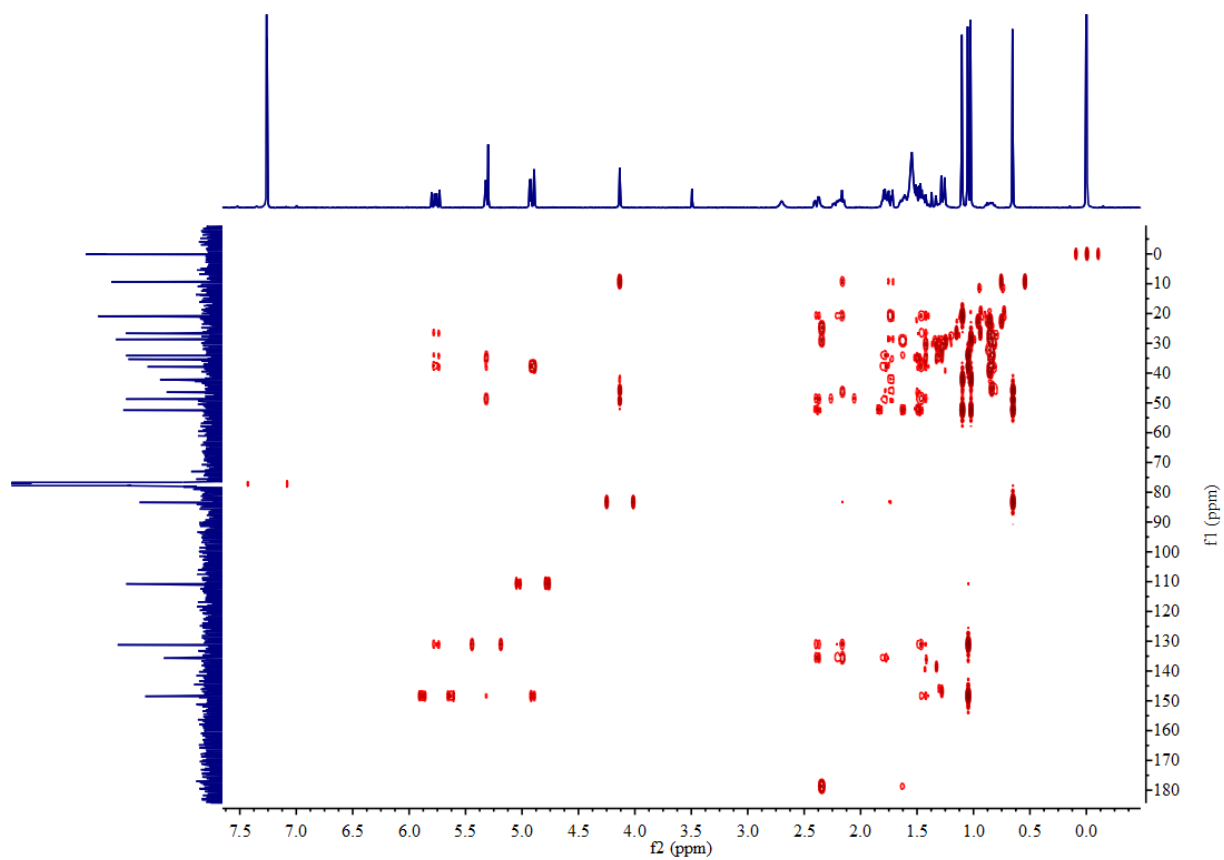

Figure S147 HMBC spectrum of **9a** in  $\text{CDCl}_3$  (400 MHz).

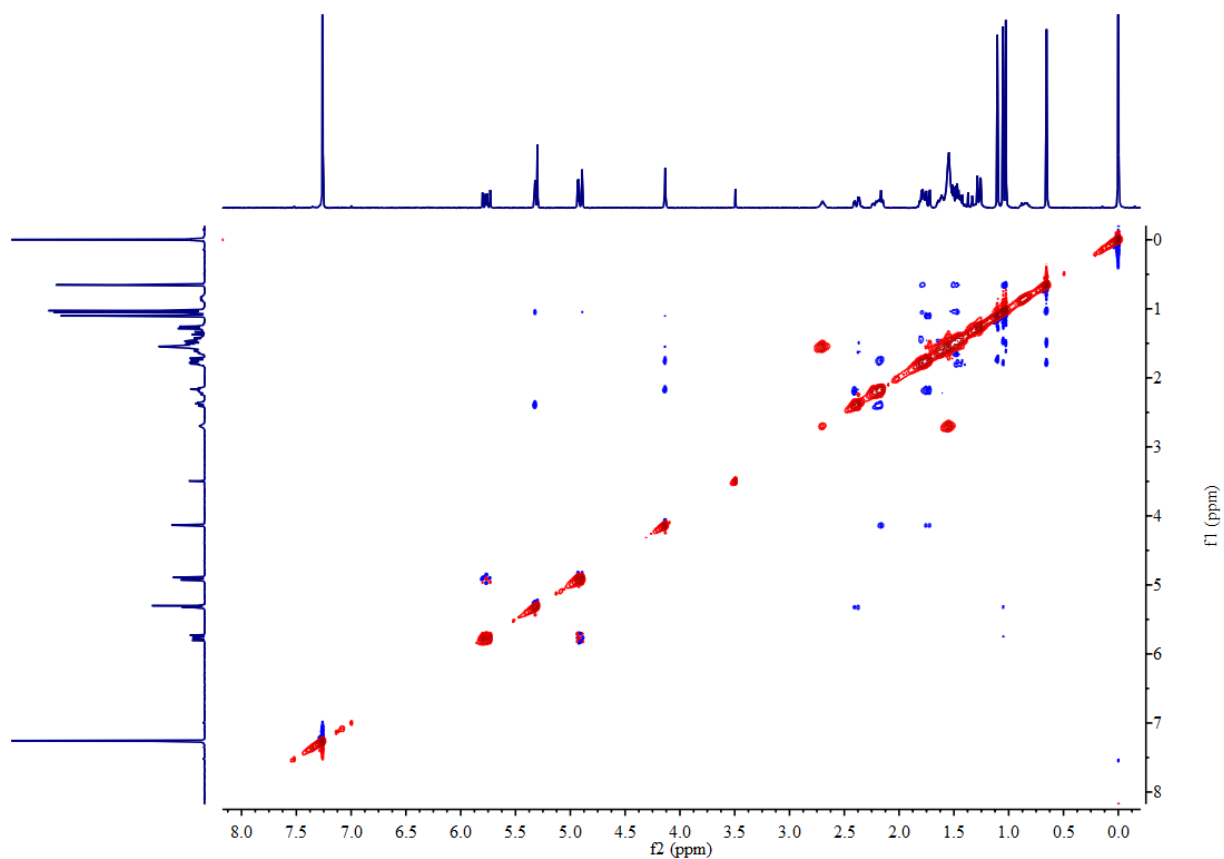

Figure S148 NOESY spectrum of **9a** in CDCl<sub>3</sub> (400 MHz).

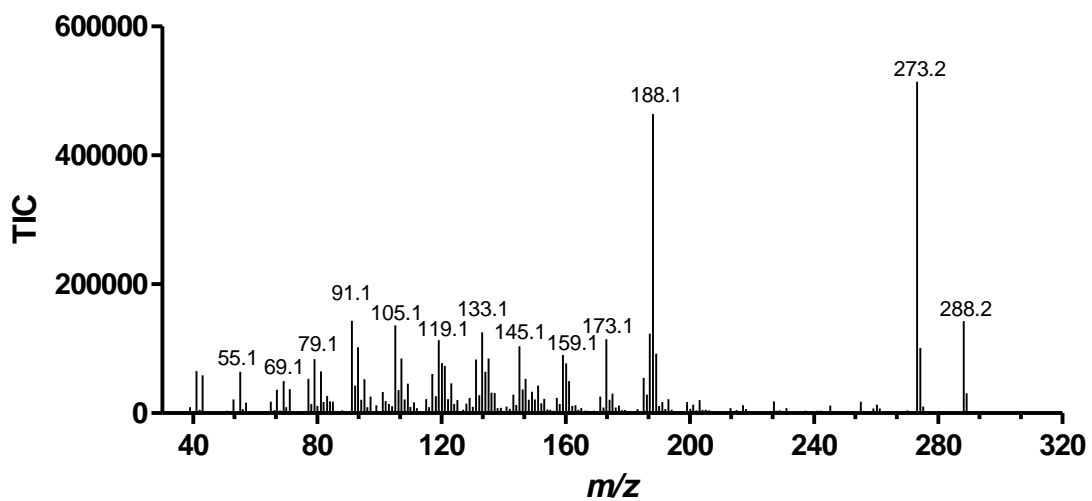

Figure S149 EI mass spectrum of **9a**.

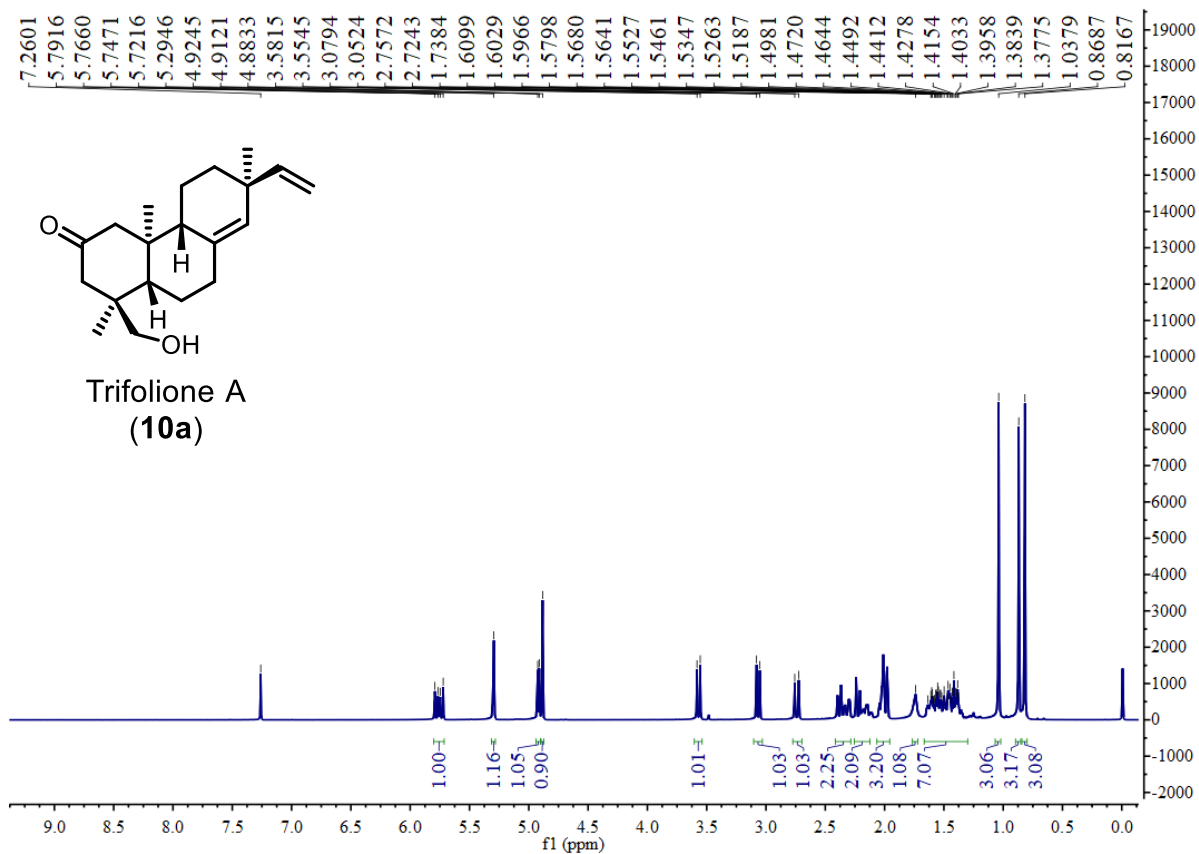

**Figure S150**  $^1\text{H}$  NMR spectrum of **10a** in  $\text{CDCl}_3$  (400 MHz).

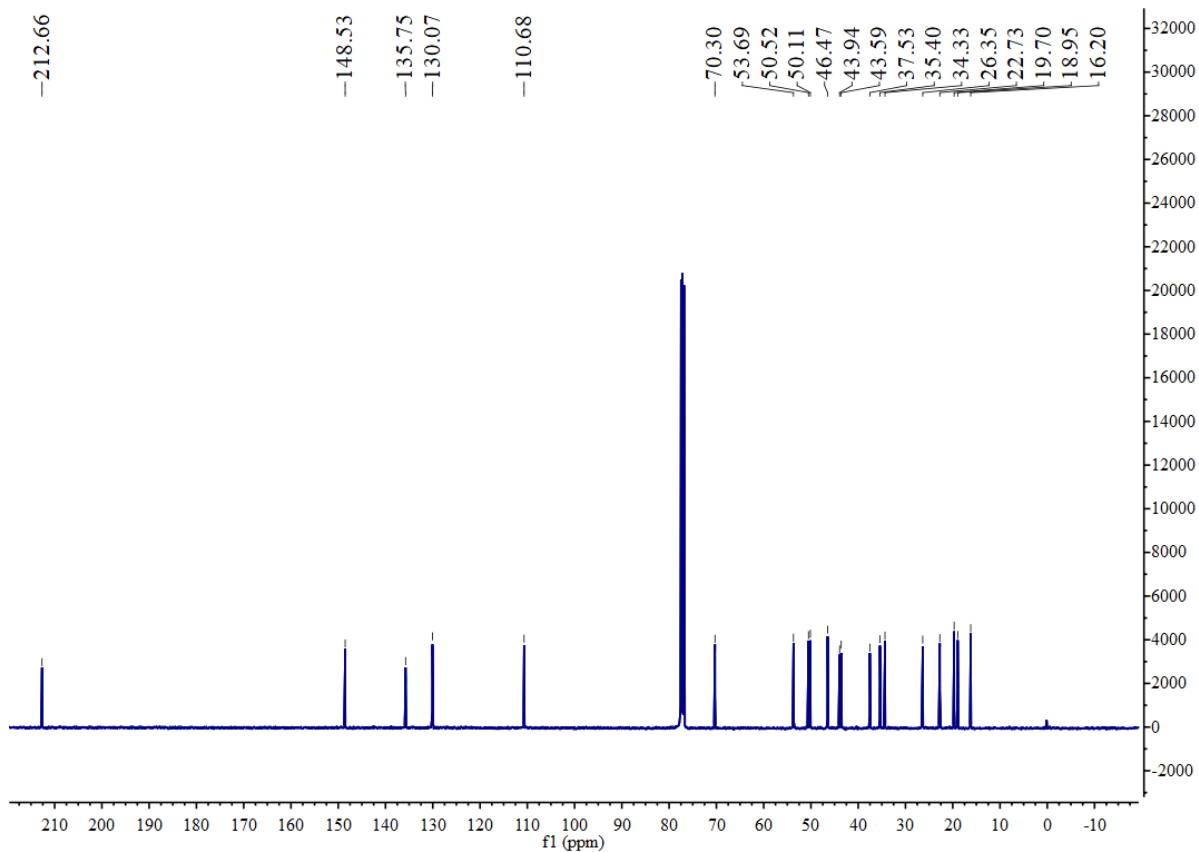

**Figure S151**  $^{13}\text{C}$  NMR spectrum of **10a** in  $\text{CDCl}_3$  (100 MHz).

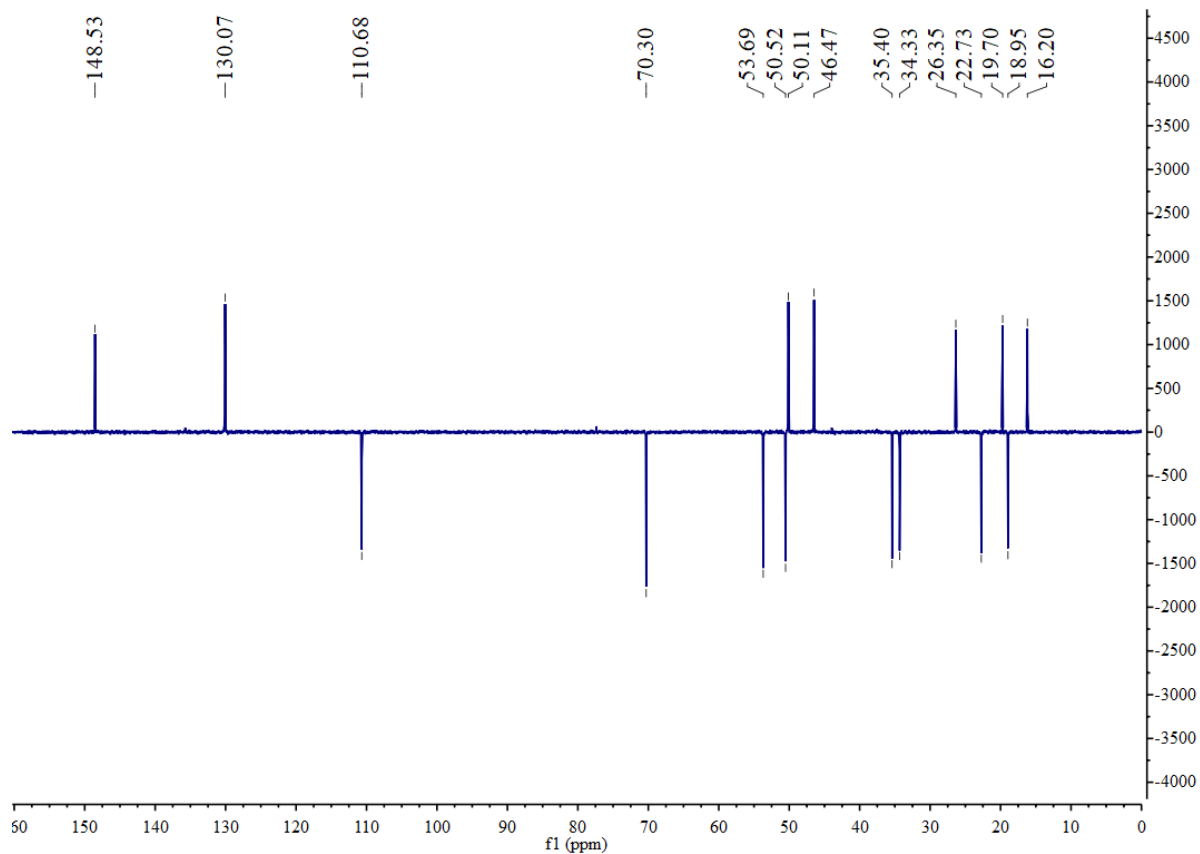

**Figure S152** DEPT-135 NMR spectrum of **10a** in CDCl<sub>3</sub> (100 MHz).

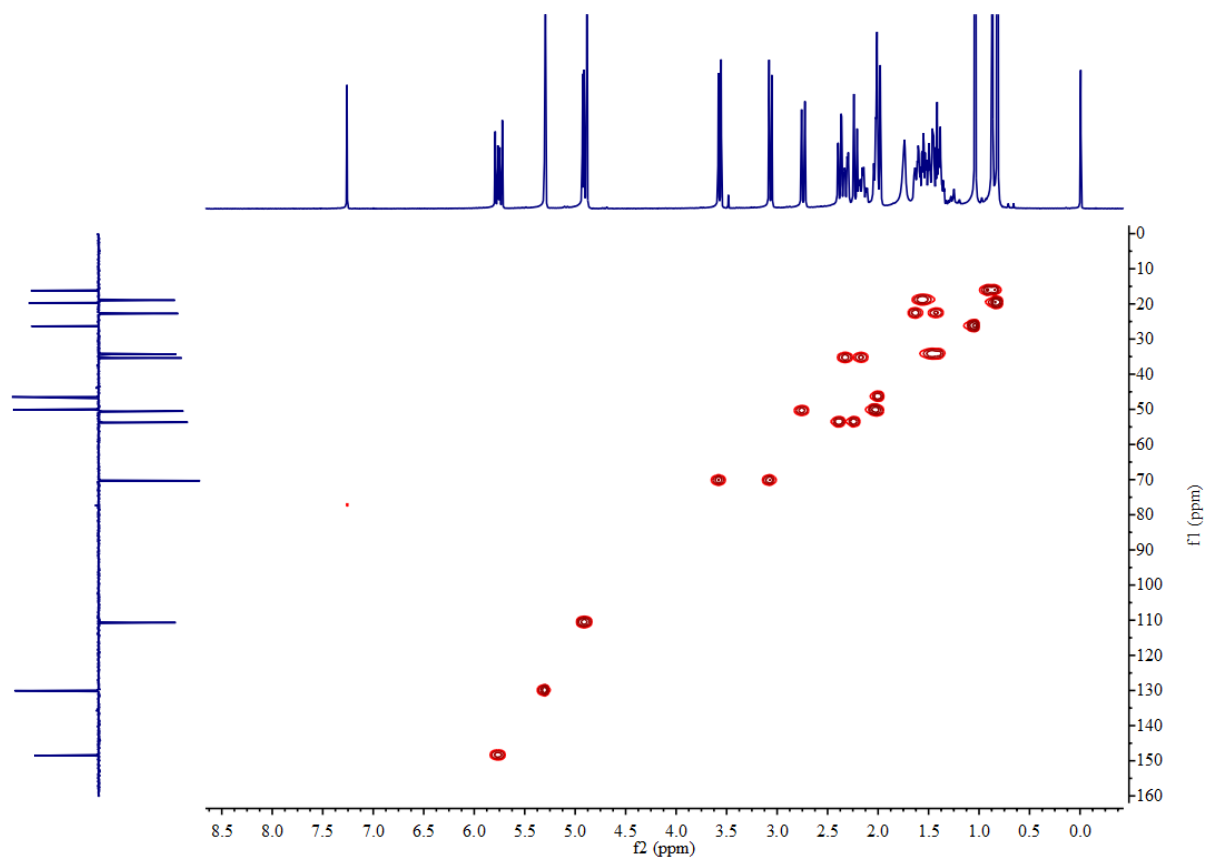

**Figure S153** HSQC spectrum of **10a** in CDCl<sub>3</sub> (400 MHz).

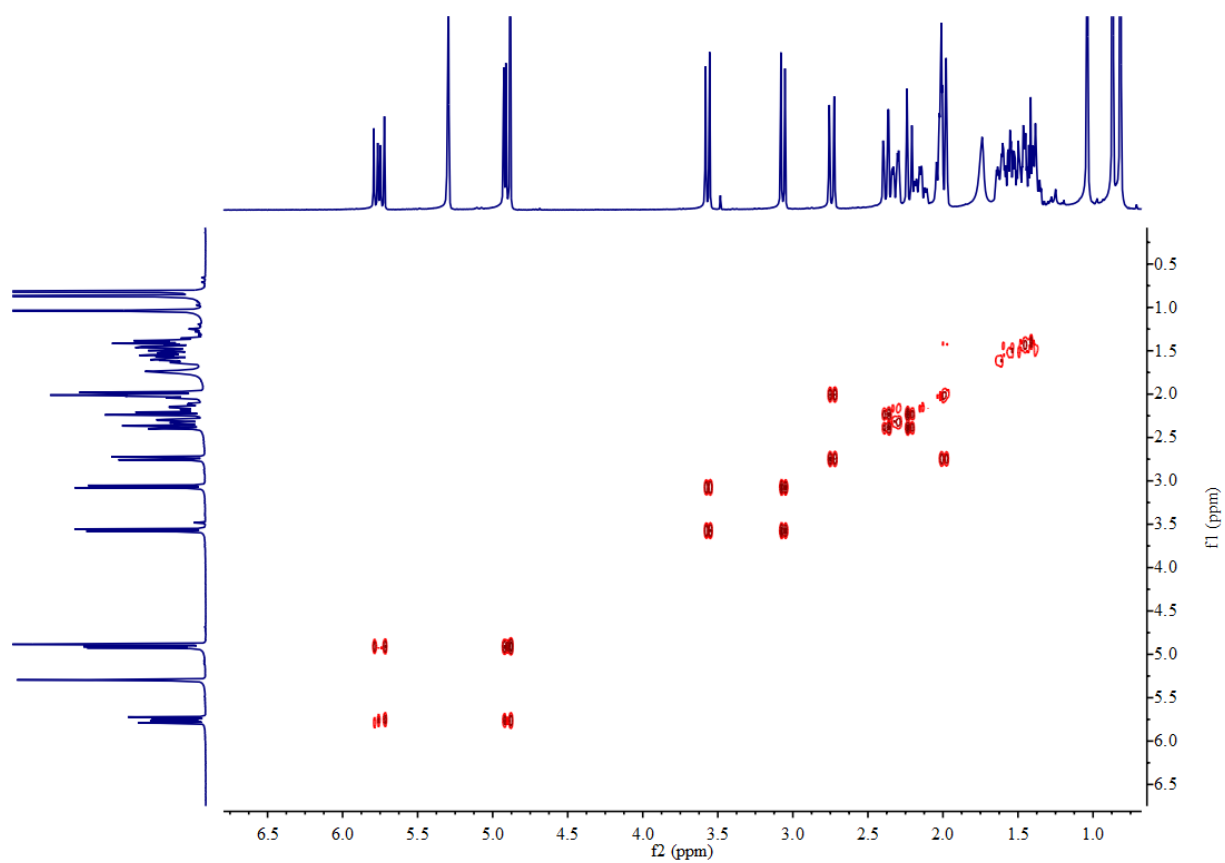

Figure S154  $^1\text{H}$ - $^1\text{H}$  COSY spectrum of **10a** in  $\text{CDCl}_3$  (400 MHz).

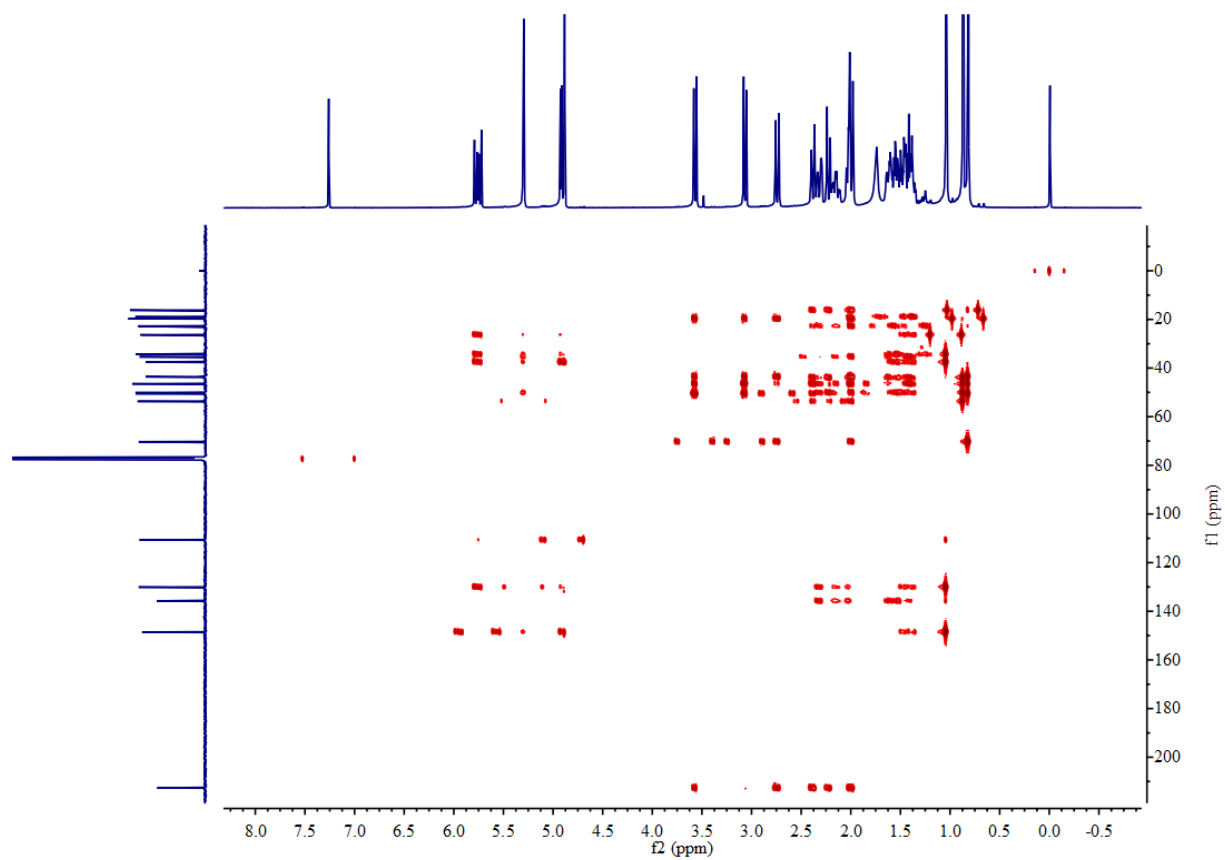

Figure S155 HMBC spectrum of **10a** in  $\text{CDCl}_3$  (400 MHz).

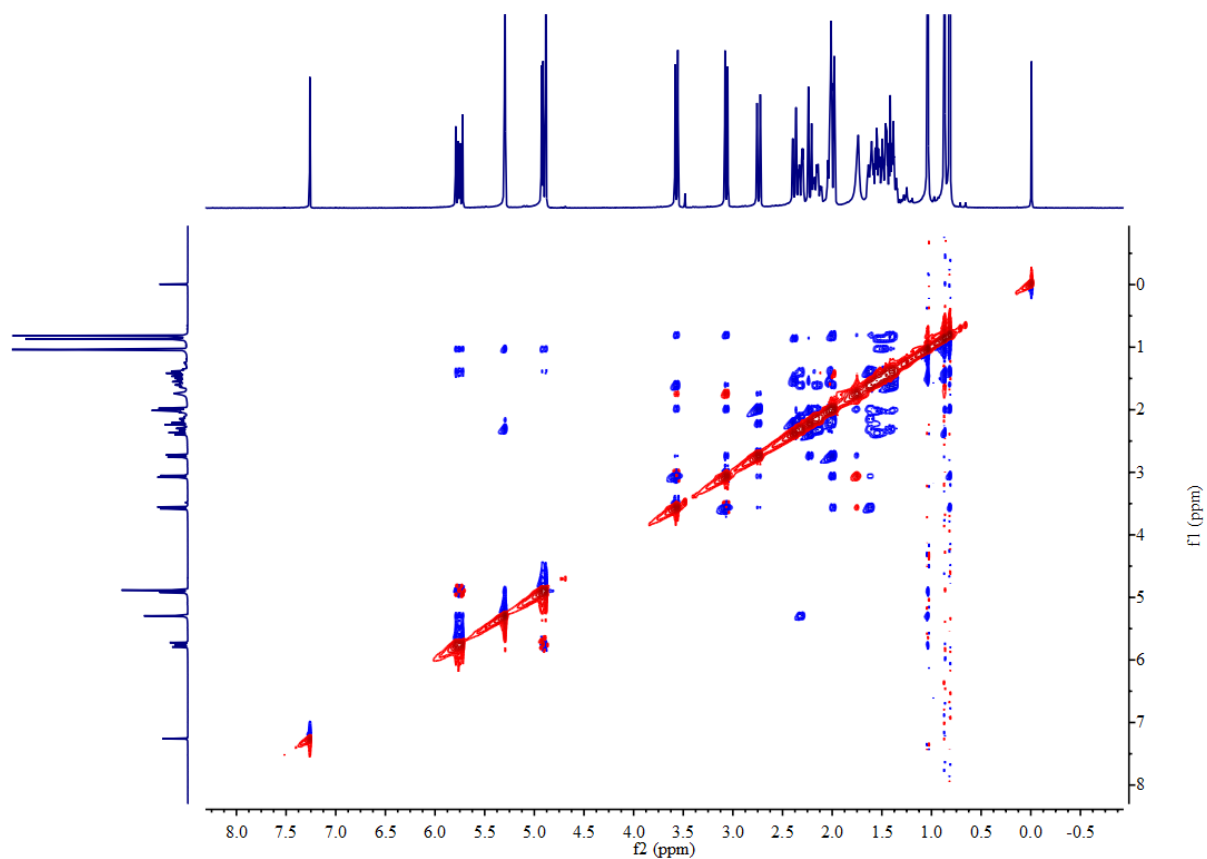

Figure S156 NOESY spectrum of **10a** in CDCl<sub>3</sub> (400 MHz).

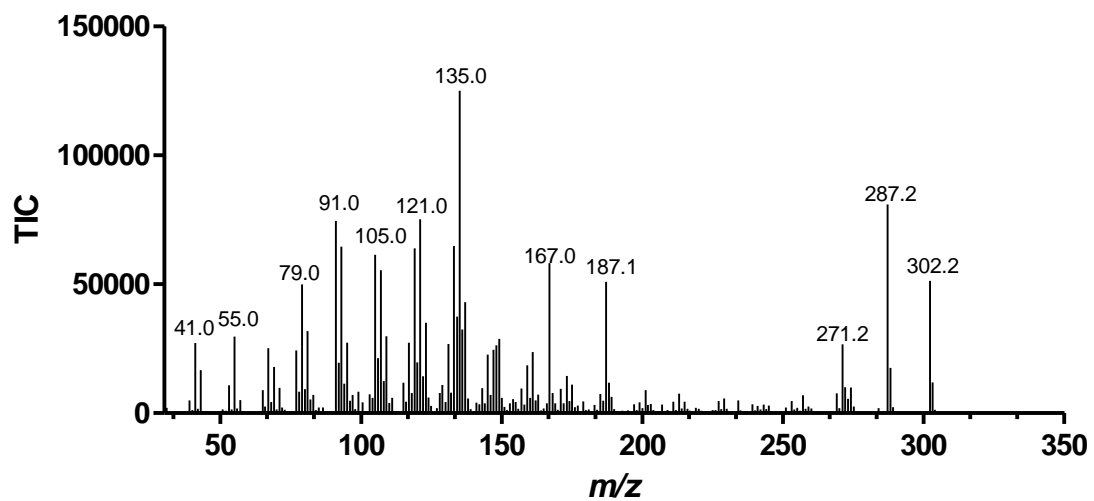

Figure S157 EI mass spectrum of **10a**.

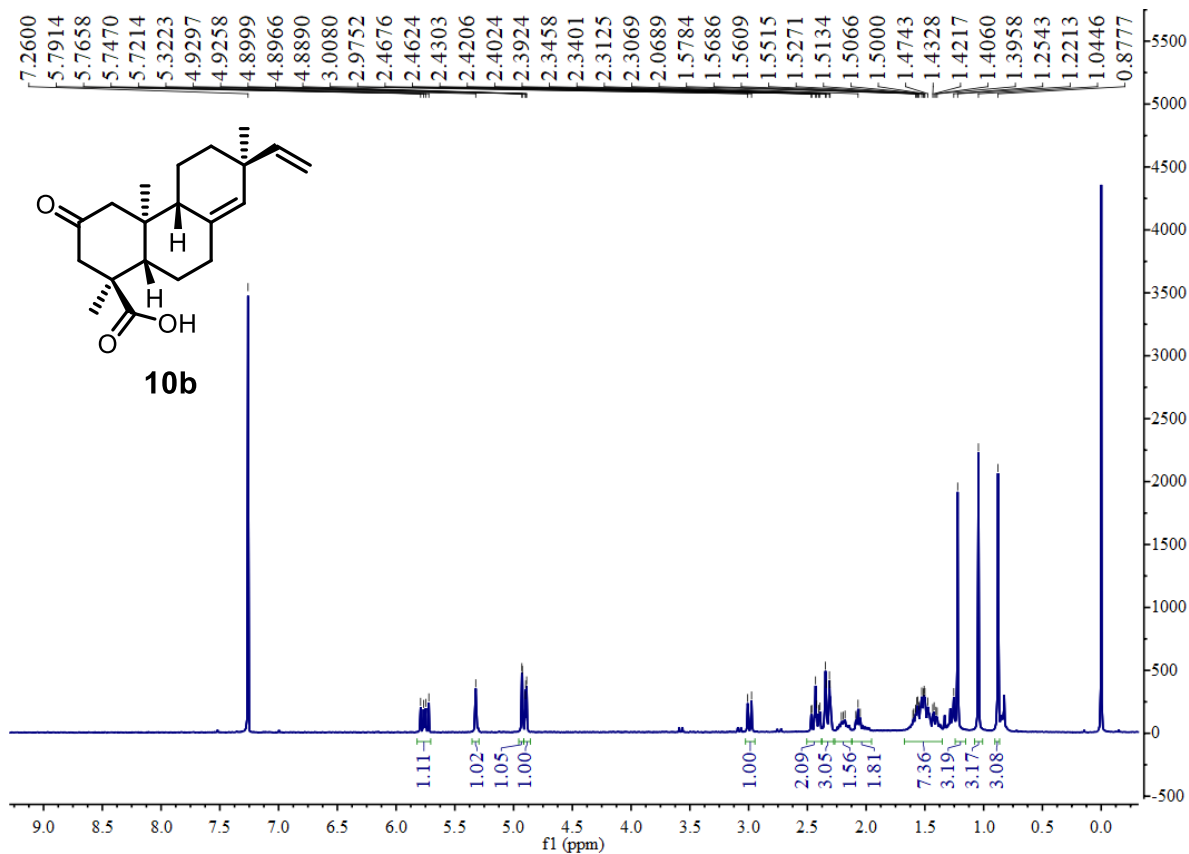

**Figure S158**  $^1\text{H}$  NMR spectrum of **10b** in  $\text{CDCl}_3$  (400 MHz).

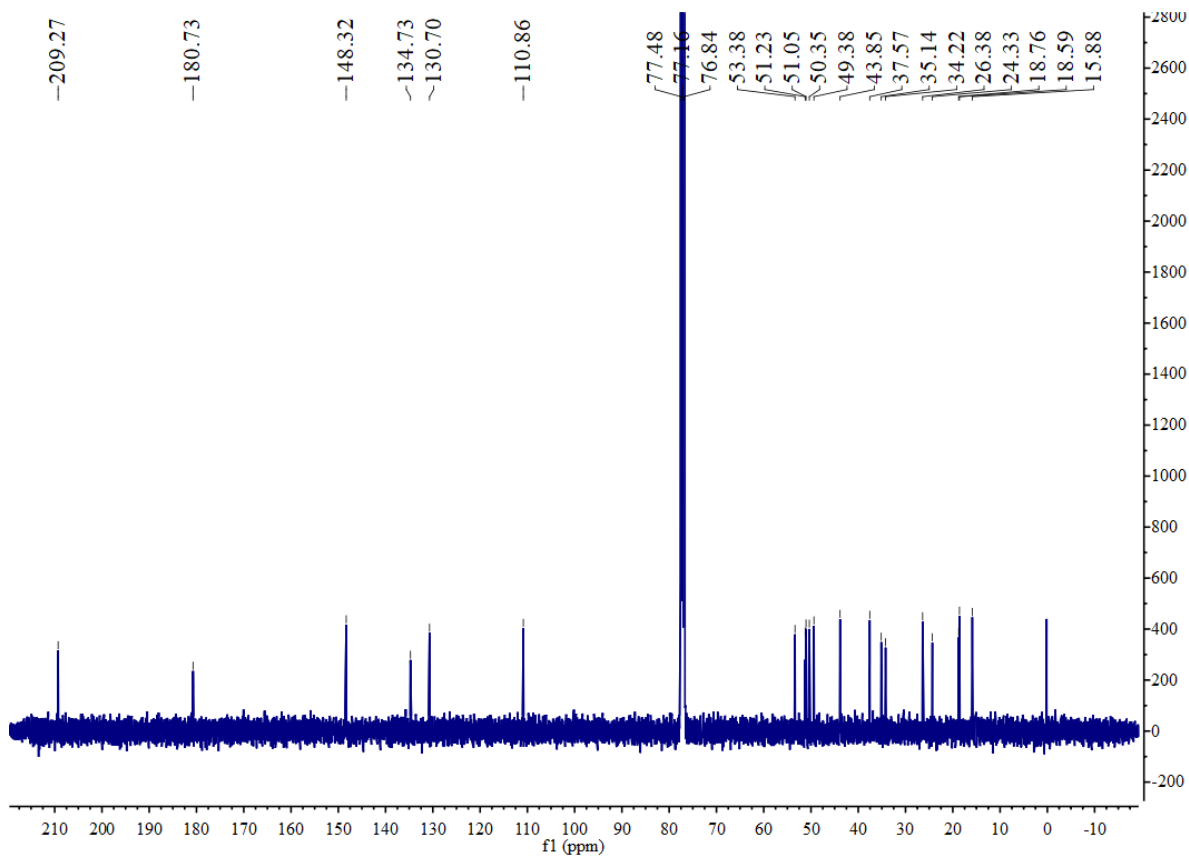

**Figure S159**  $^{13}\text{C}$  NMR spectrum of **10b** in  $\text{CDCl}_3$  (100 MHz).



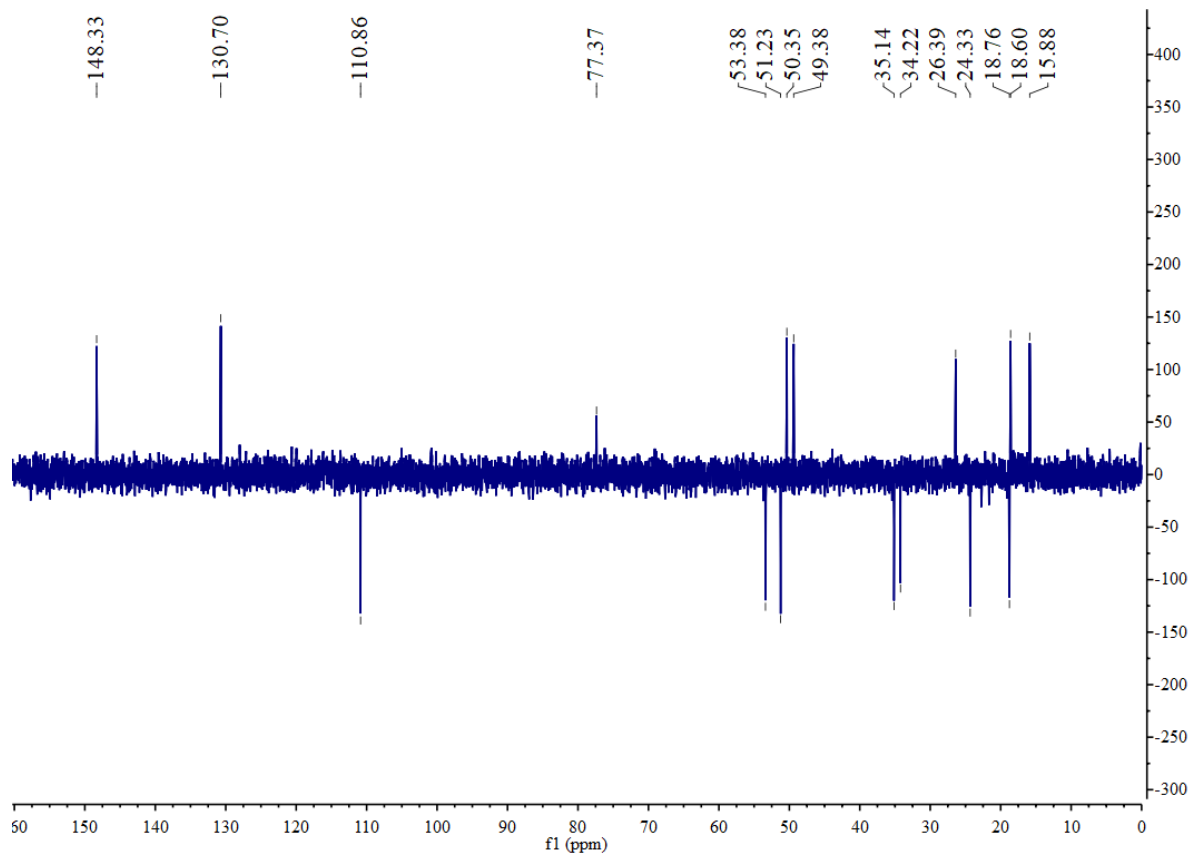

Figure S160 DEPT-135 NMR spectrum of **10b** in CDCl<sub>3</sub> (100 MHz).



Figure S161 HSQC spectrum of **10b** in CDCl<sub>3</sub> (400 MHz).

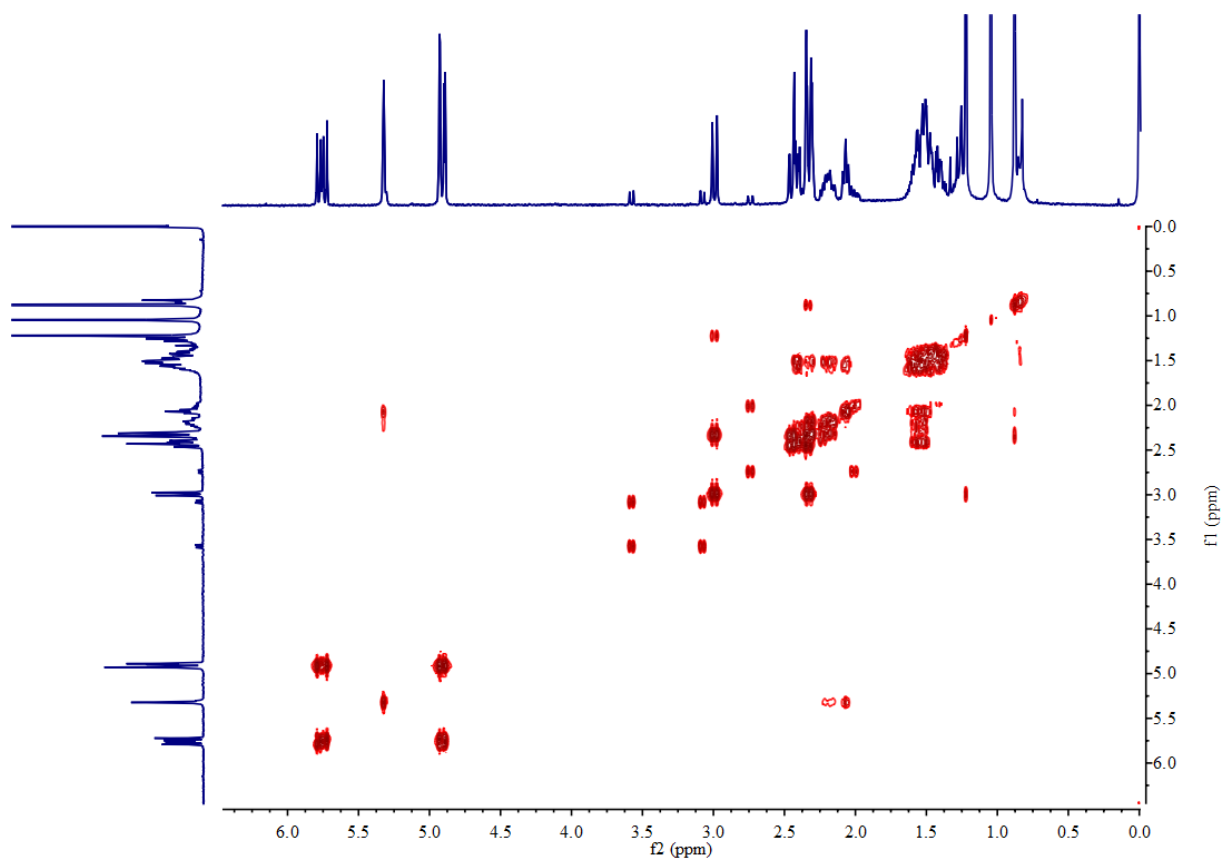

Figure S162  $^1\text{H}$ - $^1\text{H}$  COSY spectrum of **10b** in  $\text{CDCl}_3$  (400 MHz).

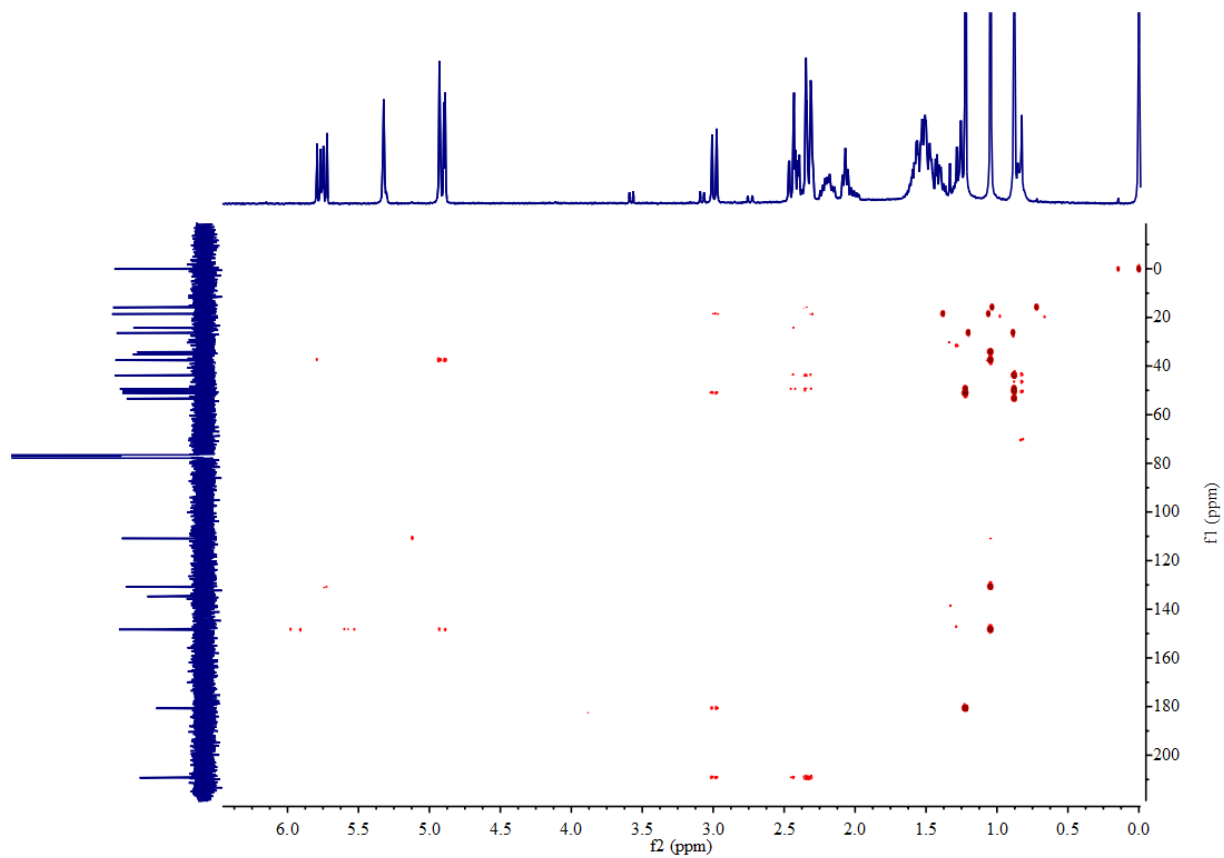

Figure S163 HMBC spectrum of **10b** in  $\text{CDCl}_3$  (400 MHz).

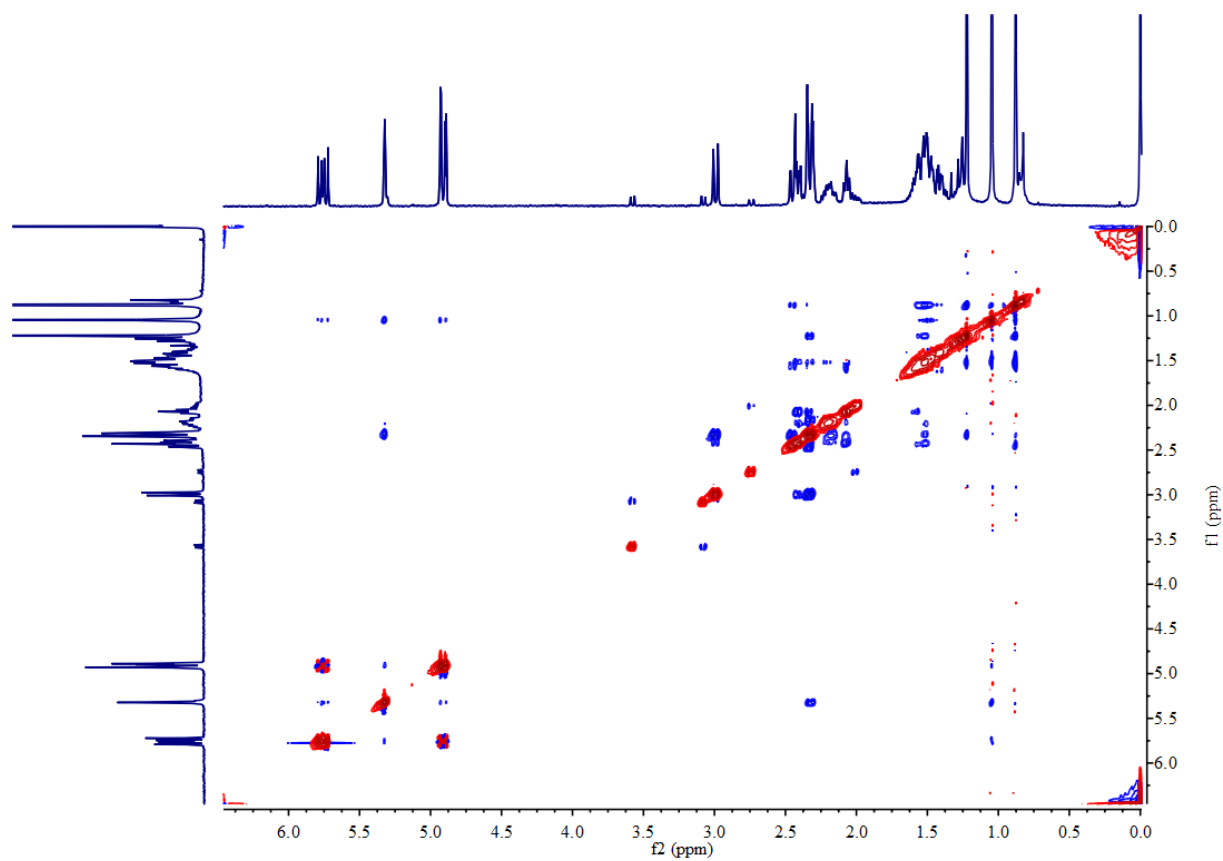

Figure S164 NOESY spectrum of **10b** in  $\text{CDCl}_3$  (400 MHz).

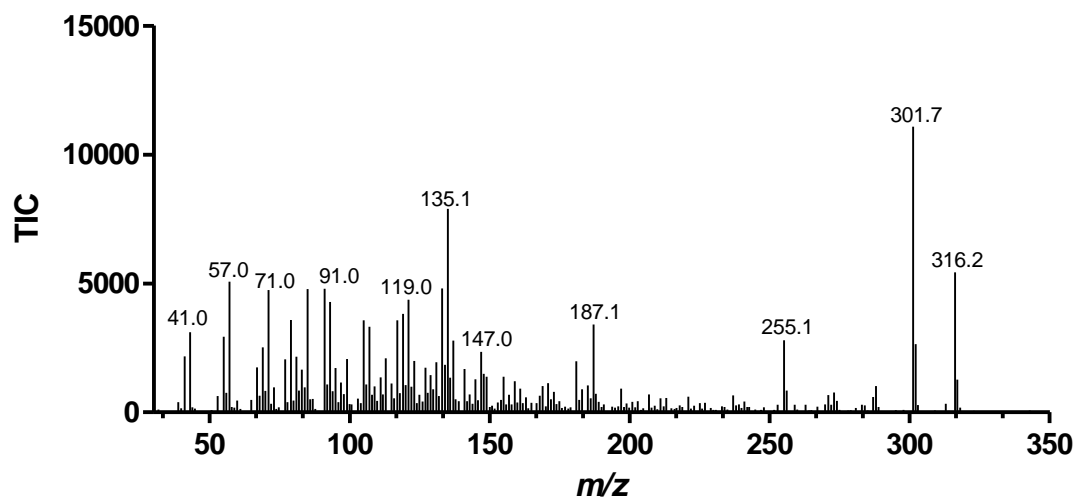

Figure S165 EI mass spectrum of **10b**.

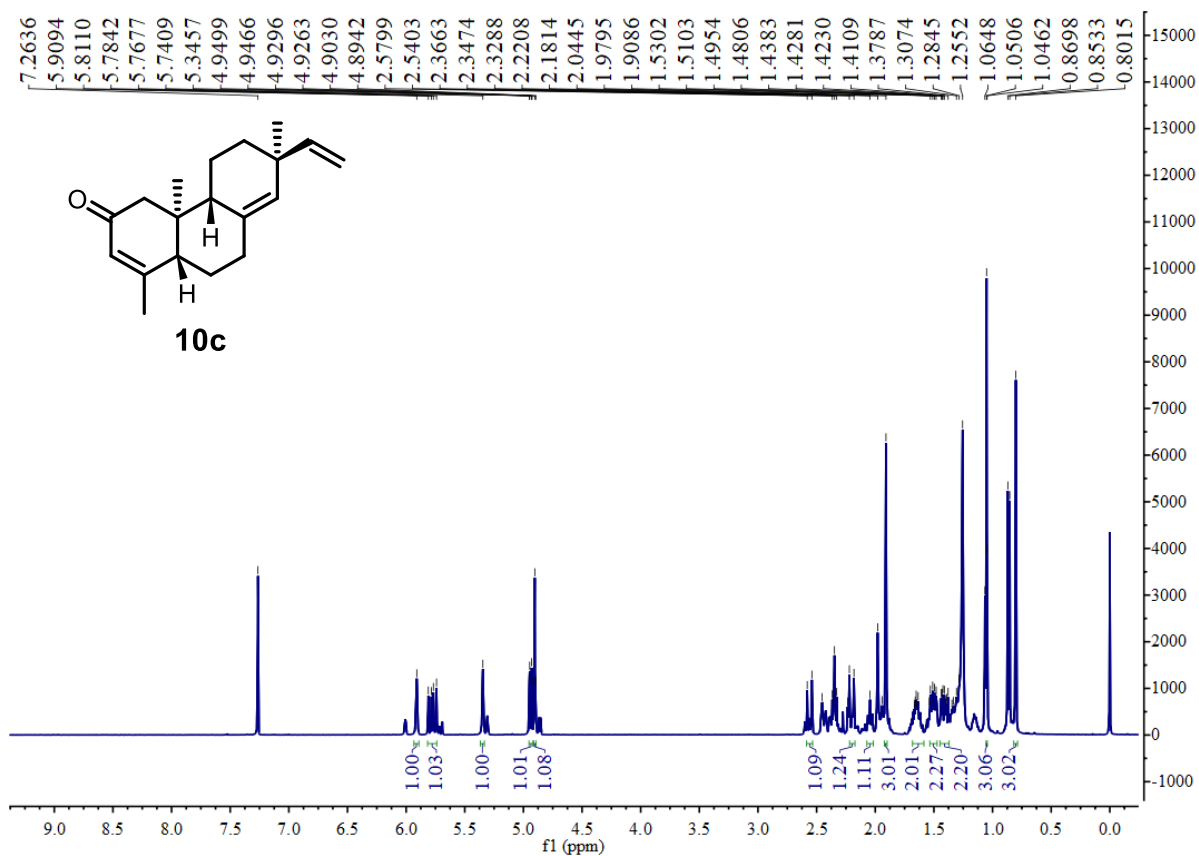

**Figure S166**  $^1\text{H}$  NMR spectrum of **10c** in  $\text{CDCl}_3$  (400 MHz).

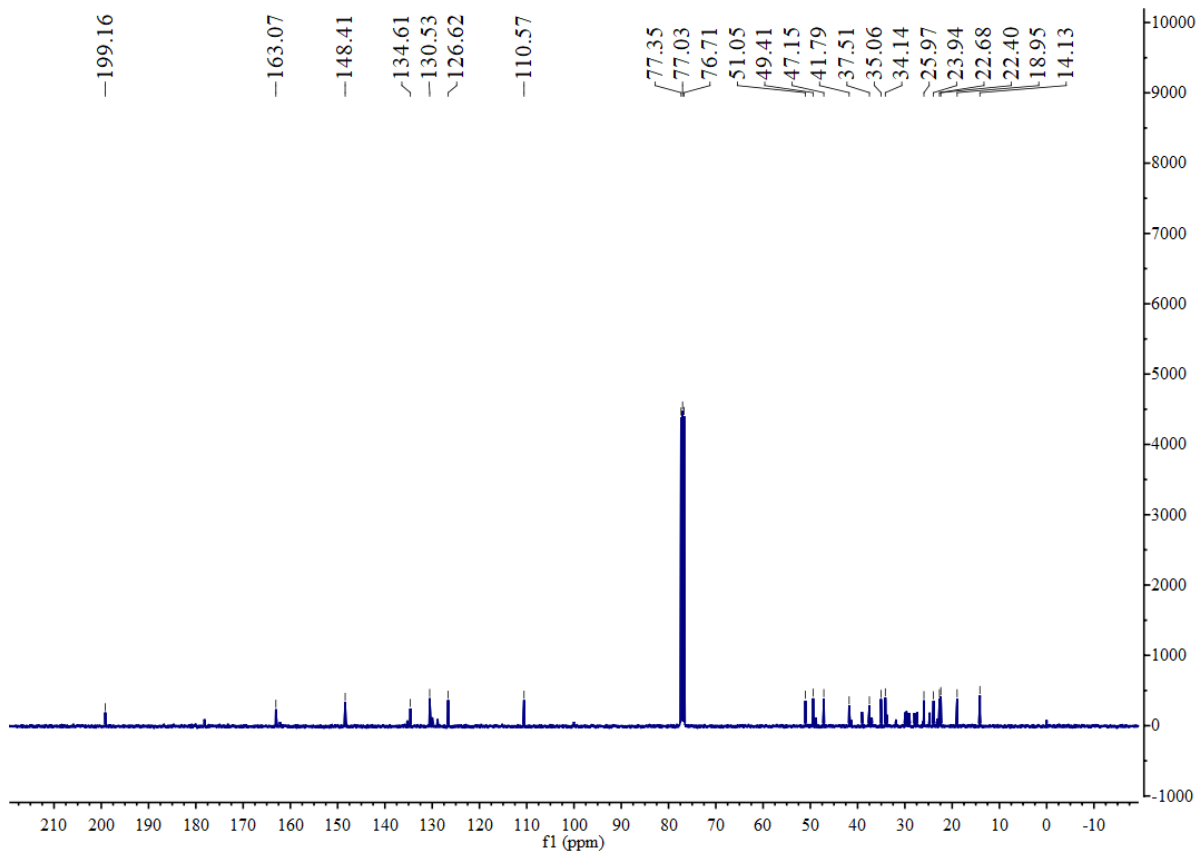

**Figure S167**  $^{13}\text{C}$  NMR spectrum of **10c** in  $\text{CDCl}_3$  (100 MHz).

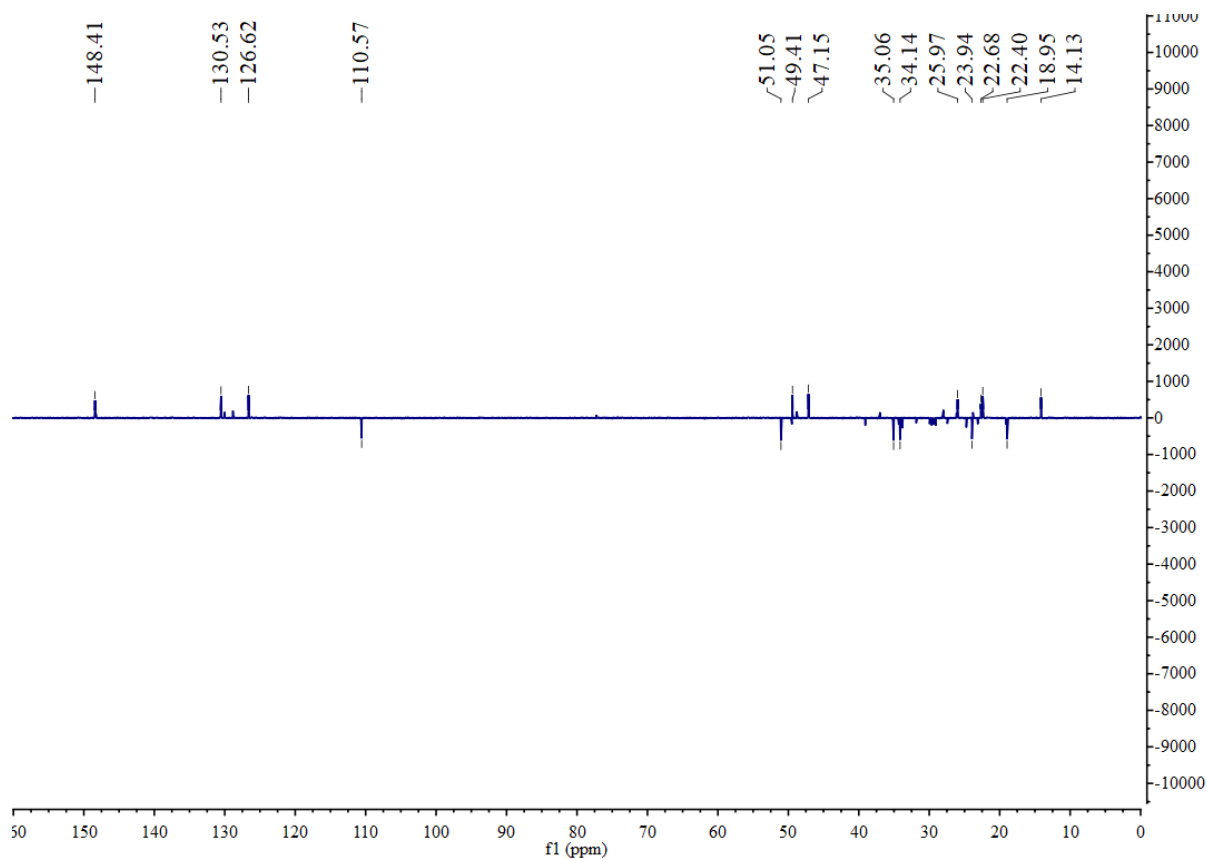

Figure S168 DEPT-135 NMR spectrum of **10c** in CDCl<sub>3</sub> (100 MHz).

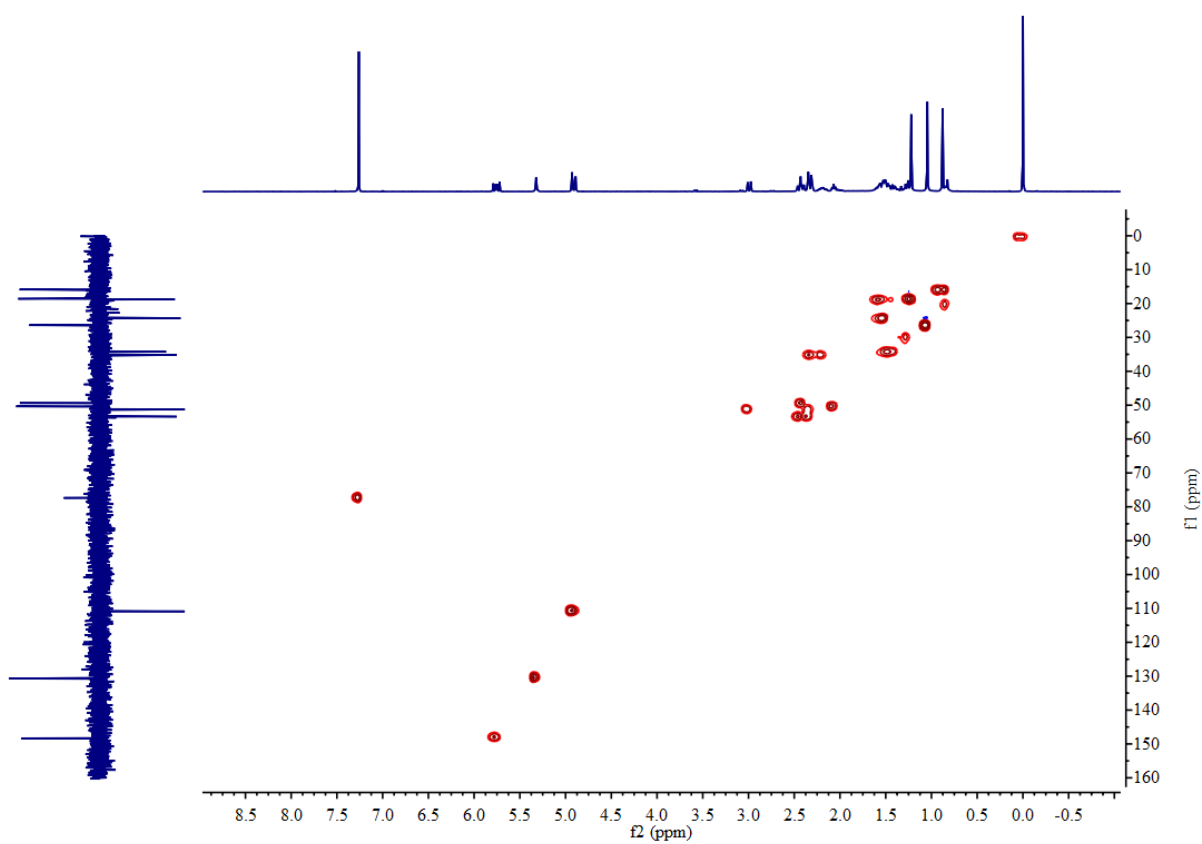

Figure S169 HSQC spectrum of **10c** in CDCl<sub>3</sub> (400 MHz).

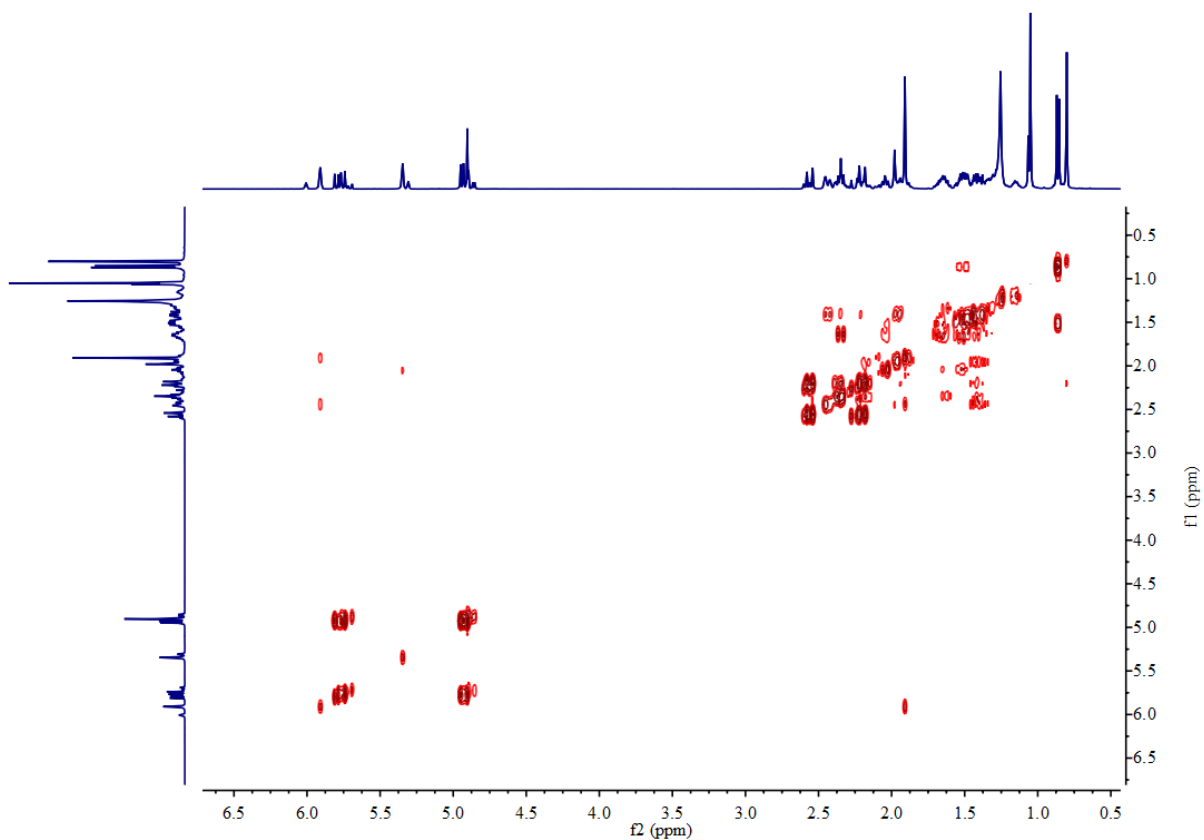

Figure S170  $^1\text{H}$ - $^1\text{H}$  COSY spectrum of **10c** in  $\text{CDCl}_3$  (400 MHz).

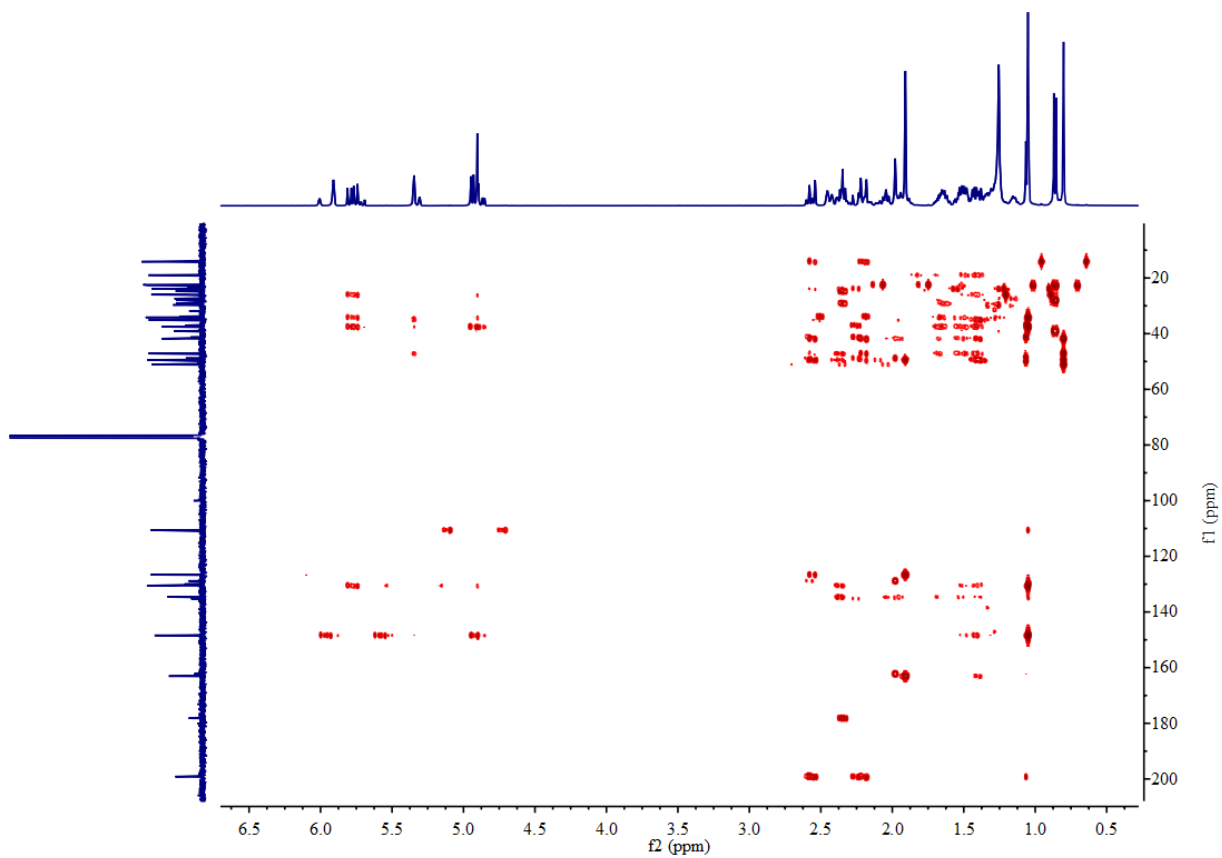

Figure S171 HMBC spectrum of **10c** in  $\text{CDCl}_3$  (400 MHz).

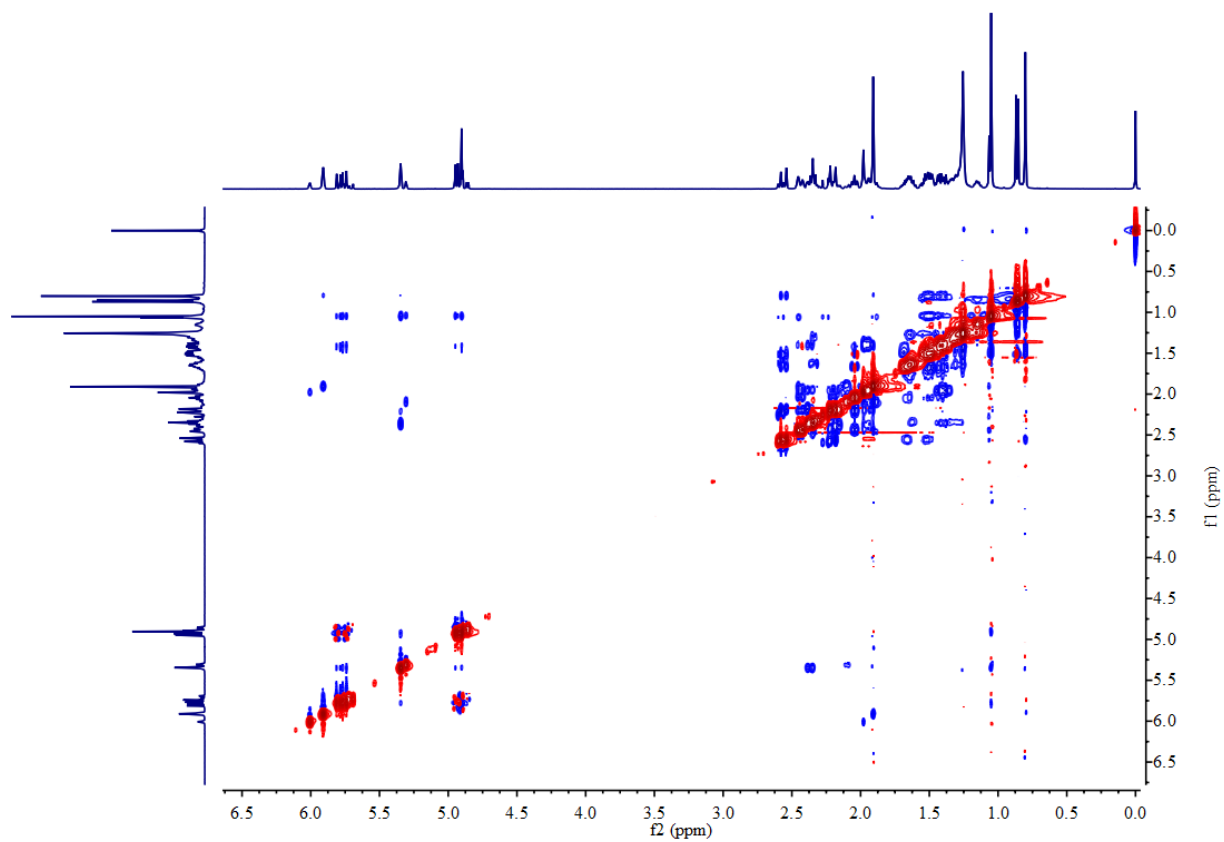

Figure S172 NOESY spectrum of **10c** in  $\text{CDCl}_3$  (400 MHz).

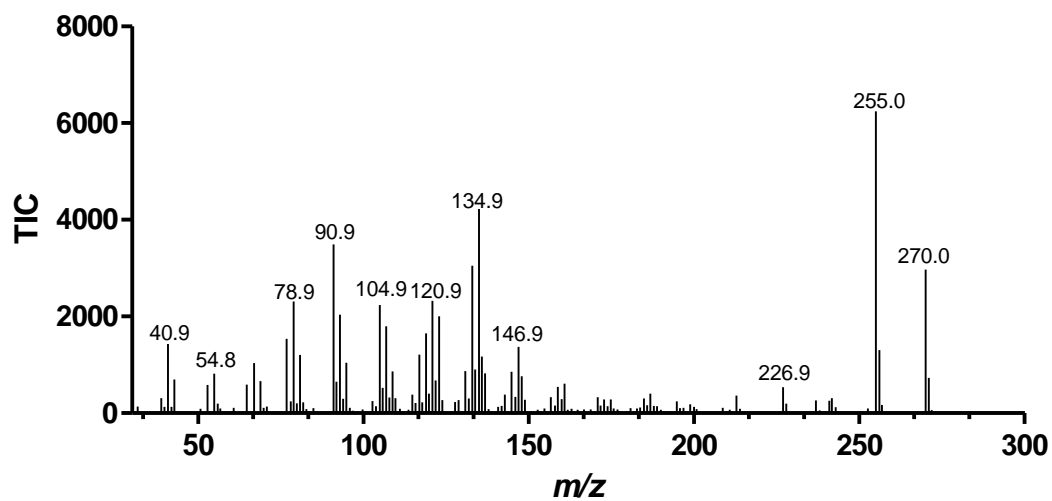

Figure S173 EI mass spectrum of **10c**.

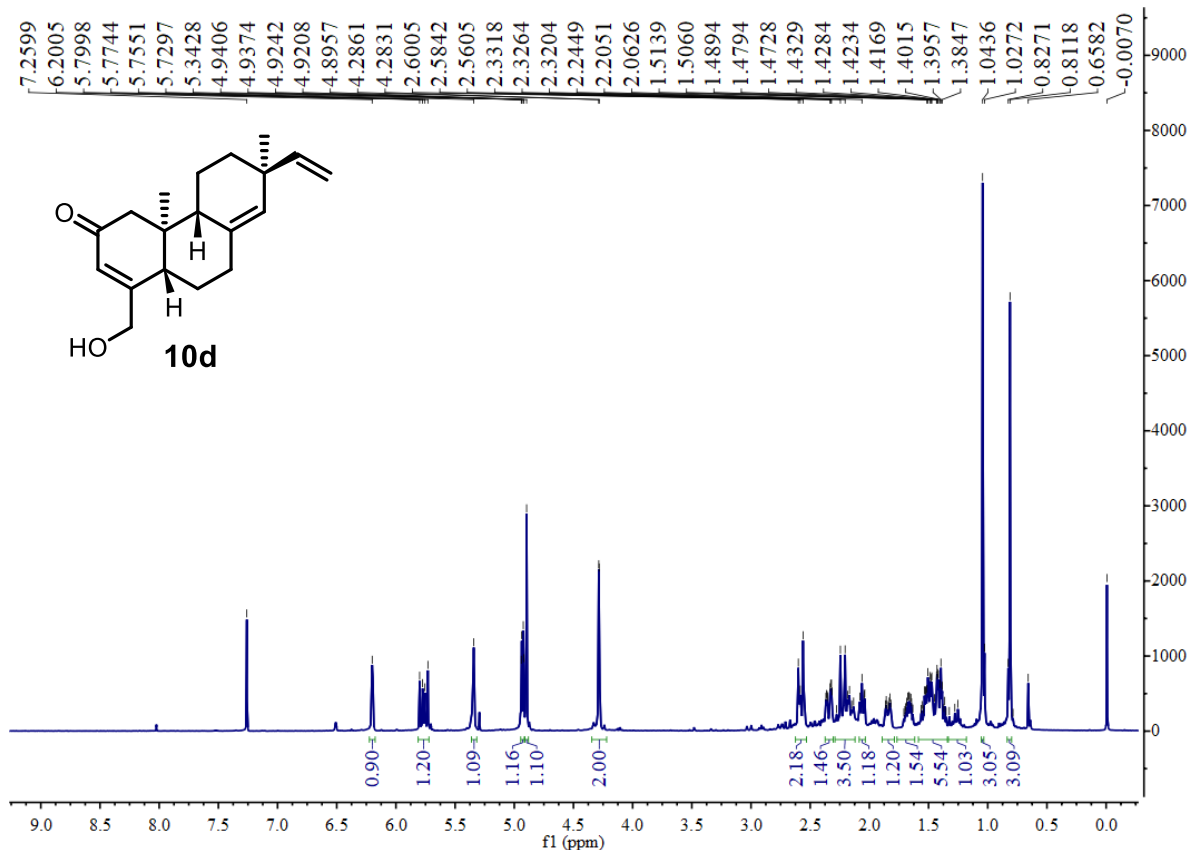

Figure S174 <sup>1</sup>H NMR spectrum of **10d** in CDCl<sub>3</sub> (400 MHz).

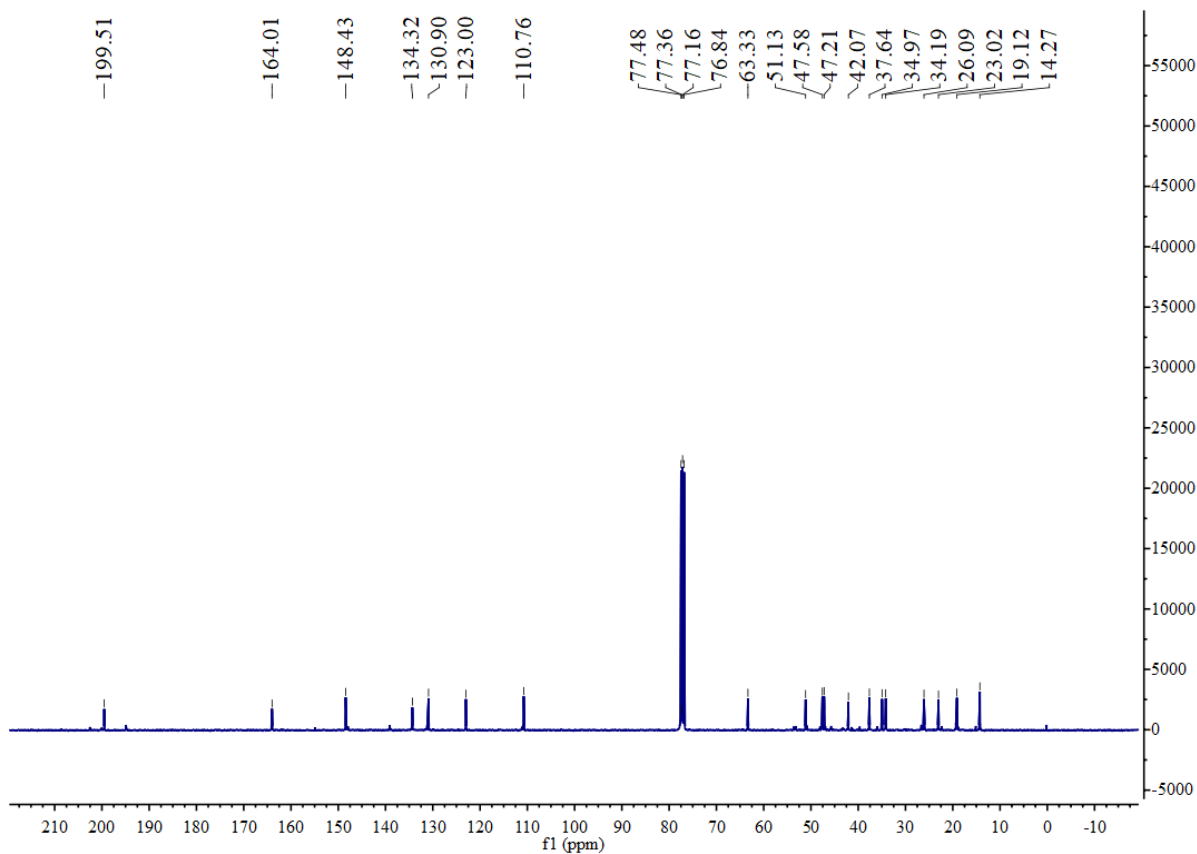

Figure S175 <sup>13</sup>C NMR spectrum of **10d** in CDCl<sub>3</sub> (100 MHz).



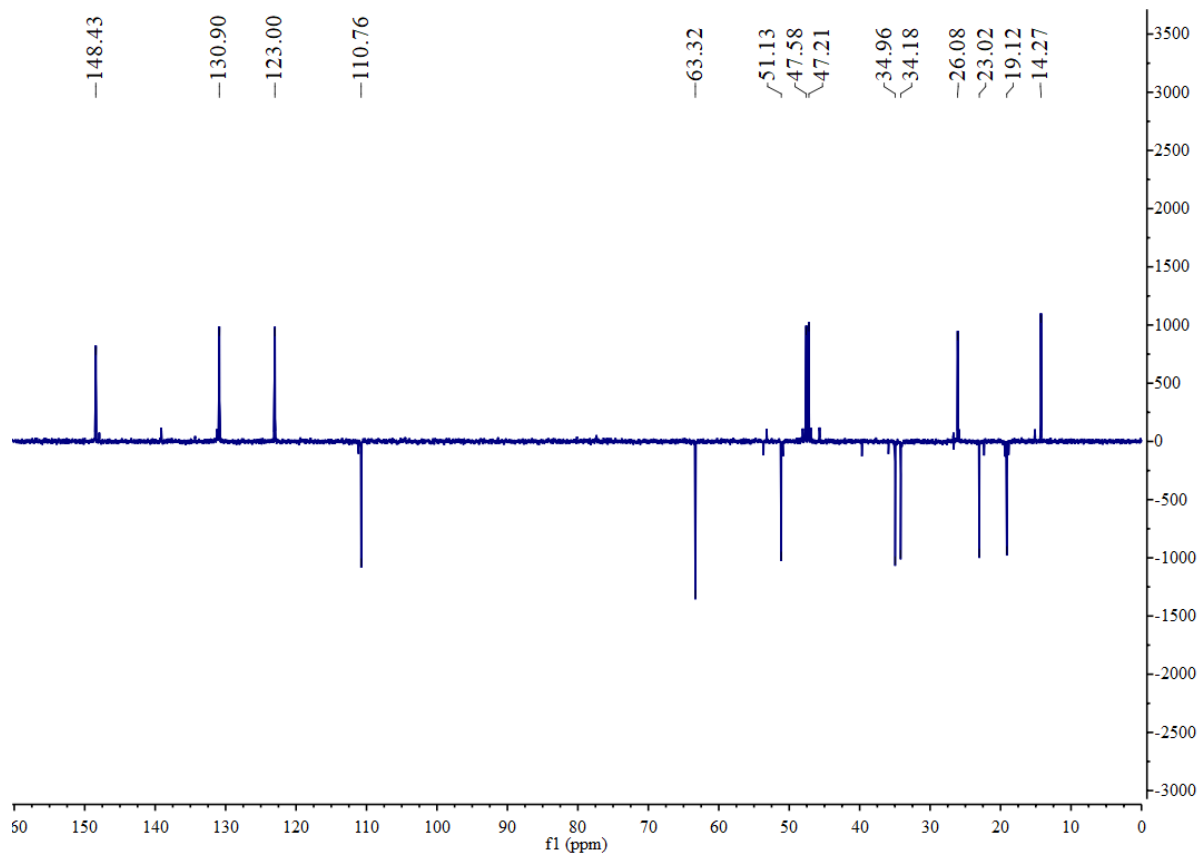

Figure S176 DEPT-135 NMR spectrum of **10d** in CDCl<sub>3</sub> (100 MHz).

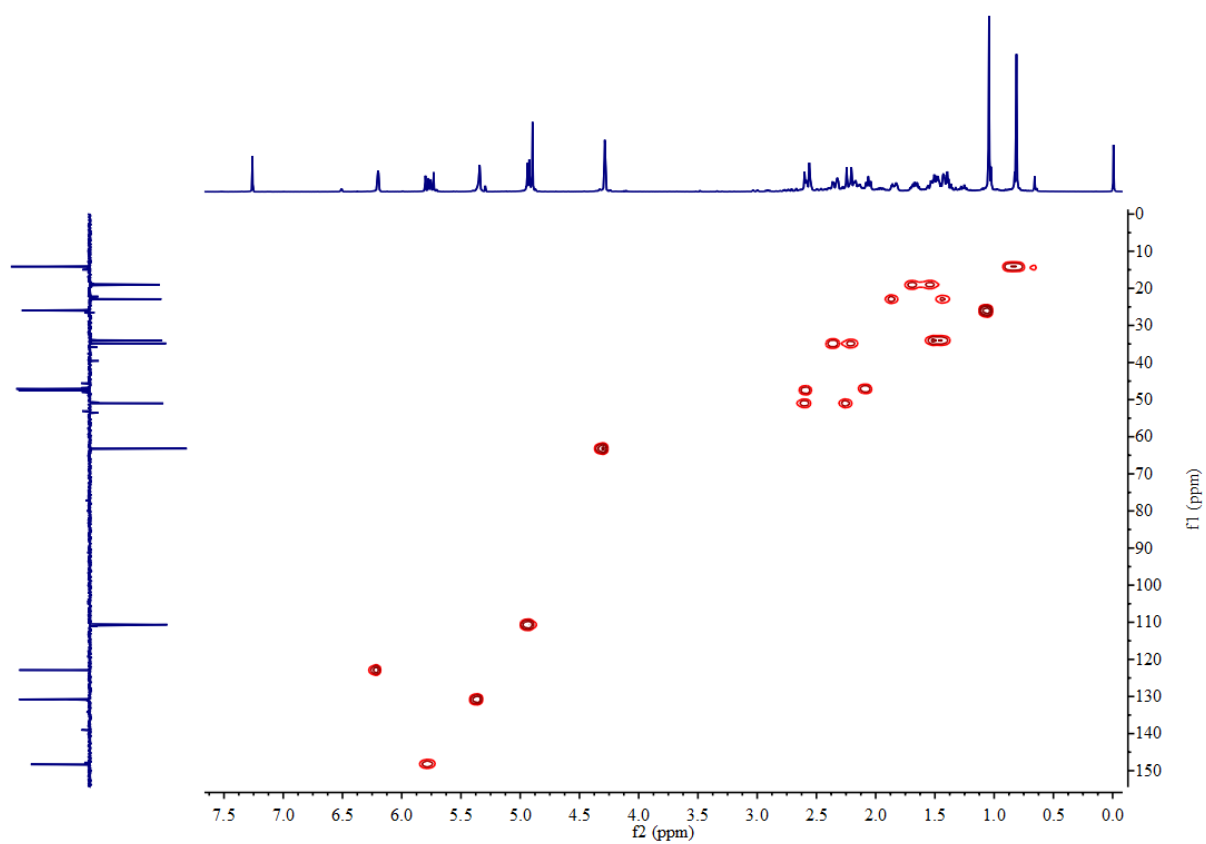

Figure S177 HSQC spectrum of **10d** in CDCl<sub>3</sub> (400 MHz).

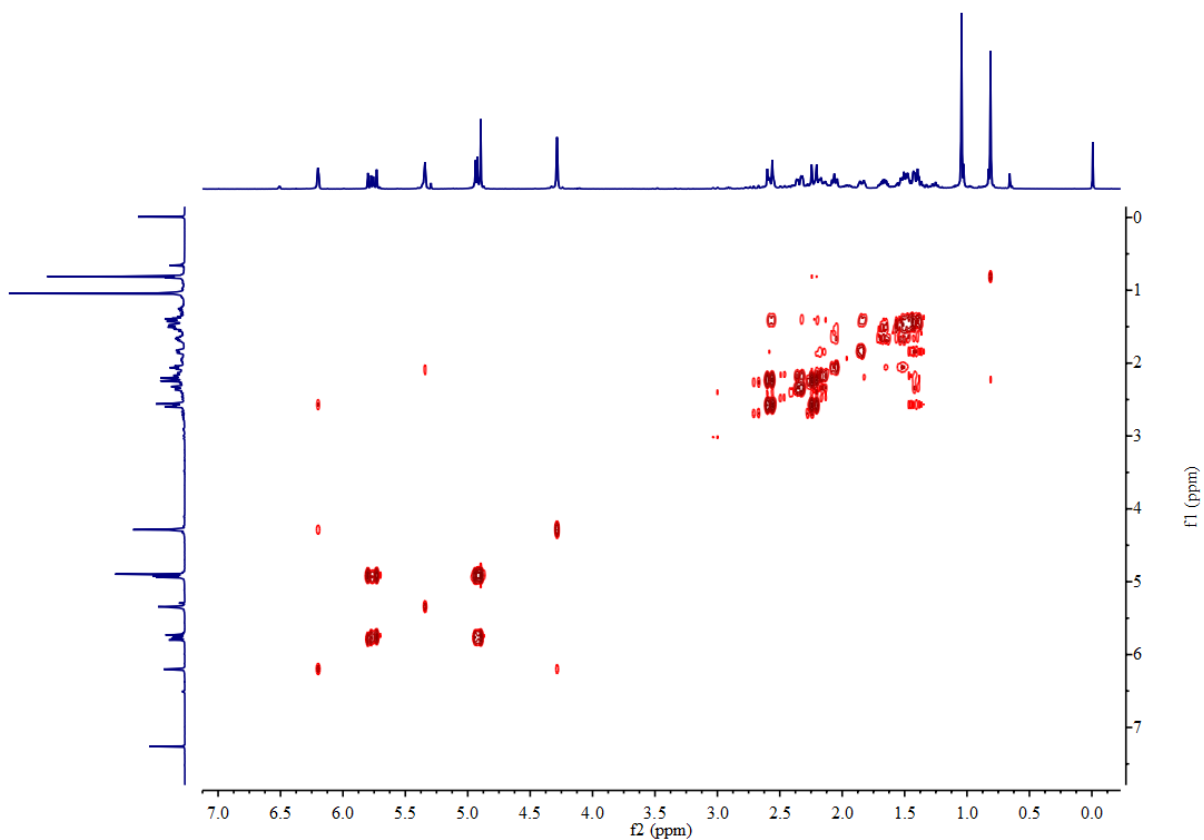

Figure S178  $^1\text{H}$ - $^1\text{H}$  COSY spectrum of **10d** in  $\text{CDCl}_3$  (400 MHz).

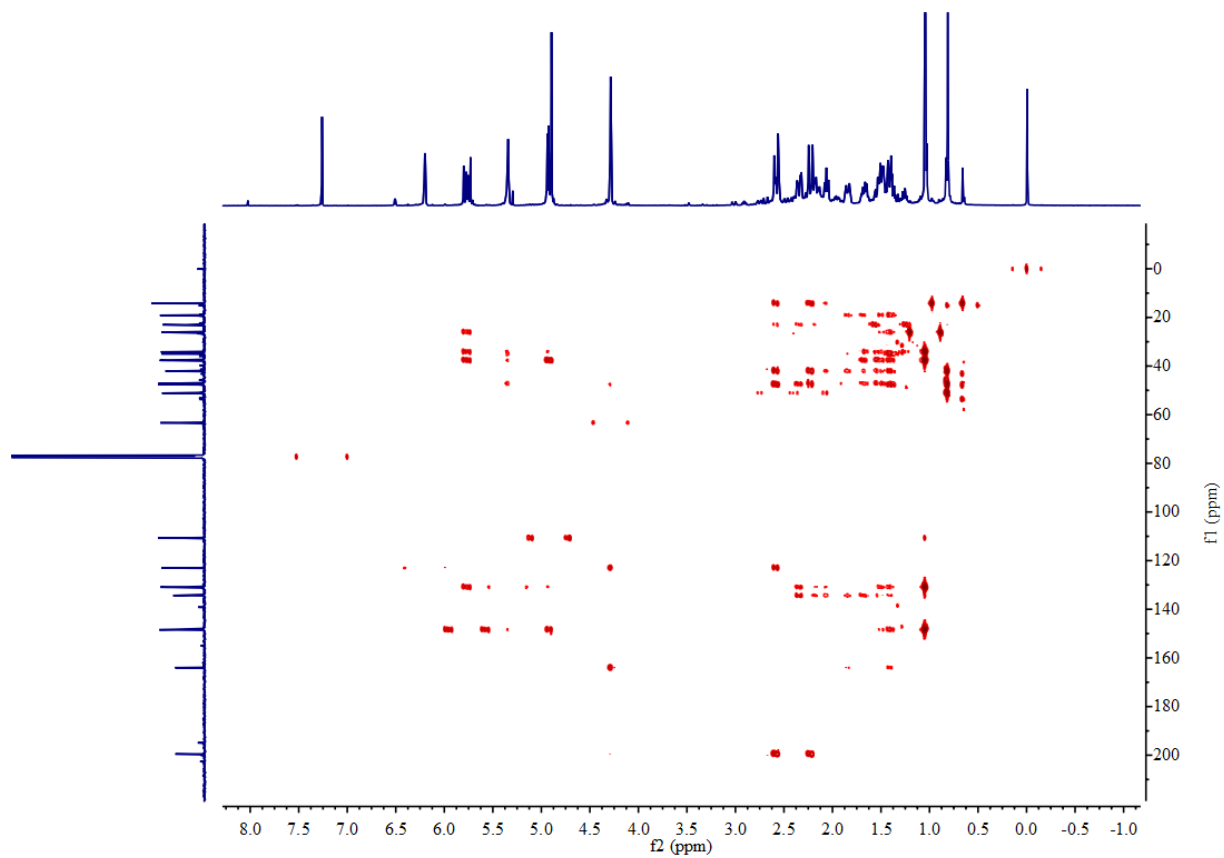

Figure S179 HMBC spectrum of **10d** in  $\text{CDCl}_3$  (400 MHz).

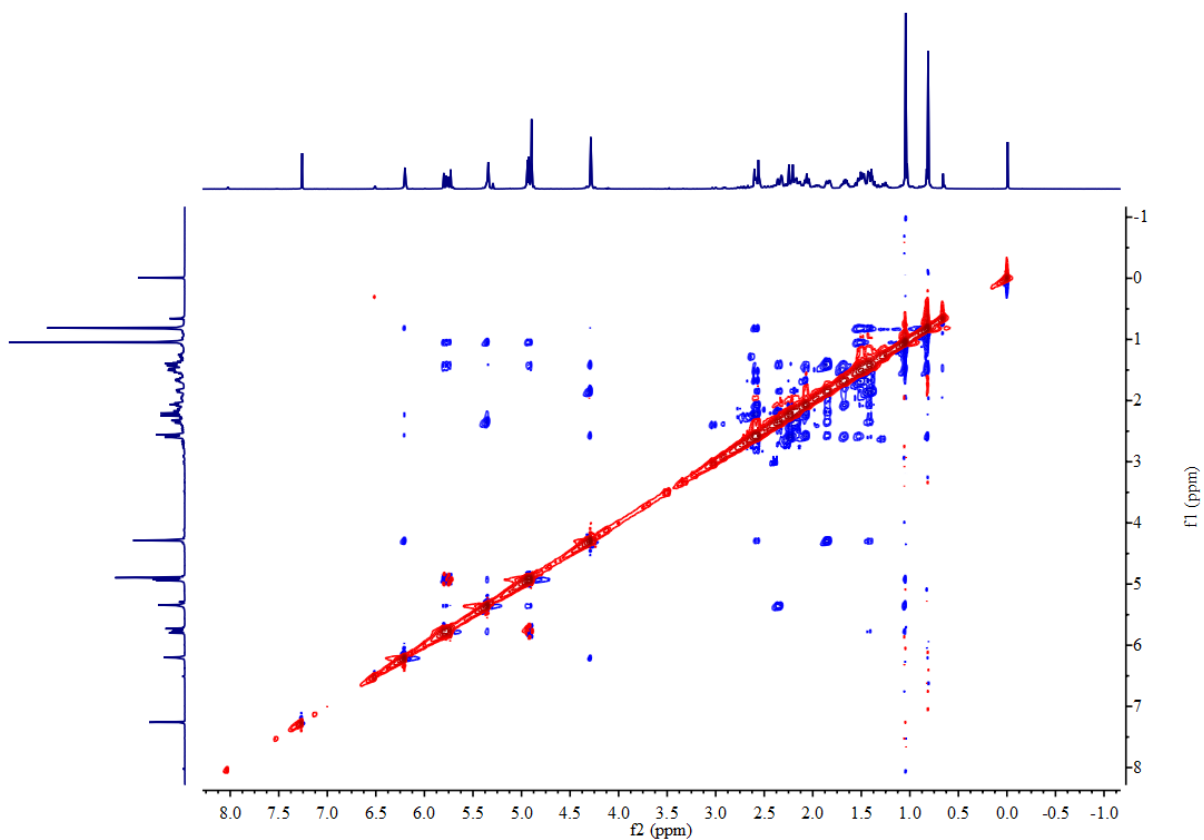

Figure S180 NOESY spectrum of **10d** in  $\text{CDCl}_3$  (400 MHz).

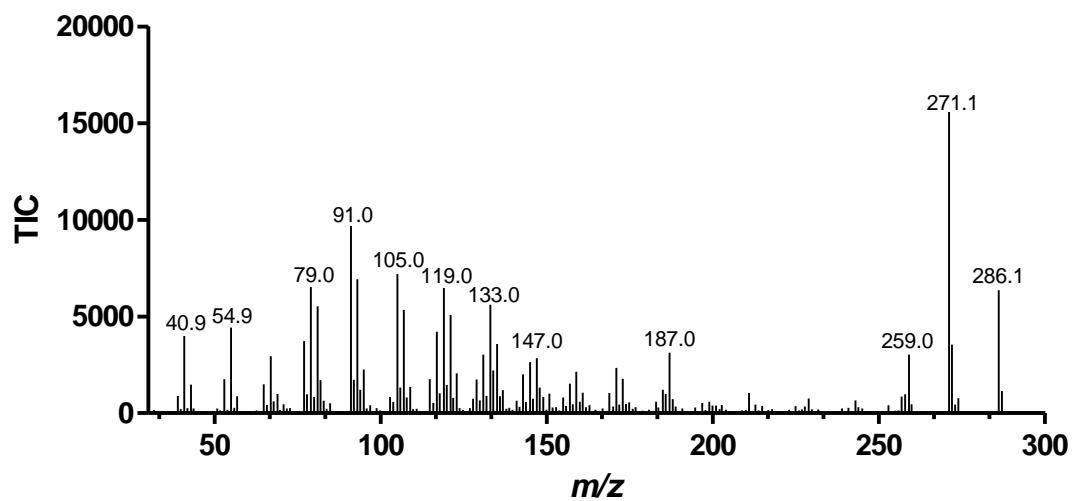

Figure S181 EI mass spectrum of **10d**.

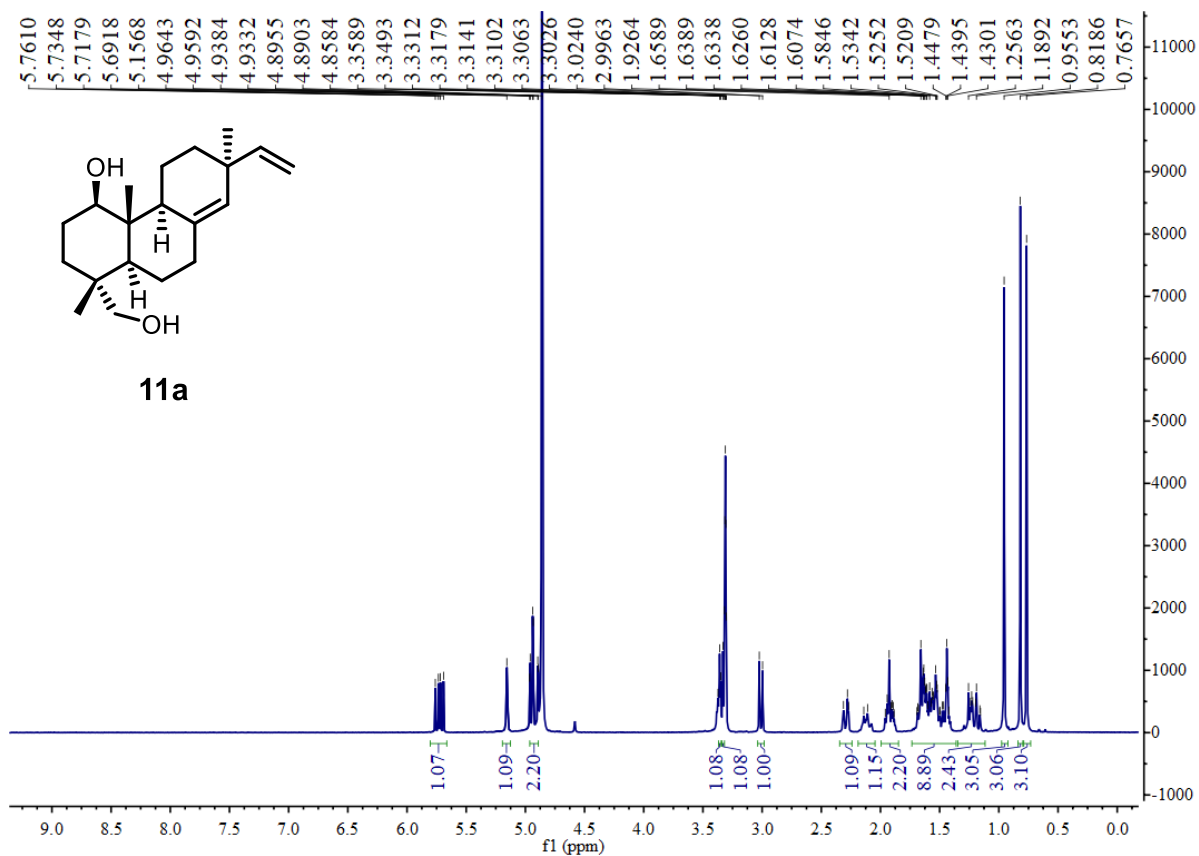

**Figure S182**  $^1\text{H}$  NMR spectrum of **11a** in methanol- $d_4$  (400 MHz).

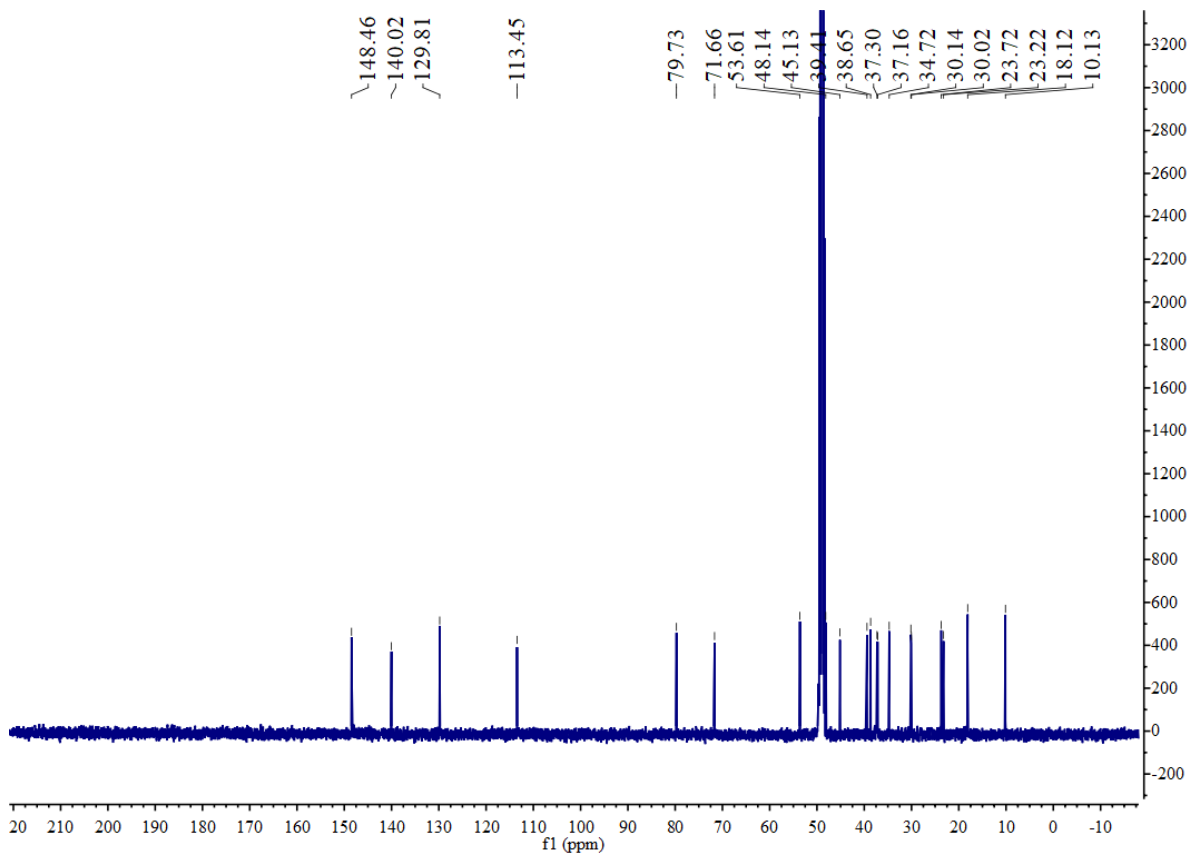

**Figure S183**  $^{13}\text{C}$  NMR spectrum of **11a** in methanol- $d_4$  (100 MHz).

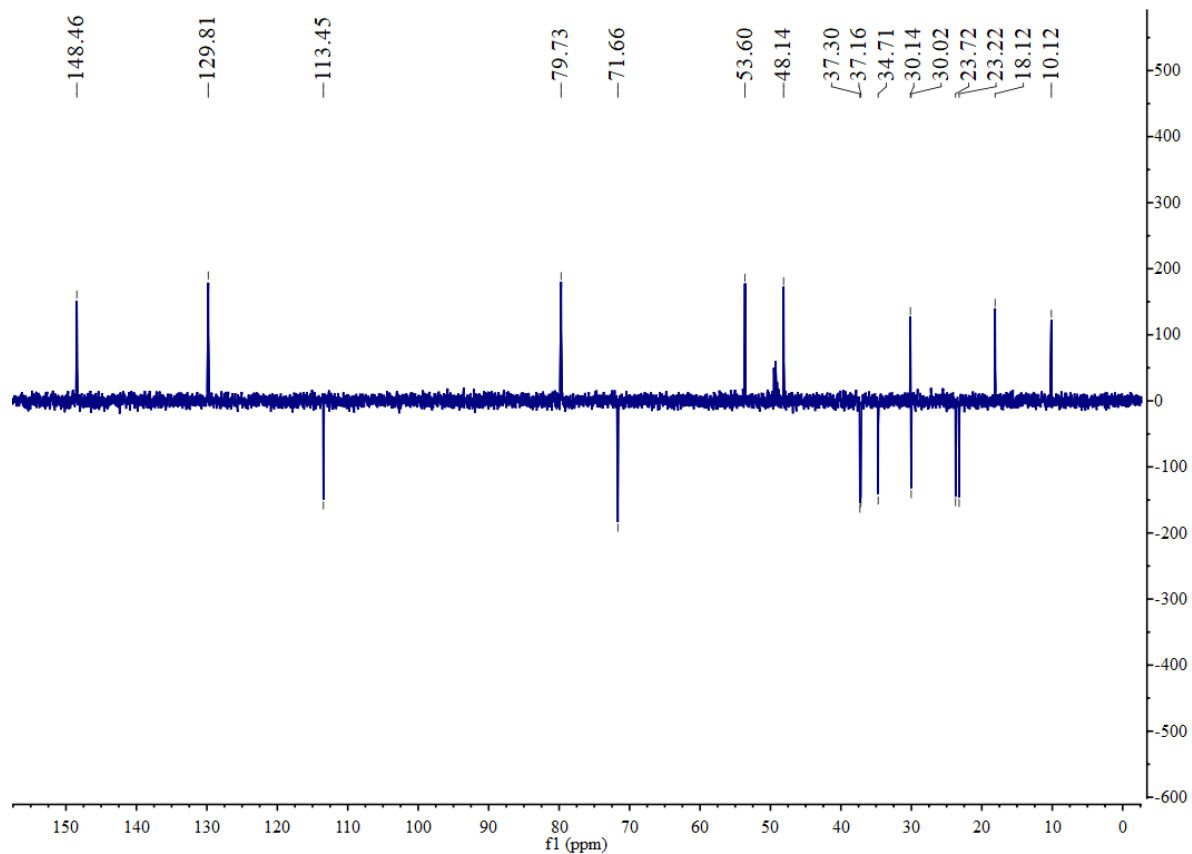

Figure S184 DEPT-135 NMR spectrum of **11a** in methanol- $d_4$  (100 MHz).

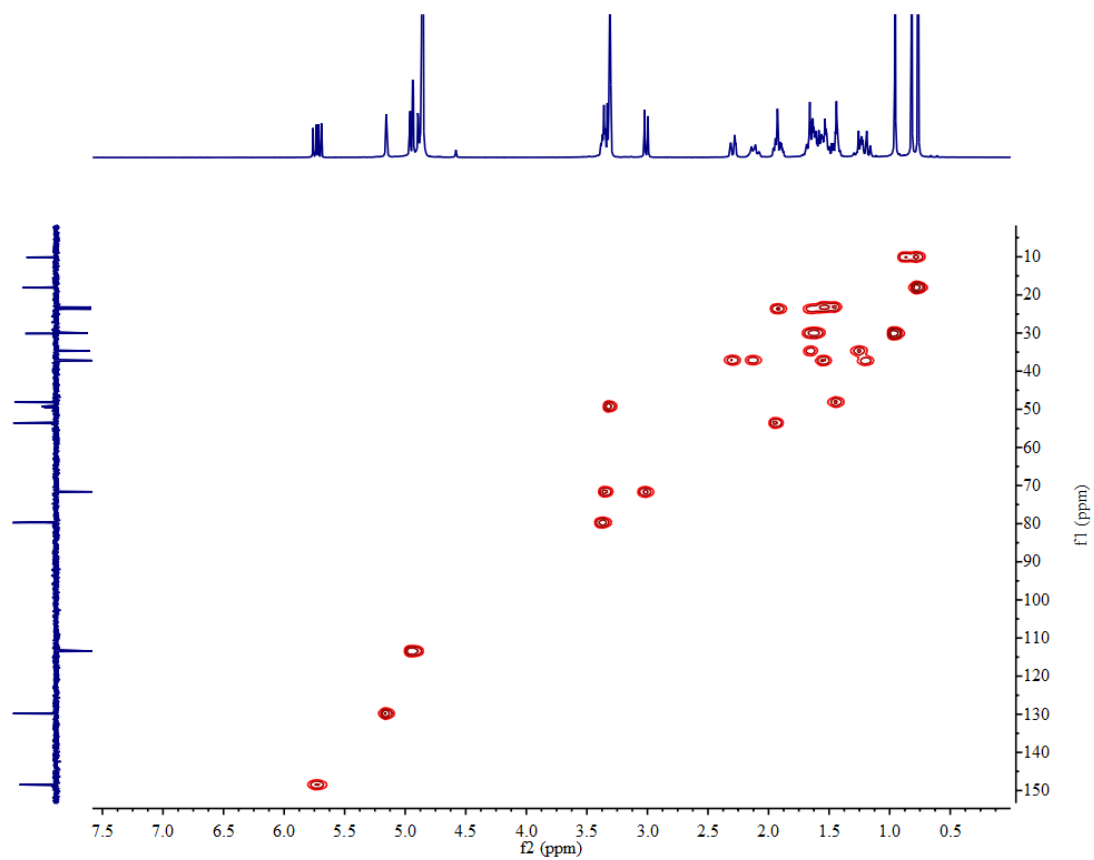

Figure S185 HSQC spectrum of **11a** in methanol- $d_4$  (400 MHz).

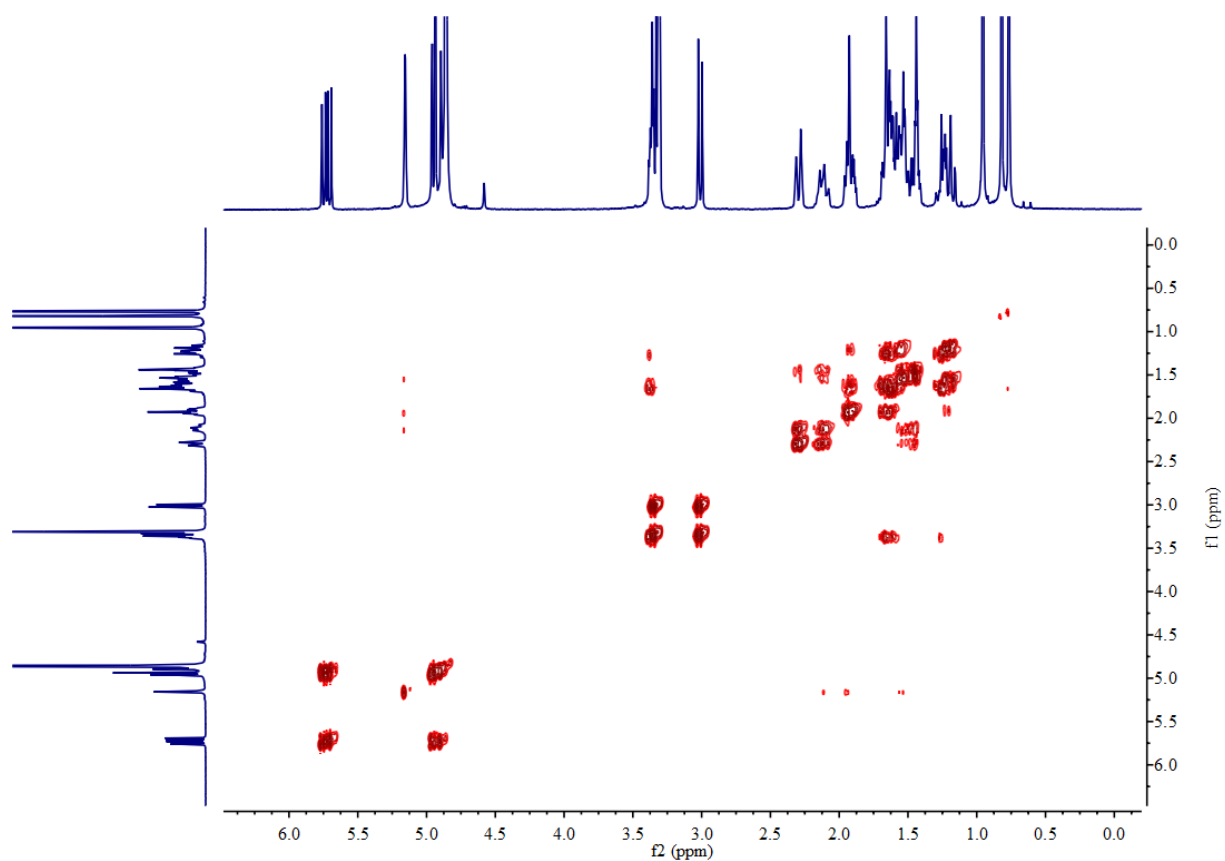

Figure S186  $^1\text{H}$ - $^1\text{H}$  COSY spectrum of **11a** in methanol- $d_4$  (400 MHz).

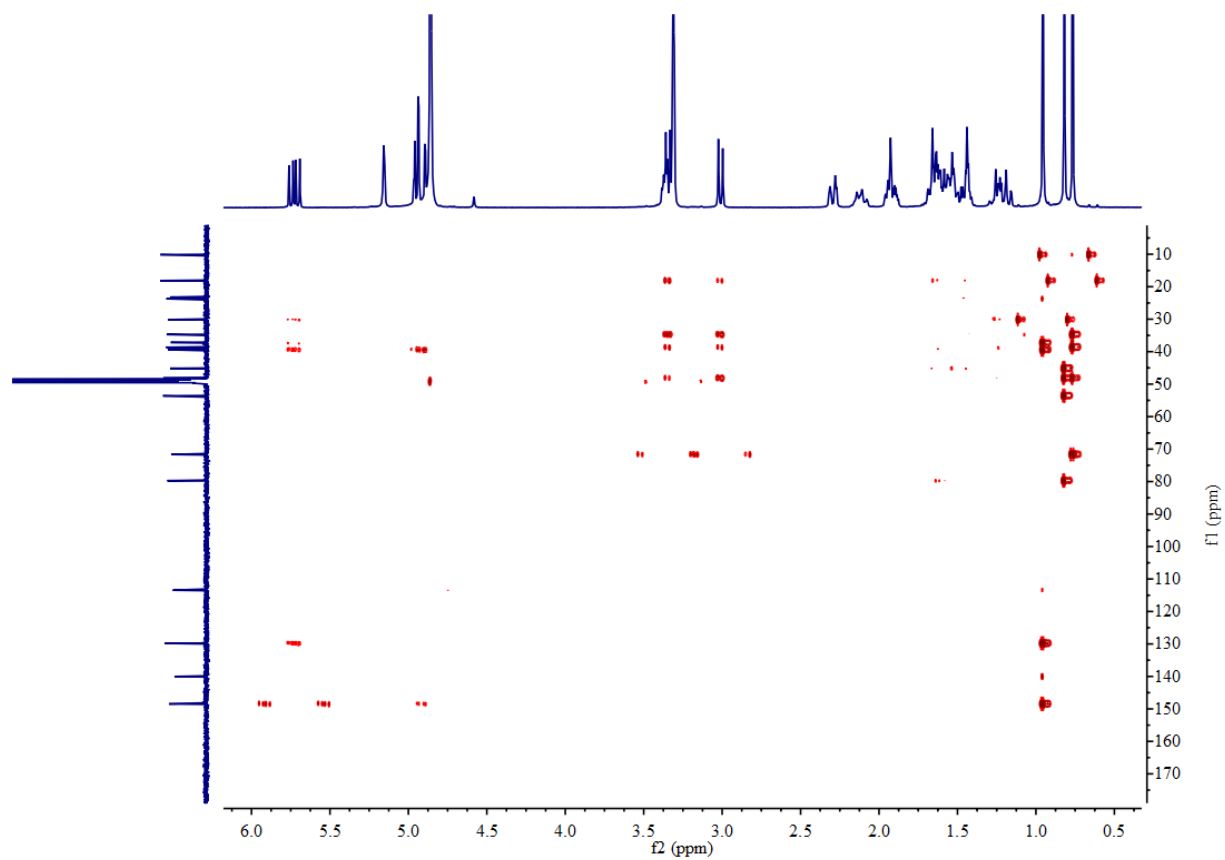

Figure S187 HMBC spectrum of **11a** in methanol- $d_4$  (400 MHz).

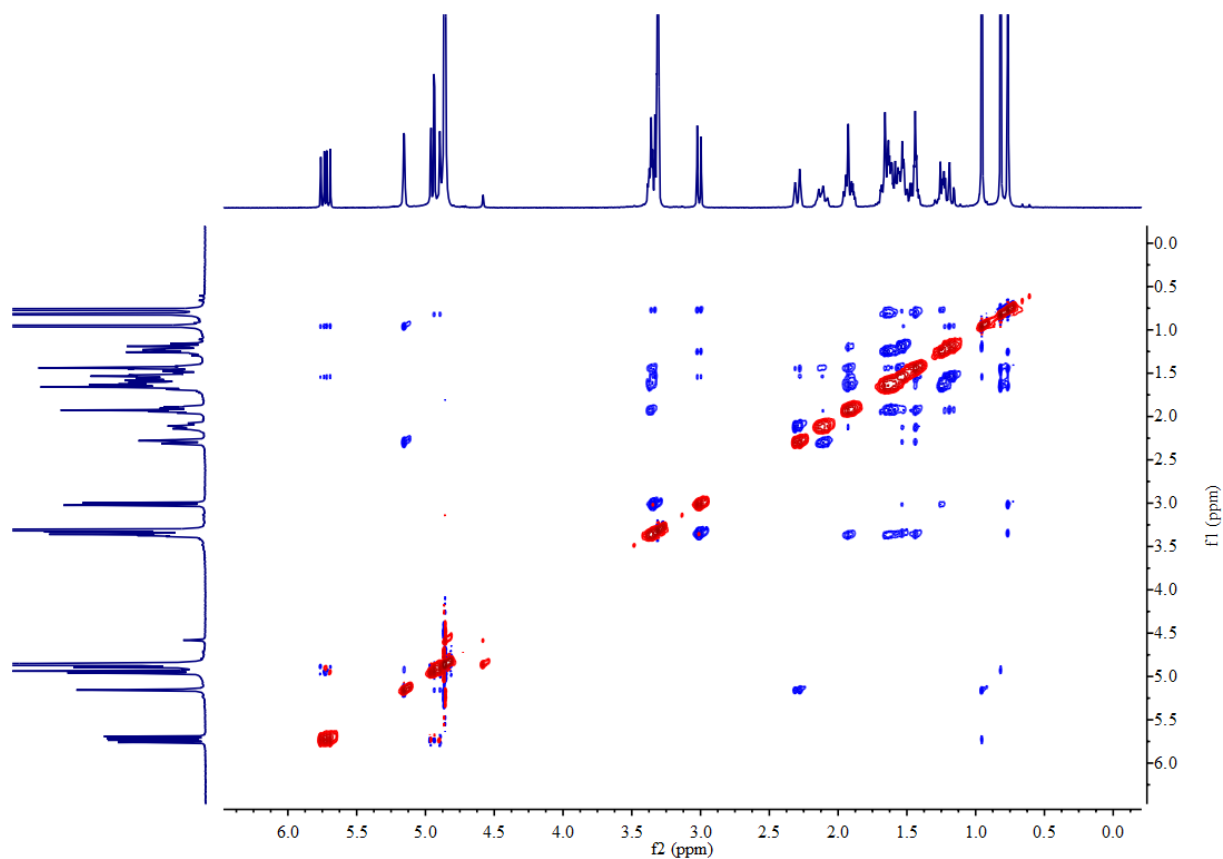

Figure S188 NOESY spectrum of **11a** in methanol- $d_4$  (400 MHz).

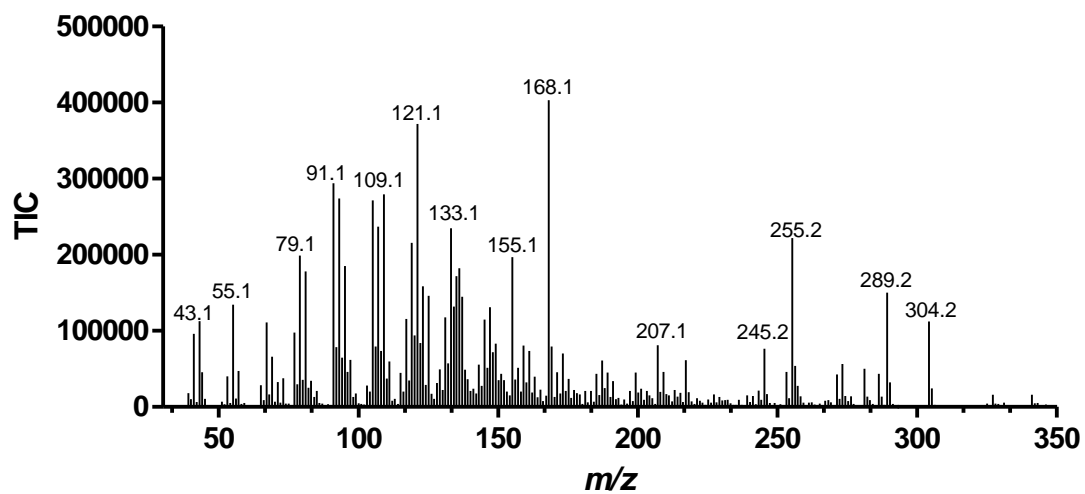

Figure S189 EI mass spectrum of **11a**.

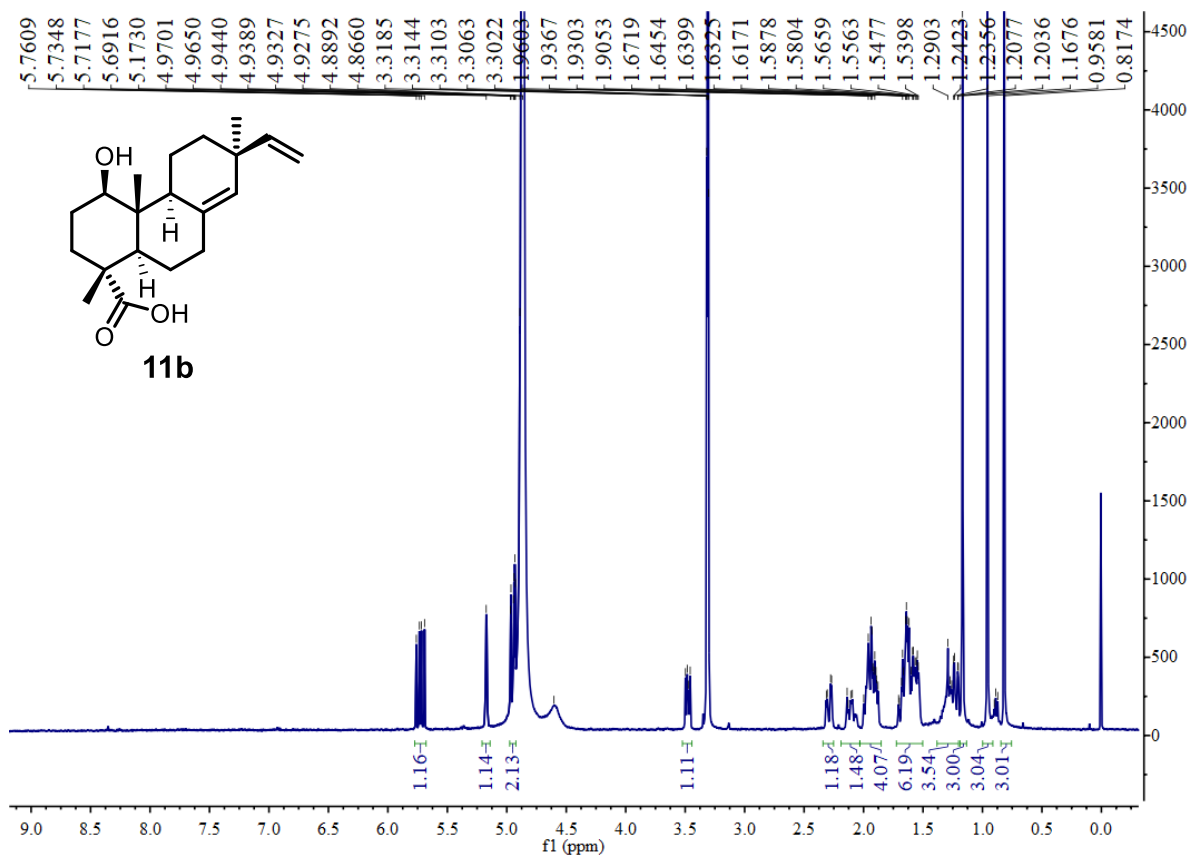

**Figure S190**  $^1\text{H}$  NMR spectrum of **11b** in methanol- $d_4$  (400 MHz).

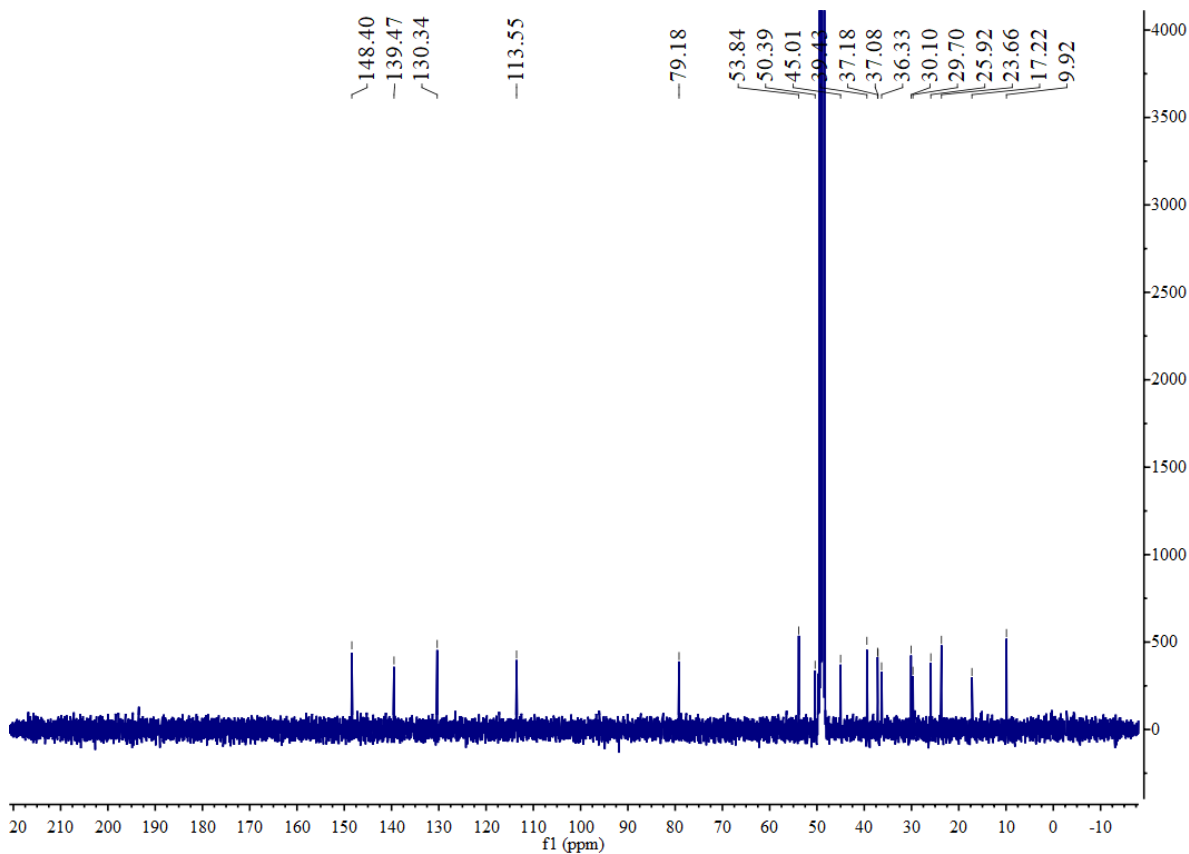

**Figure S191**  $^{13}\text{C}$  NMR spectrum of **11b** in methanol- $d_4$  (100 MHz).



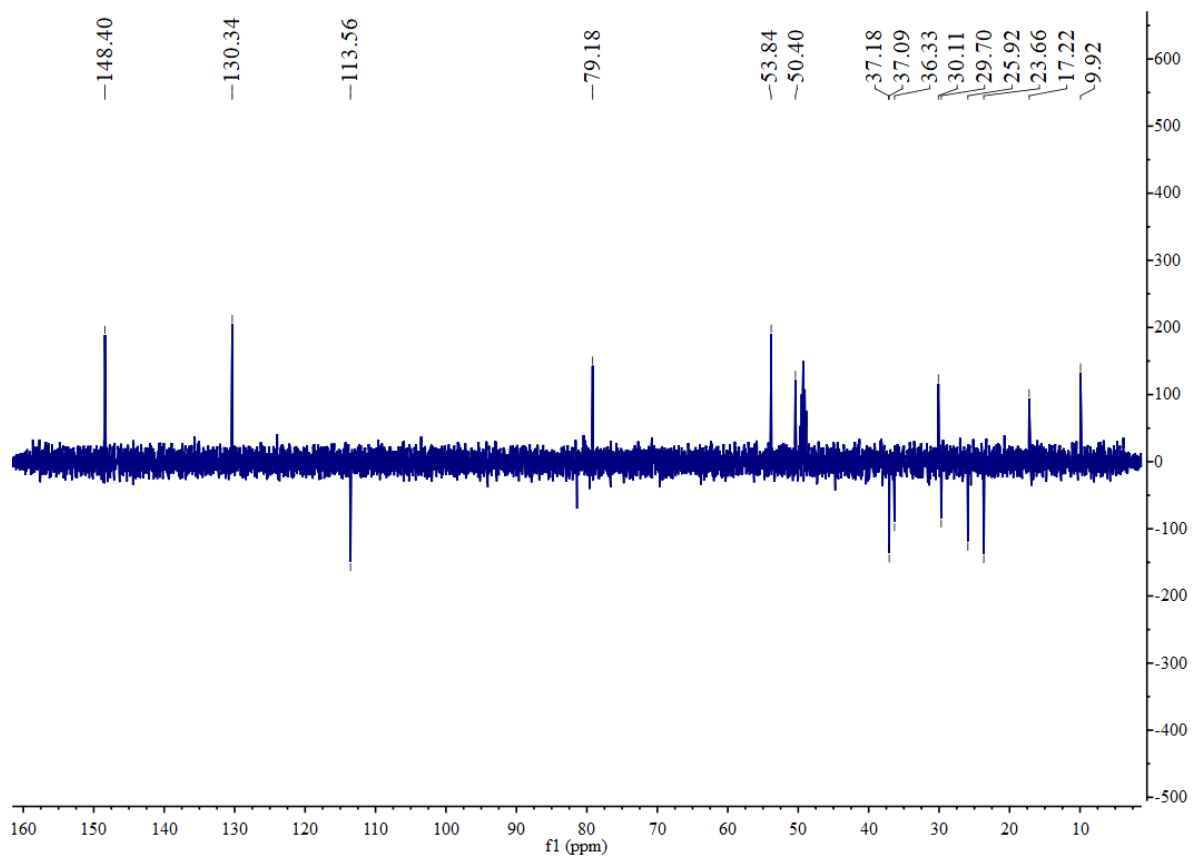

**Figure S192** DEPT-135 NMR spectrum of **11b** in methanol-*d*<sub>4</sub> (100 MHz).

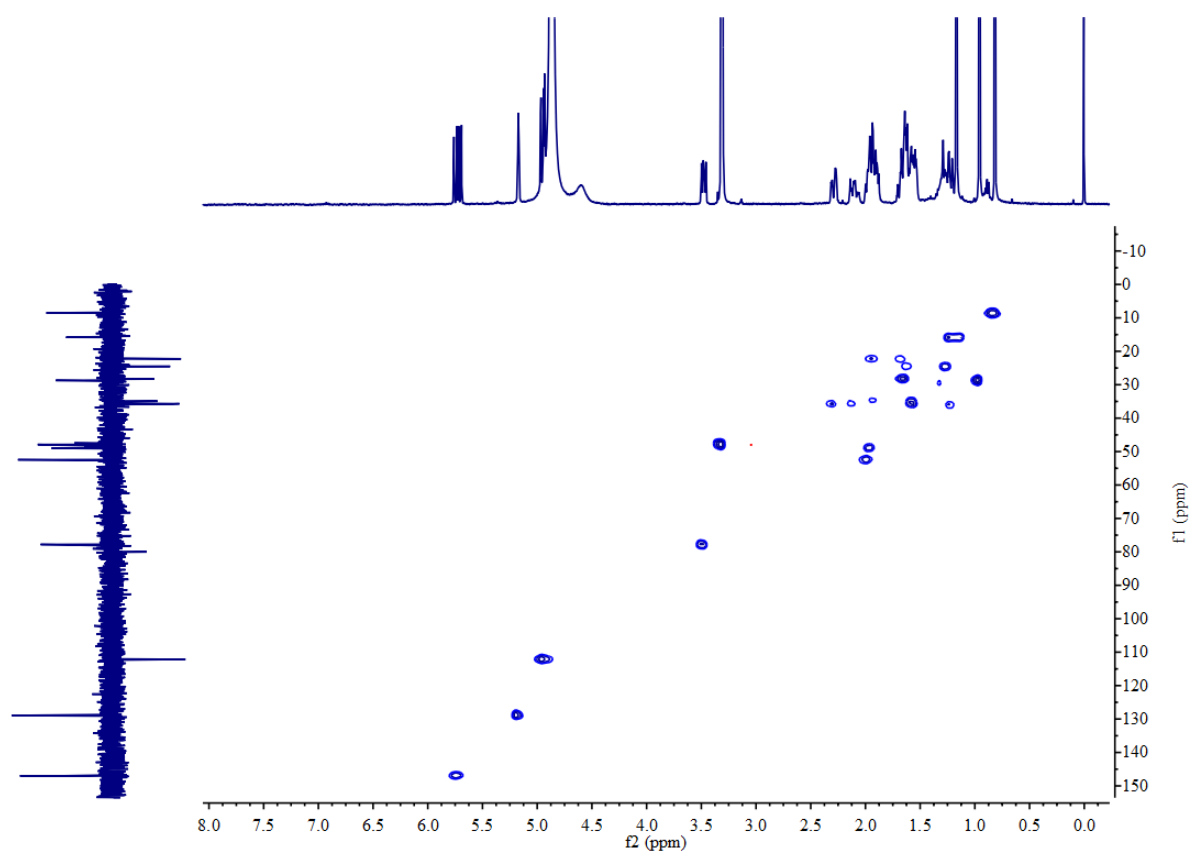

**Figure S193** HSQC spectrum of **11b** in methanol-*d*<sub>4</sub> (400 MHz).

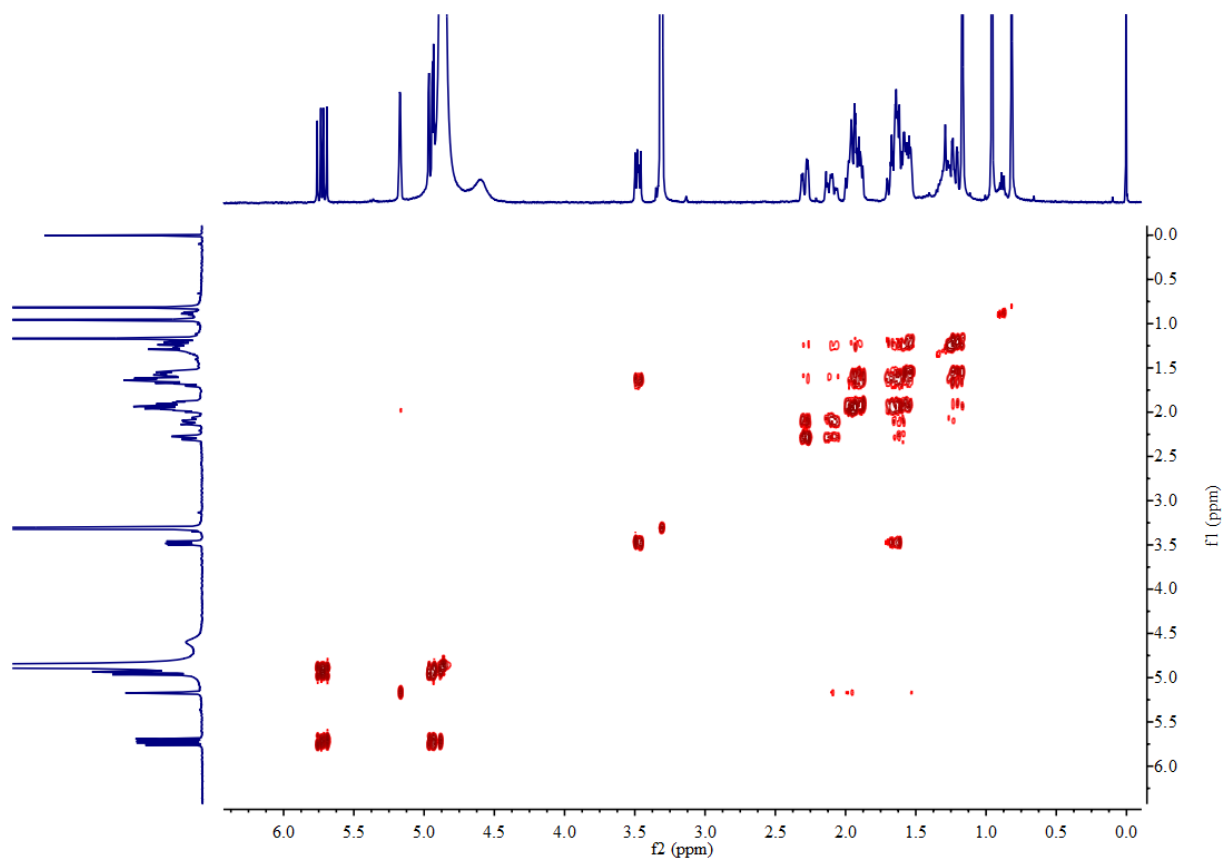

Figure S194  $^1\text{H}$ - $^1\text{H}$  COSY spectrum of **11b** in methanol- $d_4$  (400 MHz).

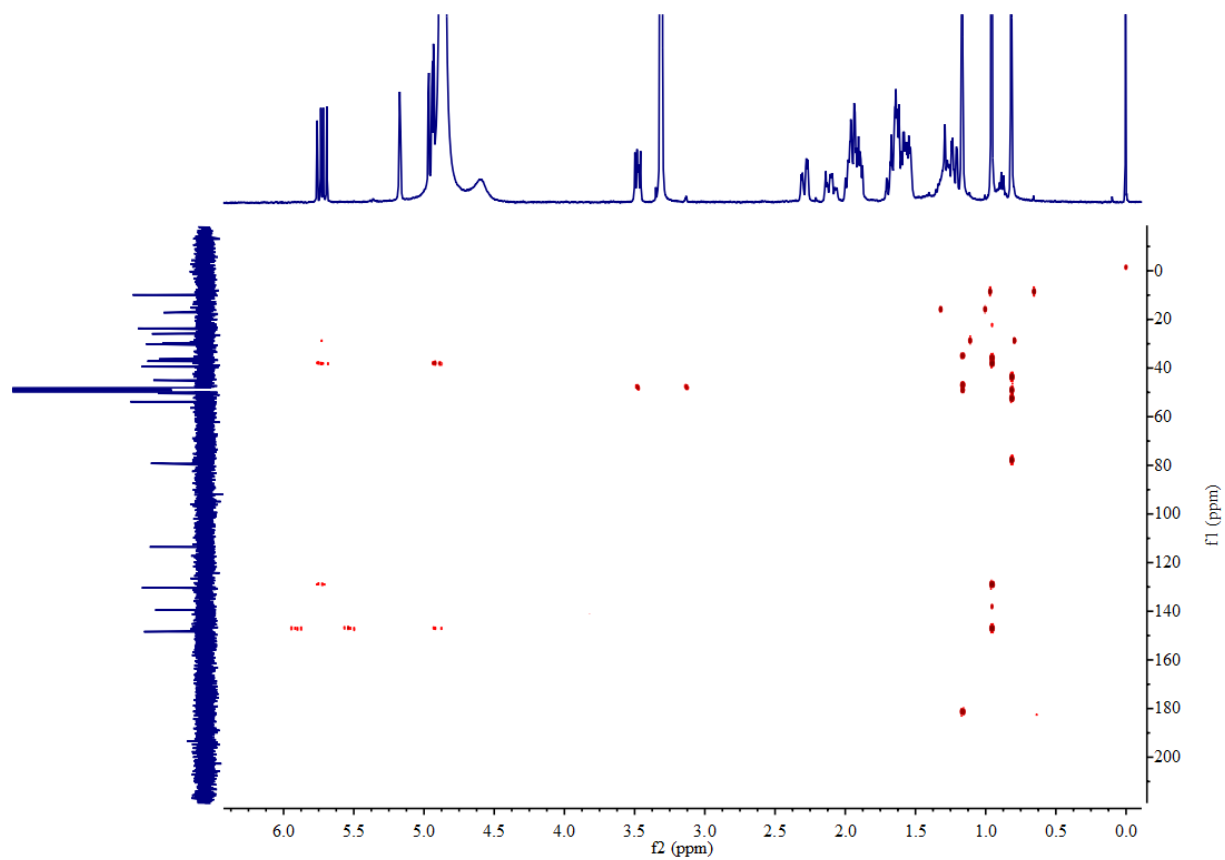

Figure S195 HMBC spectrum of **11b** in methanol- $d_4$  (400 MHz).

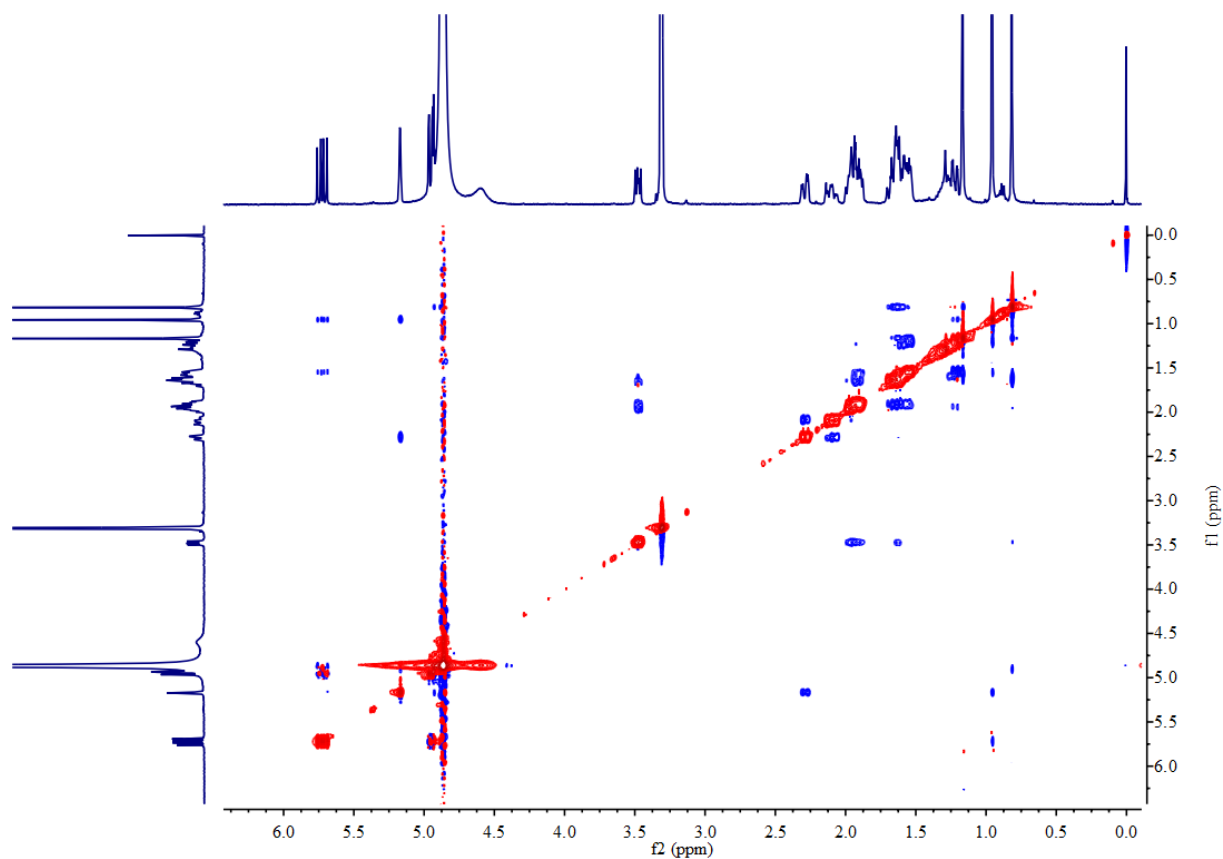

Figure S196 NOESY spectrum of **11b** in methanol- $d_4$  (400 MHz).

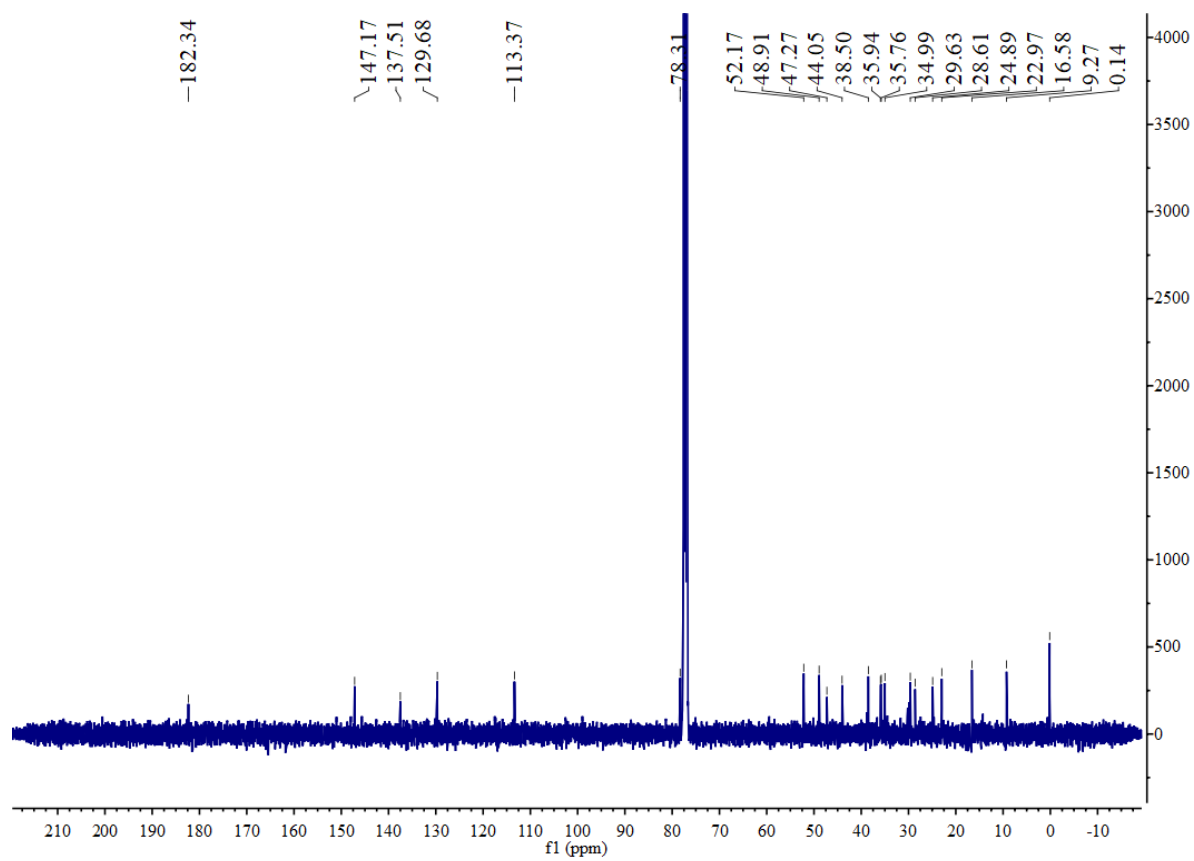

Figure S197  $^{13}\text{C}$  NMR spectrum of **11b** in  $\text{CDCl}_3$  (100 MHz).

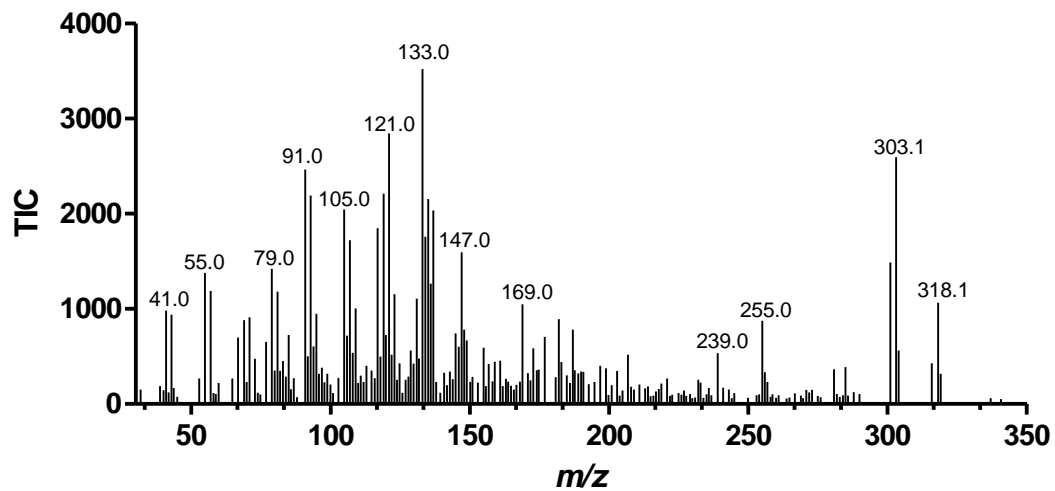

Figure S198 EI mass spectrum of **11b**.

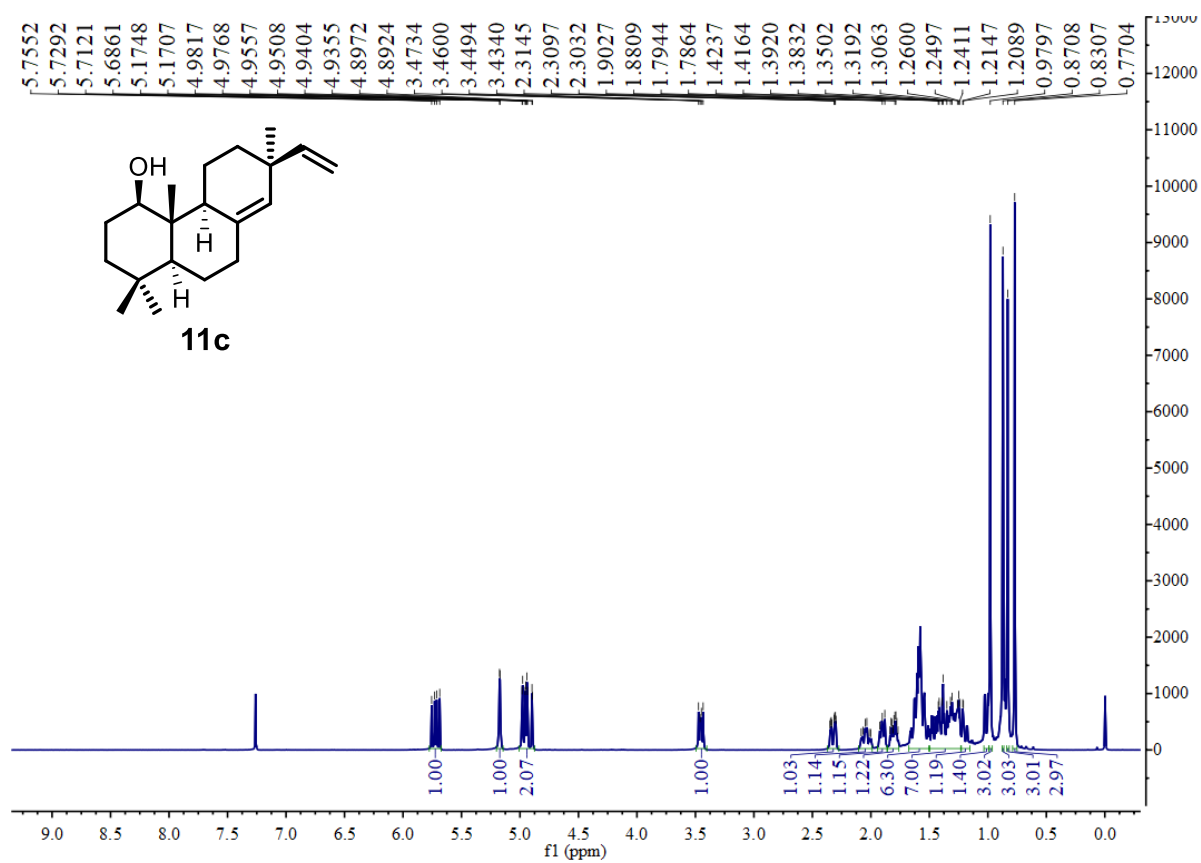

Figure S199  $^1\text{H}$  NMR spectrum of **11c** in  $\text{CDCl}_3$  (400 MHz).

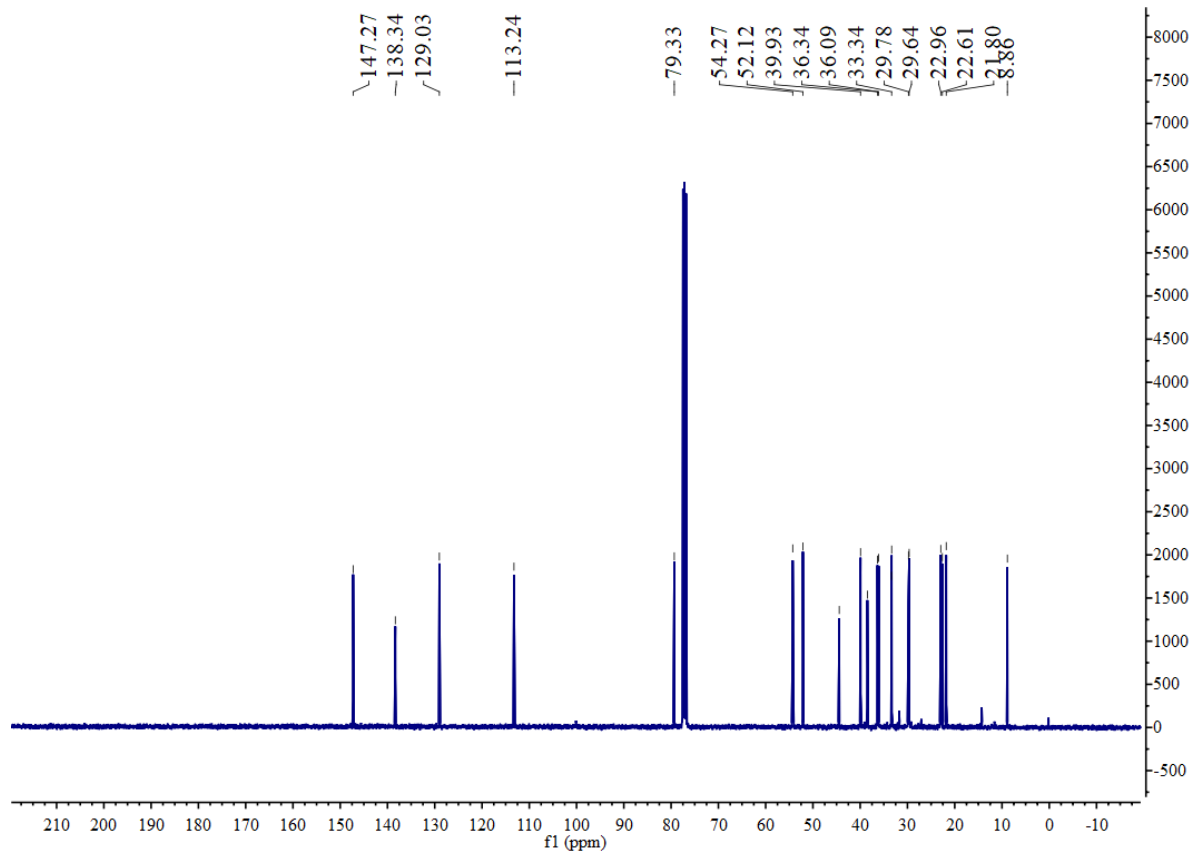

Figure S200  $^{13}\text{C}$  NMR spectrum of **11c** in  $\text{CDCl}_3$  (100 MHz).

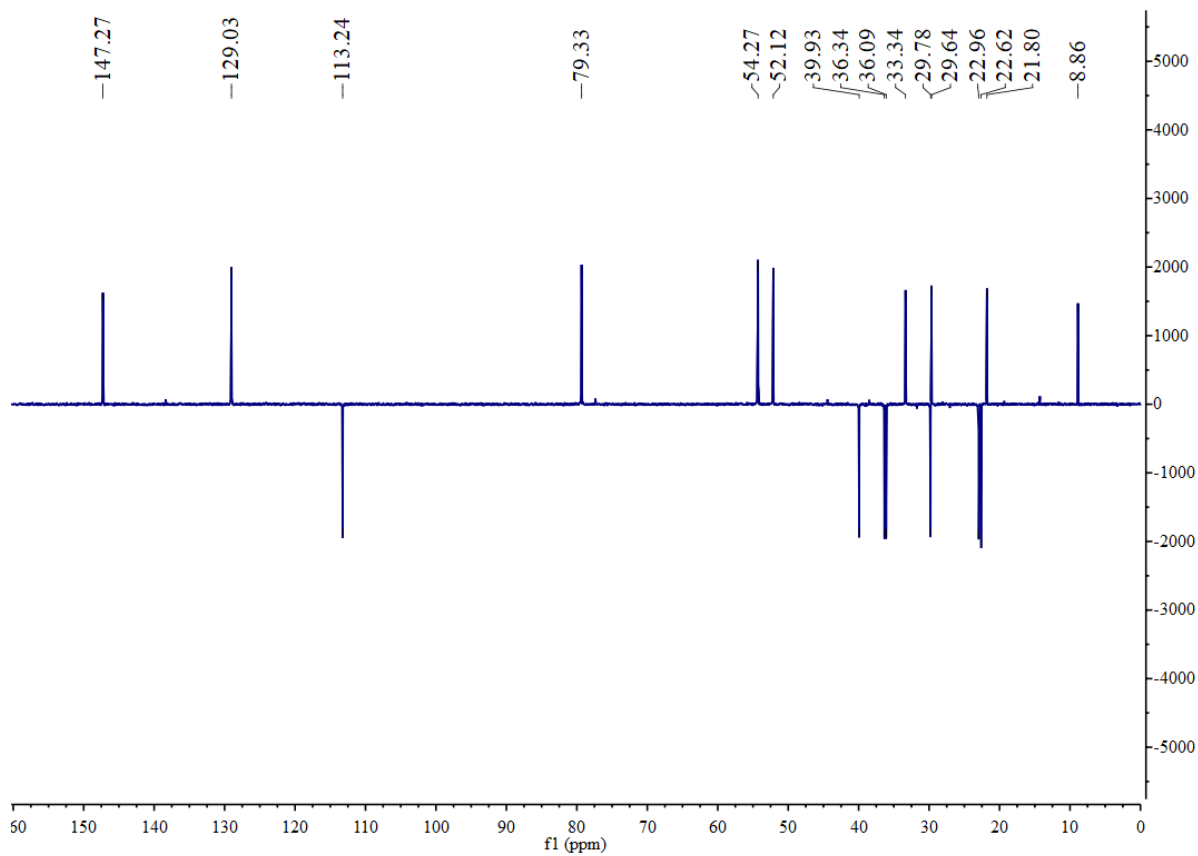

Figure S201 DEPT-135 NMR spectrum of **11c** in  $\text{CDCl}_3$  (100 MHz).

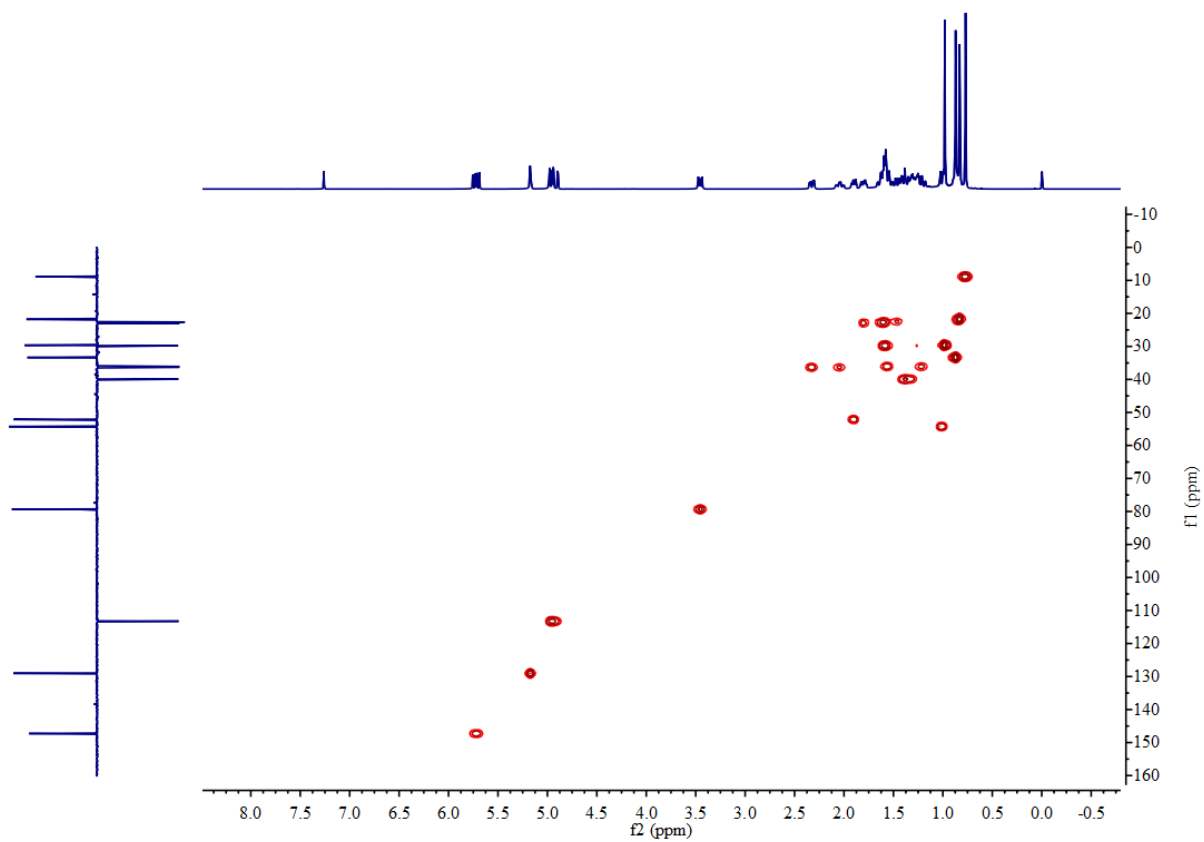

Figure S202 HSQC spectrum of **11c** in  $\text{CDCl}_3$  (400 MHz).

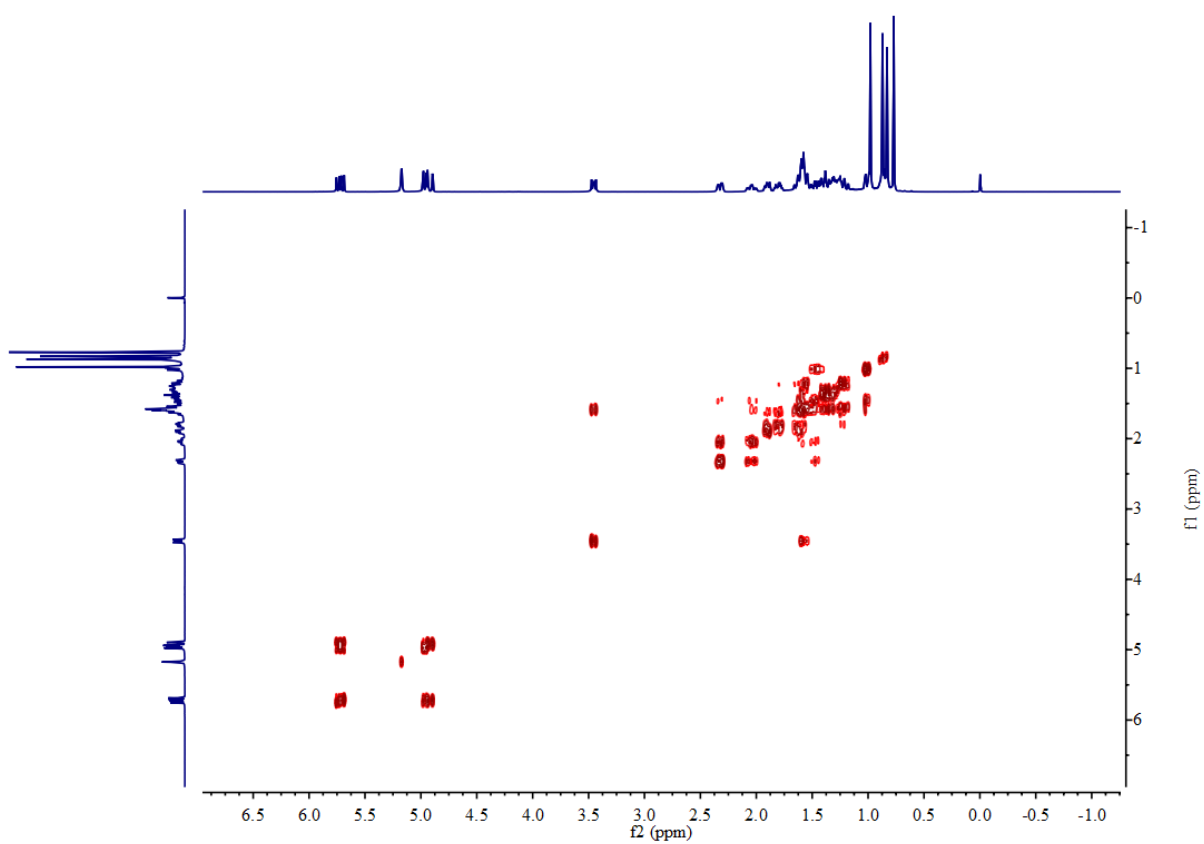

Figure S203  $^1\text{H}$ - $^1\text{H}$  COSY spectrum of **11c** in  $\text{CDCl}_3$  (400 MHz).

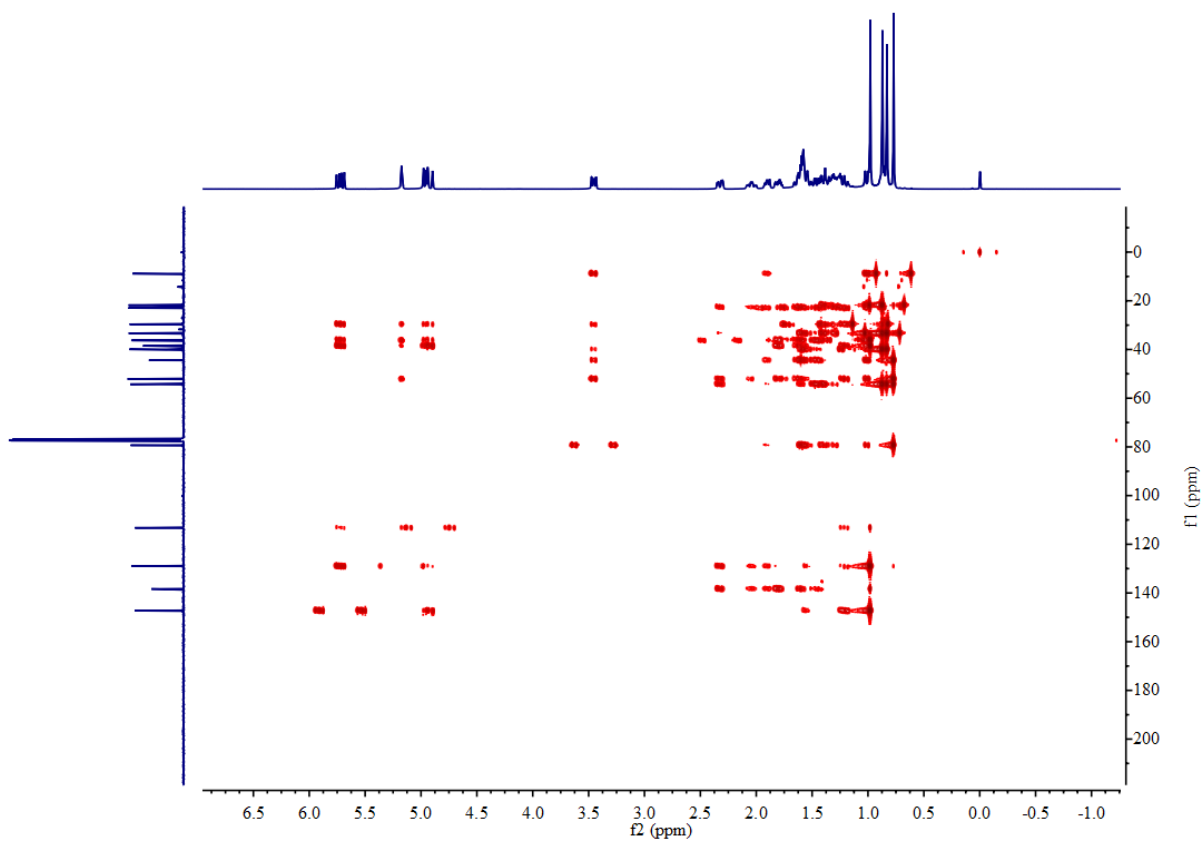

Figure S204 HMBC spectrum of **11c** in  $\text{CDCl}_3$  (400 MHz).

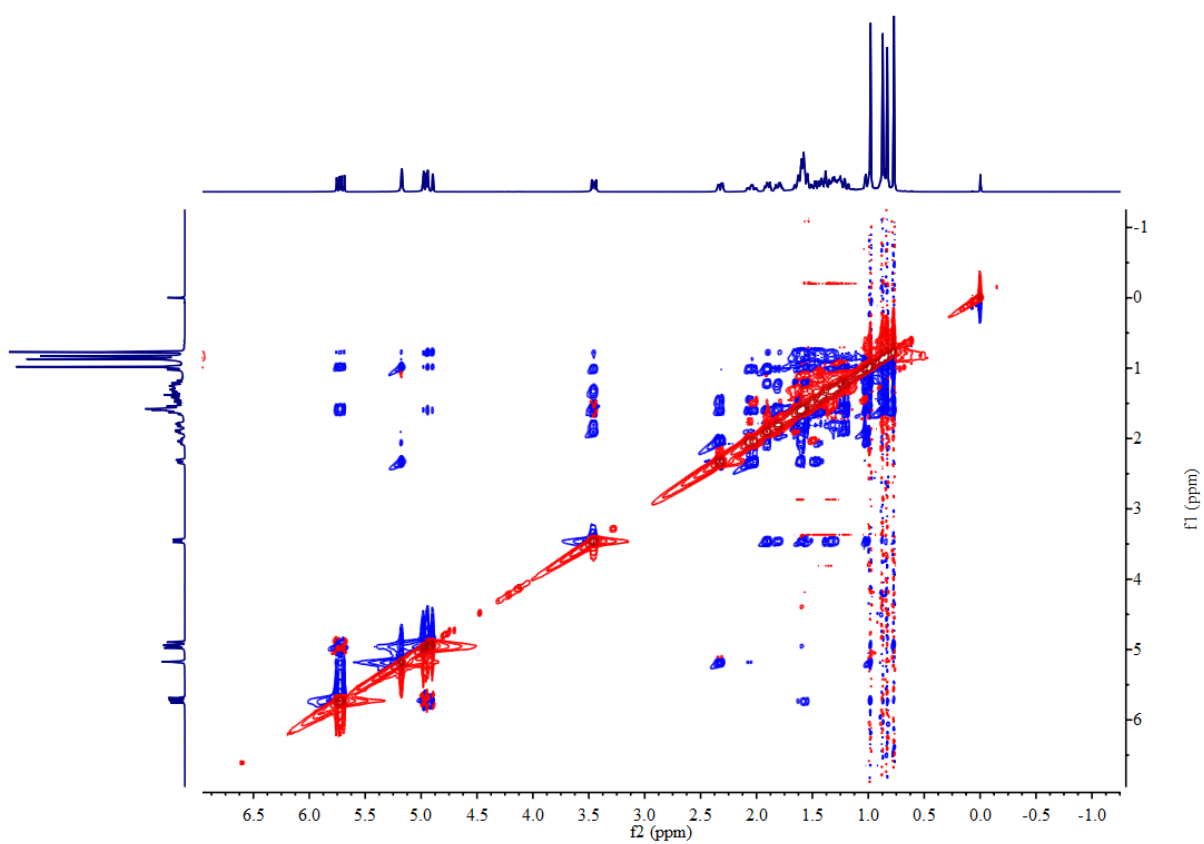

Figure S205 NOESY spectrum of **11c** in  $\text{CDCl}_3$  (400 MHz).

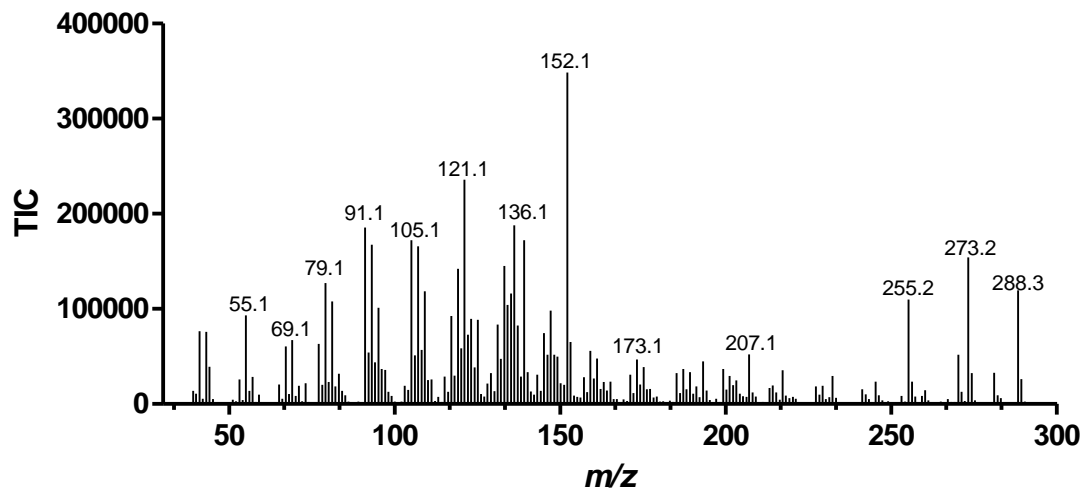

Figure S206 EI mass spectrum of 11c.

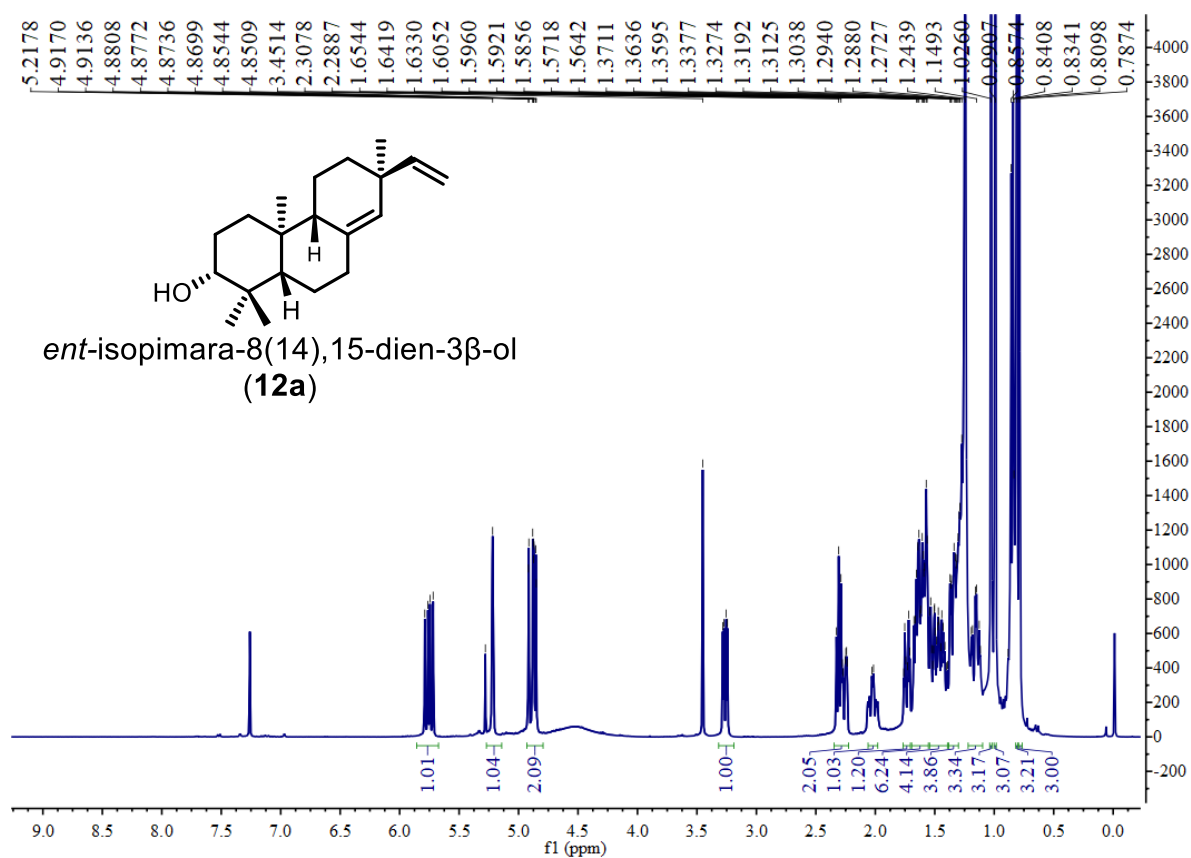

Figure S207 <sup>1</sup>H NMR spectrum of 12a in CDCl<sub>3</sub> (400 MHz).



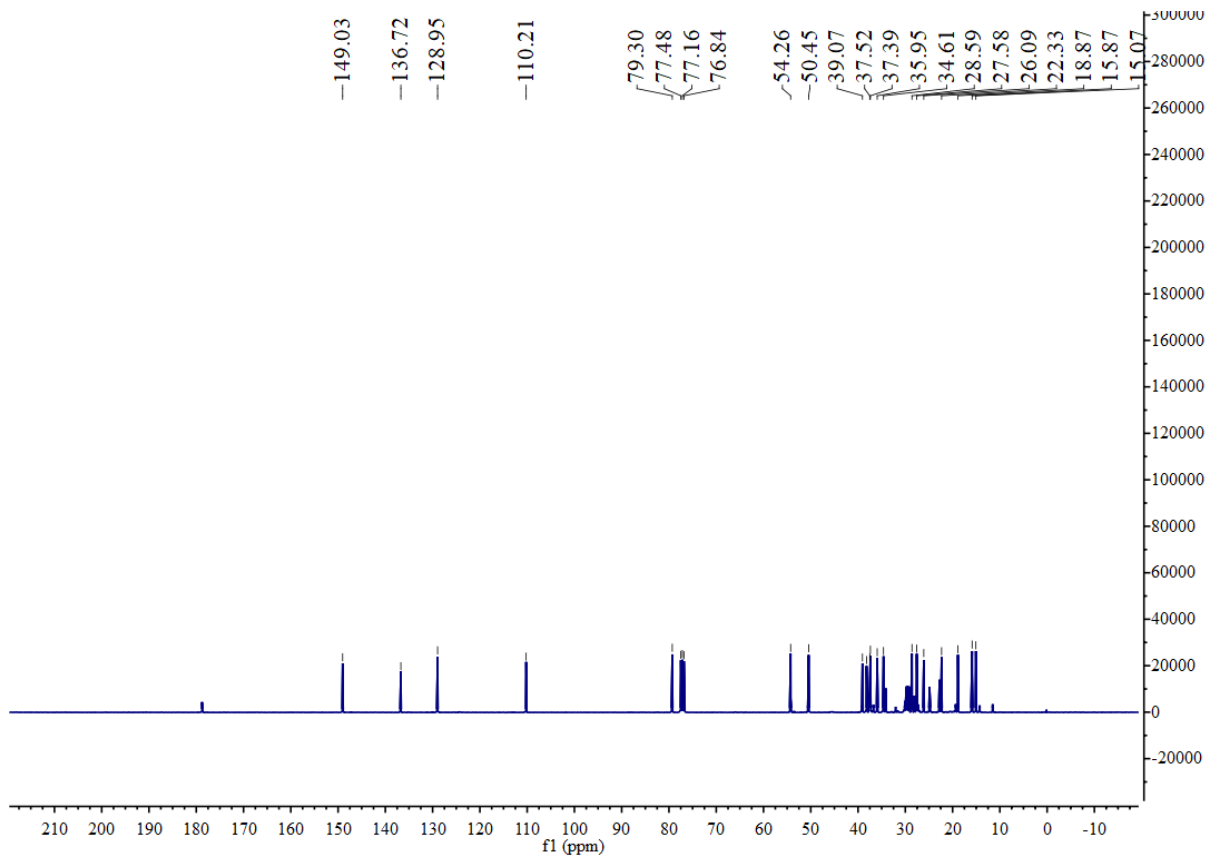

Figure S208  $^{13}\text{C}$  NMR spectrum of **12a** in  $\text{CDCl}_3$  (100 MHz).

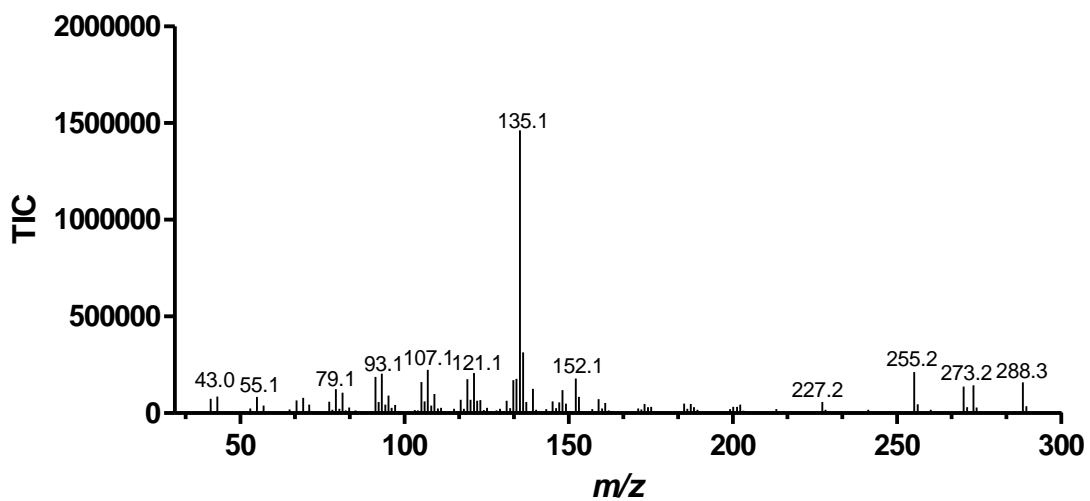

Figure S209 EI mass spectrum of **12a**.

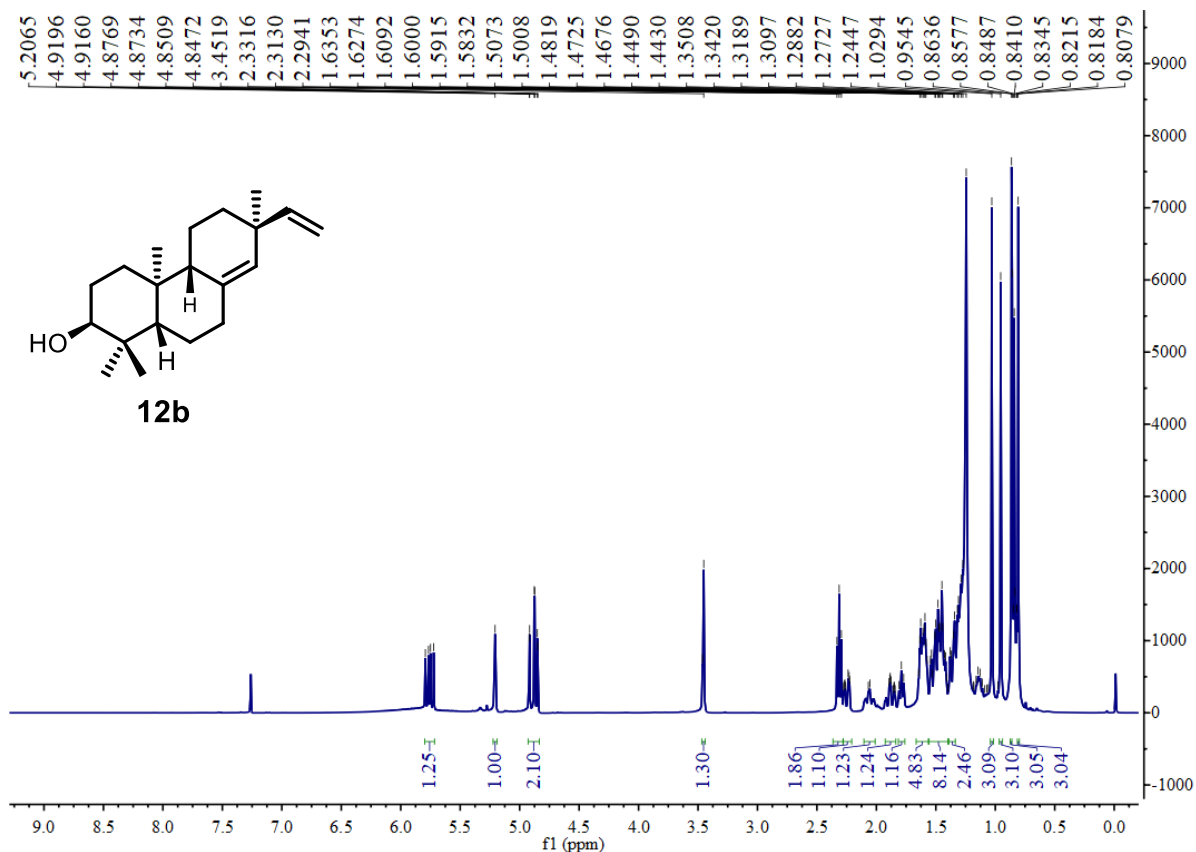

**Figure S210**  $^1\text{H}$  NMR spectrum of **12b** in  $\text{CDCl}_3$  (400 MHz).

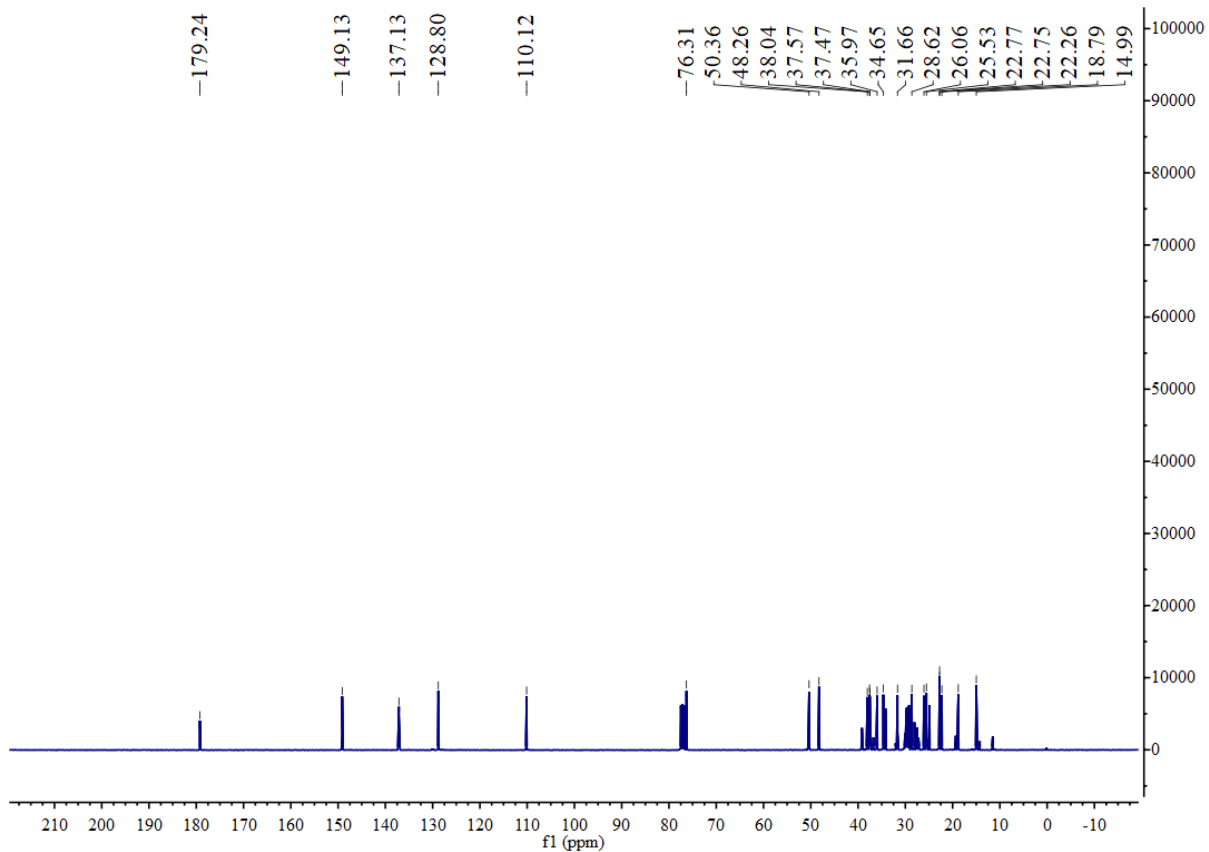

**Figure S211**  $^{13}\text{C}$  NMR spectrum of **12b** in  $\text{CDCl}_3$  (100 MHz).

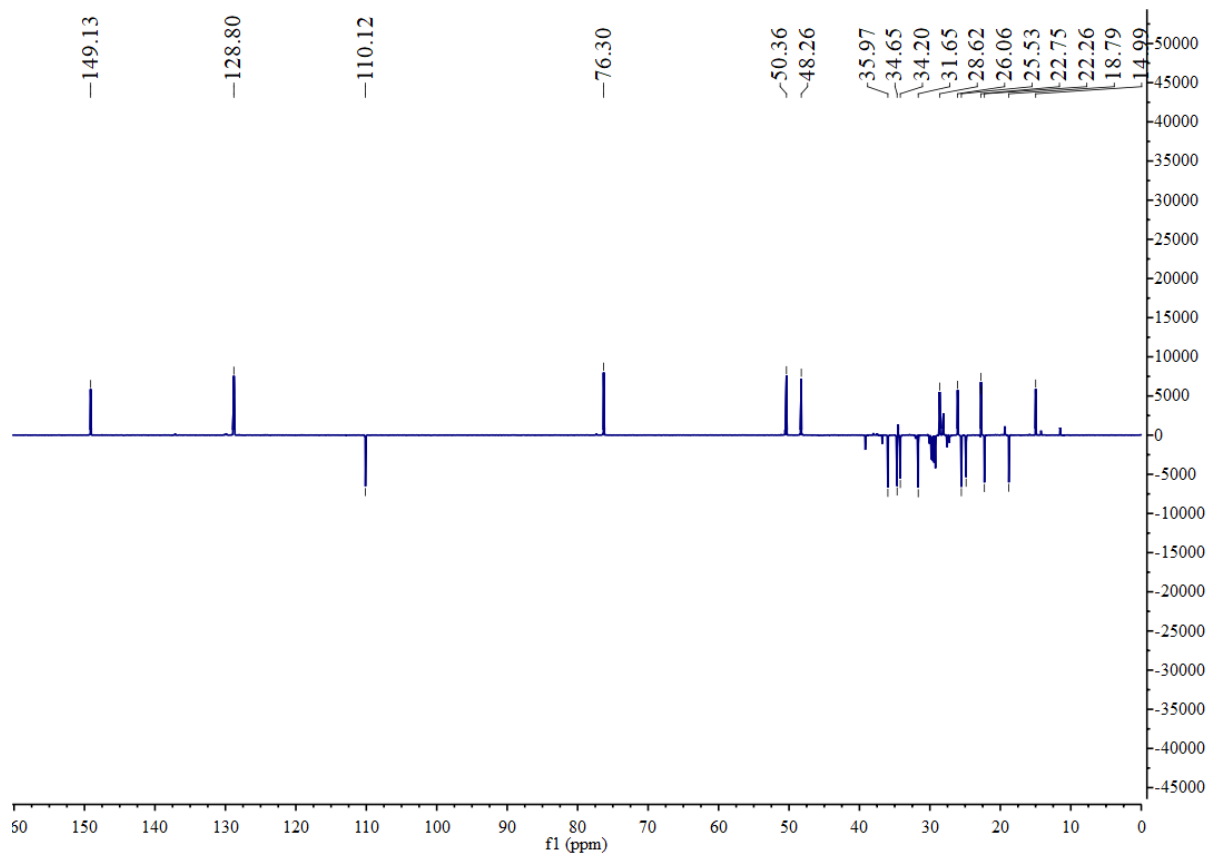

Figure S212 DEPT-135 NMR spectrum of **12b** in  $\text{CDCl}_3$  (100 MHz).

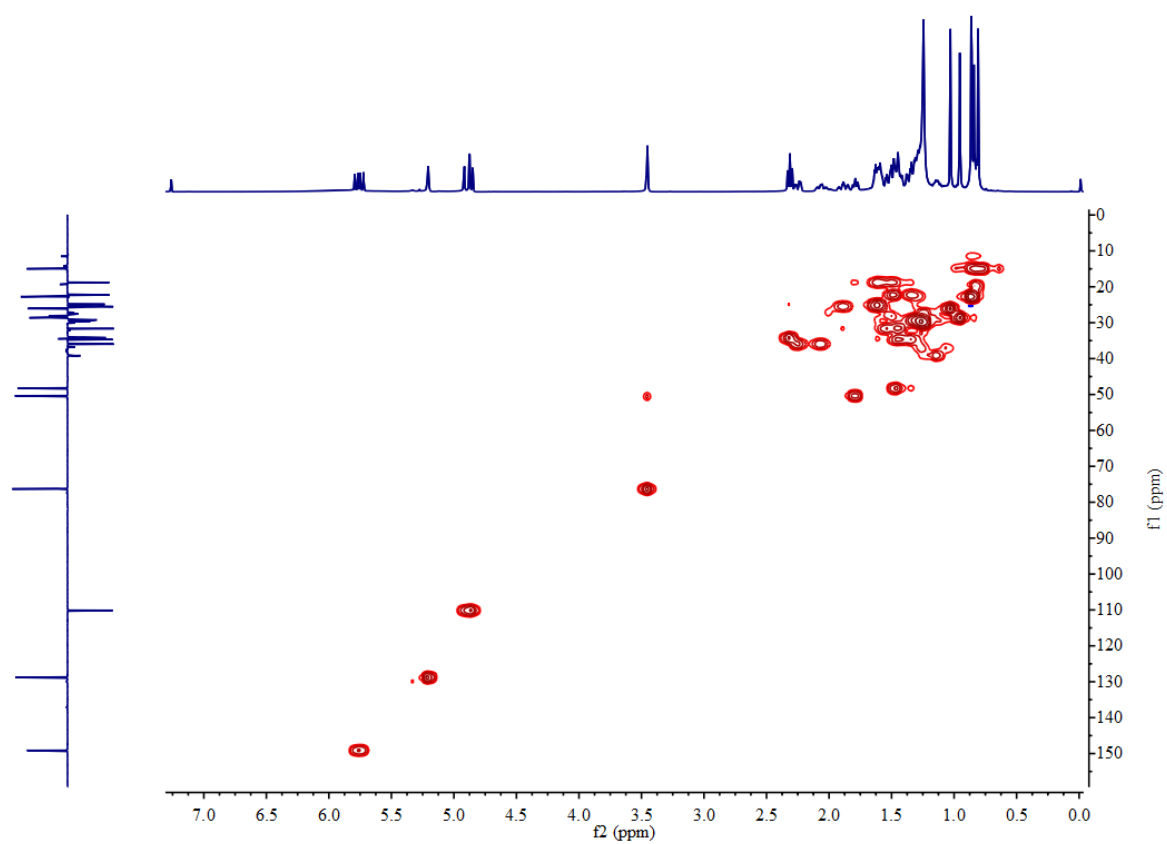

Figure S213 HSQC spectrum of **12b** in  $\text{CDCl}_3$  (400 MHz).

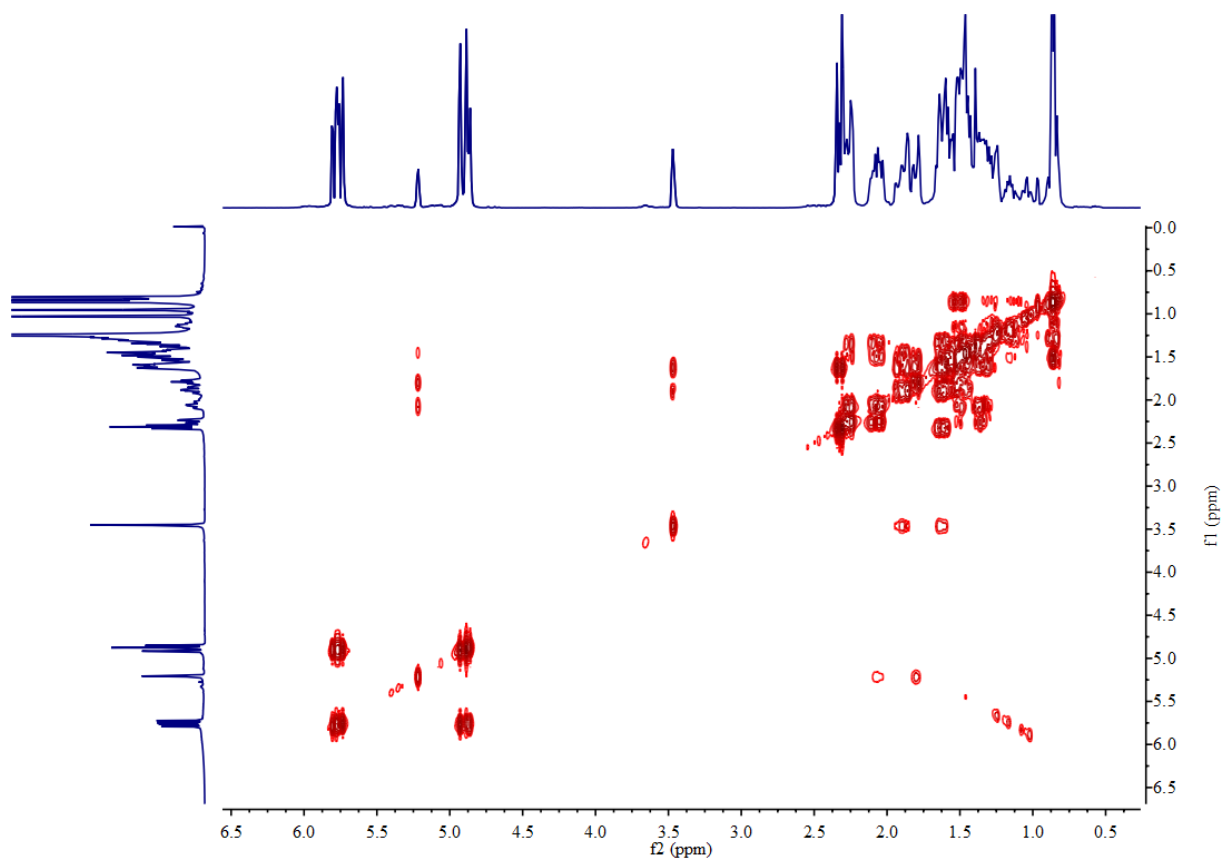

Figure S214  $^1\text{H}$ - $^1\text{H}$  COSY spectrum of **12b** in  $\text{CDCl}_3$  (400 MHz).

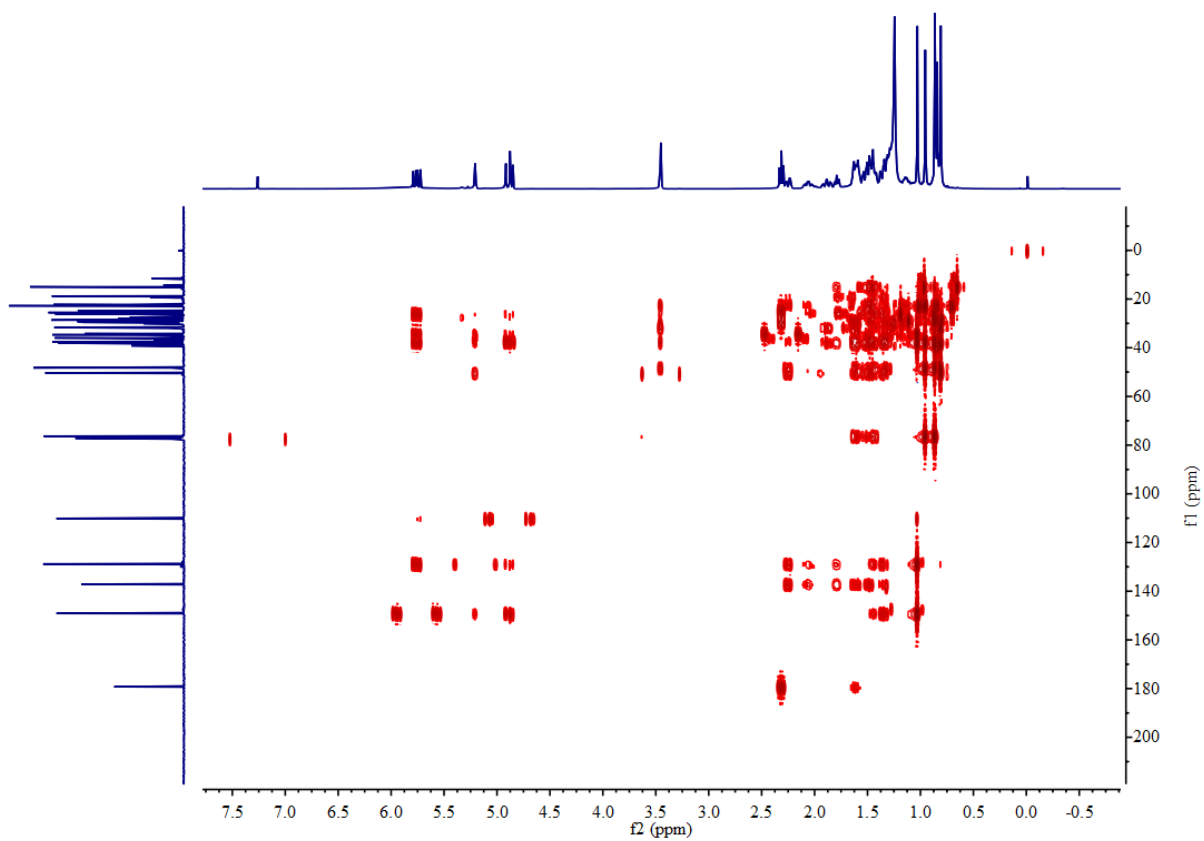

Figure S215 HMBC spectrum of **12b** in  $\text{CDCl}_3$  (400 MHz).

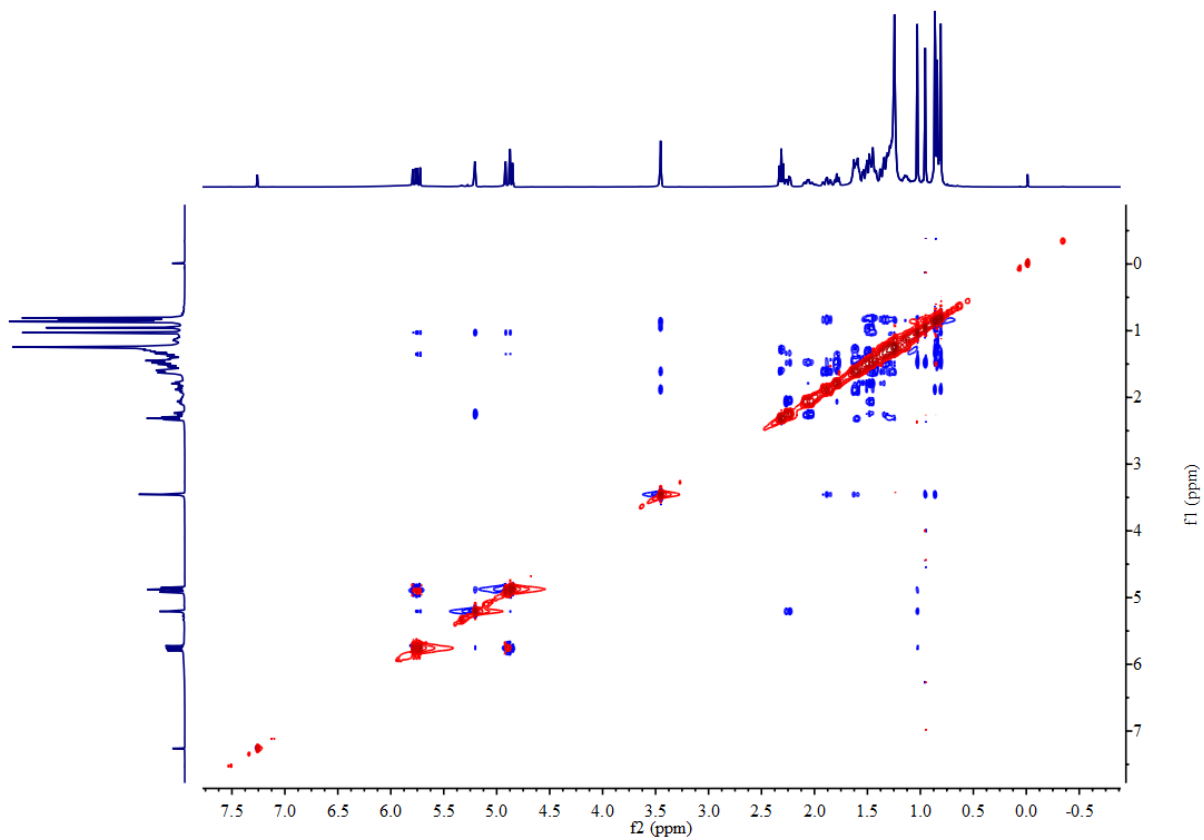

Figure S216 NOESY spectrum of **12b** in  $\text{CDCl}_3$  (400 MHz).

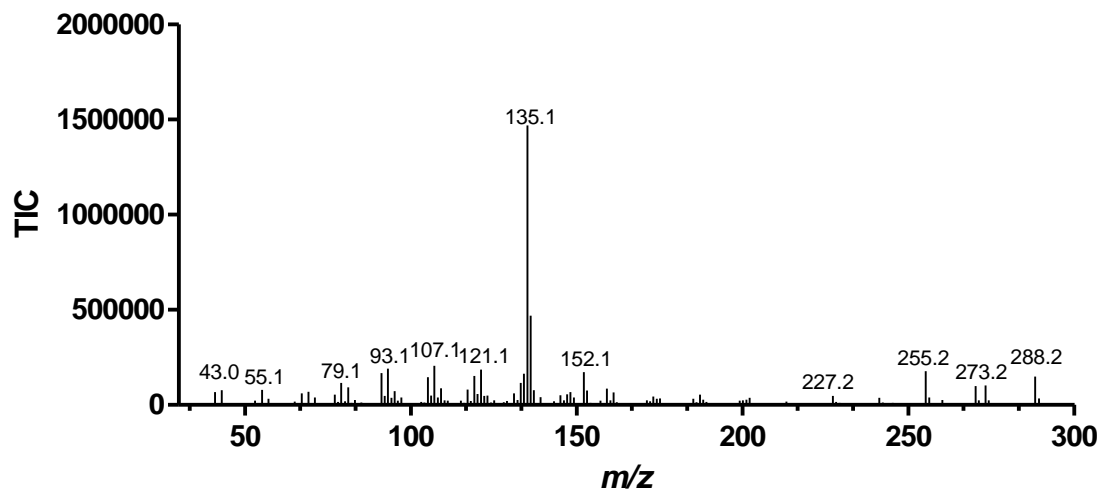

Figure S217 EI mass spectrum of **12b**.

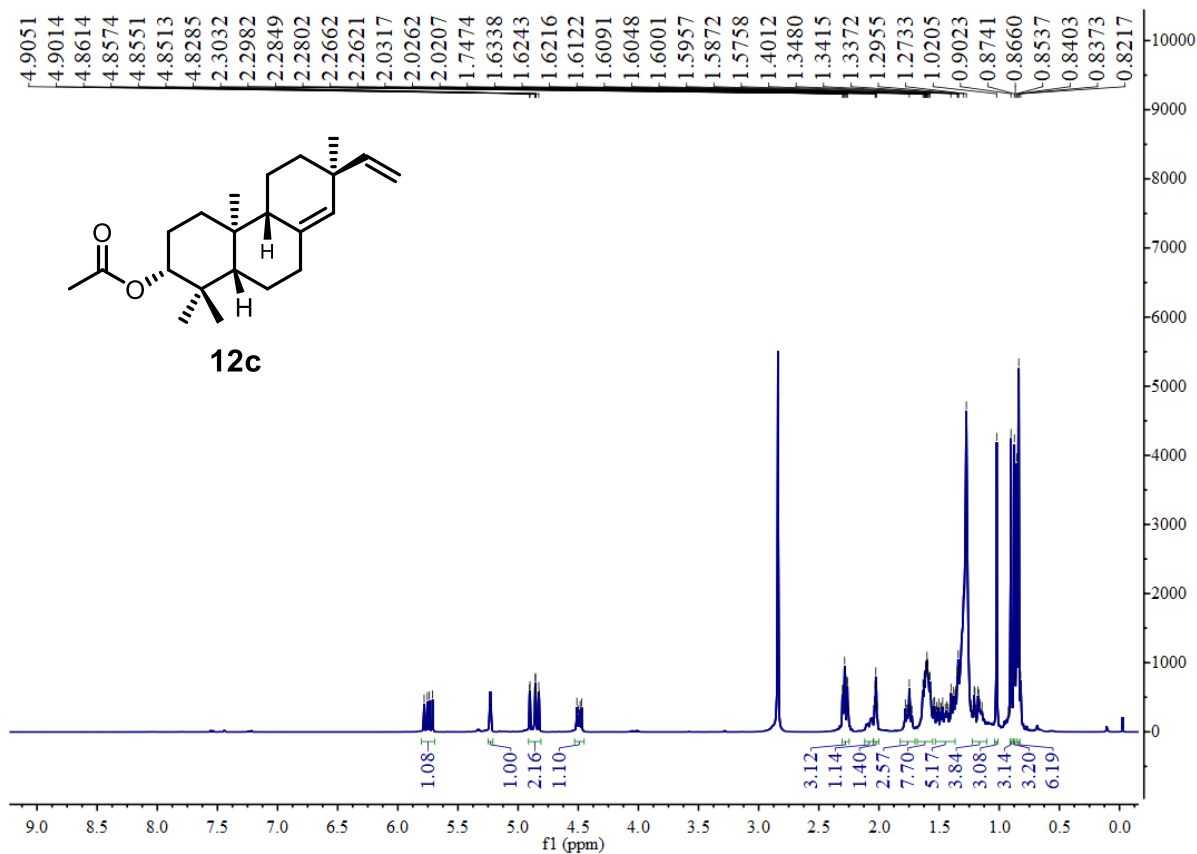

Figure S218 <sup>1</sup>H NMR spectrum of **12c** in acetone-*d*<sub>6</sub> (400 MHz).

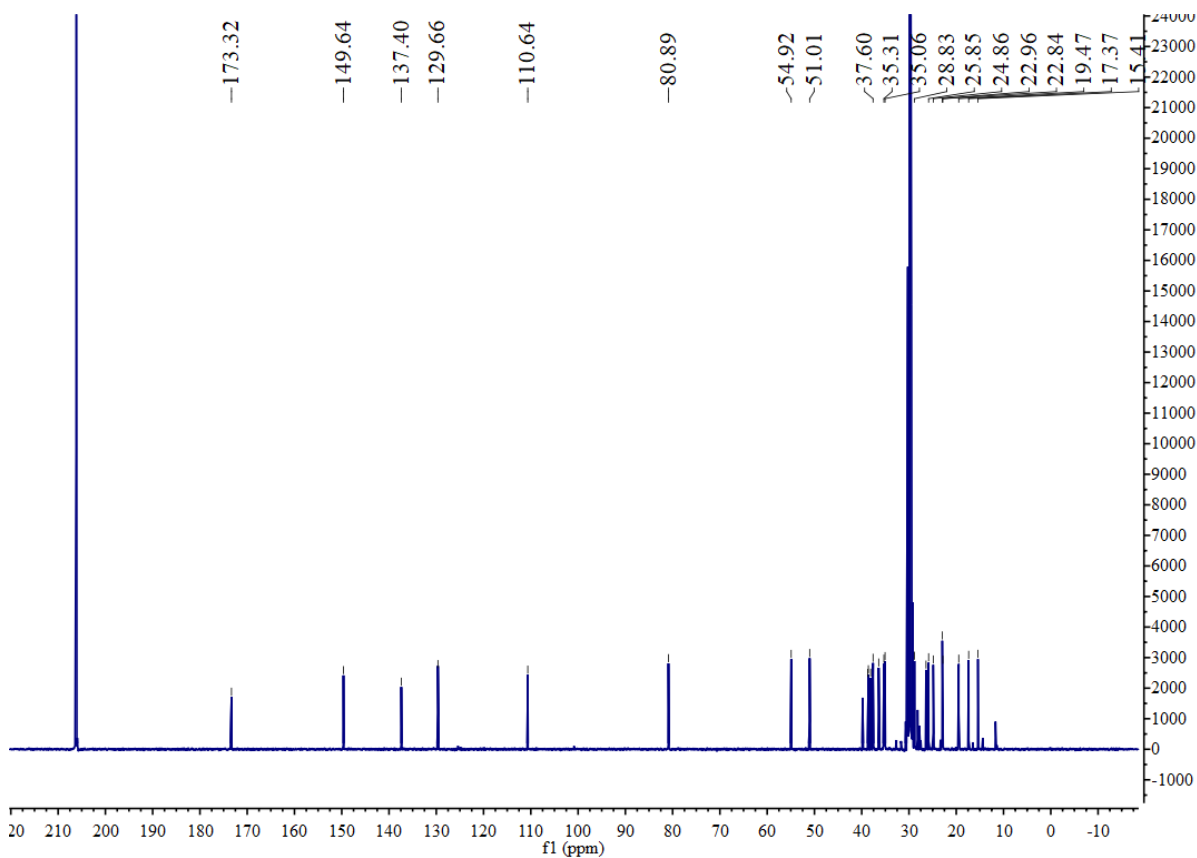

Figure S219 <sup>13</sup>C NMR spectrum of **12c** in acetone-*d*<sub>6</sub> (100 MHz).

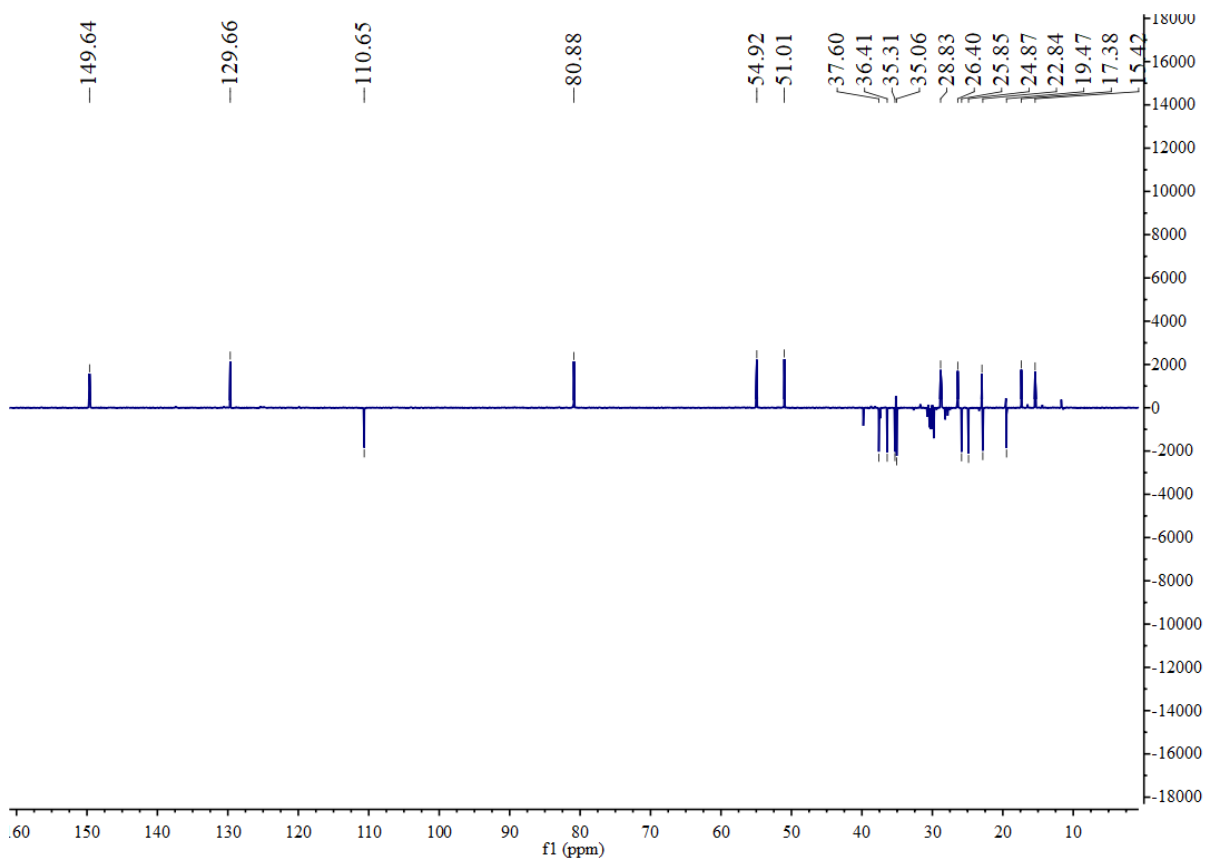

Figure S220 DEPT-135 NMR spectrum of **12c** in acetone- $d_6$  (100 MHz).

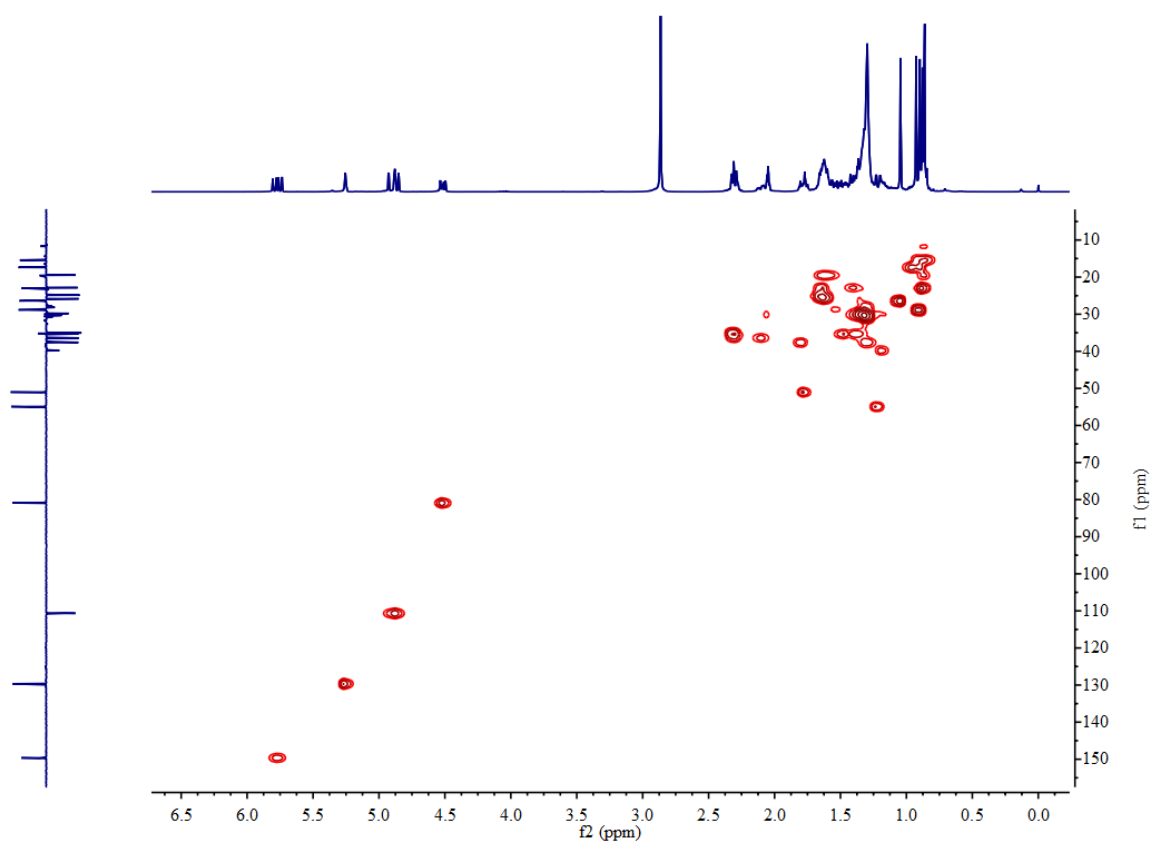

Figure S221 HSQC spectrum of **12c** in acetone- $d_6$  (400 MHz).

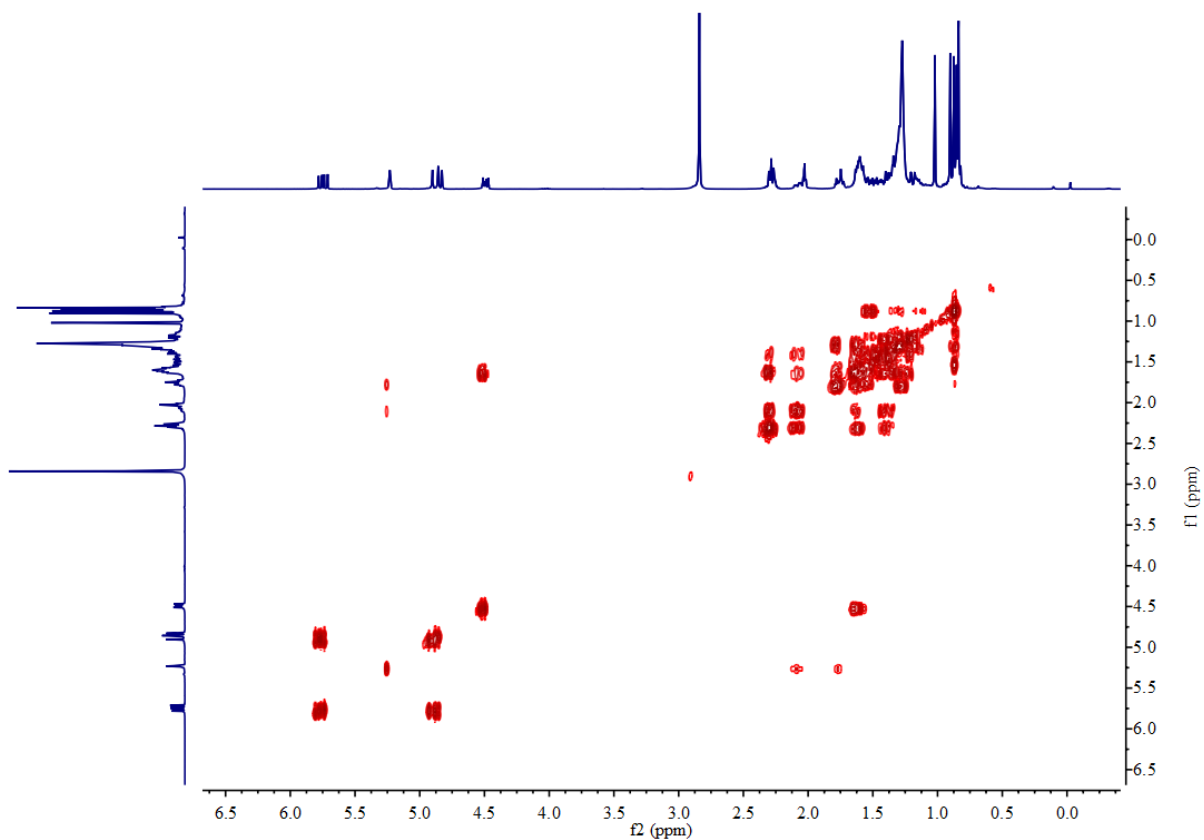

Figure S222  $^1\text{H}$ - $^1\text{H}$  COSY spectrum of **12c** in acetone- $d_6$  (400 MHz).

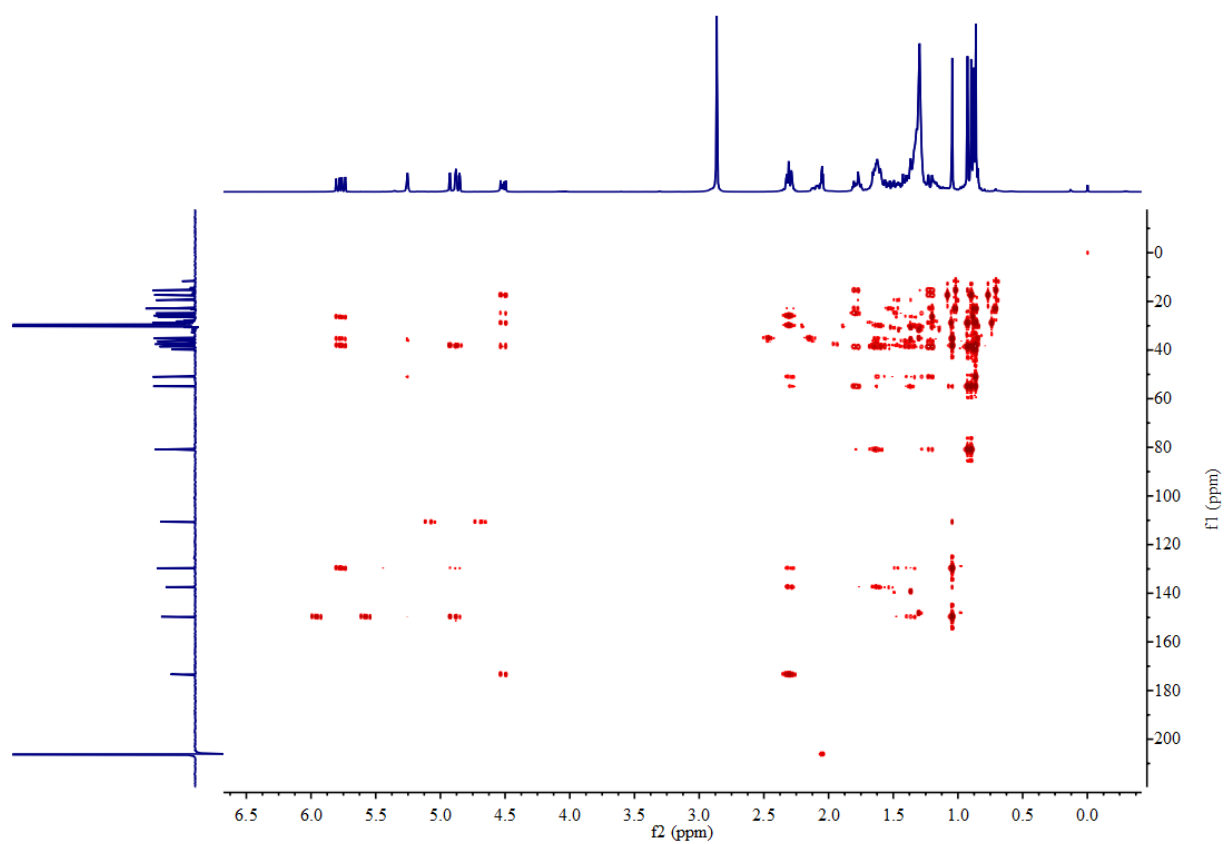

Figure S223 HMBC spectrum of **12c** in acetone- $d_6$  (400 MHz).



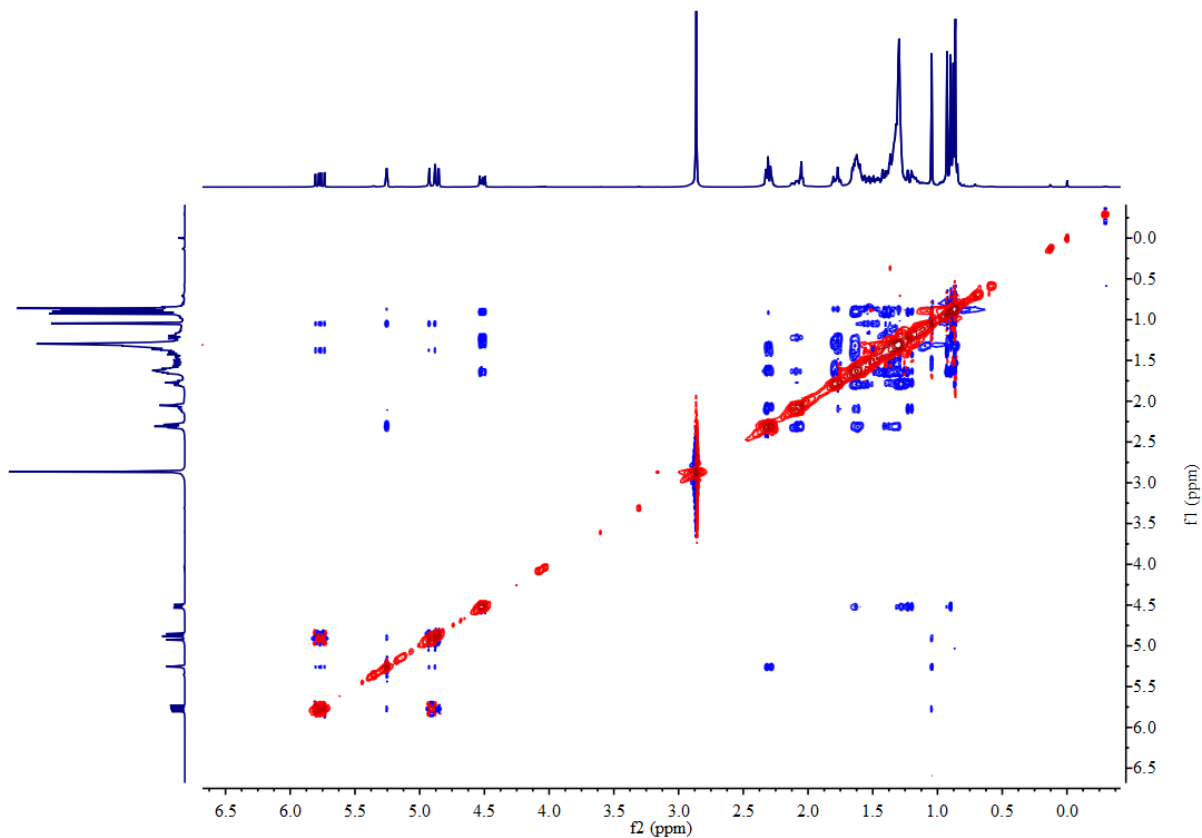

Figure S224 NOESY spectrum of **12c** in acetone- $d_6$  (400 MHz).

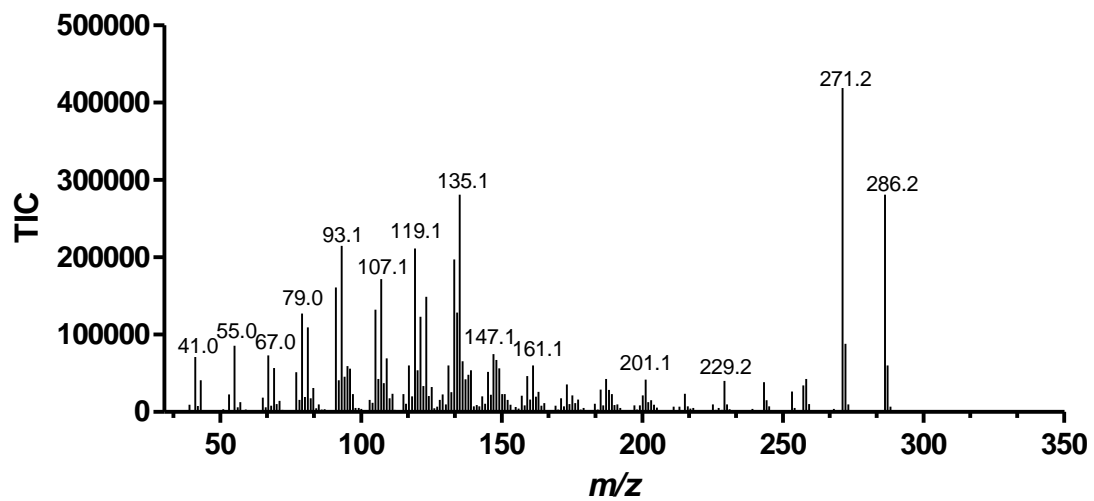

Figure S225 EI mass spectrum of **12c**.

## References

- (1) Nikodinovic, J., Barrow, K. D., Chuck, J. A. (2003) High yield preparation of genomic DNA from *Streptomyces*. *Bio-Techniques* 35, 932–936.
- (2) Sekurova, O. N., Brautaset, T., Sletta, H., Borgos, S. E., Jakobsen M, Ø. M., Ellingsen, T. E., Strøm, A. R., Valla, S., Zotchev, S. B. (2004) *In vivo* analysis of the regulatory genes in the nystatin biosynthetic gene cluster of *Streptomyces noursei* ATCC 11455 reveals their differential control over antibiotic biosynthesis. *J. bacteriol.* 186, 1345–1354.
- (3) Hopwood, D. A., Bibb, M. J., Chater, K. F., Kieser, T., Bruton, C. J., Kieser, H. M., Lydiate, D. J., Smith, C. P., Ward, J. M., Schrempf, H., (1985) Genetic manipulation of *Streptomyces*-A laboratory manual, *Cold Spring Harbor Laboratory Press*, New York.
- (4) Gerlt J. A. (2017) Genomic enzymology: web tools for leveraging protein family sequence-function space and genome context to discover novel functions. *Biochemistry* 56, 4293–4308.
- (5) Ikeda, H., Shin-Ya, K., Nagamitsu, T., Tomoda, H. (2016) Biosynthesis of mercapturic acid derivative of the labdane-type diterpene, cyslabdan that potentiates imipenem activity against methicillin-resistant *Staphylococcus aureus*: cyslabdan is generated by mycothiol-mediated xenobiotic detoxification. *J. Ind. Microbiol. Biotechnol.* 43, 325–342.
- (6) Yamada, Y., Komatsu, M., Ikeda, H. (2016) Chemical diversity of labdane-type bicyclic diterpene biosynthesis in Actinomycetales microorganisms. *J. Antibiot(Tokyo)*. 69, 515–523.
- (7) Rabe, P., Samborsky, M., Leadlay, P. F., Dickschat, J. S. (2017) Isoafricanol synthase from *Streptomyces malaysiensis*. *Org. Biomol. Chem.* 15, 2353–2358.
- (8) Komatsu, M., Tsuda, M., Omura, S., Oikawa, H., Ikeda, H. (2008) Identification and functional analysis of genes controlling biosynthesis of 2-methylisoborneol. *Proc. Natl. Acad. Sci. U. S. A.* 105, 7422–7427.
- (9) Dickschat J. S. (2016) Bacterial terpene cyclases. *Nat. Prod. Rep.* 33, 87–110.
- (10) Brock, N. L., Ravella, S. R., Schulz, S., Dickschat, J. S. (2013). A detailed view of 2-methylisoborneol biosynthesis. *Angew. Chem. Int. Ed. Eng.* 52, 2100–2104.
- (11) Duell, E. R., D'Agostino, P. M., Shapiro, N., Woyke, T., Fuchs, T. M., Gulder, T. (2019) Direct pathway cloning of the sodorifen biosynthetic gene cluster and recombinant generation of its product in *E. coli*. *Microb. Cell Fact.* 18, 32.
- (12) Li, Z., Jiang, Y., Zhang, X., Chang, Y., Li, S., Zhang, X., Zheng, S., Geng, C., Men, P., Ma, L., Yang, Y., Gao, Z., Tang, Y., Li, S., (2020) Fragrant venezuelaenes A and B with a 5–5–6–7 tetracyclic skeleton: discovery, biosynthesis, and mechanisms of central catalysts. *ACS Catal.* 10, 5846–5851.
- (13) Klapschinski, T. A., Rabe, P., Dickschat, J. S. (2016) Pristinol, a sesquiterpene alcohol with an unusual skeleton from *Streptomyces pristinaespiralis*. *Angew. Chem. Int. Ed. Eng.* 55, 10141–10144.
- (14) Hayashi, Y., Matsuura, N., Toshima, H., Itoh, N., Ishikawa, J., Mikami, Y., Dairi, T. (2008) Cloning of the gene cluster responsible for the biosynthesis of brasilicardin A, a unique diterpenoid. *J. Antibiot.* 61, 164–174.
- (15) Nakano, C., Hoshino, T. (2009) Characterization of the Rv3377c gene product, a type-B diterpene cyclase, from the *Mycobacterium tuberculosis* H37 genome. *Chembiochem* 10, 2060–2071.
- (16) Rabe, P., Rinkel, J., Dolja, E., Schmitz, T., Nubbemeyer, B., Luu, T. H., Dickschat, J. S. (2017) Mechanistic investigations of two bacterial diterpene cyclases: spiroviolene synthase and tsukubadiene synthase. *Angew. Chem. Int. Ed. Eng.* 56, 2776–2779.
- (17) Morrone, D., Chambers, J., Lowry, L., Kim, G., Anterola, A., Bender, K., Peters, R. J. (2009) Gibberellin biosynthesis in bacteria: separate *ent*-copalyl diphosphate and *ent*-kaurene synthases in *Bradyrhizobium japonicum*. *FEBS Lett.* 583, 475–480.

- (18) Ikeda, C., Hayashi, Y., Itoh, N., Seto, H., Dairi, T. (2007) Functional analysis of eubacterial ent-copalyl diphosphate synthase and pimara-9(11),15-diene synthase with unique primary sequences. *J. Biochem.* *141*, 37–45.
- (19) Ikeda, H., Ishikawa, J., Hanamoto, A., Shinose, M., Kikuchi, H., Shiba, T., Sakaki, Y., Hattori, M., & Omura, S. (2003). Complete genome sequence and comparative analysis of the industrial microorganism *Streptomyces avermitilis*. *Nat. Biotechnol.* *21*, 526–531.
- (20) Hamano, Y., Kuzuyama, T., Itoh, N., Furihata, K., Seto, H., Dairi, T. (2002) Functional analysis of eubacterial diterpene cyclases responsible for biosynthesis of a diterpene antibiotic, terpentecin. *J. Biol. Chem.* *277*, 37098–37104.
- (21) Jiang, J., He, X., Cane, D. E. (2006) Geosmin biosynthesis. *Streptomyces coelicolor* germacradienol/germacrene D synthase converts farnesyl diphosphate to geosmin. *J. Am. Chem. Soc.* *128*, 8128–8129.
- (22) Hou, A., Dickschat, J. S. (2020) On the mass spectrometric fragmentations of the bacterial sesterterpenes sestermonaraenes A-C. *Beilstein J. Org. Chem.* *16*, 2807–2819.
- (23) Rabe, P., Rinkel, J., Klapschinski, T. A., Barra, L., Dickschat, J. S. (2016) A method for investigating the stereochemical course of terpene cyclisations. *Org. Biomol. Chem.* *14*, 158–164.
- (24) Rinkel, J., Steiner, S. T., Dickschat, J. S. (2019) Diterpene biosynthesis in actinomycetes: studies on cattleyene synthase and phomopsene synthase. *Angew. Chem. Int. Ed.* *58*, 9230–9233.
- (25) Yang, Y. L., Zhang, S., Ma, K., Xu, Y., Tao, Q., Chen, Y., Chen, J., Guo, S., Ren, J., Wang, W., Tao, Y., Yin, W. B., Liu, H. (2017) Discovery and characterization of a new family of diterpene cyclases in bacteria and fungi. *Angew. Chem. Int. Ed. Eng.* *56*, 4749–4752.
- (26) Rinkel, J., Lauterbach, L., Rabe, P., Dickschat, J. S. (2018) Two diterpene synthases for spiroalbatene and cembrene A from *Allokutzneria albata*. *Angew. Chem. Int. Ed. Eng.* *57*, 3238–3241.
- (27) Lauterbach, L., Rinkel, J., Dickschat, J. S. (2018) Two Bacterial Diterpene Synthases from *Allokutzneria albata* Produce Bonnadiene, Phomopsene, and Allokutznerene. *Angew. Chem. Int. Ed. Eng.* *57*, 8280–8283.
- (28) Rinkel, J., Dickschat, J. S. (2019). Mechanistic investigations on multiproduct  $\beta$ -himachalene synthase from *Cryptosporangium arzum*. *Beilstein J. Org. Chem.* *15*, 1008–1019.
- (29) Rinkel, J., Dickschat, J. S. (2019). Stereochemical investigations on the biosynthesis of achiral (*Z*)- $\gamma$ -bisabolene in *Cryptosporangium arzum*. *Beilstein J. Org. Chem.* *15*, 789–794.
- (30) Lauterbach, L., Goldfuss, B., Dickschat, J. S. (2020) Two Diterpene Synthases from *Chryseobacterium*: Chryseodiene Synthase and Wanjudiene Synthase. *Angew. Chem. Int. Ed. Eng.* *59*, 11943–11947.
- (31) Rinkel, J., Dickschat, J. S. (2019) Characterization of Micromonocyclol Synthase from the Marine Actinomycete *Micromonospora marina*. *Org. Lett.* *21*, 9442–9445.
- (32) Rinkel, J., Lauterbach, L., Dickschat, J. S. (2017) Spata-13,17-diene Synthase - An enzyme with sesqui-, di-, and sesterterpene synthase activity from *Streptomyces xinghaiensis*. *Angew. Chem. Int. Ed. Eng.* *56*, 16385–16389.
- (33) Zhu, C., Xu, B., Adpressa, D. A., Rudolf, J. D., Loesgen, S. (2021). Discovery and Biosynthesis of a Structurally Dynamic Antibacterial Diterpenoid. *Angew. Chem. Int. Ed. Eng.* *60*, 14163–14170.
- (34) Tesso, H., König, W. A., Kubeczka, K. H., Bartnik, M., Glowinski, K. (2005) Secondary metabolites of *Peucedanum tauricum* fruits. *Phytochemistry*, *66*, 707–713.
- (35) Fürstner, A., Schlecker, A. (2008) A gold-catalyzed entry into the sesquisabinene and sesquithujene families of terpenoids and formal total syntheses of cedrene and cedrol. *Chemistry* *14*, 9181–9191.
- (36) Kato, T., Suzuki, M., Kobayashi, T., Moore, B.P. (1980) Synthesis and pheromone activities of optically active neocembrenes and their geometrical isomers, (*E*, *Z*, *E*) - and (*E*, *E*, *Z*) neocembrenes. *J. Org. Chem.* *45*, 1126–1130.

- (37) Kenmoku, H., Tanaka, M., Ogiyama, K., Kato, N., Sassa, T. (2004) Identification of (+)-phyllocladene, (-)-sandaracopimaradiene, and (+)-kaurene as new fungal metabolites from fusicoccin-producing *Phomopsis amygdali* F6. *Biosci. Biotechno. Biochem.* 68, 1574–1577.
- (38) Yajima, A., Yamaguchi, A., Nukada, T., Yabuta, G. (2007) Asymmetric total synthesis of *ent*-sandaracopimaradiene, a biosynthetic intermediate of oryzalexins. *Biosci. Biotechno. Biochem.* 71, 2822–2829.
- (39) Wang, Q., Hillwig, M. L., Wu, Y., Peters, R. J. (2012) CYP701A8: a rice *ent*-kaurene oxidase paralog diverted to more specialized diterpenoid metabolism. *Plant physiol.* 158, 1418–1425.
- (40) Mori, K., Waku M. (1985) Synthesis of oryzalexins a, b and c, the diterpenoidal phytoalexins isolated from rice blast leaves infected with *pyricularia oryzae*. *Tetrahedron* 41, 5653–5660.
